# Supplementary material
Source: MDPI journal article supplement (https://www.mdpi.com/2624-8549/5/1/2)
Supplement: s1 [file s1]

Archive with 5 entries (5 files):
- 2D-Fe-MOF.cif
- 2D-Fe-MOF_cifreport.PDF
- 3D-Fe-MOF.cif
- 3D-Fe-MOF_cifreport.PDF
- Revised Supplementary materials.pdf
