# Supplementary material
Source: MDPI journal article supplement (https://www.mdpi.com/2624-8549/5/1/2)
Supplement: s1 [file s1 › 2D-Fe-MOF.cif]

data_pgo929b_0ma
_audit_creation_date               2022-11-24
_audit_creation_method
;
Olex2 1.5
(compiled 2021.12.09 svn.r5202d8cf for OlexSys, GUI svn.r6439)
;
_shelx_SHELXL_version_number       '2018/3'
_audit_contact_author_address      ?
_audit_contact_author_email        ?
_audit_contact_author_name         ''
_audit_contact_author_phone        ?
_publ_contact_author_id_orcid      ?
_publ_section_references
;
Dolomanov, O.V., Bourhis, L.J., Gildea, R.J, Howard, J.A.K. & Puschmann, H.
 (2009), J. Appl. Cryst. 42, 339-341.

Sheldrick, G.M. (2015). Acta Cryst. A71, 3-8.

Sheldrick, G.M. (2015). Acta Cryst. C71, 3-8.
;
_chemical_name_common              ?
_chemical_name_systematic          ?
_chemical_formula_moiety           'C18 H14 Fe N2 O12, 2(H2 O)'
_chemical_formula_sum              'C18 H18 Fe N2 O14'
_chemical_formula_weight           542.19
_chemical_melting_point            ?
loop_
  _atom_type_symbol
  _atom_type_description
  _atom_type_scat_dispersion_real
  _atom_type_scat_dispersion_imag
  _atom_type_scat_source
 'C' 'C' 0.0181 0.0091 'International Tables Vol C Tables 4.2.6.8 and 6.1.1.4'
 'H' 'H' 0.0000 0.0000 'International Tables Vol C Tables 4.2.6.8 and 6.1.1.4'
 'Fe' 'Fe' -1.1336 3.1974
 'International Tables Vol C Tables 4.2.6.8 and 6.1.1.4'
 'N' 'N' 0.0311 0.0180 'International Tables Vol C Tables 4.2.6.8 and 6.1.1.4'
 'O' 'O' 0.0492 0.0322 'International Tables Vol C Tables 4.2.6.8 and 6.1.1.4'

_shelx_space_group_comment
;
The symmetry employed for this shelxl refinement is uniquely defined
by the following loop, which should always be used as a source of
symmetry information in preference to the above space-group names.
They are only intended as comments.
;
_space_group_crystal_system        'monoclinic'
_space_group_IT_number             14
_space_group_name_H-M_alt          'P 1 21/n 1'
_space_group_name_Hall             '-P 2yn'
loop_
  _space_group_symop_operation_xyz
 'x, y, z'
 '-x+1/2, y+1/2, -z+1/2'
 '-x, -y, -z'
 'x-1/2, -y-1/2, z-1/2'

_cell_length_a                     10.7010(3)
_cell_length_b                     4.49550(10)
_cell_length_c                     21.6669(6)
_cell_angle_alpha                  90
_cell_angle_beta                   94.7210(10)
_cell_angle_gamma                  90
_cell_volume                       1038.78(5)
_cell_formula_units_Z              2
_cell_measurement_reflns_used      8096
_cell_measurement_temperature      219.99
_cell_measurement_theta_max        68.409
_cell_measurement_theta_min        4.095
_shelx_estimated_absorpt_T_max     0.879
_shelx_estimated_absorpt_T_min     0.338
_exptl_absorpt_coefficient_mu      6.591
_exptl_absorpt_correction_T_max    0.7531
_exptl_absorpt_correction_T_min    0.5274
_exptl_absorpt_correction_type     multi-scan
_exptl_absorpt_process_details
;
SADABS-2016/2 (Bruker,2016/2) was used for absorption correction.
wR2(int) was 0.0832 before and 0.0449 after correction.
The Ratio of minimum to maximum transmission is 0.7003.
The \l/2 correction factor is Not present.
;
_exptl_absorpt_special_details     ?
_exptl_crystal_colour              ?
_exptl_crystal_colour_lustre       ?
_exptl_crystal_colour_modifier     ?
_exptl_crystal_density_diffrn      1.733
_exptl_crystal_density_meas        ?
_exptl_crystal_density_method      ?
_exptl_crystal_description         plate
_exptl_crystal_F_000               556
_exptl_crystal_size_max            0.21
_exptl_crystal_size_mid            0.085
_exptl_crystal_size_min            0.02
_exptl_transmission_factor_max     ?
_exptl_transmission_factor_min     ?
_diffrn_reflns_av_R_equivalents    0.0439
_diffrn_reflns_av_unetI/netI       0.0293
_diffrn_reflns_Laue_measured_fraction_full  0.997
_diffrn_reflns_Laue_measured_fraction_max  0.996
_diffrn_reflns_limit_h_max         12
_diffrn_reflns_limit_h_min         -10
_diffrn_reflns_limit_k_max         5
_diffrn_reflns_limit_k_min         -5
_diffrn_reflns_limit_l_max         26
_diffrn_reflns_limit_l_min         -26
_diffrn_reflns_number              9797
_diffrn_reflns_point_group_measured_fraction_full  0.997
_diffrn_reflns_point_group_measured_fraction_max  0.996
_diffrn_reflns_theta_full          67.679
_diffrn_reflns_theta_max           68.395
_diffrn_reflns_theta_min           4.094
_diffrn_ambient_temperature        219.99
_diffrn_detector_area_resol_mean   ?
_diffrn_measured_fraction_theta_full  0.997
_diffrn_measured_fraction_theta_max  0.996
_diffrn_measurement_device_type    'Bruker APEX-II CCD'
_diffrn_measurement_method         '\f and \w scans'
_diffrn_radiation_type             CuK\a
_diffrn_radiation_wavelength       1.54178
_diffrn_source                     ?
_diffrn_source_current             1.1
_diffrn_source_power               0.05500000000000001
_diffrn_source_voltage             50.0
_diffrn_standards_number           0
_reflns_Friedel_coverage           0.000
_reflns_Friedel_fraction_full      .
_reflns_Friedel_fraction_max       .
_reflns_number_gt                  1845
_reflns_number_total               1899
_reflns_special_details
;
 Reflections were merged by SHELXL according to the crystal
 class for the calculation of statistics and refinement.
 
 _reflns_Friedel_fraction is defined as the number of unique
 Friedel pairs measured divided by the number that would be
 possible theoretically, ignoring centric projections and
 systematic absences.
;
_reflns_threshold_expression       'I > 2\s(I)'
_computing_cell_refinement         'SAINT V8.38A (Bruker, 2018)'
_computing_data_collection         ?
_computing_data_reduction          'SAINT V8.38A (Bruker, 2018)'
_computing_molecular_graphics      'Olex2 1.5 (Dolomanov et al., 2009)'
_computing_publication_material    'Olex2 1.5 (Dolomanov et al., 2009)'
_computing_structure_refinement    'SHELXL 2018/3 (Sheldrick, 2015)'
_computing_structure_solution      'SHELXT 2014/5 (Sheldrick, 2014)'
_refine_diff_density_max           0.544
_refine_diff_density_min           -0.314
_refine_diff_density_rms           0.068
_refine_ls_extinction_coef         .
_refine_ls_extinction_method       none
_refine_ls_goodness_of_fit_ref     1.061
_refine_ls_hydrogen_treatment      refall
_refine_ls_matrix_type             full
_refine_ls_number_parameters       196
_refine_ls_number_reflns           1899
_refine_ls_number_restraints       0
_refine_ls_R_factor_all            0.0318
_refine_ls_R_factor_gt             0.0312
_refine_ls_restrained_S_all        1.061
_refine_ls_shift/su_max            0.000
_refine_ls_shift/su_mean           0.000
_refine_ls_structure_factor_coef   Fsqd
_refine_ls_weighting_details      
 'w=1/[\s^2^(Fo^2^)+(0.0618P)^2^+0.3595P] where P=(Fo^2^+2Fc^2^)/3'
_refine_ls_weighting_scheme        calc
_refine_ls_wR_factor_gt            0.0876
_refine_ls_wR_factor_ref           0.0886
_refine_special_details            ?
_olex2_refinement_description
;
;
_atom_sites_solution_hydrogens     difmap
_atom_sites_solution_primary       dual
_atom_sites_solution_secondary     ?
loop_
  _atom_site_label
  _atom_site_type_symbol
  _atom_site_fract_x
  _atom_site_fract_y
  _atom_site_fract_z
  _atom_site_U_iso_or_equiv
  _atom_site_adp_type
  _atom_site_occupancy
  _atom_site_site_symmetry_order
  _atom_site_calc_flag
  _atom_site_refinement_flags_posn
  _atom_site_refinement_flags_adp
  _atom_site_refinement_flags_occupancy
  _atom_site_disorder_assembly
  _atom_site_disorder_group
 Fe1 Fe 0.000000 1.000000 0.500000 0.01672(15) Uani 1 2 d S . P . .
 O1 O 0.05497(10) 0.6731(3) 0.44175(5) 0.0216(3) Uani 1 1 d . . . . .
 O6 O -0.13981(11) 1.1221(3) 0.42552(6) 0.0238(3) Uani 1 1 d . . . . .
 O2 O 0.15594(10) 0.2591(2) 0.47185(5) 0.0228(3) Uani 1 1 d . . . . .
 O5 O 0.61028(11) 0.1591(3) 0.45431(6) 0.0270(3) Uani 1 1 d . . . . .
 O7 O 0.64937(13) 1.1051(3) 0.15314(6) 0.0277(3) Uani 1 1 d . . . . .
 N1 N 0.39865(13) 0.2412(3) 0.45500(6) 0.0190(3) Uani 1 1 d . . . . .
 O4 O 0.62970(13) 0.7200(4) 0.28069(7) 0.0513(5) Uani 1 1 d . . . . .
 O3 O 0.48097(17) 0.9882(4) 0.23131(9) 0.0509(6) Uani 1 1 d . . . . .
 C7 C 0.37251(16) 0.4553(4) 0.40836(8) 0.0177(3) Uani 1 1 d . . . . .
 C8 C 0.50805(14) 0.1132(3) 0.47358(7) 0.0181(3) Uani 1 1 d . . . . .
 C2 C 0.25148(14) 0.5858(4) 0.40275(7) 0.0171(3) Uani 1 1 d . . . . .
 C1 C 0.14719(17) 0.5011(3) 0.44240(9) 0.0169(4) Uani 1 1 d . . . . .
 C3 C 0.22472(15) 0.7971(4) 0.35664(7) 0.0197(3) Uani 1 1 d . . . . .
 C5 C 0.42939(15) 0.7439(4) 0.32119(7) 0.0226(4) Uani 1 1 d . . . . .
 C6 C 0.46072(18) 0.5384(4) 0.36794(9) 0.0216(4) Uani 1 1 d . . . . .
 C4 C 0.31158(15) 0.8746(4) 0.31558(8) 0.0223(4) Uani 1 1 d . . . . .
 C9 C 0.52448(16) 0.8152(4) 0.27666(8) 0.0283(4) Uani 1 1 d . . . . .
 H6A H -0.213(2) 1.115(5) 0.4352(10) 0.026(5) Uiso 1 1 d . . . . .
 H1 H 0.333(2) 0.186(5) 0.4726(9) 0.024(5) Uiso 1 1 d . . . . .
 H3A H 0.145(2) 0.880(5) 0.3525(9) 0.023(5) Uiso 1 1 d . . . . .
 H6 H 0.539(3) 0.447(6) 0.3715(11) 0.032(6) Uiso 1 1 d . . . . .
 H4 H 0.292(3) 1.017(5) 0.2854(12) 0.028(6) Uiso 1 1 d . . . . .
 H3 H 0.536(3) 1.025(5) 0.2076(15) 0.046(9) Uiso 1 1 d . . . . .
 H7A H 0.720(3) 1.131(6) 0.1722(12) 0.042(7) Uiso 1 1 d . . . . .
 H7B H 0.636(3) 1.235(7) 0.1318(13) 0.045(8) Uiso 1 1 d . . . . .
 H6B H -0.134(2) 1.271(7) 0.4033(14) 0.048(7) Uiso 1 1 d . . . . .

loop_
  _atom_site_aniso_label
  _atom_site_aniso_U_11
  _atom_site_aniso_U_22
  _atom_site_aniso_U_33
  _atom_site_aniso_U_23
  _atom_site_aniso_U_13
  _atom_site_aniso_U_12
 Fe1 0.0134(2) 0.0140(2) 0.0232(2) 0.00167(11) 0.00435(15) 0.00198(11)
 O1 0.0169(6) 0.0214(6) 0.0269(6) 0.0002(4) 0.0038(4) 0.0048(4)
 O6 0.0161(6) 0.0259(7) 0.0296(6) 0.0055(5) 0.0040(4) 0.0038(5)
 O2 0.0167(6) 0.0187(6) 0.0338(6) 0.0065(5) 0.0071(4) 0.0018(4)
 O5 0.0147(6) 0.0320(7) 0.0351(6) 0.0124(5) 0.0057(5) 0.0039(5)
 O7 0.0271(7) 0.0291(8) 0.0268(6) 0.0047(6) 0.0006(5) -0.0035(6)
 N1 0.0144(7) 0.0182(7) 0.0248(7) 0.0056(5) 0.0041(5) 0.0015(5)
 O4 0.0229(8) 0.0827(12) 0.0499(9) 0.0353(9) 0.0123(6) 0.0139(7)
 O3 0.0297(9) 0.0795(15) 0.0455(10) 0.0403(8) 0.0157(8) 0.0159(7)
 C7 0.0153(8) 0.0157(7) 0.0219(8) 0.0007(6) 0.0002(6) 0.0007(6)
 C8 0.0158(8) 0.0168(8) 0.0219(8) 0.0012(6) 0.0024(5) 0.0016(6)
 C2 0.0154(8) 0.0141(7) 0.0219(7) -0.0018(6) 0.0015(6) -0.0006(6)
 C1 0.0144(9) 0.0158(9) 0.0202(9) -0.0022(5) 0.0000(7) 0.0002(5)
 C3 0.0168(8) 0.0176(7) 0.0243(8) 0.0001(6) -0.0012(6) 0.0020(6)
 C5 0.0207(8) 0.0234(8) 0.0237(8) 0.0023(6) 0.0017(6) -0.0025(6)
 C6 0.0153(9) 0.0236(8) 0.0260(9) 0.0030(6) 0.0024(7) 0.0017(6)
 C4 0.0213(8) 0.0220(9) 0.0231(8) 0.0042(6) -0.0006(6) 0.0002(6)
 C9 0.0220(9) 0.0347(9) 0.0284(9) 0.0087(7) 0.0025(7) -0.0003(7)

_geom_special_details
;
 All esds (except the esd in the dihedral angle between two l.s. planes)
 are estimated using the full covariance matrix.  The cell esds are taken
 into account individually in the estimation of esds in distances, angles
 and torsion angles; correlations between esds in cell parameters are only
 used when they are defined by crystal symmetry.  An approximate (isotropic)
 treatment of cell esds is used for estimating esds involving l.s. planes.
;
loop_
  _geom_bond_atom_site_label_1
  _geom_bond_atom_site_label_2
  _geom_bond_distance
  _geom_bond_site_symmetry_2
  _geom_bond_publ_flag
 Fe1 O1 2.0545(11) 3_576 ?
 Fe1 O1 2.0545(11) . ?
 Fe1 O6 2.1786(12) . ?
 Fe1 O6 2.1785(12) 3_576 ?
 Fe1 O2 2.1635(11) 3_566 ?
 Fe1 O2 2.1635(11) 1_565 ?
 O1 C1 1.253(2) . ?
 O6 H6A 0.83(3) . ?
 O6 H6B 0.83(3) . ?
 O2 C1 1.2609(19) . ?
 O5 C8 1.220(2) . ?
 O7 H7A 0.84(3) . ?
 O7 H7B 0.75(3) . ?
 N1 C7 1.407(2) . ?
 N1 C8 1.337(2) . ?
 N1 H1 0.87(2) . ?
 O4 C9 1.201(2) . ?
 O3 C9 1.308(2) . ?
 O3 H3 0.83(3) . ?
 C7 C2 1.418(2) . ?
 C7 C6 1.390(3) . ?
 C8 C8 1.552(3) 3_656 ?
 C2 C1 1.512(2) . ?
 C2 C3 1.391(2) . ?
 C3 C4 1.383(2) . ?
 C3 H3A 0.92(2) . ?
 C5 C6 1.391(2) . ?
 C5 C4 1.387(2) . ?
 C5 C9 1.494(2) . ?
 C6 H6 0.94(3) . ?
 C4 H4 0.93(2) . ?

loop_
  _geom_angle_atom_site_label_1
  _geom_angle_atom_site_label_2
  _geom_angle_atom_site_label_3
  _geom_angle
  _geom_angle_site_symmetry_1
  _geom_angle_site_symmetry_3
  _geom_angle_publ_flag
 O1 Fe1 O1 180.00(4) 3_576 . ?
 O1 Fe1 O6 93.49(4) . 3_576 ?
 O1 Fe1 O6 86.51(4) 3_576 3_576 ?
 O1 Fe1 O6 86.51(4) . . ?
 O1 Fe1 O6 93.49(4) 3_576 . ?
 O1 Fe1 O2 86.88(4) 3_576 3_566 ?
 O1 Fe1 O2 93.12(4) 3_576 1_565 ?
 O1 Fe1 O2 93.12(4) . 3_566 ?
 O1 Fe1 O2 86.88(4) . 1_565 ?
 O6 Fe1 O6 180.0 3_576 . ?
 O2 Fe1 O6 81.14(5) 3_566 . ?
 O2 Fe1 O6 81.14(5) 1_565 3_576 ?
 O2 Fe1 O6 98.86(5) 3_566 3_576 ?
 O2 Fe1 O6 98.86(5) 1_565 . ?
 O2 Fe1 O2 180.0 3_566 1_565 ?
 C1 O1 Fe1 134.40(11) . . ?
 Fe1 O6 H6A 114.2(15) . . ?
 Fe1 O6 H6B 123.4(19) . . ?
 H6A O6 H6B 107(2) . . ?
 C1 O2 Fe1 125.48(11) . 1_545 ?
 H7A O7 H7B 108(3) . . ?
 C7 N1 H1 113.0(14) . . ?
 C8 N1 C7 128.94(14) . . ?
 C8 N1 H1 118.0(14) . . ?
 C9 O3 H3 111(2) . . ?
 N1 C7 C2 118.08(15) . . ?
 C6 C7 N1 122.07(16) . . ?
 C6 C7 C2 119.85(16) . . ?
 O5 C8 N1 127.72(14) . . ?
 O5 C8 C8 121.36(16) . 3_656 ?
 N1 C8 C8 110.91(16) . 3_656 ?
 C7 C2 C1 123.98(15) . . ?
 C3 C2 C7 118.46(15) . . ?
 C3 C2 C1 117.51(14) . . ?
 O1 C1 O2 124.31(17) . . ?
 O1 C1 C2 117.12(13) . . ?
 O2 C1 C2 118.51(15) . . ?
 C2 C3 H3A 118.5(13) . . ?
 C4 C3 C2 121.64(15) . . ?
 C4 C3 H3A 119.8(13) . . ?
 C6 C5 C9 118.47(16) . . ?
 C4 C5 C6 120.53(16) . . ?
 C4 C5 C9 120.99(15) . . ?
 C7 C6 C5 120.09(17) . . ?
 C7 C6 H6 118.9(16) . . ?
 C5 C6 H6 120.9(16) . . ?
 C3 C4 C5 119.39(15) . . ?
 C3 C4 H4 120.3(17) . . ?
 C5 C4 H4 120.3(17) . . ?
 O4 C9 O3 122.68(17) . . ?
 O4 C9 C5 124.13(16) . . ?
 O3 C9 C5 113.17(16) . . ?

loop_
  _geom_torsion_atom_site_label_1
  _geom_torsion_atom_site_label_2
  _geom_torsion_atom_site_label_3
  _geom_torsion_atom_site_label_4
  _geom_torsion
  _geom_torsion_site_symmetry_1
  _geom_torsion_site_symmetry_2
  _geom_torsion_site_symmetry_3
  _geom_torsion_site_symmetry_4
  _geom_torsion_publ_flag
 Fe1 O1 C1 O2 82.7(2) . . . . ?
 Fe1 O1 C1 C2 -100.15(17) . . . . ?
 Fe1 O2 C1 O1 23.5(2) 1_545 . . . ?
 Fe1 O2 C1 C2 -153.63(11) 1_545 . . . ?
 N1 C7 C2 C1 -2.2(2) . . . . ?
 N1 C7 C2 C3 -179.83(15) . . . . ?
 N1 C7 C6 C5 177.87(16) . . . . ?
 C7 N1 C8 O5 1.2(3) . . . . ?
 C7 N1 C8 C8 -179.53(16) . . . 3_656 ?
 C7 C2 C1 O1 165.52(16) . . . . ?
 C7 C2 C1 O2 -17.2(2) . . . . ?
 C7 C2 C3 C4 1.9(2) . . . . ?
 C8 N1 C7 C2 -171.89(15) . . . . ?
 C8 N1 C7 C6 8.7(3) . . . . ?
 C2 C7 C6 C5 -1.5(3) . . . . ?
 C2 C3 C4 C5 -1.5(2) . . . . ?
 C1 C2 C3 C4 -175.82(14) . . . . ?
 C3 C2 C1 O1 -16.9(2) . . . . ?
 C3 C2 C1 O2 160.46(16) . . . . ?
 C6 C7 C2 C1 177.16(16) . . . . ?
 C6 C7 C2 C3 -0.4(2) . . . . ?
 C6 C5 C4 C3 -0.5(3) . . . . ?
 C6 C5 C9 O4 -4.7(3) . . . . ?
 C6 C5 C9 O3 173.75(18) . . . . ?
 C4 C5 C6 C7 2.0(3) . . . . ?
 C4 C5 C9 O4 176.5(2) . . . . ?
 C4 C5 C9 O3 -5.0(3) . . . . ?
 C9 C5 C6 C7 -176.80(16) . . . . ?
 C9 C5 C4 C3 178.23(15) . . . . ?

_shelx_res_file
;
TITL pgo929b_0ma_a.res in P2(1)/n
    pgo929b_0ma.res
    created by SHELXL-2018/3 at 12:10:36 on 24-Nov-2022
REM Old TITL PGO929B_0ma in P2(1)/n
REM SHELXT solution in P2(1)/n
REM R1 0.129, Rweak 0.003, Alpha 0.030, Orientation as input
REM Formula found by SHELXT: C20 Fe N2 O12
CELL 1.54178 10.701 4.4955 21.6669 90 94.721 90
ZERR 2 0.0003 0.0001 0.0006 0 0.001 0
LATT 1
SYMM 0.5-X,0.5+Y,0.5-Z
SFAC C H Fe N O
UNIT 36 36 2 4 28

L.S. 10
PLAN  20
SIZE 0.21 0.085 0.02
TEMP -53.16
CONF
BOND $H
list 4
MORE -1
fmap 2
acta
OMIT -12 1 2
REM <olex2.extras>
REM <HklSrc "%.\\PGO929B_0ma.hkl">
REM </olex2.extras>

WGHT    0.061800    0.359500
FVAR       0.68003
FE1   3    0.000000    1.000000    0.500000    10.50000    0.01343    0.01399 =
         0.02321    0.00167    0.00435    0.00198
O1    5    0.054968    0.673071    0.441752    11.00000    0.01694    0.02142 =
         0.02690    0.00017    0.00381    0.00483
O6    5   -0.139805    1.122119    0.425522    11.00000    0.01610    0.02590 =
         0.02961    0.00546    0.00395    0.00384
O2    5    0.155937    0.259095    0.471853    11.00000    0.01672    0.01873 =
         0.03375    0.00653    0.00712    0.00181
O5    5    0.610281    0.159074    0.454312    11.00000    0.01468    0.03195 =
         0.03511    0.01243    0.00567    0.00393
O7    5    0.649367    1.105102    0.153143    11.00000    0.02706    0.02912 =
         0.02676    0.00473    0.00055   -0.00345
N1    4    0.398651    0.241227    0.454999    11.00000    0.01439    0.01825 =
         0.02481    0.00557    0.00406    0.00151
O4    5    0.629704    0.719996    0.280688    11.00000    0.02295    0.08271 =
         0.04987    0.03528    0.01233    0.01392
O3    5    0.480972    0.988183    0.231309    11.00000    0.02968    0.07953 =
         0.04547    0.04027    0.01573    0.01590
C7    1    0.372513    0.455327    0.408357    11.00000    0.01534    0.01574 =
         0.02189    0.00072    0.00022    0.00067
C8    1    0.508051    0.113192    0.473584    11.00000    0.01575    0.01679 =
         0.02194    0.00118    0.00241    0.00159
C2    1    0.251482    0.585764    0.402748    11.00000    0.01537    0.01412 =
         0.02190   -0.00184    0.00151   -0.00059
C1    1    0.147194    0.501110    0.442399    11.00000    0.01440    0.01582 =
         0.02019   -0.00221    0.00001    0.00016
C3    1    0.224724    0.797076    0.356642    11.00000    0.01675    0.01758 =
         0.02431    0.00012   -0.00118    0.00198
C5    1    0.429394    0.743876    0.321190    11.00000    0.02066    0.02339 =
         0.02374    0.00234    0.00171   -0.00254
C6    1    0.460724    0.538373    0.367941    11.00000    0.01530    0.02359 =
         0.02595    0.00299    0.00240    0.00174
C4    1    0.311575    0.874633    0.315577    11.00000    0.02135    0.02197 =
         0.02315    0.00424   -0.00060    0.00022
C9    1    0.524477    0.815185    0.276657    11.00000    0.02195    0.03467 =
         0.02838    0.00873    0.00250   -0.00031
H6A   2   -0.213240    1.114828    0.435188    11.00000    0.02564
H1    2    0.332591    0.185956    0.472640    11.00000    0.02392
H3A   2    0.145410    0.880033    0.352521    11.00000    0.02282
H6    2    0.539435    0.446730    0.371464    11.00000    0.03194
H4    2    0.292085    1.016758    0.285360    11.00000    0.02756
H3    2    0.535838    1.025072    0.207598    11.00000    0.04568
H7A   2    0.720339    1.131313    0.172239    11.00000    0.04170
H7B   2    0.635546    1.235457    0.131839    11.00000    0.04521
H6B   2   -0.133771    1.270812    0.403339    11.00000    0.04768
HKLF 4


REM  pgo929b_0ma_a.res in P2(1)/n
REM wR2 = 0.0886, GooF = S = 1.061, Restrained GooF = 1.061 for all data
REM R1 = 0.0312 for 1845 Fo > 4sig(Fo) and 0.0318 for all 1899 data
REM 196 parameters refined using 0 restraints

END

WGHT      0.0618      0.3595

REM Highest difference peak  0.544,  deepest hole -0.314,  1-sigma level  0.068
Q1    1   0.0322  1.0033  0.4610  11.00000  0.05    0.54
Q2    1  -0.0846  0.9990  0.5039  11.00000  0.05    0.54
Q3    1   0.2999  0.5027  0.4026  11.00000  0.05    0.32
Q4    1   0.2025  0.5317  0.4260  11.00000  0.05    0.29
Q5    1   0.4703  0.7890  0.3001  11.00000  0.05    0.28
Q6    1   0.6232  0.8702  0.3011  11.00000  0.05    0.27
Q7    1   0.2335  0.6041  0.3658  11.00000  0.05    0.26
Q8    1   0.5000  0.0000  0.5000  10.50000  0.05    0.26
Q9    1   0.4402  0.6524  0.3362  11.00000  0.05    0.26
Q10   1   0.4296  0.5175  0.3936  11.00000  0.05    0.24
Q11   1   0.6851  0.1542  0.4662  11.00000  0.05    0.24
Q12   1   0.5942  1.1045  0.1812  11.00000  0.05    0.24
Q13   1   0.0917  0.2443  0.4820  11.00000  0.05    0.22
Q14   1   0.5525  0.5356  0.3817  11.00000  0.05    0.21
Q15   1  -0.1472  1.1470  0.4655  11.00000  0.05    0.21
Q16   1   0.2439  0.7659  0.3934  11.00000  0.05    0.21
Q17   1   0.6002  0.1660  0.4229  11.00000  0.05    0.21
Q18   1   0.3957  0.8360  0.3239  11.00000  0.05    0.21
Q19   1   0.1188  0.2504  0.4443  11.00000  0.05    0.20
Q20   1   0.3525  0.7530  0.3072  11.00000  0.05    0.20
;
_shelx_res_checksum                84411
_shelx_hkl_file
;
   1   1   0   85.09    3.90
   1   1   0   85.69    3.90
   2   2   0  810.22   34.90
   2   2   0  758.92   34.80
   3   3   0  572.54   26.70
   3   3   0  605.04   26.40
   4   4   0   36.80    2.30
  -4  -4   0   39.30    2.30
  -4  -4   0   37.50    2.30
  -4  -5   0   17.40    1.10
  -4  -5   0   17.50    1.20
   4   5   0   18.90    1.20
  -3  -4   0  107.89    5.20
  -3  -4   0  105.89    5.30
   3   4   0  104.79    5.20
   3   4   0  115.09    5.20
  -2  -3   0   14.00    2.40
   2   3   0   14.10    1.20
  -1  -2   0 1501.45   66.89
   1   2   0 1502.15   66.39
   0  -1   0    0.30    0.20
   0  -1   0    0.00    0.40
   1   0   0    0.10    0.10
   1   0   0    0.10    0.10
   1   0   0    0.20    0.10
   1   0   0    0.00    0.10
   1   0   0    0.10    0.10
   1   0   0    0.00    0.10
   2   1   0   32.10    1.70
   2   1   0   30.30    1.60
   3   2   0  118.19    5.70
   3   2   0  126.19    5.90
   4   3   0   17.00    2.00
   4   3   0   21.30    1.60
   5   4   0    8.00    0.90
  -5  -4   0    8.30    1.00
  -3  -5   0  102.19    4.90
  -3  -5   0  102.49    4.70
   3   5   0  105.79    4.90
  -2  -4   0  318.07   14.30
  -2  -4   0  303.57   14.20
   2   4   0  315.97   14.30
   2   4   0  318.17   14.20
  -1  -3   0 1421.36   63.59
   1   3   0 1407.16   62.69
   0  -2   0   26.80    2.20
   0   2   0   25.10    1.40
   1  -1   0   81.09    3.80
   1  -1   0   88.59    3.90
   1  -1   0   78.89    4.00
   1  -1   0   80.09    3.80
   2   0   0 3550.64  152.98
  -2   0   0 3091.59  152.98
   3   1   0  347.57   14.80
   3   1   0  311.67   14.70
   4   2   0 1798.62   75.49
   4   2   0 1607.24   75.59
   5   3   0  136.49    6.80
  -5  -3   0  138.19    6.80
   6   4   0   50.49    2.60
  -6  -4   0   50.39    2.70
  -2  -5   0   -0.60    0.60
   2   5   0   -0.20    0.60
   2   5   0    0.00    0.50
  -1  -4   0   17.80    1.40
  -1  -4   0   19.40    1.80
   1   4   0   22.10    1.60
   1   4   0   19.60    1.70
   0  -3   0    0.50    0.80
   0  -3   0    0.60    1.00
   1  -2   0 1465.15   63.89
   1  -2   0 1391.66   63.39
   1  -2   0 1438.06   63.29
   2  -1   0   30.40    1.70
   2  -1   0   33.60    1.70
   2  -1   0   34.80    1.80
   2  -1   0   33.00    2.00
   3   0   0    0.10    0.30
   3   0   0    0.40    0.30
   3   0   0    0.10    0.30
   3   0   0    0.30    0.30
   3   0   0    0.00    0.40
   3   0   0    0.20    0.30
   4   1   0  209.38    9.70
   4   1   0  220.28    9.90
   4   1   0  214.18   10.00
   4   1   0  221.08    9.80
   5   2   0 1506.15   66.19
   5   2   0 1450.05   66.19
   5   2   0 1514.75   66.39
   6   3   0   83.49    4.80
   6   3   0   77.29    4.00
  -6  -3   0   80.19    4.10
   7   4   0   52.29    2.70
  -7  -4   0   53.49    2.70
  -1  -5   0   65.19    3.40
   1   5   0   68.89    3.30
   1   5   0   67.79    3.30
   0  -4   0  285.77   13.10
   0   4   0  287.87   13.10
   1  -3   0 1519.45   67.29
   1  -3   0 1410.76   65.09
   2  -2   0  716.53   33.80
   2  -2   0  745.33   32.50
   2  -2   0  724.13   32.40
   3  -1   0  336.27   15.00
   3  -1   0  323.67   14.60
   3  -1   0  312.77   14.50
   3  -1   0  322.07   14.50
   3  -1   0  332.87   14.60
   3  -1   0  317.47   14.50
   4   0   0  314.87   14.10
   4   0   0  341.07   13.90
   4   0   0  296.67   14.10
   4   0   0  298.17   13.90
   4   0   0  305.07   13.90
   4   0   0  307.17   13.90
   5   1   0   19.10    1.30
   5   1   0   17.40    1.10
   5   1   0   15.60    1.70
   6   2   0  932.61   41.40
   6   2   0  932.61   41.50
   6   2   0  914.91   41.70
   7   3   0   78.79    4.60
   7   3   0   75.39    3.80
  -7  -3   0   78.19    3.90
   8   4   0   39.70    1.90
   8   4   0   38.10    2.00
  -8  -4   0   39.30    2.00
   0  -5   0    0.30    0.60
   0   5   0    0.20    0.60
   1  -4   0   19.90    1.80
  -1   4   0   20.60    1.70
   2  -3   0   13.70    1.40
   2  -3   0   10.90    1.90
   3  -2   0  111.29    5.40
   3  -2   0  116.69    6.00
   4  -1   0  230.38   10.10
   4  -1   0  218.18   10.00
   4  -1   0  210.88   10.10
   4  -1   0  216.68   10.00
   4  -1   0  215.28   10.30
   4  -1   0  231.68   10.00
   5   0   0    0.10    0.50
   5   0   0    0.00    0.40
   5   0   0    0.10    0.40
   5   0   0   -0.40    0.50
   5   0   0    0.20    0.50
   6   1   0    0.80    0.60
   6   1   0    1.30    0.70
   6   1   0    0.70    0.80
   7   2   0   51.39    3.10
   7   2   0   48.20    3.20
   7   2   0   51.19    4.30
   8   3   0   10.50    1.00
   8   3   0    9.80    0.90
   8   3   0   11.60    1.60
  -8  -3   0   10.10    1.10
   1  -5   0   67.09    3.30
  -1   5   0   65.19    3.30
   2  -4   0  324.27   13.80
   2  -4   0  282.07   13.60
  -2   4   0  307.77   13.80
   3  -3   0  583.94   27.10
   3  -3   0  563.74   26.20
   3  -3   0  598.64   26.20
   4  -2   0 1808.32   80.99
   4  -2   0 1767.72   80.69
   4  -2   0 1885.01   80.59
   4  -2   0 1809.32   80.49
   5  -1   0   20.30    2.00
   5  -1   0   16.40    2.00
   5  -1   0   20.40    1.40
   5  -1   0   18.00    1.30
   5  -1   0   16.50    1.30
   6   0   0 1448.46   71.39
   6   0   0 1661.23   71.29
   6   0   0 1686.53   71.19
   6   0   0 1630.84   71.39
   7   1   0   79.89    4.50
   7   1   0   76.59    4.20
   7   1   0   82.09    4.20
   8   2   0  320.07   14.80
   8   2   0  336.57   14.60
   8   2   0  342.17   15.20
   8   2   0  326.17   14.60
  -8  -2   0  304.97   15.20
   9   3   0   58.19    2.90
   9   3   0   54.99    2.90
   9   3   0   55.89    2.70
  -9  -3   0   58.49    2.90
   2  -5   0    0.30    0.60
  -2   5   0    0.30    0.60
   3  -4   0  106.99    5.20
   3  -4   0  116.09    5.40
  -3   4   0  112.79    5.40
   4  -3   0   18.10    1.90
   4  -3   0   20.70    2.10
   4  -3   0   24.40    3.30
   5  -2   0 1557.94   67.09
   5  -2   0 1580.84   66.49
   5  -2   0 1422.86   66.79
   5  -2   0 1441.36   66.69
   6  -1   0    1.00    0.60
   6  -1   0    1.00    0.70
   6  -1   0    1.00    0.80
   6  -1   0    0.60    0.60
   6  -1   0    0.90    0.90
   6  -1   0    1.90    0.80
   7   0   0    0.30    0.70
   7   0   0    0.10    0.80
   7   0   0   -0.60    1.10
   7   0   0    0.60    0.60
   7   0   0   -0.10    0.60
   8   1   0   35.60    3.80
   8   1   0   33.80    3.30
   8   1   0   35.80    2.60
  10   3   0   37.80    2.00
  10   3   0   40.20    2.00
 -10  -3   0   36.80    1.90
   3  -5   0  112.09    5.10
   3  -5   0  120.19    5.80
  -3   5   0  103.59    5.20
   4  -4   0   39.20    2.30
   4  -4   0   40.80    2.30
   4  -4   0   41.60    2.30
  -4   4   0   40.10    2.40
   5  -3   0  140.19    7.90
   5  -3   0  137.99    6.90
   6  -2   0  870.91   38.80
   6  -2   0  876.61   38.90
   6  -2   0  846.82   39.10
   7  -1   0   76.99    4.20
   7  -1   0   77.19    4.20
   7  -1   0   80.59    4.10
   7  -1   0   78.99    4.20
   7  -1   0   73.59    4.70
   7  -1   0   75.99    4.00
   8   0   0 1926.71   82.59
   8   0   0 1865.21   82.89
   8   0   0 1844.72   82.59
   8   0   0 1796.02   82.39
   9   1   0  194.78    9.20
   9   1   0  203.28    9.00
   9   1   0  197.48    9.50
  10   2   0   66.99    3.70
  10   2   0   68.69    3.50
  10   2   0   66.99    4.00
   4  -5   0   17.00    1.50
   4  -5   0   16.60    1.20
  -4   5   0   17.70    1.30
   5  -4   0    9.10    0.90
   5  -4   0   10.20    0.90
   5  -4   0    6.60    0.70
   5  -4   0    9.70    1.50
  -5   4   0    6.50    0.90
   6  -3   0   77.29    4.30
   6  -3   0   68.09    3.70
   6  -3   0   81.29    3.80
   7  -2   0   49.40    3.20
   7  -2   0   44.50    3.10
   7  -2   0   45.90    4.00
   8  -1   0   36.10    3.70
   8  -1   0   38.10    2.50
   8  -1   0   35.90    2.50
   8  -1   0   34.50    2.70
   9   0   0   -0.40    0.70
   9   0   0   -0.40    0.90
  10   1   0  248.08   11.10
  10   1   0  233.58   11.40
   6  -4   0   57.29    3.40
   6  -4   0   49.20    3.90
  -6   4   0   52.69    2.80
   7  -3   0   66.19    3.50
   7  -3   0   74.29    4.10
   7  -3   0   68.29    3.50
   8  -2   0  302.17   14.00
   8  -2   0  319.37   14.30
   9  -1   0  180.58    8.80
   9  -1   0  201.08    9.10
   9  -1   0  190.48    8.70
  10   0   0   26.30    1.90
  10   0   0   24.40    2.40
  11   1   0   12.10    1.50
  11   1   0   11.10    1.00
  11   1   0   12.90    1.50
   7  -4   0   46.90    2.90
   7  -4   0   48.80    2.50
   8  -3   0    9.20    1.00
   8  -3   0    9.00    1.30
   9  -2   0    7.60    1.30
  10  -1   0  213.18    9.50
  10  -1   0  210.38    9.80
  10  -1   0  199.18    9.40
  11   0   0    3.50    1.10
  12   1   0   26.90    1.90
  12   1   0   19.90    1.60
   8  -4   0   36.80    2.00
   8  -4   0   36.80    2.10
   9  -3   0   52.39    3.10
   9  -3   0   52.19    3.00
  10  -2   0   60.69    3.00
  10  -2   0   54.59    3.50
  11  -1   0    9.80    1.70
  11  -1   0    9.50    0.90
  11  -1   0   10.30    1.00
  12   0   0   29.50    1.80
  12   0   0   26.30    2.60
  10  -3   0   36.90    2.20
  10  -3   0   35.50    2.20
  12  -1   0   27.80    1.90
  12  -1  -1  193.58    8.90
  11  -2  -1   75.39    3.70
  11  -2  -1   81.29    4.00
  10  -3  -1   86.79    4.20
  10  -3  -1   85.19    4.10
  12   0  -1   10.20    1.10
  11  -1  -1    3.20    0.70
  11  -1  -1    1.20    1.70
  11  -1  -1    4.40    0.70
  10  -2  -1   70.69    4.40
  10  -2  -1   69.49    3.50
   9  -3  -1    7.00    1.00
   9  -3  -1    7.50    1.10
   8  -4  -1   -0.20    0.60
   8  -4  -1    0.70    0.60
  12   1  -1  204.88    9.30
  12   1  -1  202.68    9.40
  11   0  -1   19.80    2.20
  11   0  -1   20.50    1.80
  10  -1  -1  623.94   27.60
  10  -1  -1  640.34   27.80
  10  -1  -1  591.74   27.50
   9  -2  -1   24.10    2.30
   8  -3  -1   11.50    1.10
   8  -3  -1   11.40    1.00
   8  -3  -1   11.60    1.30
   7  -4  -1  194.48    9.30
   7  -4  -1  207.18    9.10
  11   1  -1    1.50    1.10
  11   1  -1    2.80    0.60
  11   1  -1    4.90    1.00
  10   0  -1    1.00    1.10
  10   0  -1    0.50    0.80
   9  -1  -1   25.00    1.70
   9  -1  -1   24.30    2.20
   8  -2  -1    0.90    1.00
   8  -2  -1    3.10    0.80
   7  -3  -1   31.40    2.10
   7  -3  -1   36.10    2.00
   7  -3  -1   33.50    2.70
  -6   4   1    1.70    0.70
   6  -4  -1    1.10    1.30
   6  -4  -1    2.20    0.70
  11   2  -1   75.69    4.00
  11   2  -1   84.39    4.00
  11   2  -1   86.49    4.30
  10   1  -1  657.63   29.40
  10   1  -1  659.23   29.70
  10   1  -1  658.03   29.20
   9   0  -1   16.90    1.90
   9   0  -1   15.70    1.50
   8  -1  -1  316.47   14.80
   8  -1  -1  325.17   14.80
   8  -1  -1  327.77   15.00
   8  -1  -1  320.87   14.90
   8  -1  -1  304.97   15.40
   7  -2  -1  148.99    8.50
   7  -2  -1  147.79    7.30
   7  -2  -1  138.39    7.40
   6  -3  -1  111.19    5.60
   6  -3  -1  106.99    5.10
   6  -3  -1  107.49    5.20
  -5   4   1  436.46   20.20
   5  -4  -1  455.65   20.00
   5  -4  -1  490.55   20.10
   5  -4  -1  421.46   20.10
   5  -4  -1  447.66   20.40
  -4   5   1  151.88    6.70
   4  -5  -1  134.39    6.60
   4  -5  -1  154.98    6.80
  10   2  -1   79.19    4.40
  10   2  -1   74.79    3.80
  10   2  -1   82.89    4.00
   9   1  -1   27.20    1.90
   9   1  -1   36.80    2.60
   9   1  -1   32.30    2.20
   8   0  -1    1.40    0.80
   8   0  -1    0.80    0.90
   8   0  -1    4.00    1.30
   8   0  -1    2.40    0.90
   7  -1  -1   71.09    3.70
   7  -1  -1   71.99    3.90
   7  -1  -1   68.69    3.90
   7  -1  -1   71.09    3.90
   7  -1  -1   69.89    3.70
   7  -1  -1   67.09    4.50
   6  -2  -1    4.00    1.30
   6  -2  -1    1.80    0.90
   6  -2  -1    2.10    0.90
   6  -2  -1    4.70    1.10
   5  -3  -1   91.99    5.00
   5  -3  -1   97.09    6.10
  -4   4   1    8.30    1.00
   4  -4  -1    7.10    1.00
   4  -4  -1    7.50    0.80
   4  -4  -1    9.00    0.90
  -3   5   1  184.68    8.50
   3  -5  -1  196.68    8.80
   3  -5  -1  178.78    8.40
 -10  -3   1   84.49    4.00
  10   3  -1   90.89    4.10
  10   3  -1   85.29    4.10
   9   2  -1   29.30    3.00
   9   2  -1   26.50    2.40
   8   1  -1  337.97   15.60
   7   0  -1  386.06   16.90
   7   0  -1  378.46   16.80
   7   0  -1  344.87   17.20
   7   0  -1  375.86   17.20
   7   0  -1  373.66   16.80
   7   0  -1  365.76   16.90
   6  -1  -1  723.83   33.10
   6  -1  -1  783.12   33.10
   6  -1  -1  750.42   33.00
   6  -1  -1  734.73   32.90
   6  -1  -1  701.63   33.30
   5  -2  -1  112.99    5.30
   5  -2  -1  112.59    6.00
   5  -2  -1  101.79    5.40
   5  -2  -1   99.89    5.40
   4  -3  -1  664.73   29.10
   4  -3  -1  624.14   29.00
   4  -3  -1  645.94   29.90
  -3   4   1   13.90    1.50
   3  -4  -1   12.00    1.20
   3  -4  -1   19.30    1.50
   3  -4  -1   12.60    1.10
  -2   5   1   23.30    1.60
   2  -5  -1   19.80    1.50
  -9  -3   1    8.60    0.90
   9   3  -1    9.30    0.70
   9   3  -1    8.20    1.10
   9   3  -1   13.50    1.10
   8   2  -1    1.30    0.40
   8   2  -1    0.60    0.70
   8   2  -1    1.10    1.10
   8   2  -1    1.90    0.70
   7   1  -1   69.59    4.10
   7   1  -1   72.99    3.80
   7   1  -1   72.49    3.90
   6   0  -1   -0.70    0.40
   6   0  -1    0.00    0.60
   6   0  -1    0.20    0.60
   6   0  -1   -0.30    0.80
   6   0  -1    0.70    0.50
   5  -1  -1  732.53   33.30
   5  -1  -1  755.82   33.20
   5  -1  -1  718.13   33.30
   5  -1  -1  763.82   33.40
   5  -1  -1  760.02   33.10
   4  -2  -1   13.60    1.40
   4  -2  -1    9.10    1.40
   4  -2  -1   11.40    1.10
   3  -3  -1   -0.50    1.10
   3  -3  -1   -0.10    0.70
   3  -3  -1   -1.50    0.70
  -2   4   1   29.40    2.10
   2  -4  -1   36.30    2.00
   2  -4  -1   37.00    2.30
  -1   5   1  139.39    6.30
   1  -5  -1  133.49    6.30
  -8  -3   1   13.30    1.40
   8   3  -1   12.50    1.10
   8   3  -1   11.80    1.60
   8   3  -1   10.40    1.00
   7   2  -1  156.68    7.70
   6   1  -1  740.33   33.30
   6   1  -1  751.62   33.30
   6   1  -1  742.83   33.60
   5   0  -1   23.20    2.10
   5   0  -1   19.80    1.30
   5   0  -1   20.70    1.50
   5   0  -1   19.80    1.40
   5   0  -1   19.00    1.30
   5   0  -1   20.90    1.50
   4  -1  -1  408.26   18.10
   4  -1  -1  420.36   18.00
   4  -1  -1  400.86   18.00
   4  -1  -1  413.06   18.30
   4  -1  -1  383.46   18.10
   4  -1  -1  391.86   18.10
   3  -2  -1  178.68    8.40
   3  -2  -1  169.48    8.60
   2  -3  -1  356.16   17.00
   2  -3  -1  355.26   16.30
  -1   4   1   48.20    2.70
   1  -4  -1   50.79    2.80
   0   5   1   25.20    1.70
   0  -5  -1   26.00    1.70
  -8  -4   1    0.20    0.50
   8   4  -1    1.00    0.60
   8   4  -1    0.40    0.40
  -7  -3   1   38.40    2.20
   7   3  -1   34.70    2.10
   7   3  -1   35.90    2.90
   7   3  -1   35.30    2.10
   6   2  -1    4.30    1.00
   6   2  -1    2.40    1.00
   6   2  -1    4.00    0.80
   5   1  -1  733.13   33.10
   5   1  -1  778.02   33.20
   5   1  -1  721.43   33.80
   4   0  -1   -0.10    0.40
   4   0  -1    0.30    0.60
   4   0  -1    0.30    0.40
   4   0  -1    0.00    0.30
   4   0  -1    0.60    0.30
   3  -1  -1    1.90    0.60
   3  -1  -1    2.60    0.50
   3  -1  -1    3.40    0.40
   3  -1  -1    2.30    0.50
   3  -1  -1    2.30    0.50
   3  -1  -1    2.50    0.40
   2  -2  -1    0.20    0.50
   2  -2  -1    0.30    0.60
   1  -3  -1  548.95   25.60
   0   4   1   24.10    1.80
   0  -4  -1   24.50    2.00
   1   5   1   50.49    2.70
   1   5   1   53.29    2.70
  -1  -5  -1   51.19    2.70
  -7  -4   1  213.28    9.60
   7   4  -1  208.78    9.50
  -6  -3   1  120.29    5.80
   6   3  -1  120.99    6.30
   6   3  -1  118.89    5.70
   5   2  -1  107.29    5.50
   5   2  -1  112.39    5.40
   5   2  -1  104.29    5.30
   4   1  -1  400.86   17.80
   4   1  -1  391.96   17.80
   4   1  -1  398.96   18.00
   3   0  -1   21.10    1.20
   3   0  -1   21.90    1.60
   3   0  -1   20.20    1.20
   3   0  -1   22.20    1.20
   3   0  -1   21.10    1.30
   3   0  -1   21.60    1.20
   2  -1  -1  690.03   32.20
   2  -1  -1  743.83   32.40
   2  -1  -1  730.83   32.30
   2  -1  -1  725.13   32.30
   2  -1  -1  756.72   32.60
  -1   2   1  322.37   15.10
   1  -2  -1  350.46   15.20
   1  -2  -1  339.37   15.70
   1  -2  -1  340.17   15.30
   0  -3  -1   36.50    3.30
   1   4   1  389.66   17.10
   1   4   1  384.66   17.00
  -1  -4  -1  369.56   17.10
  -1  -4  -1  367.36   17.00
   2   5   1   13.40    1.20
   2   5   1   13.10    1.10
  -2  -5  -1   12.40    1.20
  -6  -4   1    2.10    0.70
   6   4  -1    1.40    0.60
  -5  -3   1   93.49    5.30
   5   3  -1   95.39    4.60
   5   3  -1   92.69    4.80
   4   2  -1   11.70    1.20
   4   2  -1    8.70    1.10
   3   1  -1    2.00    0.50
   3   1  -1    1.50    0.40
   2   0  -1    0.40    0.40
   2   0  -1    0.40    0.20
   2   0  -1    0.00    0.20
   2   0  -1    0.00    0.20
   2   0  -1   -0.10    0.30
   2   0  -1    0.20    0.20
   1  -1  -1  173.68    8.00
   1  -1  -1  172.68    8.20
   1  -1  -1  185.18    8.00
   0   2   1  296.77   13.70
   0  -2  -1  316.77   14.30
  -1  -3  -1   55.59    3.90
   2   4   1    0.10    0.60
   2   4   1    0.90    0.70
  -2  -4  -1   -0.40    0.60
  -2  -4  -1   -0.30    0.70
   3   5   1   26.70    1.60
  -3  -5  -1   27.30    1.50
  -3  -5  -1   27.30    1.60
  -5  -4   1  451.55   19.90
   5   4  -1  436.46   19.90
   4   3  -1  629.34   26.70
   4   3  -1  556.94   26.90
   3   2  -1  162.78    8.00
   3   2  -1  175.68    8.00
   2   1  -1  720.83   33.10
   2   1  -1  774.42   33.20
   1   0  -1   20.70    1.10
   1   0  -1   23.40    1.00
   1   0  -1   20.70    1.00
   1   0  -1   20.40    1.00
   1   0  -1   21.50    1.00
   0   1   1  111.29    5.10
   0  -1  -1  111.89    5.30
   0  -1  -1  115.19    5.10
   1   2   1  833.02   37.20
  -1  -2  -1  844.92   37.70
  -2  -3  -1  555.54   25.70
   3   4   1  440.56   19.80
   3   4   1  441.86   19.80
  -3  -4  -1  433.56   19.80
  -3  -4  -1  448.56   19.90
   4   5   1  122.19    5.50
  -4  -5  -1  123.09    5.40
  -4  -5  -1  112.39    5.50
  -4  -4   1    6.00    0.90
  -4  -4   1    7.70    1.30
   4   4  -1    7.10    0.90
   3   3  -1    8.60    1.90
   2   2  -1    0.00    0.40
   2   2  -1    0.90    0.50
   1   1  -1  177.88    8.00
   1   1  -1  175.18    7.90
   0   0   1    0.20    0.10
   0   0  -1    0.20    0.10
   0   0  -1    0.10    0.10
   1   1   1 1066.79   46.80
   1   1   1 1053.99   46.90
   2   2   1    2.40    0.50
   2   2   1    1.60    0.40
  -2  -2  -1    1.00    0.70
   3   3   1   51.69    2.70
   3   3   1   48.30    3.40
  -3  -3  -1   48.30    3.50
   4   4   1  258.17   11.70
  -4  -4  -1  269.07   11.80
  -4  -4  -1  244.38   11.80
  -4  -5   1  147.49    6.90
  -4  -5   1  153.38    6.90
   4   5  -1  153.98    6.90
  -3  -4   1   15.30    1.40
  -3  -4   1   14.60    1.30
   3   4  -1   15.20    1.50
   3   4  -1   12.10    1.20
   2   3  -1  360.16   16.30
   1   2  -1  345.17   15.50
   0  -1   1  110.59    5.00
   1   0   1 1493.95   62.59
   1   0   1 1278.87   62.59
   1   0   1 1500.15   62.49
   1   0   1 1401.96   62.59
   2   1   1 1178.88   48.70
   2   1   1 1020.40   48.60
   3   2   1  672.53   31.60
   3   2   1  749.53   31.80
   4   3   1  609.04   26.80
   4   3   1  585.14   27.20
   5   4   1  319.97   14.80
  -5  -4  -1  334.37   14.80
  -3  -5   1  172.28    7.90
  -3  -5   1  176.38    7.90
   3   5  -1  173.78    7.90
  -2  -4   1   32.00    2.00
  -2  -4   1   32.10    2.20
   2   4  -1   31.80    2.10
   2   4  -1   33.60    2.10
  -1  -3   1  535.15   25.10
   1   3  -1  542.65   24.20
   0  -2   1  306.27   13.80
   0  -2   1  315.47   14.50
   0   2  -1  304.37   13.80
   1  -1   1 1069.79   44.80
   1  -1   1  970.40   45.00
   1  -1   1  996.30   44.70
   2   0   1    0.60    0.30
   2   0   1    0.20    0.20
   2   0   1    0.10    0.30
   2   0   1    0.10    0.20
   2   0   1    0.30    0.20
   2   0   1    0.40    0.30
   3   1   1    7.80    0.70
   4   2   1  908.81   43.50
   4   2   1 1085.29   43.70
   4   2   1  929.41   43.30
   5   3   1    7.40    1.50
   5   3   1    3.90    0.70
   5   3   1    3.10    0.80
   5   3   1    5.10    1.40
  -5  -3  -1    4.70    0.80
   6   4   1   19.50    1.50
  -6  -4  -1   18.90    1.60
  -2  -5   1   21.20    1.50
   2   5  -1   19.30    1.40
   2   5  -1   20.70    1.40
  -1  -4   1   47.30    2.60
  -1  -4   1   48.00    2.90
   1   4  -1   53.39    2.80
   1   4  -1   47.80    2.80
   0  -3   1   34.60    2.50
   0  -3   1   36.70    3.40
   0   3  -1   35.60    2.00
   1  -2   1  824.32   36.60
   1  -2   1  809.42   36.10
   1  -2   1  804.62   36.10
   2  -1   1 1098.29   47.90
   2  -1   1 1000.20   47.80
   2  -1   1 1175.88   48.00
   2  -1   1 1056.79   48.10
   3   0   1  594.34   26.20
   3   0   1  594.24   26.20
   3   0   1  568.04   26.20
   3   0   1  569.64   26.20
   3   0   1  621.24   26.10
   4   1   1  705.83   30.60
   4   1   1  667.83   30.40
   4   1   1  671.13   30.70
   4   1   1  701.83   30.60
   5   2   1   15.00    1.30
   5   2   1   15.30    1.60
   5   2   1   14.20    1.50
   6   3   1   38.90    3.30
   6   3   1   34.20    2.10
  -6  -3  -1   37.40    2.30
   7   4   1  190.58    8.70
  -7  -4  -1  195.58    8.80
  -1  -5   1  137.29    6.60
   1   5  -1  139.49    6.50
   1   5  -1  148.69    6.60
   0  -4   1   26.50    2.10
   0   4  -1   27.40    2.00
   1  -3   1   54.89    4.10
   1  -3   1   54.39    3.20
   2  -2   1    1.50    0.50
   2  -2   1    2.80    0.90
   2  -2   1    1.00    0.60
   3  -1   1    8.00    0.70
   3  -1   1    8.30    0.90
   3  -1   1    7.40    0.90
   3  -1   1    8.70    1.40
   3  -1   1    7.90    0.80
   4   0   1    0.10    0.40
   4   0   1   -0.20    0.50
   4   0   1    0.20    0.30
   4   0   1    0.20    0.40
   4   0   1    0.30    0.40
   4   0   1   -0.20    0.40
   5   1   1  811.22   37.10
   5   1   1  820.02   36.60
   5   1   1  842.82   36.70
   6   2   1   51.99    3.30
   6   2   1   56.69    3.10
   6   2   1   53.69    3.30
   7   3   1   63.79    3.40
   7   3   1   72.29    4.40
  -7  -3  -1   66.29    3.50
   8   4   1    9.20    0.80
   8   4   1    8.80    0.80
  -8  -4  -1    9.50    0.90
   0  -5   1   25.30    1.70
   0   5  -1   26.80    1.70
   1  -4   1  384.86   17.30
  -1   4  -1  382.76   17.30
   2  -3   1  570.74   25.20
   2  -3   1  549.54   26.00
   2  -3   1  560.44   25.30
   3  -2   1  685.43   30.60
   3  -2   1  697.43   30.30
   3  -2   1  639.74   30.00
   4  -1   1  786.72   31.30
   4  -1   1  663.63   31.40
   4  -1   1  703.23   31.40
   4  -1   1  714.53   31.60
   4  -1   1  685.33   31.30
   4  -1   1  673.53   31.40
   5   0   1 6559.14  272.47
   5   0   1 6233.48  272.67
   5   0   1 6179.18  272.57
   5   0   1 5514.25  272.67
   5   0   1 6401.26  272.47
   6   1   1  276.27   13.00
   6   1   1  279.97   12.70
   6   1   1  264.57   12.50
   6   1   1  287.67   12.70
   7   2   1  356.56   16.50
   7   2   1  349.47   16.80
   7   2   1  365.36   16.50
   8   3   1   18.00    1.30
   8   3   1   16.80    1.40
   8   3   1   18.00    1.90
  -8  -3  -1   17.50    1.50
   1  -5   1   50.29    2.70
  -1   5  -1   50.69    2.70
   2  -4   1    0.00    0.70
  -2   4  -1    0.80    0.70
   3  -3   1   47.20    3.00
   3  -3   1   48.90    2.90
   3  -3   1   51.89    4.10
   4  -2   1  905.31   40.20
   4  -2   1  891.21   40.30
   4  -2   1  906.91   40.60
   5  -1   1  801.72   36.50
   5  -1   1  764.32   36.60
   5  -1   1  862.51   36.50
   5  -1   1  830.82   36.50
   5  -1   1  880.31   36.30
   5  -1   1  766.62   36.90
   6   0   1    0.20    0.70
   6   0   1   -0.20    0.50
   6   0   1    0.00    0.70
   6   0   1    0.60    0.50
   6   0   1    0.60    0.60
   6   0   1    1.10    0.60
   7   1   1   21.00    2.10
   7   1   1   19.70    2.00
   7   1   1   23.60    1.80
   8   2   1  182.58    8.70
   8   2   1  173.68    7.90
   8   2   1  170.38    8.10
  -8  -2  -1  170.88    8.10
   9   3   1   45.30    2.40
   9   3   1   45.00    2.40
   9   3   1   48.60    3.20
   9   3   1   44.70    2.20
  -9  -3  -1   44.40    2.50
   2  -5   1   13.10    1.20
  -2   5  -1   13.50    1.30
   3  -4   1  425.26   19.90
   3  -4   1  489.35   20.00
  -3   4  -1  423.96   20.00
   4  -3   1  624.04   28.50
   4  -3   1  620.94   27.60
   4  -3   1  593.44   27.60
   5  -2   1   16.20    1.60
   5  -2   1   13.00    1.50
   5  -2   1   15.90    2.30
   5  -2   1   17.00    1.70
   6  -1   1  272.67   12.70
   6  -1   1  264.07   12.70
   6  -1   1  272.97   12.40
   6  -1   1  278.57   12.60
   6  -1   1  270.07   12.90
   6  -1   1  287.37   12.70
   7   0   1 1457.95   63.79
   7   0   1 1410.66   63.79
   7   0   1 1412.56   63.99
   7   0   1 1460.35   63.89
   8   1   1  309.37   14.30
   8   1   1  305.37   14.30
   8   1   1  304.07   14.60
   9   2   1 1035.30   46.50
   9   2   1 1019.70   46.60
   9   2   1 1095.29   47.10
  10   3   1   11.40    1.00
  10   3   1   10.60    0.90
 -10  -3  -1   10.50    0.90
   3  -5   1   30.40    2.20
   3  -5   1   27.50    1.60
  -3   5  -1   25.40    1.90
   4  -4   1  290.27   12.30
   4  -4   1  278.17   12.30
  -4   4  -1  249.18   12.40
   5  -3   1    5.60    1.20
   5  -3   1    5.40    1.00
   5  -3   1    4.60    1.60
   6  -2   1   51.39    3.20
   6  -2   1   54.29    3.40
   6  -2   1   51.69    3.80
   7  -1   1   18.30    1.80
   7  -1   1   19.50    1.60
   7  -1   1   19.50    1.90
   7  -1   1   15.40    2.50
   8   0   1    0.00    0.70
   8   0   1    1.20    0.80
   8   0   1    0.40    0.80
   8   0   1   -0.70    0.90
   9   1   1   17.30    1.40
   9   1   1   17.70    2.20
   9   1   1   17.20    1.70
  10   2   1   57.69    3.60
  10   2   1   57.69    2.80
  10   2   1   54.09    3.10
   4  -5   1  124.89    5.90
   4  -5   1  127.39    5.70
  -4   5  -1  119.19    5.70
   5  -4   1  362.56   14.90
   5  -4   1  308.77   14.80
   5  -4   1  325.87   15.30
  -5   4  -1  333.27   15.00
   6  -3   1   41.00    2.90
   6  -3   1   32.50    2.10
   6  -3   1   36.80    2.20
   7  -2   1  316.67   15.70
   7  -2   1  333.27   15.30
   7  -2   1  325.27   15.10
   8  -1   1  307.67   14.20
   8  -1   1  289.07   13.90
   9   0   1  357.96   17.00
   9   0   1  397.16   17.60
   9   0   1  390.26   17.50
  10   1   1  859.11   38.40
  10   1   1  864.91   38.70
  10   1   1  861.91   38.20
  11   2   1  596.44   26.70
  11   2   1  619.34   27.10
  11   2   1  594.94   26.90
   6  -4   1   21.10    2.30
   6  -4   1   18.80    1.60
  -6   4  -1   20.20    1.60
   7  -3   1   57.69    3.20
   7  -3   1   61.69    3.50
   7  -3   1   64.29    3.80
   8  -2   1  158.68    7.60
   8  -2   1  168.68    7.90
   9  -1   1   18.00    2.10
   9  -1   1   15.60    1.50
   9  -1   1   15.20    1.40
  10   0   1    0.10    0.80
  10   0   1   -0.80    1.10
  11   1   1    3.50    1.20
   7  -4   1  180.28    8.10
   7  -4   1  176.78    8.40
   8  -3   1   15.60    1.60
   8  -3   1   16.00    2.10
   9  -2   1  952.30   43.60
   9  -2   1 1013.60   43.80
  10  -1   1  835.52   36.70
  10  -1   1  802.62   36.40
  10  -1   1  820.72   36.30
  11   0   1   82.99    4.20
  11   0   1   87.19    4.60
  12   1   1   91.79    4.50
  12   1   1   83.29    4.40
   8  -4   1    7.80    0.90
   8  -4   1    8.90    0.80
   9  -3   1   43.60    2.70
  10  -2   1   55.29    3.30
  10  -2   1   54.69    2.90
  11  -1   1    3.10    1.40
  12   0   1    3.70    0.70
  10  -3   1   12.10    1.30
  11  -2   1  567.54   25.00
  11  -2   1  558.34   25.30
  12  -1   1   80.29    4.00
  12  -1   1   78.69    3.70
  12  -1  -2   67.39    3.40
  11  -2  -2  109.69    5.10
  11  -2  -2  103.69    4.90
  10  -3  -2    2.20    1.00
  12   0  -2  210.18    9.40
  12   0  -2  205.58    9.60
  11  -1  -2  130.09    5.80
  11  -1  -2  120.69    5.90
  11  -1  -2  128.59    6.20
  10  -2  -2  235.98   10.80
  10  -2  -2  243.68   11.40
   9  -3  -2  304.07   13.70
   9  -3  -2  301.87   13.50
   9  -3  -2  298.77   13.70
   8  -4  -2   10.40    0.80
   8  -4  -2    8.60    1.10
  12   1  -2   78.49    3.70
  12   1  -2   69.89    3.70
  11   0  -2    2.80    1.20
  11   0  -2    6.40    1.00
  10  -1  -2  466.55   20.10
  10  -1  -2  495.45   20.40
  10  -1  -2  386.76   20.00
   9  -2  -2  164.28    7.80
   9  -2  -2  175.78    8.10
   8  -3  -2   94.59    4.80
   8  -3  -2   92.29    4.50
   8  -3  -2   93.79    4.50
   7  -4  -2   12.50    1.60
   7  -4  -2   13.20    1.30
   7  -4  -2   12.20    1.10
  11   1  -2  133.89    6.40
  11   1  -2  129.29    7.00
  11   1  -2  134.49    6.10
  10   0  -2   30.50    2.20
  10   0  -2   31.50    2.50
  10   0  -2   30.80    1.80
   9  -1  -2  768.22   33.90
   9  -1  -2  748.03   33.70
   8  -2  -2  419.46   18.00
   8  -2  -2  387.06   17.70
   8  -2  -2  380.56   17.70
   7  -3  -2  116.19    5.70
   7  -3  -2  108.09    5.30
   7  -3  -2  108.29    5.20
  -6   4   2  301.17   13.20
   6  -4  -2  284.67   13.20
   6  -4  -2  296.07   13.60
  11   2  -2  114.99    5.30
  11   2  -2  108.99    5.90
  11   2  -2  111.49    5.10
  10   1  -2  545.75   23.00
  10   1  -2  479.05   22.80
   9   0  -2    0.10    0.60
   9   0  -2    1.70    0.90
   9   0  -2    1.00    0.70
   8  -1  -2  344.97   15.30
   8  -1  -2  327.37   15.40
   8  -1  -2  336.57   15.60
   8  -1  -2  334.77   15.60
   8  -1  -2  338.07   15.50
   8  -1  -2  323.27   16.10
   7  -2  -2  180.68    8.80
   6  -3  -2    6.00    0.80
   6  -3  -2    6.50    0.90
   6  -3  -2    5.10    1.30
  -5   4   2   13.10    1.30
   5  -4  -2   13.50    1.60
   5  -4  -2   16.20    1.40
   5  -4  -2   10.60    1.10
   5  -4  -2   11.80    1.20
  -4   5   2  101.49    5.00
   4  -5  -2  113.19    4.90
   4  -5  -2  107.59    5.10
  10   2  -2  264.37   11.90
  10   2  -2  261.47   12.40
  10   2  -2  264.67   12.00
   9   1  -2  747.93   34.90
   9   1  -2  803.62   34.50
   9   1  -2  781.02   34.70
   8   0  -2  811.92   34.30
   8   0  -2  778.42   34.40
   8   0  -2  696.03   34.60
   8   0  -2  803.92   34.70
   8   0  -2  726.93   34.20
   7  -1  -2  312.87   13.90
   7  -1  -2  304.77   13.80
   7  -1  -2  291.87   14.40
   7  -1  -2  299.57   14.10
   7  -1  -2  303.17   14.10
   6  -2  -2  348.57   15.70
   6  -2  -2  329.27   16.10
   5  -3  -2   35.00    4.00
   5  -3  -2   32.70    2.70
   5  -3  -2   26.60    2.30
  -4   4   2  288.57   13.40
   4  -4  -2  284.37   13.30
   4  -4  -2  304.97   13.40
   4  -4  -2  308.27   13.30
  -3   5   2  748.33   35.50
   3  -5  -2  842.82   35.50
   3  -5  -2  805.92   35.40
 -10  -3   2    0.90    0.40
  10   3  -2    2.40    0.80
   9   2  -2  191.78    9.40
   9   2  -2  185.48    9.00
   7   0  -2    0.30    0.60
   7   0  -2   -0.50    0.70
   7   0  -2    0.50    0.80
   7   0  -2   -0.20    1.00
   7   0  -2    0.30    0.60
   7   0  -2   -0.10    0.60
   6  -1  -2   28.00    2.80
   6  -1  -2   30.20    2.00
   6  -1  -2   28.90    1.90
   6  -1  -2   31.20    2.10
   6  -1  -2   29.80    2.10
   5  -2  -2   75.19    4.60
   5  -2  -2   73.29    4.00
   5  -2  -2   72.69    3.90
   4  -3  -2  176.38    9.20
   4  -3  -2  170.18    8.40
   4  -3  -2  172.88    8.30
  -3   4   2  194.78    9.40
   3  -4  -2  210.28    9.20
   3  -4  -2  204.48    9.30
  -2   5   2    3.50    0.70
   2  -5  -2    4.70    0.70
  -9  -3   2  319.97   14.40
   9   3  -2  312.37   14.20
   9   3  -2  312.97   14.40
   9   3  -2  344.87   14.60
   9   3  -2  309.07   14.20
   8   2  -2  425.26   19.10
   8   2  -2  451.75   19.10
   8   2  -2  418.06   19.30
   8   2  -2  422.76   19.60
   8   2  -2  423.56   19.20
   7   1  -2  315.27   14.80
   7   1  -2  322.87   14.40
   7   1  -2  302.97   14.40
   6   0  -2   16.90    1.70
   6   0  -2   16.90    1.40
   6   0  -2   17.30    1.40
   6   0  -2   19.40    1.70
   6   0  -2   19.60    1.50
   6   0  -2   23.80    2.40
   5  -1  -2 1912.21   86.39
   5  -1  -2 1901.81   86.19
   5  -1  -2 1951.90   86.19
   5  -1  -2 1962.80   86.19
   5  -1  -2 1959.90   86.09
   5  -1  -2 1986.10   85.99
   4  -2  -2  302.97   14.50
   4  -2  -2  312.87   14.00
   4  -2  -2  305.47   14.00
   3  -3  -2  299.67   14.60
   3  -3  -2  296.37   13.80
  -2   4   2   21.40    1.70
   2  -4  -2   22.00    1.60
   2  -4  -2   23.10    1.80
   2  -4  -2   24.80    1.80
  -1   5   2   53.59    2.70
   1  -5  -2   50.59    2.70
  -8  -3   2  109.09    5.10
   8   3  -2  105.19    4.90
   8   3  -2  100.19    5.00
   8   3  -2  106.49    5.00
   7   2  -2  186.28    9.00
   6   1  -2   29.50    2.20
   6   1  -2   30.30    2.00
   6   1  -2   28.50    1.90
   5   0  -2    0.00    0.50
   5   0  -2   -0.20    0.40
   5   0  -2   -0.30    0.40
   5   0  -2    0.50    0.40
   5   0  -2    0.10    0.50
   5   0  -2    0.10    0.80
   4  -1  -2 1531.75   68.29
   4  -1  -2 1514.05   68.39
   4  -1  -2 1541.35   68.39
   4  -1  -2 1567.94   68.29
   4  -1  -2 1615.84   68.59
   4  -1  -2 1493.35   68.39
   3  -2  -2  814.92   36.60
   3  -2  -2  843.02   36.20
   3  -2  -2  779.72   36.20
   2  -3  -2   10.70    1.30
   2  -3  -2    8.60    1.60
  -1   4   2   -0.30    0.70
   1  -4  -2    0.90    0.60
   1  -4  -2    1.40    0.80
   0   5   2   -0.20    0.60
   0  -5  -2   -0.90    0.60
  -8  -4   2    9.30    0.90
   8   4  -2   11.00    0.80
   8   4  -2   10.30    0.80
   8   4  -2    9.90    0.90
  -7  -3   2  122.09    5.70
   7   3  -2  117.89    5.60
   7   3  -2  115.99    5.70
   6   2  -2  354.96   16.40
   6   2  -2  360.76   16.10
   6   2  -2  337.57   16.00
   5   1  -2 2002.50   88.09
   5   1  -2 2026.10   87.79
   5   1  -2 1923.31   87.69
   4   0  -2  546.05   23.40
   4   0  -2  534.05   23.40
   4   0  -2  529.65   23.40
   4   0  -2  535.35   23.60
   4   0  -2  529.45   23.40
   4   0  -2  482.75   23.90
   3  -1  -2 2362.86   98.79
   3  -1  -2 2259.97   98.49
   3  -1  -2 2188.68   98.49
   3  -1  -2 2140.79   98.49
   3  -1  -2 2201.38   98.59
   2  -2  -2  724.83   32.50
   2  -2  -2  712.43   32.50
   2  -2  -2  755.62   33.20
   1  -3  -2 1595.14   70.99
   0   4   2  175.58    8.20
   0  -4  -2  174.48    8.20
   1   5   2   72.89    3.60
   1   5   2   72.59    3.50
  -1  -5  -2   72.39    3.60
  -7  -4   2   13.30    1.20
   7   4  -2   13.30    1.10
   7   4  -2   12.50    1.20
  -6  -3   2    6.80    0.90
   6   3  -2    5.70    0.80
   5   2  -2   70.39    3.70
   5   2  -2   71.39    3.80
   5   2  -2   70.79    3.90
   4   1  -2 1445.56   64.49
   4   1  -2 1422.46   64.29
   4   1  -2 1490.55   64.29
   3   0  -2    0.20    0.30
   3   0  -2    0.00    0.30
   3   0  -2    0.00    0.50
   3   0  -2    0.40    0.30
   3   0  -2    0.30    0.30
   3   0  -2    0.00    0.20
   2  -1  -2  122.79    5.70
   2  -1  -2  120.59    5.70
   2  -1  -2  127.39    5.90
   2  -1  -2  113.39    5.60
   2  -1  -2  136.99    5.70
  -1   2   2  258.47   12.30
   1  -2  -2  280.17   12.90
   1  -2  -2  279.77   12.50
   1  -2  -2  284.47   12.40
   0  -3  -2   10.70    1.70
   0  -3  -2   10.40    1.30
   1   4   2    0.40    0.70
   1   4   2    1.50    0.70
  -1  -4  -2    0.60    0.60
  -1  -4  -2    1.20    0.80
   2   5   2    0.70    0.60
   2   5   2    0.80    0.50
  -2  -5  -2    0.00    0.60
  -6  -4   2  301.87   13.50
   6   4  -2  293.17   13.40
  -5  -3   2   29.10    2.20
   5   3  -2   30.50    2.20
   5   3  -2   32.50    1.90
   4   2  -2  298.97   13.30
   4   2  -2  298.47   13.10
   4   2  -2  260.87   13.00
   3   1  -2 2167.08   97.59
   3   1  -2 2219.38   97.79
   3   1  -2 2245.08   97.69
   2   0  -2 2363.06  102.99
   2   0  -2 2288.27  102.99
   2   0  -2 2332.67  102.99
   2   0  -2 2354.56  103.09
   1  -1  -2 2958.80  133.29
   1  -1  -2 3154.58  133.09
   1  -1  -2 2937.81  133.09
   0   2   2  123.09    5.60
   0  -2  -2  125.79    6.30
  -1  -3  -2  570.44   26.10
  -1  -3  -2  560.14   25.50
   2   4   2   69.39    3.60
   2   4   2   71.79    3.60
  -2  -4  -2   67.79    3.70
  -2  -4  -2   67.69    3.50
   3   5   2  170.88    7.60
  -3  -5  -2  167.78    7.60
  -3  -5  -2  162.78    7.60
  -5  -4   2   11.80    1.10
   5   4  -2   12.00    1.30
  -4  -3   2  147.09    8.80
   4   3  -2  188.28    8.10
   3   2  -2  799.02   35.70
   3   2  -2  797.52   35.60
   3   2  -2  800.02   35.60
   2   1  -2  117.49    5.40
   2   1  -2  118.09    5.50
   1   0  -2    0.00    0.20
   1   0  -2    0.20    0.10
   1   0  -2    0.00    0.10
   1   0  -2    0.00    0.30
   1   0  -2    0.00    0.20
   1   0  -2    0.10    0.10
   0   1   2 1075.29   47.40
   0  -1  -2 1074.09   47.70
   1   2   2   98.69    4.60
  -1  -2  -2  101.09    5.20
  -2  -3  -2  343.77   16.30
   3   4   2  135.59    6.30
   3   4   2  129.59    6.30
  -3  -4  -2  132.29    6.30
  -3  -4  -2  130.89    6.30
   4   5   2    6.90    0.70
  -4  -5  -2    6.20    0.70
  -4  -5  -2    5.20    0.70
  -4  -4   2  281.77   12.80
   4   4  -2  281.17   12.80
  -3  -3   2  271.97   13.50
   3   3  -2  296.47   12.70
   3   3  -2  254.57   12.80
   2   2  -2  712.33   31.50
   2   2  -2  699.83   31.40
   1   1  -2 2877.81  127.19
   1   1  -2 2889.81  127.29
   0   0   2 5070.29  236.88
   0   0  -2 5061.59  235.78
   1   1   2  277.07   12.70
  -1  -1  -2  292.87   12.90
   2   2   2   26.40    1.40
  -2  -2  -2   24.00    2.00
   3   3   2  942.61   40.80
  -3  -3  -2  869.71   41.40
   4   4   2  215.98   10.00
  -4  -4  -2  233.68   10.00
  -4  -4  -2  202.88   10.00
  -4  -5   2   96.79    4.60
  -4  -5   2   99.99    4.60
   4   5  -2  101.19    4.60
  -3  -4   2  203.78    9.80
  -3  -4   2  207.78    9.90
   3   4  -2  212.38    9.80
   3   4  -2  229.08    9.80
  -2  -3   2    9.80    1.70
   2   3  -2   10.40    1.20
   1   2  -2  266.07   12.40
   1   2  -2  284.47   12.40
   0  -1   2 1113.69   48.30
   0   1  -2 1073.19   48.30
   1   0   2    0.10    0.20
   1   0   2    0.00    0.20
   1   0   2    0.10    0.10
   2   1   2   18.60    1.10
   2   1   2   16.00    1.00
   3   2   2  129.49    5.80
   3   2   2  115.19    5.70
   3   2   2  113.59    5.50
  -3  -2  -2  127.99    6.10
   4   3   2  293.37   14.00
   5   4   2    8.40    0.90
  -5  -4  -2    8.60    1.00
  -3  -5   2  773.42   34.50
  -3  -5   2  776.82   34.60
   3   5  -2  787.02   34.60
  -2  -4   2   20.90    1.60
  -2  -4   2   23.50    1.90
   2   4  -2   22.00    1.70
   2   4  -2   21.90    1.70
  -1  -3   2 1564.74   74.09
   1   3  -2 1651.73   71.39
   0  -2   2  122.09    5.70
   0  -2   2  126.99    6.40
   1  -1   2  261.07   12.30
   1  -1   2  283.17   12.10
   1  -1   2  266.57   12.10
   2   0   2  143.29    6.40
   2   0   2  161.28    6.50
   2   0   2  138.79    6.40
   2   0   2  146.29    6.40
   2   0   2  136.29    6.50
   2   0   2  129.89    6.40
   3   1   2   69.79    3.30
   3   1   2   66.59    3.30
   3   1   2   78.19    3.50
   3   1   2   65.09    3.40
   4   2   2  604.14   28.00
   4   2   2  621.64   28.30
   4   2   2  655.73   28.20
  -4  -2  -2  624.64   51.29
   5   3   2  163.28    7.80
   5   3   2  167.68    8.50
   5   3   2  185.58    8.60
  -5  -3  -2  159.78    7.90
   6   4   2   76.09    4.00
  -6  -4  -2   77.39    4.10
  -2  -5   2    4.50    0.70
   2   5  -2    4.10    0.70
   2   5  -2    3.70    0.60
  -1  -4   2   -0.70    0.50
  -1  -4   2   -0.20    0.80
   1   4  -2    0.40    0.80
   1   4  -2    0.60    0.70
   0  -3   2    7.60    2.10
   0   3  -2    9.10    1.00
   1  -2   2   97.99    4.60
   1  -2   2   99.19    5.30
   2  -1   2   17.30    1.10
   2  -1   2   13.20    1.00
   2  -1   2   16.40    1.40
   2  -1   2   16.50    1.10
   3   0   2    0.20    0.40
   3   0   2    0.10    0.30
   3   0   2    0.00    0.30
   3   0   2    0.30    0.40
   3   0   2    0.00    0.20
   3   0   2    0.30    0.30
   4   1   2   73.99    3.70
   4   1   2   74.69    3.60
   4   1   2   74.59    3.80
   4   1   2   81.39    3.90
   5   2   2   44.00    2.60
   5   2   2   45.20    3.10
   5   2   2   50.39    2.90
   6   3   2   43.80    3.40
   6   3   2   35.90    2.20
  -6  -3  -2   38.00    2.30
   7   4   2    4.10    0.60
  -7  -4  -2    3.70    0.70
  -1  -5   2   50.49    2.70
   1   5  -2   50.39    2.70
   1   5  -2   52.49    2.60
   0  -4   2  192.68    8.80
   0   4  -2  181.78    8.70
   1  -3   2  577.24   25.60
   1  -3   2  552.54   24.70
  -1   3  -2  515.65   24.60
   2  -2   2   22.80    1.50
   2  -2   2   25.60    2.30
   2  -2   2   25.00    1.70
   3  -1   2   65.49    3.10
   3  -1   2   65.79    3.20
   3  -1   2   61.79    3.50
   3  -1   2   71.39    3.30
   4   0   2   66.59    3.40
   4   0   2   70.99    3.40
   4   0   2   61.49    3.40
   4   0   2   70.39    3.30
   4   0   2   68.39    3.30
   4   0   2   70.09    3.20
   5   1   2  637.74   27.50
   5   1   2  624.44   27.60
   5   1   2  601.04   27.70
   5   1   2  598.54   27.40
   6   2   2  122.49    6.30
   6   2   2  119.69    6.30
   6   2   2  126.89    6.10
   7   3   2   67.59    3.50
   7   3   2   76.79    4.70
  -7  -3  -2   66.59    3.80
   8   4   2  122.69    5.60
   8   4   2  121.99    5.60
  -8  -4  -2  123.59    5.70
   0  -5   2    0.10    0.60
   0   5  -2    0.70    0.70
   1  -4   2    1.30    0.80
  -1   4  -2    1.30    0.80
   2  -3   2  368.36   16.50
   2  -3   2  370.06   17.50
   2  -3   2  352.86   16.60
   3  -2   2  115.99    5.60
   3  -2   2  104.89    5.50
   3  -2   2  123.29    5.70
   3  -2   2  119.69    6.10
   4  -1   2   74.39    3.80
   4  -1   2   77.29    4.10
   4  -1   2   71.69    3.70
   4  -1   2   81.79    3.60
   4  -1   2   78.79    3.80
   5   0   2    0.00    0.60
   5   0   2    0.20    0.40
   5   0   2   -0.50    0.50
   5   0   2    0.30    0.50
   5   0   2    0.60    0.50
   5   0   2    0.60    0.50
   6   1   2  374.76   17.40
   6   1   2  386.66   17.20
   6   1   2  381.66   17.30
   6   1   2  371.86   17.00
   7   2   2    8.10    1.40
   7   2   2    5.40    1.00
   8   3   2  151.18    7.20
   8   3   2  153.08    7.60
   8   3   2  165.88    8.00
  -8  -3  -2  156.48    7.30
   1  -5   2   71.69    3.50
  -1   5  -2   69.39    3.50
   2  -4   2   71.89    3.70
  -2   4  -2   70.89    3.70
   3  -3   2  951.10   42.80
   3  -3   2  925.71   41.90
   4  -2   2  620.94   27.60
   4  -2   2  604.14   27.90
   4  -2   2  609.44   27.70
   4  -2   2  638.24   28.20
   5  -1   2  597.94   26.90
   5  -1   2  591.44   27.00
   5  -1   2  617.24   27.00
   5  -1   2  595.34   27.10
   5  -1   2  606.64   26.70
   6   0   2  552.44   24.50
   6   0   2  548.55   24.30
   6   0   2  557.14   24.30
   6   0   2  573.14   24.40
   6   0   2  477.85   24.30
   7   1   2  556.74   26.10
   7   1   2  574.74   25.90
   7   1   2  586.84   25.90
   8   2   2  155.08    7.30
   8   2   2  134.19    6.50
   8   2   2  136.89    6.70
  -8  -2  -2  140.49    6.60
   9   3   2  153.98    7.20
   9   3   2  164.18    7.40
   9   3   2  171.98    8.00
   9   3   2  160.98    7.40
  -9  -3  -2  158.68    7.50
   2  -5   2    0.20    0.60
  -2   5  -2    0.00    0.70
   3  -4   2  147.29    6.50
  -3   4  -2  128.29    6.50
   4  -3   2  299.67   14.70
   4  -3   2  293.67   13.70
   5  -2   2   54.99    3.60
   5  -2   2   45.10    2.70
   5  -2   2   47.80    2.90
   5  -2   2   49.40    3.10
   6  -1   2  370.96   16.50
   6  -1   2  360.66   16.40
   6  -1   2  359.96   16.50
   6  -1   2  354.66   16.20
   6  -1   2  357.06   16.70
   7   0   2   -0.20    0.80
   7   0   2    0.80    0.70
   7   0   2    0.10    0.80
   7   0   2    0.30    0.80
   8   1   2    2.80    1.20
   8   1   2    4.00    1.30
   8   1   2    5.30    1.00
   9   2   2   16.50    1.60
   9   2   2   17.10    2.00
   9   2   2   23.40    1.60
  -9  -2  -2   16.50    1.40
  10   3   2   31.60    1.60
 -10  -3  -2   31.50    1.70
   3  -5   2  183.68    8.70
   3  -5   2  207.18    9.40
   4  -4   2  236.58   10.40
   4  -4   2  239.58   10.50
  -4   4  -2  218.18   10.60
   5  -3   2  174.78    8.00
   6  -2   2  113.99    5.90
   6  -2   2  117.49    6.10
   6  -2   2  119.19    6.40
   7  -1   2  572.44   24.90
   7  -1   2  507.55   25.00
   7  -1   2  551.24   24.90
   7  -1   2  562.34   24.80
   8   0   2  342.67   15.50
   8   0   2  334.27   15.60
   8   0   2  315.47   15.20
   8   0   2  332.37   15.30
   9   1   2   13.20    1.30
   9   1   2   13.00    1.70
  10   2   2   14.60    1.80
  10   2   2   15.80    1.20
  10   2   2   12.00    1.50
   4  -5   2    4.40    0.90
   4  -5   2    5.60    0.50
  -4   5  -2    7.00    0.80
   5  -4   2    7.80    0.80
   5  -4   2    6.90    1.50
   5  -4   2    8.10    0.90
  -5   4  -2    9.50    1.00
   6  -3   2   38.30    2.10
   6  -3   2   33.30    2.20
   6  -3   2   38.90    3.00
   7  -2   2    7.30    1.40
   7  -2   2    6.30    1.60
   7  -2   2    6.80    1.30
   8  -1   2    5.10    1.30
   8  -1   2    3.60    1.40
   9   0   2   -1.40    0.70
   9   0   2   -1.40    1.20
  10   1   2    2.50    1.30
  10   1   2    3.70    0.90
  11   2   2    2.00    0.70
  11   2   2    2.70    1.00
  11   2   2    1.20    0.50
   6  -4   2   75.69    4.50
  -6   4  -2   78.79    3.80
   7  -3   2   65.49    3.50
   7  -3   2   65.39    4.30
   8  -2   2  133.79    6.40
   8  -2   2  139.39    6.70
   9  -1   2   14.60    1.60
   9  -1   2   16.00    1.50
   9  -1   2   12.80    1.30
  10   0   2  113.39    5.40
  11   1   2   88.39    4.40
  11   1   2   90.39    5.30
   7  -4   2    3.70    1.00
   7  -4   2    3.80    0.70
  -7   4  -2    2.70    0.70
   8  -3   2  147.39    7.20
   8  -3   2  146.89    6.80
   9  -2   2   16.50    2.10
  10  -1   2    2.20    0.70
  10  -1   2    2.20    1.20
  11   0   2   -0.40    0.70
  11   0   2    1.30    0.60
  11   0   2   -0.40    1.00
   8  -4   2  118.29    5.40
   8  -4   2  116.29    5.50
   9  -3   2  151.18    7.20
   9  -3   2  149.69    7.00
  10  -2   2   13.20    1.10
  10  -2   2   13.20    1.80
  11  -1   2   92.49    4.30
  11  -1   2   89.29    4.30
  11  -1   2   84.19    5.50
  12   0   2  158.88    7.80
  10  -3   2   35.40    2.00
  10  -3   2   32.60    2.10
  11  -2   2    2.10    0.70
  11  -2   2    1.70    0.90
  11  -2  -3  144.89    6.80
  11  -2  -3  142.49    6.70
  10  -3  -3   23.90    1.80
  12   0  -3   78.09    3.60
  12   0  -3   67.19    3.60
  11  -1  -3   79.49    3.80
  11  -1  -3   63.89    3.40
   9  -3  -3    0.60    0.70
   9  -3  -3    0.80    0.60
   8  -4  -3   41.40    2.20
   8  -4  -3   43.40    2.20
  12   1  -3    9.90    1.20
  12   1  -3   13.40    1.20
  12   1  -3   11.70    0.90
  11   0  -3  124.69    5.80
  11   0  -3  122.69    6.10
  11   0  -3  118.99    5.70
  10  -1  -3   30.50    1.90
   9  -2  -3  431.96   18.70
   9  -2  -3  394.86   18.50
   9  -2  -3  412.06   18.50
   8  -3  -3   36.30    2.40
   8  -3  -3   36.90    2.20
   8  -3  -3   36.80    2.10
   7  -4  -3  354.96   16.50
   7  -4  -3  362.86   16.20
   7  -4  -3  372.66   16.20
  11   1  -3   75.49    4.00
  11   1  -3   71.09    3.70
  10   0  -3    0.90    0.70
   9  -1  -3  356.76   15.70
   9  -1  -3  342.77   15.70
   8  -2  -3   74.19    3.80
   8  -2  -3   68.39    3.50
   8  -2  -3   69.29    3.50
   7  -3  -3    5.10    0.80
   7  -3  -3    3.90    0.90
   7  -3  -3    3.60    1.10
  -6   4   3    4.40    0.70
   6  -4  -3    3.90    1.30
   6  -4  -3    5.30    0.90
  11   2  -3  162.68    7.30
  11   2  -3  156.68    7.50
  11   2  -3  164.28    7.40
   9   0  -3  375.96   16.30
   9   0  -3  366.86   16.50
   9   0  -3  348.97   16.60
   8  -1  -3  858.91   38.40
   8  -1  -3  870.21   38.40
   8  -1  -3  862.21   38.70
   8  -1  -3  861.21   38.60
   8  -1  -3  841.72   39.10
   8  -1  -3  849.52   38.50
   7  -2  -3  166.88    9.50
   7  -2  -3  191.18    8.80
   6  -3  -3   16.60    2.00
   6  -3  -3   16.30    1.30
   6  -3  -3   17.20    1.50
  -5   4   3  604.54   26.90
   5  -4  -3  605.14   27.10
   5  -4  -3  576.84   26.90
   5  -4  -3  636.44   26.80
   5  -4  -3  592.44   26.70
  -4   5   3   68.09    3.20
   4  -5  -3   63.19    3.30
   4  -5  -3   67.39    3.10
   9   1  -3  433.96   19.30
   9   1  -3  382.86   19.10
   9   1  -3  399.66   19.10
   9   1  -3  493.75   19.50
   8   0  -3   -0.70    0.80
   8   0  -3    0.40    0.90
   8   0  -3    0.70    0.90
   8   0  -3   -0.20    0.70
   7  -1  -3   77.79    4.10
   7  -1  -3   71.59    4.00
   7  -1  -3   78.69    4.50
   7  -1  -3   78.69    4.20
   7  -1  -3   77.89    4.20
   6  -2  -3   10.60    1.40
   6  -2  -3    8.40    1.20
   6  -2  -3    8.90    1.70
   5  -3  -3    1.80    0.80
   5  -3  -3    1.50    0.70
   5  -3  -3    2.20    1.10
  -4   4   3   26.40    1.80
   4  -4  -3   23.80    1.70
   4  -4  -3   28.60    1.80
   4  -4  -3   24.90    2.00
  -3   5   3  186.48    9.00
   3  -5  -3  197.58    9.00
   3  -5  -3  192.98    8.80
   3  -5  -3  204.28    8.80
 -10  -3   3   27.50    1.50
  10   3  -3   29.00    1.60
   9   2  -3  427.76   21.00
   9   2  -3  472.95   20.90
   9   2  -3  477.55   20.50
   9   2  -3  452.35   20.40
   8   1  -3  892.71   38.70
   8   1  -3  775.52   38.10
   7   0  -3  244.68   11.50
   7   0  -3  248.98   11.50
   7   0  -3  253.17   11.50
   7   0  -3  239.38   12.10
   7   0  -3  250.67   11.40
   7   0  -3  254.97   11.90
   6  -1  -3  421.36   19.10
   6  -1  -3  407.76   19.60
   6  -1  -3  432.86   19.40
   6  -1  -3  428.06   19.20
   6  -1  -3  427.76   19.10
   6  -1  -3  429.96   19.30
   5  -2  -3  436.56   20.20
   5  -2  -3  445.76   20.60
   5  -2  -3  452.35   20.10
   4  -3  -3  333.97   15.40
   4  -3  -3  335.67   16.20
  -3   4   3   11.30    1.20
   3  -4  -3   12.10    1.20
   3  -4  -3   10.80    1.10
   3  -4  -3   13.40    1.10
  -2   5   3  171.68    7.80
   2  -5  -3  167.18    7.70
  -9  -3   3    0.70    0.60
   9   3  -3   -1.90    1.10
   9   3  -3   -0.20    0.50
   9   3  -3    0.30    0.60
   8   2  -3   80.79    3.90
   8   2  -3   81.49    4.50
   8   2  -3   84.09    4.00
   8   2  -3   79.79    4.10
   8   2  -3   78.89    3.80
   7   1  -3   81.69    4.10
   7   1  -3   75.29    4.00
   7   1  -3   74.89    4.40
   6   0  -3   -1.00    0.70
   6   0  -3    0.20    0.50
   6   0  -3    0.40    0.70
   6   0  -3    0.60    0.70
   6   0  -3   -0.10    0.50
   5  -1  -3  367.86   16.70
   5  -1  -3  368.16   16.60
   5  -1  -3  379.76   16.60
   5  -1  -3  360.86   16.70
   4  -2  -3  224.28   10.20
   4  -2  -3  212.58   10.20
   4  -2  -3  225.48   10.80
   3  -3  -3   78.79    5.10
   3  -3  -3   75.09    4.20
  -2   4   3   82.79    4.40
   2  -4  -3   83.19    4.20
   2  -4  -3   95.79    4.40
   2  -4  -3   92.89    4.40
  -1   5   3   66.09    3.30
   1  -5  -3   64.39    3.30
  -8  -3   3   45.90    2.50
   8   3  -3   42.00    2.20
   8   3  -3   40.50    2.40
   8   3  -3   44.00    2.40
   7   2  -3  206.58    9.80
   7   2  -3  200.28   10.30
   6   1  -3  436.36   19.60
   6   1  -3  423.16   19.40
   6   1  -3  438.26   19.90
   5   0  -3  156.08    7.30
   5   0  -3  156.48    7.30
   5   0  -3  158.88    7.30
   5   0  -3  160.78    7.50
   5   0  -3  155.28    7.30
   5   0  -3  160.88    7.80
   4  -1  -3  284.27   13.50
   4  -1  -3  280.77   13.50
   4  -1  -3  293.17   13.50
   4  -1  -3  301.97   13.40
   4  -1  -3  315.67   13.50
   4  -1  -3  317.57   13.80
   3  -2  -3  919.91   42.00
   3  -2  -3  963.90   42.10
   3  -2  -3  952.10   42.50
   2  -3  -3  256.97   12.50
   2  -3  -3  249.78   11.80
  -1   4   3   98.09    4.70
   1  -4  -3  101.09    4.80
   1  -4  -3   88.59    4.50
   0   5   3   11.90    1.30
   0  -5  -3   13.70    1.30
  -8  -4   3   48.80    2.40
   8   4  -3   45.90    2.30
   8   4  -3   46.30    2.30
   8   4  -3   46.10    2.30
  -7  -3   3    4.70    0.90
   7   3  -3    4.00    0.70
   7   3  -3    4.50    0.90
   6   2  -3   10.00    1.40
   6   2  -3   11.50    1.20
   5   1  -3  371.56   16.50
   5   1  -3  357.26   16.40
   5   1  -3  369.36   16.80
   4   0  -3   -0.50    0.30
   4   0  -3   -0.40    0.40
   4   0  -3    0.10    0.40
   4   0  -3    0.10    0.30
   4   0  -3    0.50    0.70
   4   0  -3    0.20    0.30
   3  -1  -3  561.04   23.10
   3  -1  -3  508.55   22.90
   3  -1  -3  476.75   22.90
   3  -1  -3  533.85   22.80
   3  -1  -3  483.15   22.90
   3  -1  -3  518.75   22.90
   2  -2  -3  640.44   28.80
   2  -2  -3  648.94   29.20
   1  -3  -3   86.89    4.60
   1  -3  -3   83.09    6.40
   0   4   3   13.70    1.40
   0  -4  -3   12.60    1.20
   1   5   3   21.30    1.50
   1   5   3   19.30    1.40
  -1  -5  -3   21.00    1.50
  -7  -4   3  400.26   17.80
   7   4  -3  396.46   17.70
   7   4  -3  394.56   17.70
  -6  -3   3   18.20    1.50
   6   3  -3   17.20    1.40
   5   2  -3  445.46   19.50
   5   2  -3  399.76   19.30
   5   2  -3  443.76   19.70
   4   1  -3  280.27   12.80
   4   1  -3  270.77   12.60
   4   1  -3  296.47   13.00
   3   0  -3  140.59    6.40
   3   0  -3  141.19    6.40
   3   0  -3  144.39    6.40
   3   0  -3  146.69    6.60
   3   0  -3  133.19    6.40
   2  -1  -3 1775.72   86.49
   2  -1  -3 2063.29   86.69
   2  -1  -3 2031.20   86.49
   2  -1  -3 1965.40   86.49
   1  -2  -3  365.96   17.00
   1  -2  -3  374.06   16.70
   0  -3  -3  493.85   22.40
   0  -3  -3  493.85   22.90
   1   4   3 1419.26   63.09
   1   4   3 1498.25   63.19
  -1  -4  -3 1356.16   62.99
  -1  -4  -3 1421.66   63.09
   2   5   3   83.19    3.90
   2   5   3   81.89    3.80
  -2  -5  -3   75.99    4.10
  -6  -4   3    4.00    0.90
   6   4  -3    3.50    0.70
  -5  -3   3   -0.90    1.20
  -5  -3   3    4.10    0.70
   5   3  -3    2.00    0.60
   5   3  -3    2.70    0.80
   4   2  -3  199.28    9.30
   4   2  -3  185.78    9.10
   4   2  -3  205.28    9.20
   3   1  -3  464.45   21.30
   3   1  -3  491.35   21.40
   3   1  -3  484.25   21.60
   2   0  -3    0.00    0.30
   2   0  -3    0.40    0.20
   2   0  -3    0.50    0.20
   2   0  -3    0.40    0.50
   2   0  -3    0.10    0.30
   2   0  -3    0.50    0.30
   1  -1  -3  975.00   48.70
   1  -1  -3 1119.49   48.80
   1  -1  -3 1133.99   49.00
   1  -1  -3 1185.48   48.80
   0  -2  -3 2418.46  106.69
   0  -2  -3 2407.56  106.99
  -1  -3  -3  355.16   16.20
  -1  -3  -3  348.97   16.60
   2   4   3   81.59    4.20
   2   4   3   84.49    4.30
  -2  -4  -3   87.89    4.30
  -2  -4  -3   85.69    4.20
   3   5   3   16.50    1.20
  -3  -5  -3   12.80    1.10
  -3  -5  -3   16.10    1.20
  -5  -4   3  604.74   26.80
   5   4  -3  595.74   26.80
  -4  -3   3  273.57   14.40
   4   3  -3  313.27   13.60
   3   2  -3  845.92   38.60
   3   2  -3  847.92   38.60
   3   2  -3  907.81   38.70
   2   1  -3 1807.22   80.79
   2   1  -3 1844.72   80.69
   1   0  -3   78.79    3.60
   1   0  -3   81.29    3.70
   1   0  -3   79.59    3.60
   0   1   3 4302.67  217.98
   0  -1  -3 4011.00  219.08
   1   2   3   78.49    3.70
  -1  -2  -3   83.19    4.30
  -2  -3  -3  450.95   20.90
   3   4   3  403.26   18.00
  -3  -4  -3  385.36   18.10
  -3  -4  -3  397.36   18.20
   4   5   3   24.00    1.40
  -4  -5  -3   23.70    1.40
  -4  -5  -3   22.90    1.30
  -4  -4   3   23.90    1.70
   4   4  -3   24.50    1.70
  -3  -3   3   66.29    4.60
   3   3  -3   59.69    3.80
   3   3  -3   75.59    3.70
   2   2  -3  601.34   27.40
   2   2  -3  623.14   27.30
   1   1  -3 1124.09   49.80
   0   0   3   -0.10    0.20
   0   0  -3    0.00    0.10
   0   0  -3    0.00    0.30
  -1  -1  -3 4122.59  181.88
   2   2   3   49.40    2.50
  -2  -2  -3   50.89    3.00
   3   3   3   89.99    5.10
   4   4   3   53.59    2.90
  -4  -4  -3   50.19    2.90
  -4  -4  -3   58.09    3.00
  -4  -5   3   59.29    3.00
  -4  -5   3   63.59    2.90
   4   5  -3   59.99    2.90
   4   5  -3   61.69    3.00
  -3  -4   3   10.50    1.00
  -3  -4   3   10.90    1.10
   3   4  -3   12.30    1.20
   3   4  -3   10.20    1.10
  -2  -3   3  240.38   12.40
   2   3  -3  254.77   11.50
   1   2  -3  336.67   16.00
   1   2  -3  376.26   16.00
   0   1  -3 3756.12  165.78
   1   0   3 6237.58  308.57
  -1   0  -3 6778.42  308.47
   2   1   3 2700.63  117.59
   2   1   3 2752.42  117.69
  -2  -1  -3 2543.15  117.69
   3   2   3  138.19    6.60
   3   2   3  158.68    7.10
  -3  -2  -3  135.99    6.90
   4   3   3 1385.46   62.09
   5   4   3   42.40    2.40
  -5  -4  -3   45.10    2.50
  -3  -5   3  181.98    8.50
  -3  -5   3  190.08    8.40
   3   5  -3  191.28    8.50
  -2  -4   3   88.89    4.60
  -2  -4   3   97.69    4.80
   2   4  -3   99.99    4.80
   2   4  -3  100.99    4.70
  -1  -3   3   86.19    5.40
   1   3  -3   87.59    4.40
   0  -2   3 2350.66  105.59
   0  -2   3 2432.96  106.29
   1  -1   3 4065.89  221.58
  -1   1  -3 4626.14  222.98
   2   0   3    0.30    0.20
   2   0   3    0.60    0.30
   2   0   3   -0.20    0.30
   3   1   3   35.20    1.90
   3   1   3   42.00    2.30
   3   1   3   38.40    1.90
   3   1   3   37.30    2.10
   4   2   3   84.19    4.10
   4   2   3   84.49    4.60
   5   3   3  107.99    5.20
   5   3   3  107.99    6.00
  -5  -3  -3  110.89    5.30
   6   4   3    0.30    0.60
  -6  -4  -3    1.60    0.70
  -2  -5   3  154.98    7.70
   2   5  -3  166.58    7.50
   2   5  -3  173.18    7.60
  -1  -4   3  101.39    5.10
  -1  -4   3  112.69    5.30
   1   4  -3  110.49    5.30
   1   4  -3  108.29    5.30
   0  -3   3  477.85   22.20
   0   3  -3  461.45   21.20
   1  -2   3   76.99    4.00
   1  -2   3   93.89    5.40
   2  -1   3 2886.41  118.69
   2  -1   3 2730.03  118.59
   2  -1   3 2443.96  118.79
   3   0   3  985.10   48.20
   3   0   3 1161.68   48.30
   3   0   3 1103.39   48.20
   3   0   3 1113.79   48.20
   3   0   3 1085.99   48.30
   4   1   3  817.02   37.40
   4   1   3  896.71   37.60
   4   1   3  850.21   37.40
   4   1   3  809.02   37.60
   5   2   3   95.39    4.60
   5   2   3   91.79    5.10
   6   3   3  401.06   19.40
   6   3   3  413.86   18.70
  -6  -3  -3  433.06   18.80
   7   4   3  245.18   11.10
  -7  -4  -3  246.88   11.20
  -1  -5   3   65.79    3.40
   1   5  -3   69.39    3.30
   1   5  -3   67.79    3.40
   0  -4   3   11.90    1.20
   0   4  -3   12.30    1.20
   1  -3   3  364.76   17.00
   1  -3   3  340.97   16.00
   1  -3   3  352.26   15.80
  -1   3  -3  340.67   15.90
   2  -2   3   46.40    2.50
   2  -2   3   45.20    2.50
   2  -2   3   46.40    3.20
   3  -1   3   37.80    2.10
   3  -1   3   38.20    2.00
   3  -1   3   35.30    2.30
   3  -1   3   37.30    1.80
   4   0   3    0.00    0.40
   4   0   3   -0.10    0.40
   4   0   3   -0.30    0.30
   4   0   3   -0.20    0.40
   4   0   3    0.00    0.40
   5   1   3   26.30    1.60
   5   1   3   28.30    2.00
   5   1   3   28.70    1.80
   5   1   3   28.90    2.00
   6   2   3    2.00    1.10
   6   2   3    1.10    0.70
   7   3   3   38.90    2.40
   7   3   3   43.20    4.20
  -7  -3  -3   37.60    2.50
   8   4   3   19.60    1.30
   8   4   3   22.10    1.20
  -8  -4  -3   21.40    1.30
   0  -5   3   14.80    1.30
   0   5  -3   14.10    1.40
   1  -4   3 1605.34   69.39
  -1   4  -3 1529.65   69.39
   2  -3   3  444.26   21.60
   2  -3   3  494.65   22.60
   2  -3   3  498.85   21.60
   3  -2   3  141.29    6.70
   3  -2   3  158.48    7.40
   3  -2   3  124.89    6.60
   3  -2   3  146.49    6.90
   4  -1   3  887.51   37.60
   4  -1   3  810.52   37.60
   4  -1   3  835.92   37.80
   5   0   3 1408.96   59.89
   5   0   3 1364.96   60.09
   5   0   3 1420.76   59.99
   5   0   3 1401.86   59.89
   5   0   3 1163.38   59.89
   6   1   3  624.94   28.60
   6   1   3  649.93   28.70
   6   1   3  645.84   28.80
   7   2   3   12.90    1.60
   7   2   3   16.00    2.50
   7   2   3   14.30    1.60
   8   3   3   93.79    5.40
   8   3   3  121.69    6.10
   8   3   3  109.79    5.10
  -8  -3  -3  114.69    5.30
   1  -5   3   21.20    1.50
  -1   5  -3   19.80    1.60
   2  -4   3   92.19    4.40
  -2   4  -3   83.29    4.30
   3  -3   3   87.09    5.80
   3  -3   3   90.09    4.70
   3  -3   3   96.09    4.80
   4  -2   3   88.69    4.60
   4  -2   3   86.49    4.20
   4  -2   3   91.69    5.10
   4  -2   3   82.99    4.40
   5  -1   3   29.20    1.80
   5  -1   3   24.20    2.10
   5  -1   3   27.10    1.50
   5  -1   3   26.00    1.90
   5  -1   3   26.90    1.70
   6   0   3   -0.70    0.60
   6   0   3    0.60    0.60
   6   0   3   -0.30    0.60
   6   0   3    1.00    0.70
   7   1   3   21.00    2.00
   7   1   3   19.30    2.00
   7   1   3   21.80    1.90
   8   2   3    0.00    0.70
   8   2   3    3.50    1.40
   8   2   3    1.40    0.50
  -8  -2  -3    3.60    0.70
   9   3   3    6.30    0.70
   9   3   3    6.30    0.80
   9   3   3    6.20    1.30
  -9  -3  -3    6.00    0.80
   2  -5   3   84.59    3.90
  -2   5  -3   78.29    3.90
   3  -4   3  448.66   19.10
  -3   4  -3  399.96   19.20
   4  -3   3 1398.86   62.29
   5  -2   3  103.49    5.60
   5  -2   3   96.49    5.60
   6  -1   3  622.64   28.20
   6  -1   3  628.54   28.30
   6  -1   3  633.44   28.40
   7   0   3   81.59    4.20
   7   0   3   81.69    4.50
   7   0   3   78.89    4.30
   7   0   3   76.69    4.10
   8   1   3  435.36   19.90
   8   1   3  432.06   20.00
   9   2   3  503.05   22.00
   9   2   3  483.65   21.30
   9   2   3  467.45   21.50
  -9  -2  -3  458.75   21.40
  10   3   3   78.89    3.70
  10   3   3   81.19    3.60
 -10  -3  -3   76.59    3.70
   3  -5   3   17.40    1.90
   3  -5   3   16.90    1.20
  -3   5  -3   16.40    1.40
   4  -4   3   58.29    2.90
   4  -4   3   57.19    3.00
  -4   4  -3   58.79    3.10
   5  -3   3  114.89    6.10
   5  -3   3  126.99    5.60
   5  -3   3  115.99    5.50
   6  -2   3    1.80    1.00
   6  -2   3    1.00    1.00
   6  -2   3    4.20    1.10
   7  -1   3   18.80    2.00
   7  -1   3   20.80    2.00
   8   0   3    0.40    1.00
   8   0   3   -1.60    0.70
   8   0   3   -0.80    0.80
   9   1   3   -0.20    1.10
   9   1   3    2.60    0.80
  10   2   3  169.88    7.40
  10   2   3  155.38    7.70
   4  -5   3   23.20    1.70
   4  -5   3   23.00    1.20
  -4   5  -3   22.40    1.50
   5  -4   3   41.90    2.30
   5  -4   3   41.70    3.20
   5  -4   3   49.70    2.50
  -5   4  -3   43.70    2.60
   6  -3   3  444.26   20.30
   6  -3   3  445.26   19.90
   7  -2   3   12.90    1.60
   7  -2   3   24.20    3.00
   7  -2   3    8.30    1.70
   7  -2   3   13.00    1.80
   8  -1   3  412.36   18.90
   8  -1   3  405.86   19.00
   9   0   3   14.90    1.60
   9   0   3   13.20    1.40
   9   0   3   10.20    1.30
  10   1   3  296.67   13.70
  10   1   3  288.67   13.30
  11   2   3   28.70    1.90
  11   2   3   29.00    2.20
   6  -4   3    2.40    1.20
   6  -4   3    0.90    0.70
  -6   4  -3    0.60    0.70
   7  -3   3   38.10    3.50
   7  -3   3   38.00    3.10
   8  -2   3    2.00    1.10
   8  -2   3    2.30    0.90
   9  -1   3    2.20    1.10
   9  -1   3    1.50    0.70
   9  -1   3    2.00    0.80
  10   0   3   -1.20    0.70
  10   0   3   -0.70    0.70
  10   0   3    1.20    1.20
  11   1   3   34.70    3.40
  11   1   3   44.80    2.90
   7  -4   3  227.78   10.50
   7  -4   3  223.48   10.20
  -7   4  -3  232.98   10.30
   8  -3   3  104.29    5.40
   8  -3   3  104.29    5.00
   9  -2   3  479.85   21.50
   9  -2   3  483.75   21.80
  10  -1   3  295.37   13.40
  10  -1   3  292.27   13.10
  10  -1   3  282.27   13.10
  11   0   3   12.80    1.30
  11   0   3   11.80    2.00
  12   1   3  314.77   14.10
  12   1   3  312.37   14.30
   8  -4   3   21.40    1.30
   8  -4   3   19.90    1.60
   9  -3   3    6.80    0.90
   9  -3   3    6.00    1.10
  10  -2   3  177.48    8.70
  11  -1   3   36.30    2.10
  11  -1   3   40.50    2.90
  12   0   3    0.10    0.60
  12   0   3    1.60    1.20
  10  -3   3   78.69    3.80
  10  -3   3   81.89    4.00
  11  -2   3   27.80    1.80
  11  -2   3   28.80    2.40
  12  -1   3  325.87   14.30
  12  -1   3  313.97   14.50
  11  -2  -4  158.48    7.20
  10  -3  -4   16.20    1.20
  10  -3  -4   14.40    1.00
  10  -2  -4  126.79    5.50
  10  -2  -4  102.49    6.00
   9  -3  -4  180.28    8.10
   9  -3  -4  182.88    8.30
   9  -3  -4  172.68    8.30
   8  -4  -4   18.40    1.20
   8  -4  -4   18.70    1.30
  12   1  -4   18.90    1.40
  12   1  -4   16.20    1.10
  10  -1  -4   32.50    1.90
  10  -1  -4   31.20    1.90
  10  -1  -4   35.30    2.00
  10  -1  -4   33.90    2.40
   9  -2  -4   26.80    1.90
   9  -2  -4   26.40    1.80
   8  -3  -4    7.60    0.90
   8  -3  -4    6.80    1.00
   8  -3  -4    6.90    0.90
   7  -4  -4    9.70    0.90
   7  -4  -4    9.00    0.90
   7  -4  -4    7.90    0.90
  11   1  -4  100.49    5.00
  10   0  -4 1971.90   87.09
  10   0  -4 1970.00   87.29
   9  -1  -4  244.88   12.20
   9  -1  -4  309.47   12.80
   9  -1  -4  268.77   12.30
   9  -1  -4  264.77   12.20
   8  -2  -4  124.79    6.20
   8  -2  -4  131.39    6.20
   8  -2  -4  141.09    6.40
   7  -3  -4   71.09    3.50
   7  -3  -4   66.99    3.60
  -6   4   4  244.18   11.20
   6  -4  -4  239.78   11.20
   6  -4  -4  239.98   11.30
   6  -4  -4  265.27   11.20
  11   2  -4  196.38    9.10
  11   2  -4  201.18    9.00
  10   1  -4   36.90    2.10
  10   1  -4   43.30    2.60
  10   1  -4   36.80    2.70
  10   1  -4   39.40    2.20
   9   0  -4   -1.30    0.60
   9   0  -4    0.80    0.60
   9   0  -4    1.10    0.80
   8  -1  -4  178.48    8.90
   8  -1  -4  171.88    8.60
   8  -1  -4  185.48    8.80
   8  -1  -4  178.98    8.60
   8  -1  -4  174.88    8.60
   8  -1  -4  186.78    9.60
   7  -2  -4   -1.50    1.30
   7  -2  -4   -1.00    1.10
   7  -2  -4   -0.30    0.90
   6  -3  -4   47.60    2.50
   6  -3  -4   47.80    2.70
   6  -3  -4   45.10    2.70
   6  -3  -4   50.89    3.00
  -5   4   4  264.47   11.80
   5  -4  -4  254.97   11.70
   5  -4  -4  269.97   11.80
   5  -4  -4  254.57   11.80
   5  -4  -4  258.87   12.00
  -4   5   4   60.59    3.00
   4  -5  -4   59.49    3.00
   4  -5  -4   62.09    2.80
  10   2  -4  124.39    7.30
  10   2  -4  148.49    6.60
  10   2  -4  145.59    6.70
  10   2  -4  148.69    6.50
   9   1  -4  291.07   13.00
   9   1  -4  280.97   13.00
   9   1  -4  278.37   13.20
   9   1  -4  304.47   13.40
   8   0  -4  284.87   13.10
   8   0  -4  287.97   13.60
   8   0  -4  279.57   13.20
   8   0  -4  281.07   13.30
   7  -1  -4   33.50    2.40
   7  -1  -4   36.50    3.50
   7  -1  -4   34.90    2.20
   7  -1  -4   36.30    2.50
   7  -1  -4   38.60    2.50
   7  -1  -4   35.10    2.30
   6  -2  -4  409.06   19.30
   6  -2  -4  408.66   18.70
   6  -2  -4  409.36   18.60
   5  -3  -4  135.99    6.20
   5  -3  -4  133.19    6.90
   5  -3  -4  129.29    6.30
  -4   4   4   42.20    2.50
   4  -4  -4   48.80    2.50
   4  -4  -4   41.00    2.40
   4  -4  -4   45.00    2.60
  -3   5   4  206.88    8.90
   3  -5  -4  195.08    8.90
   3  -5  -4  187.78    8.80
   3  -5  -4  189.08    8.70
 -10  -3   4   17.20    1.10
  10   3  -4   17.80    1.50
  10   3  -4   19.70    1.30
   9   2  -4   32.40    2.10
   9   2  -4   30.90    2.00
   9   2  -4   42.40    2.30
   8   1  -4  181.58    8.80
   8   1  -4  180.88    9.20
   7   0  -4   -0.20    0.50
   7   0  -4    0.10    0.80
   7   0  -4   -0.10    0.70
   7   0  -4    0.80    0.60
   7   0  -4    0.40    1.10
   7   0  -4    0.90    0.80
   6  -1  -4  127.09    6.70
   6  -1  -4  121.49    6.10
   6  -1  -4  127.89    6.10
   6  -1  -4  124.69    6.20
   6  -1  -4  123.29    6.00
   5  -2  -4  364.26   17.00
   5  -2  -4  327.97   15.70
   4  -3  -4   38.40    2.80
  -3   4   4    4.50    1.10
   3  -4  -4    5.40    1.10
   3  -4  -4    5.40    0.90
  -2   5   4   28.40    1.80
   2  -5  -4   28.80    1.70
  -9  -3   4  210.88    9.20
   9   3  -4  192.28    9.20
   9   3  -4  195.88    9.20
   9   3  -4  204.98    9.10
   8   2  -4  154.08    6.80
   8   2  -4  143.39    6.60
   8   2  -4  138.89    7.20
   8   2  -4  151.38    6.80
   8   2  -4  142.59    6.90
   7   1  -4   39.50    2.50
   7   1  -4   39.20    2.80
   6   0  -4  428.66   19.40
   6   0  -4  418.96   19.50
   6   0  -4  432.26   19.10
   6   0  -4  414.96   19.10
   6   0  -4  419.06   19.00
   6   0  -4  424.26   19.00
   5  -1  -4  191.48    9.00
   5  -1  -4  203.28    9.40
   5  -1  -4  199.68    9.00
   5  -1  -4  191.78    9.00
   5  -1  -4  193.48    8.80
   5  -1  -4  178.88    9.00
   4  -2  -4 2584.94  117.99
   4  -2  -4 2629.24  117.89
   4  -2  -4 2783.92  118.39
   3  -3  -4   62.59    3.70
   3  -3  -4   66.49    4.50
  -2   4   4   51.89    2.90
   2  -4  -4   50.69    2.80
   2  -4  -4   53.39    2.90
   2  -4  -4   54.89    2.90
  -1   5   4   22.60    1.60
   1  -5  -4   22.00    1.50
  -8  -3   4   10.00    1.00
   8   3  -4    7.80    0.90
   8   3  -4   10.20    1.00
   8   3  -4    7.50    0.70
   7   2  -4   -0.50    0.90
   7   2  -4    0.30    0.80
   6   1  -4  124.09    6.00
   6   1  -4  131.09    6.20
   6   1  -4  125.39    6.50
   5   0  -4    0.00    0.40
   5   0  -4    0.90    0.40
   5   0  -4    0.00    0.90
   5   0  -4   -0.10    0.40
   5   0  -4    0.30    0.60
   4  -1  -4 3318.07  155.68
   4  -1  -4 3851.51  155.98
   4  -1  -4 3434.66  155.58
   4  -1  -4 3679.33  155.68
   4  -1  -4 3449.55  155.68
   4  -1  -4 3423.16  155.88
   3  -2  -4   25.70    2.30
   3  -2  -4   22.70    1.80
   3  -2  -4   22.00    1.70
   2  -3  -4    2.30    0.90
   2  -3  -4    3.20    1.30
  -1   4   4   -0.60    0.60
   1  -4  -4    0.40    0.70
   1  -4  -4   -0.10    0.70
   0   5   4   12.00    1.30
   0  -5  -4   14.00    1.30
  -8  -4   4   22.00    1.30
   8   4  -4   20.50    1.20
   8   4  -4   18.80    1.20
   8   4  -4   21.80    1.30
  -7  -3   4   75.69    3.90
   7   3  -4   78.19    3.80
   6   2  -4  416.46   19.50
   6   2  -4  425.46   19.20
   5   1  -4  196.88    9.20
   5   1  -4  194.38    9.50
   5   1  -4  206.38    9.20
   4   0  -4  377.26   16.90
   4   0  -4  366.76   17.00
   4   0  -4  367.96   17.20
   4   0  -4  382.56   17.00
   4   0  -4  411.36   17.40
   4   0  -4  372.86   17.00
   3  -1  -4  200.28    8.90
   3  -1  -4  189.08    8.90
   3  -1  -4  189.98    8.90
   3  -1  -4  187.08    8.90
   3  -1  -4  193.18    8.80
   3  -1  -4  212.88    9.20
   2  -2  -4  605.94   27.90
   2  -2  -4  628.34   28.00
   1  -3  -4   21.70    2.10
   1  -3  -4   22.30    2.60
   0   4   4  383.76   17.10
   0  -4  -4  398.16   17.10
   0  -4  -4  353.76   16.90
   1   5   4   73.69    3.60
   1   5   4   71.19    3.60
  -1  -5  -4   75.79    3.70
  -7  -4   4   10.10    1.10
   7   4  -4    9.50    0.90
   7   4  -4    9.80    1.00
  -6  -3   4   53.59    2.90
   6   3  -4   54.59    2.90
   5   2  -4  325.77   14.70
   5   2  -4  315.37   14.90
   4   1  -4 3187.68  146.19
   4   1  -4 3382.76  146.39
   4   1  -4 3372.36  146.59
   3   0  -4    0.10    0.30
   3   0  -4    0.20    0.20
   3   0  -4   -0.10    0.40
   3   0  -4   -0.20    0.20
   3   0  -4    0.10    0.40
   3   0  -4   -0.30    0.60
   2  -1  -4  125.59    6.10
   2  -1  -4  142.69    6.40
   1  -2  -4   29.50    1.90
   1  -2  -4   27.50    2.30
   0  -3  -4   21.60    2.10
   0  -3  -4   20.80    2.60
   1   4   4    3.40    0.80
   1   4   4    2.60    0.70
  -1  -4  -4    1.00    0.80
  -1  -4  -4    2.00    0.70
   2   5   4    9.00    0.80
   2   5   4   10.80    1.10
  -2  -5  -4    8.00    0.90
  -6  -4   4  236.38   11.20
   6   4  -4  239.38   11.00
  -5  -3   4  137.39    6.50
   5   3  -4  131.49    7.40
   5   3  -4  141.99    6.50
   4   2  -4 2537.45  109.69
   4   2  -4 2558.74  109.59
   4   2  -4 2329.77  109.39
   3   1  -4  191.78    8.60
   3   1  -4  192.18    8.70
   3   1  -4  178.78    8.40
   2   0  -4 2459.35  107.89
   2   0  -4 2399.06  107.89
   2   0  -4 2460.25  107.89
   2   0  -4 2467.35  108.09
   1  -1  -4 1864.01   80.89
   1  -1  -4 1799.42   80.99
   0  -2  -4   33.40    2.40
  -1  -3  -4  745.63   32.20
  -1  -3  -4  685.83   32.50
   2   4   4   38.70    2.40
   2   4   4   35.30    2.20
  -2  -4  -4   37.00    2.40
  -2  -4  -4   37.80    2.20
   3   5   4  103.09    4.50
  -3  -5  -4   84.99    4.30
  -3  -5  -4   95.69    4.40
  -5  -4   4  263.17   11.80
   5   4  -4  257.17   11.80
   4   3  -4   37.40    2.50
   3   2  -4   22.10    1.60
   3   2  -4   22.30    1.60
   3   2  -4   20.70    1.50
   2   1  -4  128.09    5.80
   2   1  -4  117.39    5.50
   1   0  -4    0.20    0.30
   1   0  -4    0.00    0.30
   1   0  -4    0.20    0.50
   0   1   4 9999.00  469.65
   0  -1  -4 9601.84  473.85
   1   2   4   51.59    2.40
  -1  -2  -4   51.69    3.10
  -2  -3  -4    0.30    0.80
  -2  -3  -4    0.10    0.80
   3   4   4   78.19    4.00
   3   4   4   81.39    4.10
  -3  -4  -4   84.39    4.10
  -3  -4  -4   79.19    4.10
   4   5   4    1.00    0.50
  -4  -5  -4   -0.30    0.30
  -4  -5  -4    0.40    0.40
  -4  -4   4   42.20    2.40
   4   4  -4   45.10    2.50
  -3  -3   4   59.39    4.60
   3   3  -4   66.59    3.50
   2   2  -4  559.04   24.30
   2   2  -4  523.95   24.20
   1   1  -4 1654.73   73.19
   0   0   4 1709.83   74.59
   0   0  -4 1669.93   74.49
   1   1   4 6226.48  308.07
  -1  -1  -4 5922.41  312.97
   2   2   4  428.96   18.50
  -2  -2  -4  396.66   18.70
   3   3   4  489.05   22.50
   4   4   4   11.80    1.20
  -4  -4  -4   12.60    1.30
  -4  -4  -4   12.00    1.20
  -4  -5   4   55.59    2.80
  -4  -5   4   58.09    2.80
   4   5  -4   57.09    2.70
   4   5  -4   58.89    2.80
  -3  -4   4    5.60    1.00
  -3  -4   4    4.50    1.10
   3   4  -4    5.50    1.10
   3   4  -4    4.60    1.00
  -2  -3   4    3.40    1.30
   2   3  -4    3.60    0.80
   1   2  -4   25.10    1.50
   1   2  -4   25.00    1.60
   0  -1   4 7031.00  397.06
   0   1  -4 9387.56  401.16
   1   0   4   -0.10    0.30
   2   1   4   10.90    1.20
   2   1   4    8.70    0.70
   3   2   4   16.90    1.20
   3   2   4   20.30    2.10
  -3  -2  -4   18.40    1.60
   4   3   4  106.19    6.30
   5   4   4  102.89    5.10
  -5  -4  -4  107.99    5.10
  -3  -5   4  200.08    8.70
  -3  -5   4  187.18    8.80
   3   5  -4  196.18    8.80
   3   5  -4  189.58    8.70
  -2  -4   4   61.09    3.20
  -2  -4   4   53.59    3.00
   2   4  -4   56.99    3.10
   2   4  -4   59.19    3.20
  -1  -3   4   21.70    3.00
   1   3  -4   23.70    1.70
   0  -2   4   31.90    1.60
   0   2  -4   26.50    1.60
   1  -1   4 4677.03  263.17
  -1   1  -4 5812.82  267.47
  -2   0  -4 8432.96  402.56
   3   1   4  174.28    8.20
   3   1   4  187.98    8.40
   3   1   4  178.18    8.30
   4   2   4  901.81   39.50
   4   2   4  884.81   39.90
   4   2   4  880.21   39.50
   5   3   4  258.17   14.40
   5   3   4  325.57   13.90
  -5  -3  -4  334.87   14.00
   6   4   4  113.29    5.50
  -6  -4  -4  115.19    5.80
  -2  -5   4   26.10    1.70
   2   5  -4   29.80    1.60
   2   5  -4   27.10    1.70
  -1  -4   4    0.00    0.60
  -1  -4   4   -0.50    0.80
   1   4  -4   -0.50    0.80
   1   4  -4   -0.20    0.70
   0  -3   4   17.70    2.80
   0   3  -4   19.30    1.60
   1  -2   4   53.59    3.50
   1  -2   4   51.29    2.70
   2  -1   4    9.00    0.60
   2  -1   4    9.30    0.90
   2  -1   4    7.90    1.20
   2  -1   4    8.20    1.10
   3   0   4    0.40    0.30
   3   0   4   -0.20    0.40
   4   1   4  804.02   35.30
   4   1   4  802.82   35.40
   4   1   4  779.32   35.50
   5   2   4   16.60    1.90
   5   2   4   14.30    1.40
   6   3   4  226.18   10.20
  -6  -3  -4  219.88   10.30
   7   4   4   65.59    3.20
  -7  -4  -4   65.69    3.30
  -1  -5   4   25.30    1.70
   1   5  -4   25.60    1.80
   1   5  -4   25.00    1.60
   0  -4   4  444.16   19.90
   0   4  -4  442.46   19.90
   1  -3   4  715.13   32.40
   1  -3   4  695.43   31.40
  -1   3  -4  688.93   31.40
   2  -2   4  423.56   19.60
   2  -2   4  443.06   19.80
   2  -2   4  445.86   19.60
   3  -1   4  173.38    8.10
   3  -1   4  178.58    8.20
   4   0   4  655.13   28.40
   4   0   4  634.74   28.30
   4   0   4  619.24   28.30
   5   1   4  820.52   35.70
   5   1   4  785.22   35.80
   5   1   4  806.62   35.60
   5   1   4  781.12   35.50
   6   2   4   52.69    3.00
   6   2   4   50.99    3.40
   7   3   4   80.29    4.10
  -7  -3  -4   86.09    4.20
   8   4   4  284.27   12.60
   8   4   4  279.07   12.60
  -8  -4  -4  289.17   12.70
   0  -5   4   13.30    1.30
   0   5  -4   13.30    1.40
   1  -4   4    1.40    0.80
  -1   4  -4    3.70    0.90
   2  -3   4    1.20    0.70
   2  -3   4    3.40    1.40
   2  -3   4    0.10    0.80
   3  -2   4   15.30    1.30
   3  -2   4   19.00    1.50
   3  -2   4   19.10    2.30
   3  -2   4   19.10    1.70
   4  -1   4  692.23   34.20
   4  -1   4  797.32   33.50
   4  -1   4  760.82   33.70
   5   0   4    0.60    0.60
   5   0   4   -0.20    0.60
   5   0   4   -0.40    0.40
   6   1   4   75.49    4.30
   6   1   4   80.99    4.10
   6   1   4   77.29    4.20
   6   1   4   78.69    3.90
   7   2   4   41.40    3.00
   7   2   4   36.90    2.00
   7   2   4   26.30    2.90
   7   2   4   35.80    2.50
   8   3   4   13.30    1.10
   8   3   4   10.90    1.80
  -8  -3  -4   13.50    1.40
   1  -5   4   78.69    3.70
  -1   5  -4   72.09    3.70
   2  -4   4   42.70    2.60
  -2   4  -4   40.90    2.50
   3  -3   4  483.15   22.50
   3  -3   4  464.95   21.50
   4  -2   4  874.91   39.90
   4  -2   4  885.81   40.10
   4  -2   4  918.91   40.40
   5  -1   4  812.52   35.10
   5  -1   4  799.02   35.20
   5  -1   4  744.73   35.10
   6   0   4 2928.71  128.89
   6   0   4 2875.21  128.89
   6   0   4 2936.61  128.99
   7   1   4  247.28   11.80
   7   1   4  251.97   11.70
   8   2   4   63.39    4.10
   8   2   4   59.69    3.00
   8   2   4   59.29    3.20
  -8  -2  -4   62.39    3.20
   9   3   4  141.39    6.20
   9   3   4  129.69    6.10
   9   3   4  128.49    6.60
  -9  -3  -4  131.39    6.20
   2  -5   4    8.40    0.80
  -2   5  -4    8.90    0.90
   3  -4   4   95.99    4.50
  -3   4  -4   83.69    4.50
   4  -3   4  103.69    6.60
   4  -3   4  105.29    5.80
   5  -2   4   14.50    1.50
   5  -2   4   12.20    1.70
   5  -2   4   14.30    1.60
   6  -1   4   76.59    4.10
   6  -1   4   76.19    4.00
   6  -1   4   68.19    4.10
   7   0   4    0.90    0.70
   7   0   4   -1.10    0.60
   7   0   4   -0.10    0.80
   8   1   4  268.37   12.80
   8   1   4  298.67   13.40
   8   1   4  267.47   13.10
   8   1   4  286.37   13.30
   9   2   4   40.10    3.20
   9   2   4   38.70    2.40
   9   2   4   40.40    2.20
  -9  -2  -4   37.30    2.20
  10   3   4    2.30    0.50
  10   3   4    1.90    0.40
 -10  -3  -4    2.40    0.50
   3  -5   4  102.49    4.80
   3  -5   4  109.59    5.10
  -3   5  -4   98.79    4.90
   4  -4   4   12.70    1.10
   4  -4   4   11.90    1.00
  -4   4  -4   13.00    1.20
   5  -3   4  355.86   16.20
   5  -3   4  355.06   16.70
   5  -3   4  380.86   16.20
  -5   3  -4  357.56   16.30
   6  -2   4   45.00    3.00
   6  -2   4   47.10    3.30
   6  -2   4   48.10    3.50
   7  -1   4  249.18   11.80
   7  -1   4  245.78   11.70
   8   0   4  742.03   31.40
   8   0   4  705.33   31.30
   8   0   4  623.74   32.70
   9   1   4   17.50    1.60
   9   1   4   16.90    1.90
  10   2   4  501.15   22.40
 -10  -2  -4  483.65   22.00
   4  -5   4   -0.20    0.30
   4  -5   4    0.00    0.80
  -4   5  -4    0.30    0.60
   5  -4   4  101.09    5.40
   5  -4   4  102.49    4.80
  -5   4  -4  103.89    5.00
   6  -3   4  237.38   11.40
   6  -3   4  238.98   11.00
   6  -3   4  247.88   10.90
   7  -2   4   38.00    2.90
   7  -2   4   37.80    2.30
   8  -1   4  278.27   12.30
   8  -1   4  273.77   12.60
   8  -1   4  278.87   13.00
   8  -1   4  228.08   12.30
   9   0   4    0.10    0.70
   9   0   4    0.40    1.10
   9   0   4   -0.20    0.70
  10   1   4   27.70    2.60
  10   1   4   22.70    1.90
  11   2   4  111.99    5.80
  11   2   4   97.29    4.90
   6  -4   4  104.39    6.00
   6  -4   4  105.89    4.90
  -6   4  -4  107.09    5.10
   7  -3   4   84.09    4.70
   7  -3   4   81.09    4.10
   8  -2   4   59.49    3.20
   8  -2   4   63.89    3.70
   9  -1   4   17.60    1.40
   9  -1   4   14.70    1.60
   9  -1   4   14.70    1.30
  10   0   4   64.59    3.40
  10   0   4   66.69    3.90
  10   0   4   64.59    3.40
  11   1   4  260.47   12.00
  11   1   4  269.37   12.30
   7  -4   4   57.99    3.20
  -7   4  -4   55.99    3.00
   8  -3   4   11.50    1.10
   8  -3   4   12.10    1.50
   9  -2   4   42.70    3.00
   9  -2   4   41.20    2.50
  10  -1   4   24.00    2.40
  10  -1   4   21.50    1.70
  10  -1   4   25.10    1.80
  11   0   4   -0.80    1.00
  11   0   4    0.50    0.70
  11   0   4    0.30    0.60
  12   1   4    6.20    0.70
  12   1   4    6.10    1.00
   8  -4   4  279.77   12.30
   8  -4   4  267.37   12.20
   9  -3   4  131.99    6.20
   9  -3   4  125.49    5.90
  10  -2   4  512.95   22.60
  10  -2   4  489.45   22.30
  11  -1   4  258.57   11.80
  11  -1   4  258.97   11.80
  11  -1   4  271.77   12.20
  12   0   4   74.09    3.60
  12   0   4   73.19    3.90
  10  -3   4    1.80    0.70
  10  -3   4    1.60    0.60
  11  -2   4  101.29    5.00
  11  -2   4   99.29    5.00
  12  -1   4    5.40    0.90
  10  -3  -5   48.70    2.40
  10  -3  -5   45.50    2.40
  11  -1  -5  175.38    7.70
  11  -1  -5  166.38    7.70
  10  -2  -5   28.50    2.20
  10  -2  -5   33.20    1.90
   9  -3  -5    0.40    0.60
   9  -3  -5    0.30    0.70
   8  -4  -5   14.90    1.00
   8  -4  -5   14.30    1.20
  12   1  -5   16.10    1.10
  11   0  -5  545.85   24.50
  11   0  -5  549.65   24.30
  11   0  -5  539.65   24.20
  10  -1  -5  210.08    9.80
  10  -1  -5  223.28    9.80
   9  -2  -5   90.29    4.40
   9  -2  -5   91.39    4.40
   9  -2  -5   90.79    4.30
   8  -3  -5  283.07   12.80
   8  -3  -5  282.97   12.70
   7  -4  -5  367.26   16.00
   7  -4  -5  351.96   16.10
  11   1  -5  198.38    8.30
  11   1  -5  167.18    8.90
  11   1  -5  178.58    8.60
   9  -1  -5  157.28    7.60
   9  -1  -5  171.68    7.70
   9  -1  -5  170.88    7.60
   8  -2  -5    7.50    0.90
   8  -2  -5    7.40    1.00
   8  -2  -5    8.90    0.90
   7  -3  -5   25.40    2.00
   7  -3  -5   25.40    1.60
  -6   4   5  144.39    6.80
   6  -4  -5  148.19    6.90
   6  -4  -5  142.19    6.90
   6  -4  -5  155.38    6.80
  10   1  -5  240.98   11.10
  10   1  -5  250.07   11.10
  10   1  -5  243.78   11.30
   9   0  -5   65.69    3.30
   8  -1  -5 1205.58   52.09
   8  -1  -5 1134.69   51.89
   8  -1  -5 1150.18   52.19
   7  -2  -5  262.57   12.10
   7  -2  -5  247.98   12.80
   6  -3  -5  103.29    4.90
   6  -3  -5   97.59    4.70
   6  -3  -5  103.39    5.10
   6  -3  -5   97.19    4.80
  -5   4   5  800.72   34.70
   5  -4  -5  817.92   34.60
   5  -4  -5  786.12   34.70
   5  -4  -5  747.63   34.90
   5  -4  -5  748.73   34.70
  -4   5   5   20.10    1.30
   4  -5  -5   19.30    1.10
   4  -5  -5   17.00    1.30
  10   2  -5   43.00    2.60
  10   2  -5   48.80    2.80
  10   2  -5   36.10    2.50
  10   2  -5   48.10    2.40
   9   1  -5  206.78    8.80
   9   1  -5  182.38    8.70
   9   1  -5  186.78    9.00
   8   0  -5    0.40    0.70
   8   0  -5    0.70    1.00
   8   0  -5   -0.60    0.90
   7  -1  -5  421.76   18.50
   7  -1  -5  403.76   18.30
   7  -1  -5  411.76   18.60
   7  -1  -5  384.66   19.00
   7  -1  -5  396.36   18.30
   7  -1  -5  399.06   18.20
   6  -2  -5   78.19    4.20
   6  -2  -5   73.89    5.20
   6  -2  -5   75.79    4.20
   5  -3  -5    0.00    0.70
   5  -3  -5    1.00    0.50
   5  -3  -5    0.40    0.80
   5  -3  -5    2.40    1.50
   5  -3  -5   -0.10    0.60
  -4   4   5   51.79    2.80
   4  -4  -5   48.10    2.70
   4  -4  -5   53.39    3.00
   4  -4  -5   54.69    2.80
  -3   5   5   37.00    1.90
   3  -5  -5   32.10    1.90
   3  -5  -5   33.30    1.70
 -10  -3   5   47.10    2.40
  10   3  -5   46.20    2.40
  10   3  -5   51.29    2.40
   9   2  -5  103.79    4.90
   9   2  -5  103.49    5.40
   9   2  -5  108.89    5.00
   9   2  -5  104.49    5.20
   8   1  -5 1224.88   55.09
   8   1  -5 1221.78   54.59
   7   0  -5   41.90    2.40
   7   0  -5   39.30    3.50
   7   0  -5   38.50    2.30
   7   0  -5   37.30    2.20
   6  -1  -5  336.77   15.30
   6  -1  -5  328.67   15.10
   6  -1  -5  337.37   15.40
   6  -1  -5  326.47   15.10
   6  -1  -5  325.47   15.20
   6  -1  -5  344.47   15.80
   5  -2  -5  187.68    9.40
   5  -2  -5  187.88    8.90
   5  -2  -5  182.58    8.80
   4  -3  -5   29.40    3.50
  -3   4   5   15.20    1.60
   3  -4  -5   23.00    1.60
   3  -4  -5   19.40    1.60
   3  -4  -5   17.40    1.70
  -2   5   5  256.37   11.10
   2  -5  -5  232.58   11.10
  -9  -3   5    0.30    0.50
   9   3  -5    0.30    0.60
   9   3  -5    0.70    0.70
   9   3  -5    0.10    0.60
   8   2  -5   10.80    1.10
   8   2  -5    9.60    1.00
   8   2  -5   10.50    1.10
   8   2  -5    9.10    0.90
   8   2  -5    8.20    1.30
   7   1  -5  423.76   19.30
   7   1  -5  422.16   19.70
   6   0  -5   -0.40    0.70
   6   0  -5    0.00    0.50
   6   0  -5   -1.10    0.40
   6   0  -5    0.10    0.70
   6   0  -5    0.00    1.10
   6   0  -5   -0.20    0.50
   5  -1  -5  116.49    5.50
   5  -1  -5  117.19    5.70
   5  -1  -5  108.89    6.00
   5  -1  -5  129.49    6.20
   5  -1  -5  117.09    5.70
   5  -1  -5  116.29    5.60
   4  -2  -5  149.59    7.10
   4  -2  -5  156.78    7.70
   4  -2  -5  140.59    7.10
   3  -3  -5   60.69    3.70
   3  -3  -5   64.39    4.50
  -2   4   5    4.10    0.90
   2  -4  -5    3.00    0.80
   2  -4  -5    3.30    1.00
   2  -4  -5    3.20    0.80
  -1   5   5   -0.20    0.60
   1  -5  -5    0.70    0.60
  -8  -3   5  332.97   14.40
   8   3  -5  308.37   14.40
   8   3  -5  309.57   14.30
   8   3  -5  328.67   14.30
   7   2  -5  278.67   13.70
   7   2  -5  289.27   13.30
   6   1  -5  337.27   15.50
   6   1  -5  341.77   15.80
   5   0  -5 1346.47   59.19
   5   0  -5 1325.07   59.19
   5   0  -5 1343.27   59.69
   5   0  -5 1313.47   59.19
   5   0  -5 1356.86   59.19
   5   0  -5 1334.77   59.49
   4  -1  -5  817.22   37.00
   4  -1  -5  834.42   37.10
   4  -1  -5  880.41   37.10
   4  -1  -5  807.72   37.20
   3  -2  -5 1241.08   56.89
   3  -2  -5 1323.57   57.29
   2  -3  -5   71.99    4.60
   2  -3  -5   69.59    4.00
  -1   4   5  108.69    5.40
   1  -4  -5  109.19    5.30
   1  -4  -5  117.69    5.50
   0   5   5   59.19    2.90
   0  -5  -5   51.49    2.90
  -8  -4   5   17.60    1.10
   8   4  -5   16.80    1.00
   8   4  -5   15.70    1.10
   8   4  -5   16.80    1.10
  -7  -3   5   27.60    2.30
   7   3  -5   27.90    2.10
   7   3  -5   26.20    1.80
   6   2  -5   79.09    4.60
   6   2  -5   79.69    4.30
   5   1  -5  122.99    5.70
   5   1  -5  121.79    6.20
   5   1  -5  125.49    5.90
   4   0  -5   -0.30    0.80
   4   0  -5    0.40    0.30
   4   0  -5    0.80    0.50
   4   0  -5   -0.20    0.30
   4   0  -5    0.10    0.50
   4   0  -5    0.50    0.40
   3  -1  -5  636.14   29.10
   3  -1  -5  694.63   29.30
   3  -1  -5  672.43   29.10
   3  -1  -5  610.94   29.10
   2  -2  -5  120.09    5.80
   1  -3  -5    0.70    0.90
   1  -3  -5   -0.30    1.00
   0   4   5  202.58    9.70
   0  -4  -5  219.38    9.80
   1   5   5    9.10    0.90
   1   5   5   10.70    1.10
  -1  -5  -5    7.20    0.90
  -7  -4   5  387.16   16.90
   7   4  -5  375.86   16.80
   7   4  -5  369.26   16.80
  -6  -3   5  112.89    5.40
   6   3  -5  110.49    5.30
   5   2  -5  186.88    8.80
   5   2  -5  185.08    9.10
   4   1  -5  841.42   37.10
   4   1  -5  822.72   37.20
   3   0  -5  735.53   33.60
   3   0  -5  782.72   33.90
   3   0  -5  753.42   33.60
   2  -1  -5 2601.44  111.59
   2  -1  -5 2380.46  111.39
   2  -1  -5 2588.14  111.39
   1  -2  -5 1902.81   80.89
   1  -2  -5 1746.53   80.99
   0  -3  -5  340.07   16.30
   0  -3  -5  350.66   15.90
   1   4   5  791.62   35.00
   1   4   5  789.32   35.10
  -1  -4  -5  761.52   34.90
  -1  -4  -5  798.82   35.10
   2   5   5   83.59    4.10
   2   5   5   90.09    4.20
  -2  -5  -5   85.99    4.20
  -6  -4   5  151.68    7.10
   6   4  -5  154.58    7.10
   6   4  -5  157.78    7.30
  -5  -3   5    1.30    0.70
   5   3  -5    0.00    0.60
   4   2  -5  137.99    7.00
   4   2  -5  148.99    6.90
   3   1  -5  735.03   29.60
   3   1  -5  631.54   29.60
   3   1  -5  628.94   29.80
   2   0  -5    0.20    0.40
   2   0  -5    0.20    0.30
   2   0  -5   -0.20    0.60
   1  -1  -5  105.19    5.10
   1  -1  -5  113.79    5.30
   1  -1  -5  113.59    5.10
   0  -2  -5 1005.40   43.10
   0  -2  -5  934.51   43.30
  -1  -3  -5    5.30    1.20
  -1  -3  -5    5.60    1.10
   2   4   5    1.10    0.70
   2   4   5    1.70    0.80
  -2  -4  -5    1.90    0.80
  -2  -4  -5    1.10    0.80
   3   5   5    9.70    1.00
  -3  -5  -5    6.70    0.70
  -5  -4   5  770.12   34.30
   5   4  -5  772.22   34.30
   3   2  -5 1042.60   49.50
   3   2  -5 1191.68   49.70
   2   1  -5 2429.66   96.99
   2   1  -5 1958.40   97.69
   1   0  -5   21.30    1.40
   1   0  -5   28.30    1.70
   1   0  -5   23.60    1.30
   0  -1  -5 3024.20  128.59
   0  -1  -5 2803.52  128.59
   1   2   5 3204.68  140.79
  -1  -2  -5 3048.09  141.19
  -1  -2  -5 3327.17  141.19
  -2  -3  -5  140.79    7.10
   3   4   5  205.68    9.50
   3   4   5  200.48    9.40
  -3  -4  -5  203.38    9.50
  -3  -4  -5  208.48    9.50
   4   5   5    8.60    0.90
  -4  -5  -5    7.00    0.60
  -4  -5  -5    8.60    0.80
  -4  -4   5   51.89    2.70
   4   4  -5   50.39    2.80
   3   3  -5   63.29    3.60
   2   2  -5  106.69    5.20
   2   2  -5  106.19    5.30
  -1  -1   5   99.39    4.60
   1   1  -5  104.09    4.80
   0   0   5    0.40    0.30
   0   0  -5   -0.10    0.20
   1   1   5 1706.73   72.09
  -1  -1  -5 1560.54   72.19
   2   2   5    7.60    0.70
  -2  -2  -5    7.20    1.10
   3   3   5    4.00    1.40
  -3  -3  -5    8.40    1.30
   4   4   5    1.70    0.80
  -4  -4  -5    3.40    0.70
  -4  -4  -5    0.90    0.80
  -4  -5   5   18.30    1.20
  -4  -5   5   18.40    1.30
   4   5  -5   16.70    1.00
   4   5  -5   19.80    1.20
  -3  -4   5   22.10    1.80
  -3  -4   5   19.60    1.60
   3   4  -5   20.10    1.70
   3   4  -5   19.90    1.70
  -2  -3   5   66.99    4.90
   2   3  -5   68.79    3.70
   1   2  -5 1670.33   73.99
   0  -1   5 2762.52  120.79
   0  -1   5 2788.62  120.79
   0   1  -5 2660.13  120.89
   1   0   5   50.99   19.60
  -1   0  -5   41.90   14.10
   2   1   5  186.98    8.00
   2   1   5  159.98    7.80
   3   2   5  467.45   20.40
   3   2   5  426.06   19.90
   4   3   5   11.90    1.90
   5   4   5   36.20    2.20
  -5  -4  -5   37.10    2.30
  -3  -5   5   29.20    1.80
  -3  -5   5   34.60    1.80
   3   5  -5   34.30    1.80
  -2  -4   5    5.30    0.90
  -2  -4   5    5.20    0.80
   2   4  -5    4.50    1.00
   2   4  -5    3.40    0.80
  -1  -3   5   -0.40    1.20
   1   3  -5   -0.10    0.60
   0  -2   5  874.41   36.90
   0   2  -5  788.62   36.90
   1  -1   5 1779.72   76.99
   1  -1   5 1702.93   76.89
   2   0   5   -0.50    0.40
   2   0   5    0.00    0.30
   2   0   5    0.10    0.40
   3   1   5 1267.07   58.79
   3   1   5 1411.16   58.99
   3   1   5 1312.47   58.89
   4   2   5   22.90    2.30
   4   2   5   19.60    1.40
   5   3   5  573.54   24.60
   5   3   5  474.55   25.10
  -5  -3  -5  600.44   24.70
   6   4   5    1.20    0.60
  -6  -4  -5    2.40    0.70
  -2  -5   5  239.68   11.10
   2   5  -5  261.27   11.10
   2   5  -5  239.68   11.10
  -1  -4   5  131.89    6.00
  -1  -4   5  110.59    5.80
   1   4  -5  130.49    6.00
   1   4  -5  126.29    6.00
   0  -3   5  338.97   15.90
   0   3  -5  303.17   15.40
   1  -2   5 2957.20  142.39
   1  -2   5 3498.05  143.79
   2  -1   5  164.38    7.30
   2  -1   5  143.09    7.40
   2  -1   5  160.58    7.10
   3   0   5 2381.56  107.19
   3   0   5 2435.16  107.19
   3   0   5 2461.85  107.19
   4   1   5 1023.40   46.00
   4   1   5 1041.10   45.80
   4   1   5 1030.10   45.80
   5   2   5   76.99    4.50
   5   2   5   76.79    3.90
   6   3   5  110.19    5.30
  -6  -3  -5  109.19    5.40
   7   4   5  142.59    6.50
  -7  -4  -5  142.29    6.60
  -1  -5   5    0.20    0.60
   1   5  -5    0.50    0.70
   1   5  -5    0.40    0.60
   0  -4   5  237.78   11.00
   0   4  -5  241.78   11.00
   1  -3   5    4.80    1.60
   1  -3   5    7.40    1.10
   2  -2   5    6.00    0.70
   2  -2   5    6.60    1.20
   2  -2   5    7.10    1.00
   3  -1   5 1312.07   53.99
   3  -1   5 1074.39   54.09
   3  -1   5 1263.17   53.89
   4   0   5   -0.20    0.40
   4   0   5   -0.30    0.50
   4   0   5   -0.10    0.50
   5   1   5  695.93   32.00
   5   1   5  725.93   32.00
   5   1   5  731.03   32.20
   6   2   5   28.90    2.70
   6   2   5   31.90    2.10
   7   3   5    0.10    1.30
   7   3   5   -0.20    0.60
  -7  -3  -5   -0.80    0.70
   8   4   5   15.00    0.90
   8   4   5   13.20    1.00
  -8  -4  -5   14.50    1.00
   0  -5   5   53.29    2.70
   0   5  -5   49.30    2.70
   1  -4   5  946.61   41.50
  -1   4  -5  918.91   41.50
   2  -3   5  135.59    7.60
   2  -3   5  124.49    6.30
   3  -2   5  480.15   20.80
   3  -2   5  411.86   20.10
   3  -2   5  444.76   20.30
   4  -1   5 1066.29   46.90
   4  -1   5 1043.40   46.50
   4  -1   5 1023.80   46.60
   5   0   5   96.99    5.20
   5   0   5  101.49    4.90
   5   0   5  102.49    5.00
   6   1   5  158.68    7.40
   6   1   5  159.18    7.70
   6   1   5  150.08    7.40
   7   2   5   82.99    4.00
   7   2   5   69.09    4.70
   7   2   5   85.29    4.00
  -7  -2  -5   86.79    4.10
   8   3   5   96.79    5.60
   8   3   5  102.69    4.90
  -8  -3  -5  108.69    5.10
   1  -5   5    8.50    0.80
  -1   5  -5    7.40    0.90
   2  -4   5    2.00    0.80
  -2   4  -5    1.20    0.90
   3  -3   5    4.50    1.00
   3  -3   5    3.90    1.60
   4  -2   5   19.50    1.90
   4  -2   5   18.40    1.60
   4  -2   5   18.50    2.40
   5  -1   5  729.43   32.20
   5  -1   5  696.53   32.10
   5  -1   5  724.93   32.10
   6   0   5   -0.10    0.70
   6   0   5    1.10    0.70
   6   0   5    1.70    0.70
   7   1   5  402.66   18.40
   7   1   5  393.86   18.20
   8   2   5   22.70    1.70
   8   2   5   20.50    2.50
   8   2   5   19.50    1.40
  -8  -2  -5   22.40    1.60
   9   3   5   16.60    1.20
   9   3   5   17.70    1.60
   9   3   5   17.10    1.00
   9   3   5   15.00    2.00
  -9  -3  -5   18.10    1.40
   2  -5   5   85.29    4.40
   2  -5   5   98.69    5.10
  -2   5  -5   92.09    4.70
   3  -4   5  227.28   10.40
  -3   4  -5  228.78   10.50
   4  -3   5   13.50    1.50
   4  -3   5   10.20    1.90
   5  -2   5   74.79    4.20
   5  -2   5   78.79    4.50
   5  -2   5   81.09    4.90
   6  -1   5  139.39    7.50
   7   0   5  836.82   37.70
   7   0   5  824.92   37.70
   7   0   5  859.61   37.90
   8   1   5   11.50    1.10
   8   1   5   11.00    1.60
   9   2   5  447.56   19.50
   9   2   5  432.16   20.10
   9   2   5  449.76   19.70
  -9  -2  -5  422.86   19.70
 -10  -3  -5    8.80    0.90
   3  -5   5    7.50    1.00
   3  -5   5    7.40    0.70
  -3   5  -5    8.20    0.90
   4  -4   5    1.30    0.70
   4  -4   5    2.70    1.30
   4  -4   5    1.90    0.70
  -4   4  -5    1.50    0.90
   5  -3   5  640.84   29.20
  -5   3  -5  653.93   28.90
   6  -2   5   26.10    2.80
   6  -2   5   33.10    2.70
   6  -2   5   28.80    2.30
   7  -1   5  382.26   17.80
   7  -1   5  393.06   18.00
   8   0   5   -0.30    1.10
   8   0   5    0.30    0.80
   9   1   5  306.57   13.70
   9   1   5  288.37   13.60
   9   1   5  308.67   14.10
  10   2   5   20.40    2.60
  10   2   5   26.70    1.80
 -10  -2  -5   25.90    1.60
   4  -5   5    9.00    1.00
  -4   5  -5    8.50    0.90
   5  -4   5   33.70    2.80
   5  -4   5   35.40    2.10
  -5   4  -5   36.30    2.70
   6  -3   5  113.79    6.00
   6  -3   5  112.59    5.40
   6  -3   5  117.79    5.30
  -6   3  -5  110.99    5.40
   7  -2   5   92.49    4.90
   7  -2   5   94.19    4.50
   8  -1   5   12.80    1.40
   8  -1   5   12.70    1.10
   8  -1   5   11.60    1.50
   9   0   5  154.58    7.20
   9   0   5  154.28    7.60
   9   0   5  149.59    7.10
  10   1   5   43.30    3.10
  10   1   5   43.70    2.60
  11   2   5   45.30    2.80
  11   2   5   47.90    2.40
   6  -4   5    1.40    0.70
   6  -4   5    1.70    1.10
  -6   4  -5    1.40    0.80
   7  -3   5   -0.60    2.00
   7  -3   5    0.00    0.80
   8  -2   5   22.40    1.90
   8  -2   5   22.20    2.40
   9  -1   5  332.47   14.30
   9  -1   5  317.97   14.70
   9  -1   5  305.37   14.40
  10   0   5    1.10    0.80
  10   0   5    0.00    1.10
  10   0   5    0.70    0.80
  11   1   5   87.39    4.70
  11   1   5   89.79    4.30
   7  -4   5  127.29    5.50
   7  -4   5  127.39    5.80
  -7   4  -5  107.49    5.70
   8  -3   5  107.69    5.50
   8  -3   5  107.69    5.10
   9  -2   5  460.95   20.40
   9  -2   5  440.36   20.10
  10  -1   5   44.60    3.00
  10  -1   5   45.20    2.50
  10  -1   5   42.30    2.40
  11   0   5   36.30    3.30
  11   0   5   38.70    2.30
  11   0   5   32.90    2.10
  12   1   5  326.57   15.00
  12   1   5  336.57   14.80
   8  -4   5   12.00    1.30
   8  -4   5   15.80    1.40
   9  -3   5   15.50    1.80
   9  -3   5   16.40    1.40
  10  -2   5   26.10    2.50
  10  -2   5   27.70    2.30
  11  -1   5   87.29    4.10
  11  -1   5   79.59    4.10
  11  -1   5   87.59    4.50
  12   0   5   -0.60    0.50
  12   0   5   -0.10    0.80
  10  -3   5    8.80    0.70
  10  -3   5    8.50    0.90
  11  -2   5   47.00    2.70
  11  -2   5   47.10    2.40
  12  -1   5  341.07   15.40
  11  -2  -6    1.60    0.40
  11  -2  -6    0.90    0.50
  10  -3  -6    1.80    0.50
  10  -3  -6    2.40    0.50
  12   0  -6  351.96   15.90
  12   0  -6  364.56   16.00
  11  -1  -6  150.38    6.80
  11  -1  -6  148.59    6.80
  10  -2  -6  114.99    5.30
  10  -2  -6  115.69    5.60
   9  -3  -6   30.90    1.90
   8  -4  -6   19.70    1.30
   8  -4  -6   20.10    1.20
  12   1  -6    3.30    0.70
  12   1  -6    3.20    0.50
  11   0  -6    1.10    0.70
  10  -1  -6   16.70    1.30
  10  -1  -6   17.70    1.40
   9  -2  -6   54.49    2.70
   9  -2  -6   52.59    2.80
   9  -2  -6   56.19    2.90
   8  -3  -6   48.50    2.60
   8  -3  -6   42.10    2.50
   8  -3  -6   45.20    2.40
   7  -4  -6   21.80    1.50
   7  -4  -6   21.70    1.50
  11   1  -6  181.08    8.30
  11   1  -6  185.18    8.10
  11   1  -6  171.08    8.20
  10   0  -6   30.40    1.80
  10   0  -6   27.80    2.20
  10   0  -6   29.20    1.90
   9  -1  -6  340.77   14.90
   9  -1  -6  325.77   15.00
   8  -2  -6  174.88    8.00
   8  -2  -6  179.08    8.10
   8  -2  -6  171.58    8.00
   7  -3  -6  410.36   18.00
   7  -3  -6  390.76   17.90
   7  -3  -6  401.36   17.90
  -6   4   6   14.10    1.20
   6  -4  -6   14.50    1.60
  11   2  -6    3.10    0.70
  11   2  -6    2.20    0.60
  11   2  -6    1.10    0.50
  10   1  -6   26.10    1.70
  10   1  -6   22.60    2.00
  10   1  -6   20.00    1.60
   9   0  -6   -0.40    0.70
   9   0  -6    0.00    0.60
   9   0  -6    0.10    0.60
   8  -1  -6  706.93   32.70
   8  -1  -6  730.53   33.20
   8  -1  -6  721.43   32.40
   7  -2  -6  302.07   13.00
   7  -2  -6  290.47   12.60
   7  -2  -6  241.68   12.80
   6  -3  -6    3.60    0.90
   6  -3  -6    3.70    0.80
   6  -3  -6    4.30    1.00
   5  -4  -6   19.70    2.30
   5  -4  -6   21.40    1.90
   5  -4  -6   23.40    1.60
   5  -4  -6   18.60    1.20
  -4   5   6   16.30    1.20
   4  -5  -6   16.00    1.00
  10   2  -6  128.59    6.40
  10   2  -6  143.39    6.40
   9   1  -6  348.27   15.50
   9   1  -6  352.56   15.50
   9   1  -6  338.77   15.70
   8   0  -6 1201.68   54.99
   8   0  -6 1225.18   54.99
   8   0  -6 1272.37   55.49
   7  -1  -6   85.29    4.50
   7  -1  -6   84.89    5.50
   7  -1  -6   79.69    5.50
   7  -1  -6   82.49    4.30
   6  -2  -6   70.39    4.10
   6  -2  -6   73.19    5.10
   5  -3  -6   63.29    3.10
   5  -3  -6   62.79    3.20
  -4   4   6  402.76   18.30
   4  -4  -6  429.66   18.20
   4  -4  -6  402.66   18.30
   4  -4  -6  387.56   18.10
  -3   5   6   22.40    1.40
   3  -5  -6   17.90    1.20
   3  -5  -6   20.60    1.20
 -10  -3   6    2.00    0.60
  10   3  -6    2.00    0.50
  10   3  -6    2.10    0.50
  10   3  -6    2.30    0.50
   9   2  -6   62.49    3.30
   9   2  -6   62.99    3.10
   9   2  -6   65.39    3.10
   9   2  -6   47.10    3.80
   8   1  -6  725.63   32.90
   8   1  -6  733.73   33.40
   7   0  -6   -0.60    0.90
   7   0  -6   -0.10    2.30
   7   0  -6    0.90    0.60
   7   0  -6    0.10    0.90
   6  -1  -6   18.20    3.00
   6  -1  -6   18.50    1.60
   6  -1  -6   18.30    1.60
   6  -1  -6   15.90    1.90
   6  -1  -6   18.30    1.30
   5  -2  -6    2.10    1.30
   5  -2  -6    2.60    0.90
   4  -3  -6    2.10    1.40
   4  -3  -6    1.40    1.00
  -3   4   6    1.50    0.80
   3  -4  -6    1.70    0.70
   3  -4  -6    1.40    0.90
   3  -4  -6    2.10    0.80
  -2   5   6   14.40    1.50
   2  -5  -6   10.90    1.10
  -9  -3   6   33.50    1.90
   9   3  -6   33.00    1.90
   9   3  -6   34.70    1.90
   9   3  -6   36.40    1.90
   8   2  -6  202.18    9.40
   8   2  -6  216.48    9.30
   8   2  -6  211.88    9.30
   8   2  -6  201.78    9.10
   8   2  -6  183.18    9.80
   7   1  -6   87.19    5.00
   7   1  -6   88.39    4.60
   6   0  -6 1026.70   45.70
   6   0  -6 1070.19   45.30
   6   0  -6  990.00   45.80
   6   0  -6 1009.70   45.40
   6   0  -6  998.20   45.30
   5  -1  -6  328.67   15.40
   5  -1  -6  346.87   15.60
   5  -1  -6  366.56   15.90
   5  -1  -6  326.77   15.40
   5  -1  -6  330.37   15.20
   4  -2  -6  179.88    8.50
   4  -2  -6  182.48    9.10
   3  -3  -6   24.80    3.10
   3  -3  -6   22.60    2.20
  -2   4   6   72.49    4.20
   2  -4  -6   84.89    4.10
   2  -4  -6   81.79    4.20
  -1   5   6  544.15   23.20
   1  -5  -6  498.15   23.20
  -8  -3   6   55.09    2.80
   8   3  -6   51.79    2.60
   8   3  -6   50.79    2.70
   8   3  -6   51.59    2.80
   8   3  -6   50.69    2.80
   7   2  -6  326.97   15.60
   7   2  -6  325.77   14.40
   7   2  -6  308.57   14.60
   6   1  -6   19.00    1.60
   6   1  -6   19.60    1.90
   5   0  -6    0.20    0.40
   5   0  -6    0.00    0.40
   5   0  -6    0.80    1.20
   5   0  -6    0.50    0.70
   4  -1  -6  127.39    6.10
   4  -1  -6  111.19    5.30
   4  -1  -6  116.19    5.50
   4  -1  -6  113.29    5.60
   3  -2  -6  299.57   13.70
   3  -2  -6  300.67   14.10
   2  -3  -6  283.27   14.00
   2  -3  -6  300.27   13.60
  -1   4   6    0.80    0.70
   1  -4  -6   -0.10    0.80
   1  -4  -6    1.80    0.80
   0   5   6   38.10    2.30
   0  -5  -6   38.50    2.20
  -8  -4   6   22.10    1.30
   8   4  -6   20.40    1.10
   8   4  -6   19.30    1.20
   8   4  -6   22.40    1.20
  -7  -3   6  467.15   20.30
   7   3  -6  428.96   20.30
   7   3  -6  462.85   20.20
   7   3  -6  451.55   20.20
   6   2  -6   78.99    4.20
   6   2  -6   70.99    4.40
   5   1  -6  322.37   15.20
   5   1  -6  339.17   15.50
   5   1  -6  338.57   15.10
   4   0  -6  174.88    8.10
   4   0  -6  169.48    7.90
   4   0  -6  159.78    7.60
   4   0  -6  164.18    7.70
   4   0  -6  164.68    7.50
   3  -1  -6 5271.37  226.08
   3  -1  -6 4971.20  225.78
   2  -2  -6  885.91   39.40
   2  -2  -6  885.11   39.70
   1  -3  -6  210.68    9.80
   1  -3  -6  200.68   10.20
   0   4   6  161.08    7.70
   0  -4  -6  166.08    7.70
   1   5   6  144.79    7.20
   1   5   6  155.28    7.10
  -1  -5  -6  166.58    7.30
  -7  -4   6   24.80    1.50
   7   4  -6   21.10    1.40
   7   4  -6   23.80    1.50
  -6  -3   6    4.80    0.80
   6   3  -6    4.10    0.80
   6   3  -6    3.30    0.70
   5   2  -6    2.80    0.80
   5   2  -6    2.00    0.90
   4   1  -6  113.49    5.60
   4   1  -6  126.09    5.80
   4   1  -6  116.59    5.90
   3   0  -6   -0.20    0.40
   3   0  -6   -0.30    0.40
   3   0  -6   -0.40    0.70
   3   0  -6    0.30    0.30
   2  -1  -6  890.51   40.70
   2  -1  -6  945.91   40.80
   2  -1  -6  913.01   40.60
   1  -2  -6  250.27   11.00
   1  -2  -6  229.48   11.30
   0  -3  -6   16.70    3.10
   1   4   6   16.50    1.60
   1   4   6   20.20    1.70
  -1  -4  -6   18.80    1.80
  -1  -4  -6   13.90    1.40
   2   5   6    2.50    0.60
   2   5   6    2.40    0.60
  -2  -5  -6    2.80    0.60
  -6  -4   6   16.50    1.60
   6   4  -6   15.70    1.70
   6   4  -6   15.40    1.30
  -5  -3   6   72.79    3.70
   5   3  -6   67.59    3.70
   4   2  -6  181.88    8.50
   4   2  -6  178.58    8.70
   3   1  -6 5433.56  252.37
   3   1  -6 6315.17  252.17
   3   1  -6 5397.36  252.17
   2   0  -6 2103.59   82.69
   2   0  -6 1870.81   82.39
   2   0  -6 1722.43   82.39
   2   0  -6 1768.22   82.59
   1  -1  -6 1140.39   51.19
   1  -1  -6 1170.08   51.09
   0  -2  -6   19.40    1.80
   0  -2  -6   20.00    1.60
  -1  -3  -6  850.31   38.20
   2   4   6  161.38    8.00
   2   4   6  178.48    8.10
  -2  -4  -6  176.58    8.10
  -2  -4  -6  171.38    8.00
   3   5   6   62.49    3.00
  -3  -5  -6   59.29    3.00
  -5  -4   6   22.40    1.60
   5   4  -6   19.70    1.60
   4   3  -6    1.20    0.80
   3   2  -6  281.67   12.30
   3   2  -6  249.68   12.90
   2   1  -6  861.01   38.70
   2   1  -6  881.41   38.90
   1   0  -6    0.10    0.60
   1   0  -6   -0.20    0.30
   1   0  -6    0.60    0.40
   0  -1  -6  700.13   31.90
   0  -1  -6  737.73   32.00
  -1  -2  -6   56.09    3.00
  -1  -2  -6   50.09    3.00
  -2  -3  -6    9.10    1.40
   3   4   6   82.39    4.10
   3   4   6   83.39    4.00
  -3  -4  -6   84.39    4.20
  -3  -4  -6   75.29    4.10
  -4  -4   6  404.06   18.20
   4   4  -6  407.36   18.20
   3   3  -6   19.60    1.80
   2   2  -6  794.82   35.80
   2   2  -6  806.72   35.70
  -1  -1   6 1117.29   48.90
   1   1  -6 1094.99   49.10
   0   0  -6   30.30    1.60
   1   1   6  150.68    6.40
  -1  -1  -6  134.69    6.50
  -1  -1  -6  138.39    6.50
   2   2   6  659.83   29.00
  -2  -2  -6  648.94   29.30
   4   4   6   10.10    1.00
  -4  -4  -6    8.40    1.00
  -4  -4  -6    8.20    1.10
  -4  -5   6   16.20    1.20
  -4  -5   6   16.80    1.00
   4   5  -6   15.10    1.10
  -3  -4   6    1.90    0.80
  -3  -4   6    1.80    0.70
   3   4  -6    2.00    0.70
   3   4  -6    1.70    0.80
  -2  -3   6  269.37   13.70
   2   3  -6  269.17   12.60
   1   2  -6  220.68    9.80
   1   2  -6  205.08    9.80
   0  -1   6  846.12   36.50
   0  -1   6  830.22   36.50
   0   1  -6  798.72   36.70
   1   0   6    0.00    0.40
   2   1   6 4247.08  175.58
   2   1   6 3706.73  175.38
   3   2   6   29.00    1.60
   3   2   6   29.20    2.50
   4   3   6  282.87   12.70
   4   3   6  260.87   13.10
  -4  -3  -6  288.47   12.70
   5   4   6   60.89    3.10
  -5  -4  -6   54.49    3.30
  -3  -5   6   21.20    1.30
  -3  -5   6   19.90    1.10
   3   5  -6   21.00    1.30
  -2  -4   6   78.09    4.50
  -2  -4   6   88.19    4.70
   2   4  -6   86.89    4.40
  -1  -3   6  197.88   10.70
   1   3  -6  207.18    9.60
   0  -2   6   20.40    1.30
   0   2  -6   14.50    1.30
   1  -1   6  160.88    7.40
   1  -1   6  161.08    7.30
   2   0   6 3548.94  154.68
   2   0   6 3460.95  154.68
   3   1   6 1430.16   66.49
   3   1   6 1618.74   66.59
   3   1   6 1460.15   66.69
   4   2   6  549.74   24.20
   4   2   6  537.95   24.20
   4   2   6  532.85   24.60
   5   3   6  613.14   28.90
   5   3   6  635.04   28.40
  -5  -3  -6  655.03   28.40
   6   4   6    8.70    0.90
  -6  -4  -6    6.70    0.90
  -2  -5   6   11.40    1.10
   2   5  -6    9.90    1.20
   2   5  -6   13.50    1.10
  -1  -4   6    0.50    0.60
  -1  -4   6    1.20    0.80
   1   4  -6    0.70    0.70
   1   4  -6    0.50    0.90
   0  -3   6   25.40    3.30
   0   3  -6   26.00    2.00
   1  -2   6   51.69    2.50
   1  -2   6   53.89    3.60
  -1   2  -6   41.30    2.50
   2  -1   6 3905.21  167.18
   2  -1   6 3745.43  166.58
   2  -1   6 3671.63  166.58
   3   0   6    0.30    0.50
   3   0   6    0.10    0.50
   3   0   6    0.70    0.40
   4   1   6  261.67   11.90
   4   1   6  251.27   11.70
   4   1   6  260.47   11.80
   5   2   6  369.76   17.30
   5   2   6  374.76   16.90
   6   3   6   22.40    2.80
   6   3   6   23.40    1.70
  -6  -3  -6   22.60    1.80
  -7  -4  -6    2.10    0.70
  -1  -5   6  558.34   24.20
   1   5  -6  512.25   24.20
   1   5  -6  561.54   24.20
   0  -4   6  184.18    8.10
   0   4  -6  147.89    8.00
   0   4  -6  183.18    8.10
   1  -3   6  675.13   32.90
   1  -3   6  792.82   34.20
  -1   3  -6  737.23   33.00
   2  -2   6  652.23   28.60
   2  -2   6  618.74   28.10
   2  -2   6  643.74   27.90
  -2   2  -6  582.04   27.90
   3  -1   6 1406.06   61.79
   3  -1   6 1310.97   61.89
   3  -1   6 1459.25   61.69
   4   0   6 1675.13   71.89
   4   0   6 1571.54   72.39
   5   1   6 1055.09   46.50
   5   1   6 1057.09   46.70
   5   1   6 1023.20   46.50
   6   2   6  364.46   16.70
   7   3   6  407.96   18.50
   7   3   6  397.86   19.10
  -7  -3  -6  427.96   18.60
   0  -5   6   45.40    2.30
   0   5  -6   39.90    2.60
   1  -4   6   21.10    1.90
  -1   4  -6   21.80    2.00
   2  -3   6    5.70    1.30
   2  -3   6    7.20    1.80
   3  -2   6   29.20    2.70
   3  -2   6   26.80    1.90
   3  -2   6   24.40    2.10
   4  -1   6  254.47   11.70
   4  -1   6  247.28   11.50
   4  -1   6  251.17   11.70
   5   0   6   -0.30    0.50
   5   0   6   -0.80    0.60
   5   0   6   -0.20    0.60
   6   1   6   19.10    1.60
   6   1   6   24.70    1.90
   6   1   6   18.80    2.00
   7   2   6   15.10    1.50
   7   2   6   17.10    2.10
  -7  -2  -6   15.90    1.70
   8   3   6    0.30    0.50
   8   3   6    0.30    2.00
  -8  -3  -6    0.60    0.70
   1  -5   6  156.08    7.20
   2  -4   6  212.88    9.30
  -2   4  -6  186.18    9.40
   3  -3   6  260.17   12.10
   3  -3   6  257.37   14.10
   4  -2   6  564.74   25.00
   4  -2   6  510.15   24.40
   4  -2   6  547.45   24.70
   5  -1   6  985.70   45.50
   5  -1   6 1066.49   45.60
   5  -1   6 1007.60   45.50
   6   0   6  231.98   10.70
   6   0   6  232.18   10.80
   6   0   6  221.28   10.70
   7   1   6   19.70    1.90
   7   1   6   19.00    2.20
   7   1   6   21.80    1.80
   8   2   6   15.10    1.90
   8   2   6   15.60    1.50
   8   2   6   14.10    1.10
  -8  -2  -6   14.30    1.50
   9   3   6  121.39    5.60
   9   3   6  119.69    6.10
   9   3   6  126.99    5.50
  -9  -3  -6  123.49    5.80
   2  -5   6    3.10    0.90
   2  -5   6    3.20    0.60
  -2   5  -6    2.30    0.80
   3  -4   6   85.99    4.40
  -3   4  -6   91.19    4.50
   4  -3   6  304.97   15.30
   4  -3   6  280.57   14.00
   4  -3   6  314.17   13.50
   5  -2   6  352.66   16.20
   5  -2   6  342.87   17.80
   5  -2   6  357.06   16.50
   6  -1   6   24.80    2.20
   6  -1   6   20.60    1.90
   7   0   6   -0.60    0.70
   7   0   6    0.20    0.80
   7   0   6   -0.20    0.90
   8   1   6    0.20    0.70
   9   2   6   93.29    4.50
   9   2   6   90.49    4.20
   9   2   6   89.59    5.00
  -9  -2  -6   86.19    4.40
 -10  -3  -6   93.79    4.30
   3  -5   6   57.69    2.80
   3  -5   6   60.59    3.10
  -3   5  -6   56.29    3.00
   4  -4   6    9.30    1.00
   4  -4   6    9.50    1.60
  -4   4  -6   10.50    1.20
   5  -3   6  706.23   32.00
   5  -3   6  712.03   32.40
   5  -3   6  732.33   32.00
  -5   3  -6  727.83   32.00
   6  -2   6  326.57   16.00
   6  -2   6  361.96   17.00
   7  -1   6   19.90    2.20
   7  -1   6   19.50    2.00
   8   0   6  588.54   25.00
   8   0   6  551.44   24.80
   8   0   6  476.05   24.50
   8   0   6  574.04   24.60
   9   1   6   22.40    1.80
   9   1   6   24.20    2.50
   9   1   6   22.40    1.70
  10   2   6  221.08   10.40
  10   2   6  228.18   10.00
 -10  -2  -6  210.08   10.30
   5  -4   6   54.69    3.70
   5  -4   6   56.39    3.10
   5  -4   6   56.89    2.80
  -5   4  -6   56.59    3.10
   6  -3   6   23.70    1.90
   6  -3   6   25.80    1.50
   6  -3   6   21.20    2.70
  -6   3  -6   22.40    1.90
   7  -2   6   19.40    1.80
   7  -2   6   18.70    2.30
   8  -1   6    1.10    1.60
   8  -1   6   -0.30    0.60
   9   0   6    0.60    1.10
   9   0   6   -0.60    0.80
   9   0   6    0.60    0.80
  10   1   6   26.40    1.90
  10   1   6   29.70    2.60
  10   1   6   30.20    2.00
  11   2   6   78.89    4.10
  11   2   6   80.19    3.80
   6  -4   6    9.70    0.80
   6  -4   6    9.50    1.30
  -6   4  -6    8.10    1.10
   7  -3   6  442.66   20.00
   7  -3   6  452.05   20.30
   8  -2   6   17.40    1.70
   8  -2   6   17.50    1.80
   9  -1   6   25.40    1.90
   9  -1   6   23.40    1.70
   9  -1   6   28.60    2.40
  10   0   6  771.02   34.20
  10   0   6  747.33   34.10
  10   0   6  783.52   34.50
  11   1   6  125.29    5.80
  11   1   6  117.59    6.10
   7  -4   6    1.90    1.00
   7  -4   6    2.00    0.50
  -7   4  -6    1.70    0.70
   8  -3   6    0.00    1.20
   9  -2   6   96.49    4.70
   9  -2   6  101.19    5.20
  10  -1   6   28.90    2.50
  10  -1   6   27.70    1.80
  10  -1   6   28.70    2.00
  11   0   6   -0.60    0.70
  11   0   6    0.60    0.60
  11   0   6   -0.50    0.90
  12   1   6   68.49    3.20
  12   1   6   63.99    3.40
   9  -3   6  126.89    5.80
   9  -3   6  123.79    6.00
  10  -2   6  230.18   10.50
  10  -2   6  235.48   10.80
  11  -1   6  118.49    5.60
  11  -1   6  120.59    5.60
  11  -1   6  121.29    5.90
  12   0   6  171.08    7.90
  12   0   6  172.38    7.70
  12   0   6  161.68    7.50
  10  -3   6  107.79    5.00
  10  -3   6  105.49    4.90
  11  -2   6   82.59    4.10
  11  -2   6   82.69    3.90
  12  -1   6   67.49    3.30
  12  -1   6   71.59    3.50
  11  -2  -7  129.09    5.60
  11  -2  -7  112.39    5.50
  10  -3  -7  190.28    8.50
  10  -3  -7  187.58    8.50
  11  -1  -7  107.59    5.10
  11  -1  -7  114.29    5.10
  10  -2  -7   25.60    1.70
  10  -2  -7   26.60    1.60
  10  -2  -7   24.20    1.50
   9  -3  -7   82.79    4.00
   9  -3  -7   82.09    4.00
   9  -3  -7   84.29    3.80
   8  -4  -7    9.90    1.00
   8  -4  -7   12.10    0.90
  12   1  -7   70.99    3.30
  12   1  -7   72.29    3.50
  11   0  -7  510.15   22.70
  11   0  -7  516.05   23.30
  11   0  -7  503.95   22.70
  10  -1  -7  113.39    5.50
  10  -1  -7  118.89    5.40
   9  -2  -7  104.99    4.90
   9  -2  -7   96.79    4.80
   9  -2  -7  102.79    4.80
   8  -3  -7  292.07   12.80
   8  -3  -7  277.57   12.70
   8  -3  -7  276.87   12.70
   7  -4  -7  208.28    9.20
   7  -4  -7  199.38    9.20
  11   1  -7  128.09    6.80
  11   1  -7  132.99    6.00
  11   1  -7  131.39    6.00
  10   0  -7   -0.10    0.60
  10   0  -7    0.40    0.80
  10   0  -7   -0.10    0.70
   9  -1  -7  232.68   10.40
   9  -1  -7  226.78   10.50
   8  -2  -7   54.79    3.00
   8  -2  -7   54.49    2.90
   8  -2  -7   57.39    2.80
   7  -3  -7  104.29    5.00
   7  -3  -7  103.09    4.90
   7  -3  -7  105.49    5.10
  -6   4   7   80.99    3.80
   6  -4  -7   78.29    4.00
   6  -4  -7   79.09    3.80
  11   2  -7  132.29    6.10
  11   2  -7  135.79    6.00
  11   2  -7  129.39    6.00
  10   1  -7  123.69    5.80
  10   1  -7  121.79    6.00
  10   1  -7  125.39    5.80
   9   0  -7 1580.94   70.89
   9   0  -7 1596.24   70.79
   9   0  -7 1625.14   70.79
   8  -1  -7  376.46   18.60
   8  -1  -7  368.76   17.00
   8  -1  -7  370.26   17.00
   8  -1  -7  399.06   17.60
   7  -2  -7   73.29    3.50
   7  -2  -7   67.99    3.50
   7  -2  -7   72.69    3.60
   6  -3  -7  108.59    5.20
   6  -3  -7  103.39    5.00
   6  -3  -7  104.39    5.00
  -5   4   7  130.99    6.00
   5  -4  -7  121.89    6.10
   5  -4  -7  123.89    5.80
   5  -4  -7  131.69    5.90
  10   2  -7   27.20    1.80
  10   2  -7   30.10    2.00
  10   2  -7   28.30    1.70
   9   1  -7  236.28   10.90
   9   1  -7  244.38   10.90
   9   1  -7  240.68   11.10
   8   0  -7   -1.20    0.60
   8   0  -7    0.10    1.10
   8   0  -7   -0.10    1.40
   7  -1  -7    8.00    1.20
   7  -1  -7    7.30    1.90
   7  -1  -7   10.20    1.40
   6  -2  -7    2.20    1.60
   6  -2  -7   -0.50    1.00
   5  -3  -7  124.19    5.70
   5  -3  -7  115.29    5.90
   5  -3  -7  117.99    5.60
   5  -3  -7  119.89    5.80
  -4   4   7   26.40    1.80
   4  -4  -7   24.70    1.60
   4  -4  -7   25.60    1.80
   4  -4  -7   23.70    2.10
   4  -4  -7   23.30    2.10
  -3   5   7   73.19    3.40
   3  -5  -7   68.39    3.30
   3  -5  -7   71.79    3.30
 -10  -3   7  187.08    9.00
  10   3  -7  206.48    9.00
  10   3  -7  201.48    9.10
  10   3  -7  213.68    9.10
   9   2  -7  119.49    5.80
   9   2  -7  122.09    5.60
   9   2  -7  118.39    5.60
   8   1  -7  380.26   17.70
   8   1  -7  405.66   18.30
   8   1  -7  390.56   17.50
   8   1  -7  392.66   17.50
   7   0  -7   52.69    4.20
   7   0  -7   57.89    3.60
   7   0  -7   55.79    3.50
   6  -1  -7  274.77   13.90
   6  -1  -7  303.87   13.80
   6  -1  -7  303.47   16.00
   6  -1  -7  311.57   13.90
   5  -2  -7  250.97   12.00
   5  -2  -7  269.07   12.80
   4  -3  -7   13.50    1.20
   4  -3  -7   12.60    1.50
   4  -3  -7   12.60    2.10
   4  -3  -7    9.30    2.00
   4  -3  -7   16.00    1.50
  -3   4   7   14.50    1.50
   3  -4  -7   14.90    1.20
   3  -4  -7   13.40    1.30
   3  -4  -7   14.60    1.40
  -2   5   7   58.99    2.80
   2  -5  -7   49.00    2.70
   2  -5  -7   51.09    2.70
   2  -5  -7   61.39    2.60
  -9  -3   7   95.79    4.50
   9   3  -7   94.09    4.40
   9   3  -7   91.69    4.50
   9   3  -7   97.39    4.40
  -8  -2   7   61.69    3.20
   8   2  -7   68.09    3.30
   8   2  -7   65.59    3.50
   8   2  -7   62.39    3.10
   8   2  -7   66.59    3.30
   7   1  -7   10.10    1.20
   7   1  -7    8.30    1.50
   6   0  -7    0.90    1.20
   6   0  -7   -0.20    0.50
   6   0  -7    0.70    0.80
   6   0  -7    1.30    0.90
   5  -1  -7    6.50    0.60
   5  -1  -7    6.20    0.90
   5  -1  -7    6.40    1.40
   5  -1  -7    6.70    0.90
   4  -2  -7   67.39    3.80
   4  -2  -7   74.69    4.60
   3  -3  -7   10.30    1.80
  -2   4   7    1.30    0.80
   2  -4  -7    2.30    0.80
   2  -4  -7    2.20    0.90
   2  -4  -7    2.00    0.70
  -1   5   7    1.40    0.70
   1  -5  -7    1.10    0.60
   1  -5  -7    0.40    0.50
  -8  -3   7  344.07   15.00
   8   3  -7  325.27   15.00
   8   3  -7  331.77   15.00
   8   3  -7  335.07   15.00
   7   2  -7   81.19    4.00
   7   2  -7   82.79    4.20
   7   2  -7   86.69    4.10
   6   1  -7  314.17   14.40
   5   0  -7  388.36   17.70
   5   0  -7  375.36   17.20
   5   0  -7  381.26   17.50
   4  -1  -7  857.71   34.60
   4  -1  -7  760.72   34.40
   4  -1  -7  715.13   34.00
   4  -1  -7  739.63   34.20
   3  -2  -7 1596.54   70.79
   3  -2  -7 1594.44   71.09
   2  -3  -7  486.75   21.40
   2  -3  -7  454.65   21.90
  -1   4   7   23.00    2.20
   1  -4  -7   19.70    2.10
   1  -4  -7   21.10    2.10
   0   5   7  292.67   13.30
   0  -5  -7  299.07   13.30
  -8  -4   7   12.50    0.90
   8   4  -7   11.50    0.90
   8   4  -7   12.00    0.90
   8   4  -7   11.10    0.70
  -7  -3   7  128.79    5.70
   7   3  -7  119.79    5.60
   7   3  -7  115.69    5.70
   7   3  -7  116.29    5.60
   6   2  -7   -0.70    0.90
   6   2  -7    0.70    0.70
   5   1  -7    5.70    0.80
   5   1  -7    7.20    1.10
   5   1  -7    6.50    1.10
   4   0  -7   -0.10    0.90
   4   0  -7   -0.10    0.60
   4   0  -7    0.00    0.30
   4   0  -7    0.40    0.60
   3  -1  -7   24.80    2.30
   3  -1  -7   26.40    1.70
   3  -1  -7   24.40    1.60
   2  -2  -7   42.10    2.50
   2  -2  -7   37.90    3.00
   1  -3  -7   56.59    3.40
   1  -3  -7   49.90    3.70
   0   4   7   44.30    2.80
   0  -4  -7   46.10    2.80
   1   5   7  108.19    4.80
   1   5   7   90.79    4.80
  -1  -5  -7  110.39    4.90
  -7  -4   7  222.98    9.70
   7   4  -7  211.58    9.60
   7   4  -7  206.68    9.60
  -6  -3   7  128.29    5.90
   6   3  -7  129.19    5.80
   6   3  -7  124.29    5.90
   6   3  -7  117.89    5.90
   5   2  -7  271.57   12.80
   5   2  -7  265.47   12.50
   4   1  -7  745.43   34.50
   4   1  -7  789.22   34.70
   4   1  -7  777.32   34.40
   3   0  -7 1636.14   66.19
   3   0  -7 1383.86   65.79
   3   0  -7 1513.55   65.89
   3   0  -7 1420.96   66.09
   2  -1  -7 1067.69   48.30
   2  -1  -7 1108.39   48.20
   2  -1  -7 1088.49   48.40
   1  -2  -7  432.96   19.00
   1  -2  -7  409.16   19.30
   0  -3  -7  621.74   28.50
   0  -3  -7  614.34   27.90
   1   4   7  462.05   20.10
   1   4   7  442.86   20.20
  -1  -4  -7  416.96   19.90
  -1  -4  -7  461.85   20.20
   2   5   7    5.50    0.70
   2   5   7    9.30    0.80
  -2  -5  -7    8.60    0.80
  -6  -4   7   86.59    4.00
   6   4  -7   81.59    3.90
   6   4  -7   81.89    4.00
  -5  -3   7  137.39    6.40
   5   3  -7  134.49    6.40
   4   2  -7   68.19    3.70
   4   2  -7   64.59    3.80
   3   1  -7   24.30    1.50
   3   1  -7   23.10    1.80
   3   1  -7   25.50    1.90
   2   0  -7    0.30    0.30
   2   0  -7    0.30    0.70
   2   0  -7    0.00    0.40
   2   0  -7   -0.10    0.50
   1  -1  -7  163.88    7.70
   1  -1  -7  175.68    8.10
   0  -2  -7  155.88    7.70
   0  -2  -7  169.08    7.60
  -1  -3  -7  358.56   16.50
   2   4   7    9.10    1.00
   2   4   7   12.10    1.20
  -2  -4  -7    7.60    1.10
  -2  -4  -7    8.50    1.00
   3   5   7   17.90    1.20
  -3  -5  -7   17.60    1.20
  -5  -4   7  131.49    6.00
   5   4  -7  127.09    6.00
   5   4  -7  122.39    5.90
  -4  -3   7   15.20    1.30
   4   3  -7   12.30    1.40
   4   3  -7   17.10    1.40
   3   2  -7 1444.76   65.39
   3   2  -7 1492.75   65.29
   2   1  -7 1049.99   48.90
   2   1  -7 1173.28   48.70
   2   1  -7 1071.49   48.70
  -1   0   7   46.00    2.40
   1   0  -7   50.99    2.70
   1   0  -7   53.39    2.90
   1   0  -7   56.89    2.50
   0  -1  -7  584.44   25.50
   0  -1  -7  559.24   25.40
  -1  -2  -7  566.44   27.50
  -1  -2  -7  665.83   27.60
  -2  -3  -7   53.29    3.40
   3   4   7  257.27   11.70
   3   4   7  266.57   11.80
  -3  -4  -7  253.47   11.80
  -3  -4  -7  249.58   11.80
  -4  -4   7   25.70    1.80
   4   4  -7   25.70    1.80
   3   3  -7    8.90    1.20
   2   2  -7   35.90    2.40
   2   2  -7   37.40    2.20
  -1  -1   7  171.78    7.40
   1   1  -7  156.08    7.70
   0   0   7    0.10    0.40
   0   0  -7   -0.10    0.30
  -1  -1  -7  519.05   23.20
  -2  -2  -7  900.71   40.10
   3   3   7   -0.40    1.30
  -3  -3  -7   -1.20    0.90
   4   4   7   14.90    1.50
  -4  -4  -7   14.60    1.40
  -4  -4  -7   12.70    1.30
  -3  -4   7   15.90    1.40
  -3  -4   7   15.80    1.40
   3   4  -7   14.60    1.30
   3   4  -7   16.30    1.50
   2   3  -7  521.05   23.70
   1   2  -7  357.46   16.90
   1   2  -7  388.16   16.90
   0  -1   7  673.33   28.30
   0  -1   7  604.24   28.20
   0   1  -7  632.24   28.50
   1   0   7 1187.88   52.59
   2   1   7  607.54   26.30
   2   1   7  567.24   26.10
   3   2   7   20.00    2.40
   3   2   7   18.70    1.20
   4   3   7   13.00    1.40
   4   3   7   10.20    1.50
  -4  -3  -7   12.60    1.20
   5   4   7   35.60    2.10
  -5  -4  -7   35.40    2.20
  -3  -5   7   69.39    3.30
   3   5  -7   69.79    3.30
  -2  -4   7    1.50    0.90
  -2  -4   7    1.10    0.60
   2   4  -7    3.20    1.00
   2   4  -7    2.20    0.80
  -1  -3   7   50.29    4.50
   1   3  -7   60.19    3.30
   0  -2   7  142.39    6.40
   0   2  -7  132.69    6.50
   1  -1   7  606.94   26.70
   1  -1   7  591.14   26.70
   2   0   7   -0.10    0.50
   2   0   7   -0.20    0.40
   3   1   7  309.77   14.10
   3   1   7  302.27   13.90
   3   1   7  313.77   14.00
   4   2   7   44.20    3.20
   4   2   7   43.20    2.40
   4   2   7   43.40    2.60
   5   3   7    5.20    1.40
   5   3   7    3.80    0.80
  -5  -3  -7    4.40    0.90
   6   4   7    4.30    0.70
  -6  -4  -7    4.30    0.80
  -2  -5   7   54.49    2.80
   2   5  -7   56.69    2.80
  -1  -4   7   20.60    1.70
   1   4  -7   24.20    2.00
   0  -3   7  564.04   26.60
   0   3  -7  561.84   25.50
   1  -2   7  599.74   26.40
   1  -2   7  654.83   27.40
  -1   2  -7  523.65   26.50
   2  -1   7  594.64   24.50
   2  -1   7  544.75   24.60
   2  -1   7  509.05   24.80
   3   0   7   20.10    1.50
   3   0   7   20.20    1.40
   4   1   7 1469.55   62.99
   4   1   7 1360.86   62.39
   4   1   7 1384.46   62.29
   5   2   7   22.70    1.60
   5   2   7   24.70    2.60
   6   3   7 1077.69   47.00
   6   3   7 1035.10   47.80
  -6  -3  -7 1056.19   47.10
   7   4   7   14.70    1.10
  -7  -4  -7   13.40    1.20
  -1  -5   7    1.10    0.70
   1   5  -7    1.10    0.80
   1   5  -7    2.00    0.60
   0  -4   7   50.59    3.10
   0   4  -7   52.59    3.20
   0   4  -7   45.10    2.80
   1  -3   7  366.96   17.50
  -1   3  -7  344.77   16.30
   2  -2   7  991.80   43.30
   2  -2   7  922.31   42.90
   2  -2   7 1042.40   43.70
  -2   2  -7  902.81   43.00
   3  -1   7  281.47   13.10
   3  -1   7  272.87   13.00
   3  -1   7  294.27   12.90
   4   0   7    0.10    0.50
   4   0   7   -1.00    0.60
   4   0   7    0.00    0.70
   5   1   7  441.46   19.50
   5   1   7  431.76   19.70
   5   1   7  425.06   19.60
   6   2   7    3.50    1.40
   6   2   7    3.10    0.80
   7   3   7    4.60    1.40
   7   3   7    3.60    0.70
  -7  -3  -7    3.10    0.90
   0  -5   7  304.87   12.90
   0   5  -7  267.97   12.90
   1  -4   7  536.65   24.70
  -1   4  -7  561.44   24.70
   2  -3   7   48.10    4.40
   3  -2   7   19.90    1.70
   3  -2   7   23.10    2.00
   3  -2   7   26.20    2.70
   4  -1   7 1370.46   60.39
   4  -1   7 1357.16   60.39
   4  -1   7 1343.27   60.29
   5   0   7   15.10    1.50
   5   0   7   14.30    1.60
   5   0   7   14.60    1.40
   6   1   7  108.19    5.40
   6   1   7  103.59    5.60
   6   1   7  109.29    5.40
   7   2   7   20.30    1.50
   7   2   7   21.00    2.10
   7   2   7   18.40    1.40
  -7  -2  -7   17.60    1.60
   8   3   7  350.66   15.60
   8   3   7  333.67   16.80
  -8  -3  -7  362.06   16.00
   1  -5   7  107.39    4.90
  -1   5  -7  101.29    5.00
   2  -4   7    7.80    1.10
  -2   4  -7   11.10    1.30
   3  -3   7    3.20    0.90
   3  -3   7   -1.40    1.20
   4  -2   7   44.60    3.40
   4  -2   7   41.00    2.90
   5  -1   7  426.56   19.40
   5  -1   7  427.46   19.60
   6   0   7   -1.00    0.70
   6   0   7   -0.60    0.70
   6   0   7    0.40    0.70
   7   1   7   46.30    3.20
   7   1   7   43.90    2.80
   8   2   7    4.00    2.30
   8   2   7    3.00    0.60
   8   2   7    3.50    1.10
  -8  -2  -7    2.60    0.80
   9   3   7    8.70    0.60
   9   3   7   10.00    0.90
  -9  -3  -7    7.30    0.80
   2  -5   7    8.40    1.00
   2  -5   7    8.40    0.70
  -2   5  -7    6.50    1.00
   3  -4   7  286.37   12.90
  -3   4  -7  282.37   12.90
   4  -3   7   12.60    1.10
   4  -3   7   14.00    1.40
  -4   3  -7   16.30    1.60
   5  -2   7   26.60    2.20
   5  -2   7   23.60    2.50
   5  -2   7   30.60    2.90
   6  -1   7  111.89    5.60
   6  -1   7  104.09    5.70
   7   0   7  896.81   40.70
   7   0   7  918.61   40.70
   8   1   7  219.48   10.20
   8   1   7  222.98   10.70
   8   1   7  234.88   10.30
   8   1   7  214.78   10.10
   9   2   7   12.30    1.20
   9   2   7   15.60    1.40
   9   2   7   12.90    1.70
  -9  -2  -7   11.90    1.40
   3  -5   7   18.40    1.50
   3  -5   7   17.70    1.10
  -3   5  -7   15.70    1.50
   4  -4   7   14.70    1.50
   4  -4   7   15.90    1.80
  -4   4  -7   17.20    1.90
   5  -3   7    3.60    1.40
   5  -3   7    4.70    0.90
   5  -3   7    3.80    0.70
  -5   3  -7    5.30    1.00
   6  -2   7    4.30    1.10
   6  -2   7    3.80    1.30
   7  -1   7   45.70    3.30
   7  -1   7   48.20    3.30
   8   0   7   -0.70    1.00
   8   0   7    0.40    0.80
   8   0   7   -0.40    0.70
   9   1   7  113.39    6.20
   9   1   7  110.49    5.30
  10   2   7    2.70    1.10
  10   2   7    2.30    0.70
 -10  -2  -7    2.10    0.60
   5  -4   7   31.70    2.70
   5  -4   7   36.00    1.90
   5  -4   7   29.80    1.90
  -5   4  -7   34.30    2.40
   6  -3   7 1095.99   49.10
   6  -3   7 1114.29   49.60
  -6   3  -7 1109.19   49.30
   7  -2   7   20.80    1.80
   7  -2   7   19.10    2.20
   8  -1   7  237.58   11.20
   8  -1   7  239.28   11.00
   8  -1   7  243.18   10.90
   9   0   7  177.38    8.10
   9   0   7  172.18    8.00
   9   0   7  168.68    8.40
  10   1   7  189.68    9.20
  10   1   7  193.48    8.90
  11   2   7  194.18    8.90
  11   2   7  198.48    9.10
   6  -4   7    4.10    1.10
   6  -4   7    5.30    0.60
  -6   4  -7    3.90    1.10
   7  -3   7    3.70    1.20
   7  -3   7    2.20    0.80
  -7   3  -7    0.50    1.00
   9  -1   7  126.39    6.50
   9  -1   7  120.09    6.00
   9  -1   7  121.39    5.80
  10   0   7   -0.40    0.70
  10   0   7   -0.40    0.70
  10   0   7    0.70    1.10
  11   1   7   89.79    4.30
  11   1   7   87.19    4.60
   7  -4   7   13.30    1.40
   7  -4   7   12.00    0.90
  -7   4  -7   13.40    1.30
   8  -3   7  411.16   17.50
   8  -3   7  361.96   17.60
   9  -2   7   13.60    1.60
   9  -2   7   13.00    1.10
  10  -1   7  191.68    9.00
  10  -1   7  183.48    8.70
  10  -1   7  192.28    8.70
  11   0   7   13.80    1.30
  11   0   7   12.10    1.40
  11   0   7   12.70    1.30
   9  -3   7    9.20    0.80
   9  -3   7    6.80    1.00
  10  -2   7    3.80    0.80
  10  -2   7    1.30    1.00
  11  -1   7   89.89    4.30
  11  -1   7   88.89    4.20
  11  -1   7   90.99    4.60
  12   0   7   -0.80    0.40
  12   0   7   -0.50    0.70
  11  -2   7  204.28    9.10
  11  -2   7  200.18    9.30
  12  -1  -8    0.80    0.40
  12  -1  -8    0.50    0.30
  11  -2  -8   11.10    0.90
  11  -2  -8   14.00    1.00
  10  -3  -8   68.99    3.10
  10  -3  -8   62.19    3.10
  12   0  -8  372.56   15.90
  12   0  -8  360.76   15.80
  12   0  -8  331.37   15.90
  11  -1  -8   84.19    3.80
  11  -1  -8   77.79    3.80
  10  -2  -8   88.89    4.30
  10  -2  -8   93.39    4.20
  10  -2  -8   86.19    4.20
   9  -3  -8   52.79    2.60
   9  -3  -8   52.79    2.70
   9  -3  -8   51.49    2.50
   8  -4  -8    9.40    0.90
   8  -4  -8    9.70    0.90
  12   1  -8    0.50    0.40
  12   1  -8    0.40    0.50
  12   1  -8    0.30    0.30
  11   0  -8    1.90    0.70
  11   0  -8    0.70    0.80
  11   0  -8    2.30    0.80
  10  -1  -8   42.20    2.40
  10  -1  -8   42.50    2.30
   9  -2  -8   52.09    2.70
   9  -2  -8   54.19    2.80
   9  -2  -8   50.39    2.70
   8  -3  -8    4.70    0.90
   8  -3  -8    4.60    0.90
   7  -4  -8    1.70    0.60
   7  -4  -8    0.90    0.70
  11   1  -8   87.69    4.40
  11   1  -8   93.39    4.30
  11   1  -8   89.49    4.30
  10   0  -8  175.68    7.90
  10   0  -8  168.38    7.90
  10   0  -8  174.68    8.10
   9  -1  -8   33.50    2.20
   9  -1  -8   36.30    2.00
   8  -2  -8  147.39    7.00
   8  -2  -8  150.98    7.10
   8  -2  -8  157.58    7.00
   7  -3  -8  547.45   24.20
   7  -3  -8  547.15   24.10
   7  -3  -8  527.15   24.10
   6  -4  -8  201.78    8.90
   6  -4  -8  190.68    9.00
  11   2  -8   19.50    1.30
  11   2  -8   18.30    1.80
  11   2  -8   17.60    1.20
  10   1  -8   44.60    2.40
  10   1  -8   43.70    2.70
  10   1  -8   43.40    2.40
   9   0  -8    0.50    0.80
   9   0  -8    1.10    0.70
   9   0  -8   -1.00    0.70
   8  -1  -8  465.45   20.30
   8  -1  -8  444.56   20.40
   7  -2  -8   44.10    2.50
   7  -2  -8   37.40    2.40
   6  -3  -8   65.09    3.30
   6  -3  -8   66.99    3.30
   6  -3  -8   59.89    3.50
  -5   4   8  114.49    5.20
   5  -4  -8  109.99    4.90
   5  -4  -8   99.89    5.60
  10   2  -8   94.99    4.90
  10   2  -8  107.39    4.80
   9   1  -8   37.70    2.20
   9   1  -8   37.10    2.20
   9   1  -8   39.10    2.50
   8   0  -8  703.93   31.80
   8   0  -8  682.43   31.30
   7  -1  -8   57.29    3.50
   7  -1  -8   52.99    4.80
   7  -1  -8   58.19    3.50
   6  -2  -8  229.38   12.20
  -5   3   8  225.38   10.00
   5  -3  -8  239.48   10.00
   5  -3  -8  198.18    9.90
   5  -3  -8  207.78   10.10
   5  -3  -8  216.18    9.80
  -4   4   8  541.95   23.20
   4  -4  -8  481.85   23.20
   4  -4  -8  537.45   23.10
   4  -4  -8  511.15   23.10
  -3   5   8   38.60    2.10
   3  -5  -8   40.80    1.90
   3  -5  -8   39.50    1.90
 -10  -3   8   64.89    3.20
  10   3  -8   74.59    3.30
  10   3  -8   71.39    3.30
   9   2  -8   57.59    3.20
   9   2  -8   56.59    3.00
   9   2  -8   61.09    3.00
   8   1  -8  484.85   21.20
   8   1  -8  473.85   21.40
   8   1  -8  464.85   21.10
   7   0  -8   -1.20    1.20
   7   0  -8   -0.90    1.00
   7   0  -8   -0.50    0.80
   7   0  -8   -0.10    0.60
   6  -1  -8   -0.50    0.60
   6  -1  -8    0.60    0.80
   6  -1  -8    1.20    1.40
   5  -2  -8  117.59    6.70
   5  -2  -8  112.99    5.80
  -4   3   8  769.02   32.40
   4  -3  -8  681.73   32.20
   4  -3  -8  740.53   32.20
   4  -3  -8  707.83   32.30
  -3   4   8    5.00    0.90
   3  -4  -8    4.80    0.80
   3  -4  -8    5.30    1.00
   3  -4  -8    5.90    0.90
  -2   5   8   10.30    1.10
   2  -5  -8    9.50    0.80
   2  -5  -8   12.20    0.90
  -9  -3   8   59.99    3.00
   9   3  -8   61.99    2.90
   9   3  -8   59.79    2.90
   9   3  -8   58.99    3.00
  -8  -2   8  172.98    8.00
   8   2  -8  180.78    8.00
   8   2  -8  166.78    7.80
   8   2  -8  172.48    8.00
   8   2  -8  175.98    8.20
   7   1  -8   63.29    3.60
   7   1  -8   64.59    4.10
   6   0  -8 1345.07   60.29
   6   0  -8 1384.56   60.79
   6   0  -8 1374.96   60.39
   6   0  -8 1328.47   60.89
   5  -1  -8  399.56   19.10
   5  -1  -8  418.66   19.40
   5  -1  -8  456.25   19.80
   4  -2  -8  180.88    8.60
   3  -3  -8   22.90    3.10
   3  -3  -8   21.30    2.30
  -2   4   8   96.09    4.70
   2  -4  -8   92.39    4.60
   2  -4  -8   87.79    4.60
   2  -4  -8   94.59    4.60
  -1   5   8  335.07   14.50
   1  -5  -8  313.87   14.40
   1  -5  -8  318.47   14.30
  -8  -3   8    6.30    0.90
   8   3  -8    5.90    0.70
   8   3  -8    6.30    0.90
   8   3  -8    6.00    0.80
  -7  -2   8   40.70    2.20
   7   2  -8   40.90    2.20
   6   1  -8    0.30    0.60
   6   1  -8    0.00    0.90
   5   0  -8   -0.20    0.40
   5   0  -8    0.90    0.80
   5   0  -8    0.20    1.10
   5   0  -8    0.80    0.80
   4  -1  -8    4.10    0.50
   4  -1  -8    5.80    0.90
   4  -1  -8    5.20    0.80
   4  -1  -8    6.00    1.30
   3  -2  -8   30.90    2.20
   3  -2  -8   32.50    2.90
   2  -3  -8    2.80    1.30
  -1   4   8   33.90    2.30
   1  -4  -8   34.70    2.20
   0   5   8    0.90    0.60
   0  -5  -8    0.60    0.60
  -8  -4   8   12.00    0.90
   8   4  -8   10.40    0.80
   8   4  -8   12.60    0.90
  -7  -3   8  641.44   27.60
   7   3  -8  595.84   27.60
   7   3  -8  620.64   27.50
   7   3  -8  618.34   27.50
   6   2  -8  221.58   11.20
   6   2  -8  232.88   11.00
   5   1  -8  352.16   18.30
   5   1  -8  420.86   18.20
   5   1  -8  432.16   18.70
   4   0  -8 6925.81  286.47
   4   0  -8 6514.65  286.37
   4   0  -8 6012.60  285.97
   3  -1  -8  351.06   15.20
   3  -1  -8  346.17   15.40
   3  -1  -8  316.27   15.80
   2  -2  -8 1392.46   63.09
   2  -2  -8 1439.46   62.79
   1  -3  -8  149.09    7.10
   1  -3  -8  135.59    7.40
   0   4   8  249.38   11.40
   0  -4  -8  244.18   11.40
   1   5   8   53.49    2.60
  -1  -5  -8   51.89    2.70
  -7  -4   8    1.40    0.60
   7   4  -8    2.30    0.50
   7   4  -8    2.00    0.70
  -6  -3   8   75.79    3.70
   6   3  -8   70.19    3.70
   6   3  -8   72.89    3.60
   6   3  -8   74.09    3.60
   5   2  -8  116.49    5.90
   5   2  -8  116.99    6.20
   4   1  -8    7.00    1.10
   4   1  -8    5.10    0.80
   4   1  -8    4.00    1.00
   3   0  -8    0.20    0.60
   3   0  -8   -0.10    0.90
   3   0  -8   -0.10    0.30
   3   0  -8   -0.30    0.50
   2  -1  -8  297.37   13.30
   2  -1  -8  299.67   13.60
   2  -1  -8  287.77   13.50
   1  -2  -8    3.70    1.00
   1  -2  -8    4.60    0.60
   1  -2  -8    5.60    0.90
   0  -3  -8  326.87   15.10
   1   4   8    8.00    1.00
   1   4   8    9.90    1.10
  -1  -4  -8    8.30    0.90
  -1  -4  -8    8.20    1.10
   2   5   8   41.60    2.00
  -2  -5  -8   39.20    2.20
  -6  -4   8  218.98    9.70
   6   4  -8  208.78    9.60
   6   4  -8  213.18    9.70
  -5  -3   8  243.08   11.00
   5   3  -8  239.98   11.00
   4   2  -8  175.48    8.90
   4   2  -8  186.88    8.70
   3   1  -8  340.37   15.40
   3   1  -8  339.47   15.60
   2   0  -8  606.14   29.10
   2   0  -8  683.13   29.40
   2   0  -8  624.04   29.30
   2   0  -8  707.13   29.10
   1  -1  -8  144.19    6.60
   1  -1  -8  142.39    6.80
   0  -2  -8 1329.27   62.09
   0  -2  -8 1465.45   61.99
  -1  -3  -8   97.79    5.20
   2   4   8  112.19    5.30
   2   4   8  105.69    5.20
  -2  -4  -8  102.49    5.20
  -2  -4  -8  109.89    5.40
  -5  -4   8  116.29    5.60
   5   4  -8  109.89    5.50
   5   4  -8  110.99    5.20
  -4  -3   8  828.72   36.60
   4   3  -8  814.62   36.50
   3   2  -8   26.30    2.10
   3   2  -8   29.10    2.00
  -2  -1   8  269.37   12.30
   2   1  -8  275.67   12.70
   2   1  -8  278.37   12.50
   2   1  -8  280.67   12.50
  -1   0   8    0.60    0.30
   1   0  -8    0.00    0.50
   1   0  -8   -0.20    0.40
   0  -1  -8  624.04   29.90
   0  -1  -8  717.23   29.80
  -1  -2  -8  430.06   20.90
  -1  -2  -8  499.15   20.90
   2   3   8    4.70    1.60
  -2  -3  -8    6.10    1.30
   3   4   8   17.40    1.60
   3   4   8   17.30    1.40
  -3  -4  -8   12.60    1.30
  -3  -4  -8   15.00    1.50
  -4  -4   8  556.04   24.50
   4   4  -8  541.75   24.50
   3   3  -8   20.80    2.00
   2   2  -8 1318.17   57.89
   2   2  -8 1285.87   58.19
  -1  -1   8  153.58    6.80
   1   1  -8  142.99    7.10
   0   0   8  225.48   10.30
   0   0  -8  234.38   10.30
   1   1   8 3525.25  142.89
  -1  -1  -8 2944.71  142.69
   2   2   8 2052.39   94.29
  -2  -2  -8 2197.58   94.09
   3   3   8  316.47   14.00
  -3  -3  -8  301.87   14.00
  -3  -3  -8  303.27   14.50
   4   4   8   19.40    1.50
  -4  -4  -8   13.30    1.50
  -4  -4  -8   14.90    1.60
  -3  -4   8    4.90    0.90
  -3  -4   8    5.60    0.80
   3   4  -8    4.90    1.10
   3   4  -8    3.10    0.80
   2   3  -8    3.50    0.90
   1   2  -8    3.90    0.70
   1   2  -8    4.20    0.80
   0  -1   8  650.73   30.10
   0   1  -8  707.03   30.40
   1   0   8   -0.30    0.40
   2   1   8    9.60    1.10
  -2  -1  -8    8.10    0.70
   3   2   8   16.60    1.90
  -3  -2  -8   21.60    1.80
   4   3   8  386.66   17.50
  -4  -3  -8  386.26   17.60
   5   4   8   12.00    1.30
  -5  -4  -8   11.30    1.10
  -3  -5   8   43.50    2.10
  -3  -5   8   37.30    2.10
   3   5  -8   41.00    2.10
  -2  -4   8  104.19    5.00
  -2  -4   8   97.19    4.80
   2   4  -8   98.89    5.00
   2   4  -8  104.59    4.90
  -1  -3   8  126.39    8.00
   1   3  -8  140.29    6.70
   0   2  -8 1199.38   53.39
   1  -1   8 2875.41  131.09
   1  -1   8 3060.99  131.09
   2   0   8  994.30   42.20
   2   0   8  905.81   42.20
   3   1   8  144.49    6.70
   3   1   8  151.88    6.80
   3   1   8  151.38    7.00
  -3  -1  -8  127.99    6.60
   4   2   8  698.53   31.10
   4   2   8  695.43   30.70
  -4  -2  -8  660.23   30.70
   5   3   8  100.69    5.40
   5   3   8   98.69    4.90
  -5  -3  -8   95.99    4.90
   6   4   8  126.29    5.60
  -6  -4  -8  114.39    5.70
  -2  -5   8   11.10    1.10
   2   5  -8   10.40    1.00
  -1  -4   8   35.00    2.10
  -1  -4   8   40.30    2.40
   1   4  -8   37.40    2.30
   1   4  -8   36.10    2.50
   0  -3   8  321.97   16.20
   0   3  -8  326.37   15.00
   1  -2   8  506.25   22.10
   1  -2   8  523.95   22.40
  -1   2  -8  408.06   21.60
   2  -1   8    9.90    1.20
   2  -1   8    8.90    1.40
   2  -1   8    8.70    0.90
   3   0   8    0.10    0.60
   4   1   8  265.87   12.20
   4   1   8  261.87   12.40
   4   1   8  274.67   12.30
   5   2   8   48.90    3.40
   5   2   8   60.19    3.80
  -5  -2  -8   52.39    3.10
   6   3   8  218.38   10.10
   6   3   8  200.78    9.50
  -6  -3  -8  202.58    9.60
   7   4   8   28.20    1.50
  -7  -4  -8   24.80    1.60
  -1  -5   8  343.97   13.90
   1   5  -8  269.07   13.90
   1   5  -8  318.07   13.90
   0  -4   8  296.57   13.00
   0   4  -8  313.17   13.00
   0   4  -8  248.18   13.00
   1  -3   8   93.59    6.30
   2  -2   8 1841.02   83.09
   2  -2   8 1875.71   82.99
   2  -2   8 1987.50   83.79
  -2   2  -8 1788.42   83.09
   3  -1   8  132.69    6.50
   3  -1   8  116.59    6.70
   3  -1   8  141.59    6.30
   4   0   8 1688.13   74.99
   4   0   8 1690.63   74.89
   5   1   8  117.59    5.70
   5   1   8  116.09    6.20
   5   1   8  118.79    5.80
   6   2   8   24.90    2.60
   6   2   8   28.40    1.80
  -6  -2  -8   28.90    2.00
   7   3   8  205.68    9.80
   7   3   8  206.68    9.30
  -7  -3  -8  195.58    9.40
   0  -5   8   -0.40    0.60
   0   5  -8    1.10    0.80
   1  -4   8   10.40    1.20
  -1   4  -8   10.60    1.30
   2  -3   8    3.90    1.80
   3  -2   8   16.40    1.70
   3  -2   8   18.00    1.80
   3  -2   8   23.00    2.60
   4  -1   8  250.67   11.70
   4  -1   8  238.28   11.60
   4  -1   8  257.67   11.50
   5   0   8    0.20    0.80
   5   0   8    1.30    0.80
   6   1   8   53.19    3.50
   6   1   8   58.69    3.20
   6   1   8   54.59    3.20
   7   2   8    9.80    1.60
   7   2   8    7.50    0.90
   7   2   8    8.30    1.00
  -7  -2  -8    6.20    1.00
   8   3   8   45.00    3.00
   8   3   8   45.10    2.30
   8   3   8   47.10    2.40
  -8  -3  -8   47.60    2.60
   1  -5   8   54.79    2.90
   1  -5   8   57.59    2.80
  -1   5  -8   53.19    2.90
   2  -4   8  136.69    6.50
  -2   4  -8  137.79    6.60
   3  -3   8  303.07   17.50
   3  -3   8  408.96   16.20
  -3   3  -8  364.36   16.20
   4  -2   8  716.53   30.80
   4  -2   8  627.84   30.40
   4  -2   8  668.23   30.20
   5  -1   8  128.19    6.40
   5  -1   8  116.29    6.20
   6   0   8  311.67   14.40
   6   0   8  303.97   14.20
   7   1   8   32.20    2.80
   7   1   8   38.00    2.50
   7   1   8   31.10    2.80
   8   2   8   10.50    1.60
   8   2   8   13.10    1.40
   8   2   8    9.50    1.00
  -8  -2  -8    9.90    1.10
  -9  -3  -8   15.90    1.20
   2  -5   8   47.00    2.40
   2  -5   8   44.10    2.20
  -2   5  -8   39.70    2.50
   3  -4   8   20.70    1.80
   3  -4   8   19.80    2.40
  -3   4  -8   21.80    2.10
   4  -3   8  453.35   20.00
   4  -3   8  467.15   20.10
   4  -3   8  446.66   20.30
  -4   3  -8  421.96   20.10
   5  -2   8   63.69    3.70
   5  -2   8   59.99    4.20
   5  -2   8   58.39    4.00
   6  -1   8   54.09    3.50
   6  -1   8   55.79    3.40
   7   0   8   -0.50    0.90
   8   1   8    7.70    1.00
   8   1   8    5.10    0.90
   8   1   8    6.10    0.70
   8   1   8   10.00    1.50
  -8  -1  -8    7.00    0.90
   9   2   8   89.19    4.80
   9   2   8   87.19    4.00
  -9  -2  -8   85.19    4.60
   4  -4   8   18.50    1.60
   4  -4   8   18.00    2.30
  -4   4  -8   18.80    1.60
   5  -3   8  109.39    5.00
   5  -3   8  105.09    5.60
   5  -3   8  103.19    5.10
  -5   3  -8  104.89    5.20
   6  -2   8   29.00    2.60
   6  -2   8   31.30    2.00
   7  -1   8   35.80    2.70
   7  -1   8   35.40    2.90
   8   0   8  199.88    9.80
   8   0   8  206.48    9.40
   8   0   8  212.28    9.60
   9   1   8  247.88   11.70
   9   1   8  258.07   12.20
   9   1   8  269.37   11.80
  10   2   8  161.88    7.70
  10   2   8  164.78    7.40
 -10  -2  -8  153.08    7.30
   5  -4   8   16.50    1.20
   5  -4   8   12.40    1.50
  -5   4  -8   12.80    1.50
   6  -3   8  224.98   10.00
   6  -3   8  219.28    9.90
   6  -3   8  219.38   10.40
  -6   3  -8  212.58   10.20
   7  -2   8   10.40    1.50
   7  -2   8   11.50    1.10
   8  -1   8    6.20    1.00
   8  -1   8    7.10    1.00
   8  -1   8    6.10    1.30
   9   0   8   -0.60    1.40
  10   1   8   11.10    1.00
  10   1   8    9.60    1.70
   6  -4   8  122.09    5.60
   6  -4   8  118.59    5.20
  -6   4  -8  102.49    5.60
   7  -3   8  205.88    9.40
   7  -3   8  205.48    9.10
  -7   3  -8  187.78    9.40
   8  -2   8   10.90    1.50
   8  -2   8   12.20    1.10
   9  -1   8  280.37   12.50
   9  -1   8  278.27   12.90
   9  -1   8  269.87   12.50
  10   0   8  168.18    8.00
  10   0   8  164.88    7.70
  10   0   8  164.18    7.60
  11   1   8   16.80    1.40
  11   1   8   14.80    1.70
   7  -4   8   25.30    1.40
   7  -4   8   27.90    1.80
  -7   4  -8   25.40    1.50
   8  -3   8   46.40    2.90
   8  -3   8   47.90    2.50
   9  -2   8   95.69    4.60
   9  -2   8   94.99    5.00
  10  -1   8   11.10    1.30
  10  -1   8   13.30    1.30
  11   0   8    0.20    1.00
  11   0   8   -0.30    0.60
  11   0   8    0.20    0.90
   9  -3   8   16.20    1.60
   9  -3   8   17.20    1.30
  10  -2   8  170.18    8.10
  10  -2   8  174.88    7.90
  11  -1   8   18.10    1.70
  11  -1   8   17.80    1.20
  12  -1  -9  126.19    5.60
  12  -1  -9  121.39    5.60
  11  -2  -9   17.20    1.00
  11  -2  -9   19.30    1.20
  10  -3  -9  276.17   12.50
  10  -3  -9  284.37   12.50
  12   0  -9    1.80    0.50
  12   0  -9    0.60    0.50
  12   0  -9    1.50    0.50
  11  -1  -9    4.80    0.60
  11  -1  -9    3.40    0.70
  10  -2  -9   73.89    3.50
  10  -2  -9   72.49    3.50
  10  -2  -9   69.59    3.40
   9  -3  -9    0.80    0.60
   9  -3  -9    0.20    0.40
   9  -3  -9    0.70    0.50
  12   1  -9  141.99    6.30
  12   1  -9  140.39    6.20
  12   1  -9  130.89    6.20
  11   0  -9 1003.50   44.90
  11   0  -9 1017.90   44.90
  11   0  -9 1018.40   44.80
  10  -1  -9   24.70    1.80
  10  -1  -9   28.10    1.70
   9  -2  -9  203.08    8.90
   9  -2  -9  191.78    8.90
   9  -2  -9  190.78    8.80
   8  -3  -9  187.58    8.50
   8  -3  -9  189.28    8.60
   8  -3  -9  188.68    8.70
   7  -4  -9   17.20    1.20
   7  -4  -9   14.70    1.30
  11   1  -9    5.20    0.70
  11   1  -9    5.80    0.90
  11   1  -9    5.30    0.70
  10   0  -9   -0.20    0.70
  10   0  -9    0.70    0.70
  10   0  -9    0.40    0.80
   9  -1  -9   51.69    2.70
   9  -1  -9   52.19    2.90
   8  -2  -9    2.60    0.70
   8  -2  -9    1.60    0.80
   8  -2  -9    1.00    0.70
   7  -3  -9  182.78    8.50
   7  -3  -9  181.48    8.40
   7  -3  -9  186.88    8.40
  -6   4   9   17.40    1.20
   6  -4  -9   16.00    1.30
   6  -4  -9   16.70    1.50
  11   2  -9   22.30    1.40
  11   2  -9   22.00    1.30
  11   2  -9   21.10    1.30
  10   1  -9   26.90    1.70
  10   1  -9   25.30    1.80
  10   1  -9   25.70    2.00
   9   0  -9  295.17   13.40
   9   0  -9  298.27   13.50
   9   0  -9  300.97   13.60
   8  -1  -9   12.50    1.20
   8  -1  -9   14.20    1.30
   7  -2  -9   64.09    3.10
   7  -2  -9   60.99    3.10
   7  -2  -9   58.79    3.30
   6  -3  -9   77.79    4.10
   6  -3  -9   63.49    3.90
   6  -3  -9   74.59    4.40
  -5   4   9   62.69    3.10
   5  -4  -9   56.89    3.40
   5  -4  -9   58.39    2.80
   5  -4  -9   63.69    3.10
  10   2  -9   83.49    4.00
  10   2  -9   85.59    4.20
  10   2  -9   87.19    4.10
   9   1  -9   57.19    3.00
   9   1  -9   53.39    2.90
   9   1  -9   57.29    3.20
   8   0  -9   -0.30    0.80
   8   0  -9    0.80    0.70
   8   0  -9   -0.50    0.60
   8   0  -9    0.00    0.60
   7  -1  -9   59.29    3.70
   7  -1  -9   62.29    4.60
   6  -2  -9    9.70    1.40
   6  -2  -9   11.70    2.10
  -5   3   9  204.48    9.10
   5  -3  -9  173.48    9.10
   5  -3  -9  210.38    9.10
   5  -3  -9  196.18    9.00
   5  -3  -9  198.48    8.90
  -4   4   9   23.60    1.70
   4  -4  -9   22.20    1.60
   4  -4  -9   19.40    1.50
   4  -4  -9   21.00    1.90
  10   3  -9  307.47   13.60
  10   3  -9  289.97   13.60
  10   3  -9  320.77   13.70
   9   2  -9  231.58   10.30
   9   2  -9  227.18   10.30
   9   2  -9  227.58   10.50
   8   1  -9   13.10    1.40
   8   1  -9   12.50    1.10
   8   1  -9   14.90    1.30
   7   0  -9   48.00    2.90
   7   0  -9   50.69    3.50
   7   0  -9   57.19    3.60
   6  -1  -9  347.77   17.00
   6  -1  -9  341.27   16.10
   6  -1  -9  372.36   16.50
   5  -2  -9  146.29    7.40
   5  -2  -9  155.68    8.40
  -4   3   9   48.00    2.60
   4  -3  -9   47.90    2.70
   4  -3  -9   40.50    2.70
  -3   4   9  265.17   11.70
   3  -4  -9  243.28   11.50
   3  -4  -9  257.57   11.60
   3  -4  -9  251.87   11.50
   2  -5  -9  131.49    5.90
   2  -5  -9  128.59    5.80
  -9  -3   9    0.30    0.50
   9   3  -9    0.30    0.50
   9   3  -9    0.80    0.60
   9   3  -9    0.70    0.60
  -8  -2   9    1.30    0.70
   8   2  -9    1.50    0.90
   8   2  -9    2.00    0.80
   8   2  -9    2.70    0.80
   8   2  -9    2.80    0.70
   7   1  -9   45.90    4.80
   7   1  -9   57.99    3.30
   6   0  -9   -1.00    0.90
   6   0  -9   -1.30    0.80
   6   0  -9    0.30    0.50
   6   0  -9   -0.60    1.40
   5  -1  -9   76.49    5.00
   5  -1  -9   72.09    4.00
   5  -1  -9   67.79    3.80
   4  -2  -9  237.48   11.60
   4  -2  -9  261.57   12.30
   3  -3  -9   72.59    3.90
   3  -3  -9   77.89    3.90
   3  -3  -9   73.59    3.80
   3  -3  -9   86.29    5.30
  -2   4   9   43.80    2.70
   2  -4  -9   39.70    2.50
   2  -4  -9   44.50    2.60
   2  -4  -9   45.30    2.50
  -1   5   9    2.80    0.60
   1  -5  -9    2.00    0.40
   1  -5  -9    1.40    0.50
  -8  -3   9  219.38   10.10
   8   3  -9  212.48    9.80
   8   3  -9  223.08    9.80
   8   3  -9  206.28    9.70
   8   3  -9  223.18    9.80
  -7  -2   9   69.59    3.50
   7   2  -9   69.89    3.70
   7   2  -9   67.89    3.40
   7   2  -9   71.59    3.50
   6   1  -9  357.06   17.00
   6   1  -9  364.26   16.50
   5   0  -9  325.27   15.80
   5   0  -9  328.97   15.30
   5   0  -9  342.27   15.70
   5   0  -9  346.97   15.30
   4  -1  -9  359.06   17.30
   4  -1  -9  387.96   17.60
   4  -1  -9  405.26   17.90
   3  -2  -9  723.63   31.50
   3  -2  -9  661.73   31.10
   2  -3  -9   98.39    6.50
   2  -3  -9   97.39    5.20
  -1   4   9   60.39    3.20
   1  -4  -9   54.69    3.20
   0   5   9  126.59    5.90
   0  -5  -9  129.49    5.90
  -7  -3   9  220.18    9.70
   7   3  -9  203.48    9.70
   7   3  -9  212.58    9.60
   7   3  -9  211.98    9.60
   6   2  -9   13.50    1.80
   6   2  -9   14.20    1.60
   5   1  -9   78.49    3.90
   5   1  -9   66.69    4.20
   5   1  -9   76.09    4.30
   4   0  -9    0.00    0.40
   4   0  -9   -0.60    0.60
   4   0  -9    0.60    0.70
   4   0  -9    0.10    1.00
   3  -1  -9  979.00   43.70
   3  -1  -9  989.70   44.00
   2  -2  -9  145.29    6.90
   2  -2  -9  143.19    7.40
   1  -3  -9   42.50    3.40
   1  -3  -9   45.20    3.10
   0   4   9   45.50    2.60
   0  -4  -9   40.60    2.70
   1   5   9   55.39    2.60
  -1  -5  -9   50.29    2.70
  -7  -4   9   17.40    1.10
   7   4  -9   15.00    1.10
   7   4  -9   15.40    1.00
   7   4  -9   15.70    1.20
  -6  -3   9   79.69    4.30
   6   3  -9   77.09    4.10
   6   3  -9   79.69    4.00
   5   2  -9  169.88    8.00
   5   2  -9  156.38    8.30
   4   1  -9  420.76   18.70
   4   1  -9  389.56   18.30
   3   0  -9 1478.45   66.29
   3   0  -9 1448.56   66.69
   3   0  -9 1687.43   66.99
   3   0  -9 1380.16   66.29
   2  -1  -9   27.50    1.80
   2  -1  -9   22.60    1.80
   2  -1  -9   26.10    2.40
   1  -2  -9 1271.67   61.29
   1  -2  -9 1458.35   61.39
   1  -2  -9 1416.16   61.59
   0  -3  -9  153.28    8.30
   1   4   9  508.05   22.30
   1   4   9  499.75   22.30
  -1  -4  -9  478.15   22.30
  -6  -4   9   19.50    1.40
   6   4  -9   17.50    1.40
   6   4  -9   19.50    1.40
  -5  -3   9  222.18   10.10
   5   3  -9  215.28   10.00
   5   3  -9  218.68   10.00
   5   3  -9  222.38    9.90
   4   2  -9  256.07   12.00
   3   1  -9 1029.50   44.20
   3   1  -9 1028.80   43.90
   3   1  -9  899.41   43.80
   2   0  -9   -0.40    0.80
   2   0  -9   -0.50    0.50
   2   0  -9    0.00    0.50
   2   0  -9    0.90    0.40
   1  -1  -9   21.20    2.00
   1  -1  -9   25.30    1.60
   0  -2  -9   92.09    5.00
   0  -2  -9  100.49    4.80
  -1  -3  -9    1.00    0.90
   2   4   9    3.10    0.90
   2   4   9    3.60    0.80
  -2  -4  -9    2.10    0.90
  -2  -4  -9    2.30    0.80
  -5  -4   9   63.29    3.20
   5   4  -9   60.29    3.00
   5   4  -9   61.49    3.20
  -4  -3   9   48.20    2.70
   4   3  -9   48.30    2.50
   4   3  -9   51.39    2.70
   3   2  -9  635.84   29.30
   3   2  -9  654.13   29.00
  -2  -1   9   21.70    1.40
   2   1  -9   23.20    2.60
   2   1  -9   25.00    1.80
   1   0  -9   24.90    1.50
   1   0  -9   21.50    1.60
   0  -1  -9   70.99    3.40
   0  -1  -9   64.69    3.60
  -1  -2  -9   19.60    1.80
   2   3   9   94.29    6.30
  -2  -3  -9  113.79    5.60
   3   4   9  186.48    8.30
  -3  -4  -9  165.48    8.10
  -3  -4  -9  174.08    8.20
  -4  -4   9   22.90    1.60
   4   4  -9   22.30    1.40
   4   4  -9   22.60    1.70
  -3  -3   9   89.49    4.40
   3   3  -9   88.79    4.40
   2   2  -9  130.29    6.70
   2   2  -9  138.09    6.50
  -1  -1   9   24.00    1.50
   1   1  -9   23.00    1.70
   0   0   9   -0.10    0.40
   0   0  -9   -0.20    0.30
   1   1   9 1515.95   65.99
  -1  -1  -9 1460.85   65.79
   2   2   9  132.39    6.40
  -2  -2  -9  113.99    5.90
   3   3   9    9.70    1.10
   3   3   9   11.80    1.10
  -3  -3  -9   12.00    1.30
  -3  -3  -9    9.90    1.20
   4   4   9    2.40    0.80
  -4  -4  -9    2.60    0.70
  -4  -4  -9    2.20    0.80
  -3  -4   9  266.97   11.90
  -3  -4   9  265.77   11.80
   3   4  -9  268.07   11.90
   3   4  -9  238.98   12.20
   2   3  -9   87.09    4.70
   1   2  -9 1271.67   56.89
   1   2  -9 1288.17   57.19
   0  -1   9   65.19    3.20
   0  -1   9   72.59    3.40
   0   1  -9   65.09    3.60
   1   0   9   90.09    4.30
   2   1   9 1070.59   45.00
  -2  -1  -9  949.80   44.70
   3   2   9 1265.47   57.29
  -3  -2  -9 1295.17   56.89
   4   3   9   12.50    1.20
  -4  -3  -9    9.80    1.20
   5   4   9   65.09    3.20
  -5  -4  -9   56.39    3.20
  -2  -4   9   44.80    2.50
  -2  -4   9   50.19    2.70
   2   4  -9   49.00    2.70
   2   4  -9   42.90    2.90
  -1  -3   9   48.40    4.80
   0  -2   9   97.79    4.50
   0   2  -9   87.99    4.70
   1  -1   9 1353.66   61.39
   1  -1   9 1416.36   61.39
   2   0   9   -0.20    0.60
   2   0   9   -0.30    0.50
   3   1   9  172.28    7.90
   3   1   9  178.18    8.10
  -3  -1  -9  152.98    7.60
   4   2   9   93.59    4.90
   4   2   9   99.69    5.50
   5   3   9   22.30    1.70
   5   3   9   21.30    2.30
  -5  -3  -9   20.00    1.80
   6   4   9    6.80    0.80
  -6  -4  -9    4.30    0.80
  -2  -5   9  116.09    5.70
   2   5  -9  128.29    5.60
  -1  -4   9   61.29    3.20
  -1  -4   9   61.89    3.40
   1   4  -9   59.19    3.40
   1   4  -9   67.79    3.50
   0  -3   9  196.38   11.50
   0   3  -9  210.38   10.90
  -1   2  -9   13.70    1.30
   2  -1   9 1058.19   45.90
   2  -1   9 1014.60   46.30
   2  -1   9 1026.10   46.00
   3   0   9 1367.56   61.19
   3   0   9 1388.86   61.19
   4   1   9   69.59    3.50
   4   1   9   65.99    3.90
   4   1   9   69.09    3.70
   5   2   9 1458.55   66.59
   5   2   9 1519.45   66.39
   6   3   9  150.28    7.00
   6   3   9  154.98    7.50
  -6  -3  -9  141.69    7.10
   7   4   9   87.19    3.90
  -7  -4  -9   81.09    4.00
  -1  -5   9    1.30    0.60
   1   5  -9    1.60    0.50
   1   5  -9    1.90    0.60
   0  -4   9   50.19    3.00
   0   4  -9   45.90    2.90
   0   4  -9   57.29    3.10
   1  -3   9    2.70    1.50
   2  -2   9  121.69    6.70
   2  -2   9  121.09    6.00
   2  -2   9  121.49    5.90
  -2   2  -9  120.99    6.00
   3  -1   9  163.48    8.50
   3  -1   9  179.78    8.30
   3  -1   9  192.68    9.30
   4   0   9    0.60    0.70
   4   0   9   -0.40    0.70
   5   1   9   11.90    1.40
   5   1   9   11.50    1.40
   5   1   9   13.10    1.30
   6   2   9  448.46   20.30
   6   2   9  453.15   20.90
   6   2   9  450.35   21.20
  -6  -2  -9  457.35   20.90
   7   3   9  117.99    6.20
   7   3   9  114.39    5.40
  -7  -3  -9  111.39    5.60
   0  -5   9  135.69    6.20
   0  -5   9  145.09    6.10
   0   5  -9  117.39    6.10
   1  -4   9  620.14   29.60
  -1   4  -9  707.43   29.60
   2  -3   9  167.68    7.70
  -2   3  -9  164.58    7.80
   3  -2   9 1244.38   55.09
   3  -2   9 1235.88   55.69
   3  -2   9 1227.08   55.19
   4  -1   9   66.79    3.70
   4  -1   9   68.79    3.80
   5   0   9   77.29    4.20
   5   0   9   77.39    4.10
   6   1   9  524.55   23.90
   6   1   9  526.95   23.80
   6   1   9  528.05   24.10
   7   2   9  360.46   16.30
   7   2   9  371.56   16.80
   7   2   9  363.26   16.30
  -7  -2  -9  351.76   16.40
   8   3   9  264.67   11.50
   8   3   9  245.78   11.50
  -8  -3  -9  257.77   11.60
   1  -5   9   62.19    3.00
   1  -5   9   64.89    3.20
  -1   5  -9   57.19    3.20
   2  -4   9    4.40    1.00
  -2   4  -9    2.80    1.20
   3  -3   9   15.40    1.60
  -3   3  -9   12.80    1.30
   4  -2   9   94.39    5.10
   4  -2   9   90.39    4.90
   5  -1   9   13.70    1.50
   5  -1   9   11.20    1.50
   6   0   9    0.20    0.90
   6   0   9   -0.10    0.80
   7   1   9   12.30    1.10
   7   1   9   11.80    1.60
   7   1   9   13.80    1.60
   7   1   9   14.10    1.20
   7   1   9   13.70    1.40
  -7  -1  -9    9.80    1.10
   8   2   9    0.30    0.50
   8   2   9    0.20    1.10
   8   2   9    0.40    0.70
  -8  -2  -9    0.80    0.80
  -9  -3  -9   56.49    2.80
   3  -4   9  219.08   10.50
   3  -4   9  220.88   10.20
  -3   4  -9  227.78   10.30
   4  -3   9   12.60    1.60
   4  -3   9   11.60    1.10
   4  -3   9    7.00    1.60
  -4   3  -9   12.50    1.30
   5  -2   9 1234.58   59.09
   5  -2   9 1410.96   59.49
   6  -1   9  520.85   24.30
   6  -1   9  538.85   24.20
   7   0   9   28.60    2.60
   7   0   9   29.70    2.40
   8   1   9  101.29    5.50
   8   1   9  107.59    5.10
   8   1   9  100.89    5.00
   8   1   9  107.49    4.90
  -8  -1  -9   99.89    5.10
   9   2   9   38.30    2.30
   9   2   9   39.10    2.90
   9   2   9   37.70    1.90
  -9  -2  -9   40.30    2.20
   4  -4   9    3.80    0.80
   4  -4   9    2.70    1.20
  -4   4  -9    3.20    1.20
   5  -3   9   20.60    2.60
   5  -3   9   23.00    1.70
   5  -3   9   23.00    1.70
  -5   3  -9   22.70    2.20
   6  -2   9  485.05   22.40
   6  -2   9  580.84   22.80
   6  -2   9  511.25   23.50
  -6   2  -9  440.56   22.60
   7  -1   9   13.00    1.40
   7  -1   9   13.90    1.50
   7  -1   9   13.80    1.20
   8   0   9    0.20    0.80
   8   0   9    0.90    0.80
   8   0   9   -0.30    1.10
   9   1   9  180.98    8.60
   9   1   9  182.38    8.30
   9   1   9  176.08    8.10
  -9  -1  -9  166.88    8.20
  10   2   9   43.00    2.20
  10   2   9   43.30    2.80
 -10  -2  -9   40.30    2.20
   5  -4   9   64.29    3.60
   5  -4   9   62.69    3.00
  -5   4  -9   62.59    3.60
   6  -3   9  154.08    7.10
   6  -3   9  158.88    7.10
   6  -3   9  159.78    7.60
  -6   3  -9  145.69    7.40
   7  -2   9  383.76   17.50
   7  -2   9  384.56   17.20
   8  -1   9  111.59    5.40
   8  -1   9  114.69    5.50
   8  -1   9  111.59    5.80
   9   0   9  624.24   28.70
   9   0   9  660.83   28.80
   9   0   9  649.64   29.10
  10   1   9   20.60    2.40
  10   1   9   24.40    2.20
   6  -4   9    6.90    1.40
  -6   4  -9    5.50    0.90
   7  -3   9  117.19    5.70
  -7   3  -9  111.49    5.40
   8  -2   9    1.00    1.10
   9  -1   9  184.48    8.80
   9  -1   9  184.08    8.50
   9  -1   9  182.78    8.40
  10   0   9   -0.20    0.70
  10   0   9   -0.40    1.20
  11   1   9   12.10    1.50
  11   1   9   12.80    1.20
   7  -4   9   87.49    4.10
  -7   4  -9   82.09    3.90
   8  -3   9  278.47   12.50
   8  -3   9  278.27   12.70
   9  -2   9   41.00    2.30
   9  -2   9   38.40    2.70
  10  -1   9   25.00    2.20
  10  -1   9   28.80    2.70
  10  -1   9   27.10    1.70
  11   0   9  664.23   29.80
  11   0   9  670.23   29.50
  11   0   9  661.03   29.60
   9  -3   9   63.99    3.00
   9  -3   9   60.59    3.20
  10  -2   9   45.00    2.40
  10  -2   9   46.20    2.70
  11  -1   9   12.90    1.10
  11  -1   9   14.40    1.50
  11  -1   9   13.90    1.20
  12  -1 -10   72.99    3.40
  12  -1 -10   73.59    3.30
  11  -2 -10    3.80    0.40
  11  -2 -10    3.50    0.50
  12   0 -10  149.29    6.50
  12   0 -10  143.19    6.40
  12   0 -10  136.19    6.50
  11  -1 -10  154.88    7.10
  11  -1 -10  157.48    7.10
  10  -2 -10  189.78    8.70
  10  -2 -10  195.78    8.60
  10  -2 -10  187.38    8.60
   9  -3 -10  161.88    7.40
   9  -3 -10  156.88    7.30
   9  -3 -10  164.98    7.30
  12   1 -10   81.19    3.80
  12   1 -10   84.89    3.90
  12   1 -10   83.19    3.80
  11   0 -10    0.60    0.60
  11   0 -10    0.80    0.70
  11   0 -10    0.50    0.70
  10  -1 -10    5.70    0.80
  10  -1 -10    6.00    0.90
   9  -2 -10   20.40    1.60
   8  -3 -10   34.20    2.00
   8  -3 -10   35.10    2.20
   8  -3 -10   34.60    1.90
   7  -4 -10    0.00    0.50
   7  -4 -10    0.50    0.50
  11   1 -10  176.48    8.00
  11   1 -10  178.68    8.10
  11   1 -10  177.38    8.20
  10   0 -10   13.20    1.20
  10   0 -10   11.70    1.00
  10   0 -10   14.20    1.20
   9  -1 -10  157.68    7.20
   9  -1 -10  156.28    7.40
   8  -2 -10  337.87   16.00
   8  -2 -10  372.96   16.00
   8  -2 -10  362.06   16.10
   7  -3 -10  207.28    9.40
   7  -3 -10  207.08    9.50
   7  -3 -10  207.98    9.40
  -6   4  10   67.99    3.40
   6  -4 -10   77.49    3.60
   6  -4 -10   69.49    3.40
  11   2 -10    2.70    0.50
  11   2 -10    4.30    0.60
  11   2 -10    3.60    0.50
  10   1 -10    6.60    0.90
  10   1 -10    6.60    1.00
  10   1 -10    6.00    0.90
   9   0 -10    1.30    0.80
   9   0 -10   -0.40    0.80
   9   0 -10    0.00    0.70
   8  -1 -10  424.96   18.80
   8  -1 -10  412.76   18.70
   7  -2 -10  353.36   15.60
   7  -2 -10  355.96   15.70
   7  -2 -10  333.37   15.60
   6  -3 -10   43.70    2.60
   6  -3 -10   38.10    2.30
   6  -3 -10   38.50    2.30
  -5   4  10   -0.60    0.60
   5  -4 -10    1.30    0.80
   5  -4 -10    0.00    0.60
  10   2 -10  222.68    9.90
  10   2 -10  218.18   10.10
  10   2 -10  222.68   10.00
   9   1 -10  169.78    8.10
   9   1 -10  171.68    8.00
   9   1 -10  177.48    8.50
   8   0 -10   15.20    1.40
   8   0 -10   14.50    1.50
   8   0 -10   15.80    1.50
   7  -1 -10 1500.25   65.99
   7  -1 -10 1408.16   66.69
   7  -1 -10 1542.65   66.39
   6  -2 -10   14.50    1.50
   6  -2 -10   14.50    1.10
   6  -2 -10   14.90    1.30
  -5   3  10  589.14   25.80
   5  -3 -10  574.14   25.80
   5  -3 -10  594.94   25.70
   5  -3 -10  554.34   25.70
   5  -3 -10  564.54   25.60
  -4   4  10   15.50    1.50
   4  -4 -10   11.40    1.20
   4  -4 -10   12.90    1.70
   9   2 -10   18.40    1.60
   9   2 -10   23.10    1.50
   9   2 -10   21.80    1.80
   8   1 -10  436.86   19.60
   8   1 -10  441.26   19.50
   8   1 -10  435.06   19.70
   7   0 -10   -0.20    0.60
   7   0 -10    1.10    1.10
   7   0 -10   -0.40    1.10
   6  -1 -10  276.47   13.90
   6  -1 -10  286.37   13.40
   6  -1 -10  279.77   13.00
   5  -2 -10   68.99    5.30
   5  -2 -10   70.99    4.10
  -4   3  10   97.19    4.70
   4  -3 -10   91.79    4.50
   4  -3 -10   88.09    4.60
   4  -3 -10   92.99    4.50
  -3   4  10   55.09    3.00
   3  -4 -10   47.20    2.70
   3  -4 -10   52.79    2.90
   3  -4 -10   55.59    2.90
  -9  -3  10  182.68    8.30
   9   3 -10  184.78    8.20
   9   3 -10  179.48    8.30
   9   3 -10  182.88    8.20
  -8  -2  10  391.76   18.40
   8   2 -10  423.16   18.40
   8   2 -10  438.66   18.70
   8   2 -10  406.26   18.40
   8   2 -10  402.26   18.30
   7   1 -10 1613.54   72.59
   7   1 -10 1618.94   71.89
   6   0 -10  623.64   29.00
   6   0 -10  665.73   29.70
   6   0 -10  657.73   29.20
   5  -1 -10  544.45   24.50
   5  -1 -10  546.35   25.70
   5  -1 -10  529.65   24.60
   4  -2 -10  102.79    5.50
   4  -2 -10  116.59    6.50
  -3   3  10  125.29    5.70
   3  -3 -10  113.99    5.70
   3  -3 -10  114.89    5.60
   3  -3 -10  108.39    5.50
  -2   4  10  230.88   10.40
   2  -4 -10  218.48   10.30
   2  -4 -10  221.68   10.20
  -8  -3  10   39.10    2.10
   8   3 -10   40.30    2.30
   8   3 -10   38.70    2.10
   8   3 -10   36.30    1.90
   8   3 -10   38.40    2.10
  -7  -2  10  380.06   17.20
   7   2 -10  390.76   17.40
   7   2 -10  392.56   17.20
   7   2 -10  388.36   17.20
   7   2 -10  368.86   17.20
   6   1 -10  294.57   14.30
   6   1 -10  297.17   13.70
   5   0 -10    0.40    0.80
   5   0 -10    0.20    0.80
   5   0 -10    0.20    0.40
   5   0 -10    0.10    1.10
   4  -1 -10   93.89    4.80
   4  -1 -10   98.19    5.70
   4  -1 -10  100.69    5.10
   3  -2 -10   49.60    4.20
   3  -2 -10   48.30    3.00
  -2   3  10  118.89    5.50
   2  -3 -10  113.19    6.30
   2  -3 -10  107.69    5.20
   2  -3 -10  104.39    5.30
   2  -3 -10  109.79    5.40
  -1   4  10   18.40    1.70
   1  -4 -10   14.80    1.40
   0   5  10    0.80    0.50
  -7  -3  10  233.98   10.40
   7   3 -10  232.28   10.30
   7   3 -10  229.58   10.30
   7   3 -10  215.88   10.40
  -6  -2  10   12.40    1.40
   6   2 -10   16.70    1.50
   6   2 -10   14.60    1.30
   6   2 -10   13.20    1.30
   5   1 -10  544.35   24.80
   5   1 -10  546.55   23.90
   5   1 -10  497.05   24.40
   4   0 -10 2405.76  103.89
   4   0 -10 2351.86  103.39
   4   0 -10 2335.87  103.79
   4   0 -10 2260.37  103.39
   3  -1 -10   62.29    3.40
   3  -1 -10   66.79    4.20
   3  -1 -10   68.49    3.60
   2  -2 -10  763.32   35.30
   2  -2 -10  803.52   35.00
  -1   3  10   87.69    5.30
   1  -3 -10   80.39    4.60
   1  -3 -10   86.19    4.50
   1  -3 -10   88.29    4.70
   0   4  10   56.59    3.10
   0  -4 -10   49.90    3.00
  -7  -4  10   -0.10    0.50
   7   4 -10    0.00    0.40
   7   4 -10    0.50    0.50
   7   4 -10    0.70    0.40
  -6  -3  10   45.70    2.50
   6   3 -10   47.00    2.60
   6   3 -10   46.00    2.40
   6   3 -10   42.60    2.50
   5   2 -10   69.09    4.30
   5   2 -10   72.69    4.00
   4   1 -10  101.69    5.10
   4   1 -10  103.19    5.50
   4   1 -10  101.59    5.30
   3   0 -10    0.60    0.40
   3   0 -10    0.70    0.70
   3   0 -10    0.20    0.60
   2  -1 -10    1.40    0.60
   2  -1 -10    1.50    0.60
   1  -2 -10   84.49    4.30
   1  -2 -10   90.19    4.40
   1  -2 -10   80.69    4.70
   0   3  10   38.30    3.20
   0  -3 -10   35.70    2.70
   1   4  10    6.30    1.00
   1   4  10    6.90    1.00
  -1  -4 -10    8.30    1.10
  -6  -4  10   79.69    3.70
   6   4 -10   77.79    3.70
   6   4 -10   73.89    3.60
  -5  -3  10  649.34   28.10
   5   3 -10  624.54   28.10
   5   3 -10  621.74   28.00
   5   3 -10  625.14   28.10
   4   2 -10  113.79    5.80
   3   1 -10   72.29    3.80
   3   1 -10   69.09    4.00
   3   1 -10   67.49    3.60
   2   0 -10 1583.04   73.89
   2   0 -10 1757.52   73.89
   1  -1 -10 1123.39   49.90
   1  -1 -10 1099.99   50.19
   1  -1 -10 1157.18   50.19
   0  -2 -10  754.82   36.60
   0  -2 -10  870.01   36.30
   1   3  10   93.19    4.90
  -1  -3 -10   96.09    5.00
  -1  -3 -10  106.99    5.50
   2   4  10  113.99    5.40
   2   4  10  117.59    5.30
  -2  -4 -10  106.29    5.40
  -2  -4 -10   95.89    5.40
  -5  -4  10   -0.80    0.60
   5   4 -10    0.40    0.70
   5   4 -10    0.00    0.60
  -4  -3  10   98.69    4.80
   4   3 -10  100.99    4.90
   4   3 -10  100.69    4.70
   3   2 -10   51.39    2.90
   3   2 -10   46.00    3.10
  -2  -1  10    0.90    0.50
   2   1 -10    0.30    0.50
   2   1 -10    1.10    0.70
   1   0 -10   -0.40    0.40
   1   0 -10   -0.30    0.60
   0   1  10  190.38    8.90
   0  -1 -10  192.68    8.70
  -1  -2 -10 1150.58   51.19
   2   3  10   92.29    4.60
   2   3  10   97.29    4.70
  -2  -3 -10   89.59    4.70
  -2  -3 -10   86.09    4.60
   3   4  10   16.70    1.60
   3   4  10   16.90    1.40
  -3  -4 -10   13.90    1.50
  -3  -4 -10   18.80    1.90
  -4  -4  10   12.50    1.50
  -3  -3  10  122.49    5.90
   3   3 -10  103.09    6.50
   3   3 -10  125.39    5.70
   2   2 -10  761.92   35.70
   2   2 -10  818.12   35.50
  -1  -1  10 1022.90   47.60
   1   1 -10 1125.79   48.00
   0   0  10  501.55   22.20
   0   0 -10  496.35   22.10
  -1  -1 -10 2338.07  103.29
   2   2  10   20.90    2.60
  -2  -2 -10   26.90    2.00
   3   3  10   20.50    1.80
   3   3  10   17.20    1.60
  -3  -3 -10   15.90    1.50
  -3  -3 -10   15.60    1.70
   4   4  10   70.39    3.30
  -4  -4 -10   58.49    3.20
  -4  -4 -10   59.39    3.20
  -3  -4  10   56.29    2.90
  -3  -4  10   52.09    3.00
   3   4 -10   55.99    3.00
  -2  -3  10  117.49    5.60
   2   3 -10  119.79    5.70
   1   2 -10   83.69    4.50
   1   2 -10   84.19    4.30
   0  -1  10  177.08    8.40
   0   1 -10  187.08    8.70
   1   0  10    0.30    0.50
   1   0  10    0.90    0.70
   2   1  10   37.80    2.50
  -2  -1 -10   33.40    1.90
   3   2  10  225.68   10.70
   3   2  10  221.68   10.40
  -3  -2 -10  215.88   10.30
   4   3  10  227.98    9.90
  -4  -3 -10  195.88    9.90
   5   4  10   56.49    2.80
  -5  -4 -10   51.19    2.80
  -2  -4  10  240.78   11.00
  -2  -4  10  242.68   10.90
   2   4 -10  244.28   11.00
   2   4 -10  232.18   11.00
   1   3 -10   90.79    5.00
   0  -2  10  773.92   34.50
   0   2 -10  773.82   34.90
   1  -1  10 1974.90   90.69
   1  -1  10 2129.19   91.29
   2   0  10 2171.68   96.09
   3   1  10   56.29    3.50
   3   1  10   57.89    3.30
  -3  -1 -10   66.09    3.10
   4   2  10  238.28   11.40
   4   2  10  247.88   11.80
   5   3  10  181.68    8.00
  -5  -3 -10  154.18    8.00
   6   4  10   85.39    4.00
  -6  -4 -10   82.09    4.00
  -1  -4  10   14.40    1.30
  -1  -4  10   19.10    1.40
   1   4 -10   17.30    1.60
   1   4 -10   17.10    1.70
   0  -3  10   34.00    4.20
   0   3 -10   40.40    2.80
   1  -2  10 1146.69   50.39
  -1   2 -10 1118.49   50.59
   2  -1  10   38.00    2.60
   2  -1  10   35.90    2.20
   2  -1  10   38.10    2.30
   4   1  10   50.09    3.20
   4   1  10   52.09    3.00
   5   2  10    3.40    1.60
   5   2  10    3.40    0.80
  -5  -2 -10    1.50    0.90
   6   3  10    0.40    0.70
  -6  -3 -10   -0.10    0.80
   1   5 -10   62.69    3.00
   0  -4  10   66.69    3.50
   0   4 -10   61.29    3.40
   1  -3  10  136.29    6.70
  -1   3 -10  150.78    6.80
   2  -2  10   23.50    1.90
   2  -2  10   22.70    1.90
   2  -2  10   24.10    2.80
  -2   2 -10   25.80    1.90
   3  -1  10   57.69    3.20
   3  -1  10   52.59    3.30
   3  -1  10   56.99    3.20
   4   0  10  477.85   22.10
   4   0  10  498.85   22.10
   5   1  10   53.79    3.40
   5   1  10   53.89    3.20
   6   2  10    9.70    1.10
   6   2  10   10.70    1.10
   6   2  10   10.30    1.50
  -6  -2 -10   12.30    1.30
   7   3  10  191.98    8.40
  -7  -3 -10  174.78    8.50
   0  -5  10    1.70    0.60
   0   5 -10    1.30    0.60
   1  -4  10   11.00    1.30
  -1   4 -10   13.80    1.50
   2  -3  10  145.59    6.80
  -2   3 -10  142.79    6.90
   3  -2  10  232.98   11.00
   3  -2  10  230.28   11.70
   3  -2  10  232.88   10.90
   4  -1  10   50.29    3.10
   4  -1  10   50.09    3.10
   5   0  10    0.30    0.90
   5   0  10   -0.40    0.80
   6   1  10  288.47   13.50
   6   1  10  278.57   13.30
   7   2  10    8.00    0.90
   7   2  10    8.90    1.70
  -7  -2 -10    9.30    1.30
   8   3  10   -0.30    0.40
  -8  -3 -10    0.30    0.60
   2  -4  10  186.78    8.00
   2  -4  10  146.79    8.20
  -2   4 -10  184.88    8.20
   3  -3  10   21.00    2.30
   3  -3  10   23.10    1.90
  -3   3 -10   22.00    2.10
   4  -2  10  235.98   11.20
   4  -2  10  244.48   11.40
   4  -2  10  225.28   11.70
   5  -1  10   57.59    3.60
   5  -1  10   55.19    3.40
   6   0  10   43.90    3.00
   6   0  10   44.50    3.10
   7   1  10  142.29    6.80
   7   1  10  145.09    6.90
   7   1  10  149.19    7.30
   7   1  10  149.59    6.90
   8   2  10   65.99    3.90
   8   2  10   63.19    3.20
   8   2  10   66.39    3.40
  -8  -2 -10   63.89    3.40
  -9  -3 -10   61.69    3.00
   3  -4  10   18.00    1.70
   3  -4  10   22.00    2.30
  -3   4 -10   23.80    2.30
   4  -3  10  242.88   11.40
   4  -3  10  249.68   11.70
  -4   3 -10  259.77   11.60
   5  -2  10    3.90    1.10
   5  -2  10    3.60    1.20
   6  -1  10  274.47   12.60
   6  -1  10  253.67   13.90
   7   0  10   -0.80    0.70
   7   0  10    1.10    0.80
   7   0  10    0.50    0.40
   7   0  10    0.20    0.90
   8   1  10    6.80    1.00
   8   1  10   10.00    1.00
   8   1  10    7.10    1.10
   8   1  10    8.10    1.40
  -8  -1 -10    9.40    1.10
   9   2  10   48.60    2.60
   9   2  10   44.80    2.40
   9   2  10   46.90    3.00
  -9  -2 -10   48.30    2.60
   4  -4  10   77.39    4.20
   4  -4  10   77.39    3.80
  -4   4 -10   78.29    4.20
   5  -3  10  189.58    8.80
   5  -3  10  194.88    9.30
   5  -3  10  197.58    8.90
  -5   3 -10  190.28    9.10
   6  -2  10   11.40    1.10
   6  -2  10   11.80    1.10
   6  -2  10   16.50    1.60
  -6   2 -10   10.10    1.20
   7  -1  10  151.58    7.50
   7  -1  10  159.28    7.20
   7  -1  10  157.78    7.40
   7  -1  10  153.68    7.40
   8   0  10  394.06   18.60
   8   0  10  402.46   18.20
   8   0  10  424.36   18.40
   9   1  10  133.89    6.80
   9   1  10  138.99    6.40
   9   1  10  137.89    6.30
  -9  -1 -10  129.49    6.50
  10   2  10  142.89    6.40
  10   2  10  145.79    6.70
 -10  -2 -10  132.09    6.40
   5  -4  10   56.29    3.20
   5  -4  10   56.39    2.80
  -5   4 -10   51.59    3.20
   6  -3  10    0.70    0.50
   6  -3  10    0.80    1.10
   6  -3  10   -0.20    0.70
  -6   3 -10    0.60    1.10
   7  -2  10    7.50    1.40
   7  -2  10   10.70    1.00
   7  -2  10    7.60    1.00
   8  -1  10    8.90    1.10
   8  -1  10    8.40    1.10
   8  -1  10    8.60    1.40
   9   0  10   -0.40    0.80
   9   0  10    0.00    0.70
   9   0  10    1.00    1.10
  10   1  10   15.80    1.40
  10   1  10   17.90    1.90
 -10  -1 -10   12.60    1.10
   6  -4  10   79.29    4.00
  -6   4 -10   82.49    3.90
   7  -3  10  206.98    9.10
   7  -3  10  199.28    9.40
  -7   3 -10  195.08    9.10
   8  -2  10   74.39    4.10
   8  -2  10   73.29    3.70
   9  -1  10  139.09    6.60
   9  -1  10  144.39    6.90
   9  -1  10  140.49    6.60
  10   0  10  345.97   15.40
  10   0  10  333.07   15.60
  10   0  10  336.77   15.20
  11   1  10   14.50    1.20
  11   1  10   15.20    1.50
   8  -3  10   -0.60    0.70
   8  -3  10    0.70    0.80
  -8   3 -10   -0.20    0.50
   9  -2  10   51.99    3.10
   9  -2  10   53.69    2.80
  10  -1  10   16.70    1.80
  10  -1  10   17.30    1.40
  10  -1  10   15.80    1.30
  11   0  10   -0.40    0.50
  11   0  10   -0.20    0.50
  11   0  10    0.30    0.80
   9  -3  10   67.79    3.40
   9  -3  10   68.59    3.20
  10  -2  10  145.89    6.90
  10  -2  10  147.99    6.70
  11  -1  10   13.60    1.40
  11  -1  10   14.70    1.00
  11  -1  10   16.30    1.20
  11  -2 -11   19.40    1.20
  11  -2 -11   18.60    1.00
  12   0 -11    0.40    0.40
  12   0 -11   -0.10    0.30
  12   0 -11   -0.50    0.40
  11  -1 -11    8.80    0.90
  11  -1 -11   10.90    0.90
  10  -2 -11   79.69    3.70
  10  -2 -11   79.39    3.80
   9  -3 -11    2.90    0.50
   9  -3 -11    3.00    0.60
   9  -3 -11    3.30    0.50
  11   0 -11  414.66   18.70
  11   0 -11  422.76   18.80
  11   0 -11  424.76   18.80
  10  -1 -11    9.80    1.30
  10  -1 -11   10.20    1.50
   9  -2 -11   15.20    1.40
   9  -2 -11   10.10    1.20
   9  -2 -11    9.70    0.80
   8  -3 -11  194.78    8.80
   8  -3 -11  184.38    8.70
   8  -3 -11  203.08    8.80
   7  -4 -11    6.30    0.70
   7  -4 -11    7.10    0.60
  11   1 -11   11.40    0.90
  11   1 -11   11.60    1.00
  11   1 -11   12.00    1.20
  10   0 -11   -1.30    0.70
  10   0 -11   -0.20    0.60
  10   0 -11    0.30    0.80
   9  -1 -11   94.79    4.50
   9  -1 -11   94.49    4.60
   8  -2 -11   54.49    2.80
   8  -2 -11   47.10    2.60
   8  -2 -11   54.29    2.70
   7  -3 -11   46.40    2.60
   7  -3 -11   46.90    2.50
   7  -3 -11   49.90    2.70
  -6   4  11   23.90    1.50
   6  -4 -11   27.10    1.60
   6  -4 -11   26.30    1.50
  11   2 -11   21.90    1.30
  11   2 -11   20.10    1.20
  11   2 -11   23.00    1.30
  10   1 -11    9.90    1.40
  10   1 -11   11.60    1.50
  10   1 -11   12.80    1.10
   9   0 -11  450.95   19.90
   9   0 -11  431.16   20.10
   8  -1 -11   14.90    1.30
   8  -1 -11   15.60    1.30
   7  -2 -11   10.70    1.00
   7  -2 -11   11.30    1.00
   7  -2 -11   12.50    1.20
   6  -3 -11  188.98    8.50
   6  -3 -11  172.98    8.40
   6  -3 -11  192.78    8.60
  -5   4  11   29.80    1.90
   5  -4 -11   35.00    2.00
   5  -4 -11   30.60    1.80
  10   2 -11   88.79    4.40
  10   2 -11   91.39    4.30
  10   2 -11   93.29    4.30
   9   1 -11   99.39    4.80
   9   1 -11  101.99    4.70
   9   1 -11   97.39    5.00
   8   0 -11   -0.40    0.70
   8   0 -11    0.20    0.70
   8   0 -11   -0.10    0.80
   7  -1 -11   -0.70    0.90
   7  -1 -11   -0.90    0.70
   7  -1 -11    0.40    0.60
   6  -2 -11   19.20    1.70
   6  -2 -11   17.80    1.70
  -5   3  11   13.90    1.50
   5  -3 -11   13.80    1.20
   5  -3 -11   15.40    1.30
   5  -3 -11   15.70    1.40
   5  -3 -11   17.00    1.40
  -4   4  11   46.50    2.60
   4  -4 -11   45.80    2.40
   4  -4 -11   48.70    2.70
  -9  -2  11    9.60    1.00
   9   2 -11   10.60    1.10
   9   2 -11   10.30    1.00
   9   2 -11    9.80    0.90
   8   1 -11   15.40    1.50
   8   1 -11   17.80    1.50
   8   1 -11   17.50    1.40
   7   0 -11  486.55   22.40
   7   0 -11  468.15   21.80
   6  -1 -11  790.22   34.60
   6  -1 -11  796.52   35.10
   6  -1 -11  731.83   35.30
   5  -2 -11  112.59    6.90
   5  -2 -11  115.49    5.90
  -4   3  11  686.53   30.30
   4  -3 -11  668.93   30.00
   4  -3 -11  669.93   30.10
  -3   4  11  129.39    6.60
   3  -4 -11  115.89    6.00
   3  -4 -11  123.89    6.20
   3  -4 -11  126.69    5.90
  -9  -3  11    2.80    0.50
   9   3 -11    4.10    0.60
   9   3 -11    3.60    0.50
   9   3 -11    4.10    0.60
  -8  -2  11   59.39    3.00
   8   2 -11   61.59    3.10
   8   2 -11   57.39    2.80
   8   2 -11   57.29    3.00
   8   2 -11   62.19    3.30
   7   1 -11    1.20    0.80
   7   1 -11    0.40    0.70
   7   1 -11    0.20    0.60
   7   1 -11   -0.60    0.70
   6   0 -11    0.70    0.90
   6   0 -11   -0.20    0.50
   6   0 -11   -0.20    1.00
   5  -1 -11   93.19    4.80
   5  -1 -11   95.59    5.90
   5  -1 -11   93.89    5.10
   4  -2 -11   59.09    4.60
   4  -2 -11   57.89    3.50
  -3   3  11  471.55   19.90
   3  -3 -11  431.66   19.70
   3  -3 -11  427.96   19.60
   3  -3 -11  423.86   19.70
  -2   4  11  115.49    5.70
   2  -4 -11  118.69    5.40
   2  -4 -11  111.89    5.50
  -8  -3  11  216.58    9.80
   8   3 -11  217.28    9.70
   8   3 -11  219.18    9.70
   8   3 -11  208.38    9.80
   8   3 -11  221.68    9.80
  -7  -2  11   11.60    1.20
   7   2 -11   13.70    1.10
   7   2 -11   15.30    1.60
   7   2 -11   12.20    1.10
   7   2 -11   10.80    1.20
   6   1 -11  833.82   37.80
   6   1 -11  822.72   37.20
   5   0 -11  454.25   20.40
   5   0 -11  423.56   19.80
   5   0 -11  440.46   19.90
   4  -1 -11  185.68    8.50
   4  -1 -11  164.08    8.10
   4  -1 -11  172.08    8.90
   3  -2 -11  463.65   20.80
   3  -2 -11  427.36   20.20
  -2   3  11  358.16   16.10
   2  -3 -11  330.07   15.40
  -1   4  11  165.48    7.60
   1  -4 -11  152.08    7.50
  -7  -3  11   55.59    2.80
   7   3 -11   53.99    3.30
   7   3 -11   52.09    2.70
   7   3 -11   50.89    2.70
   7   3 -11   52.19    2.80
  -6  -2  11   22.30    1.50
   6   2 -11   23.90    1.60
   6   2 -11   23.00    2.00
   5   1 -11  103.29    5.40
   5   1 -11   94.89    5.10
   5   1 -11  104.99    5.70
   4   0 -11   -0.40    0.70
   4   0 -11    0.40    0.70
   4   0 -11    0.70    0.40
   3  -1 -11  435.76   19.50
   3  -1 -11  434.86   19.70
   3  -1 -11  403.86   19.10
   2  -2 -11    4.40    1.30
   2  -2 -11    3.30    0.90
  -1   3  11   18.20    1.70
   1  -3 -11   17.40    1.40
   1  -3 -11   18.40    1.70
   1  -3 -11   14.70    1.40
   0   4  11    4.40    0.90
   0  -4 -11    3.20    0.90
  -7  -4  11    9.20    0.90
   7   4 -11    8.40    0.60
   7   4 -11    8.90    0.80
   7   4 -11    7.90    0.70
  -6  -3  11  204.28    9.10
   6   3 -11  198.48    9.00
   6   3 -11  190.08    9.00
   6   3 -11  196.28    8.90
   5   2 -11  126.59    6.90
   5   2 -11  127.99    6.50
   4   1 -11  192.38    9.00
   4   1 -11  186.98    9.40
   4   1 -11  188.18    8.90
   3   0 -11 1049.89   47.30
   3   0 -11 1078.19   47.70
   3   0 -11 1067.99   47.30
   2  -1 -11  651.53   30.00
   2  -1 -11  708.93   30.60
   2  -1 -11  657.83   31.40
   1  -2 -11   43.30    3.30
   1  -2 -11   41.50    2.80
   1  -2 -11   49.00    2.80
   0   3  11  473.15   20.30
   0  -3 -11  424.66   20.30
   1   4  11    9.00    1.10
   1   4  11    5.90    1.00
  -1  -4 -11    6.50    1.00
  -6  -4  11   28.60    1.60
   6   4 -11   25.60    1.50
   6   4 -11   28.90    1.60
  -5  -3  11   16.50    1.40
   5   3 -11   17.60    1.60
   5   3 -11   15.70    1.50
   5   3 -11   15.00    1.60
   4   2 -11   62.39    4.00
   4   2 -11   64.69    3.70
   3   1 -11  455.35   21.10
   3   1 -11  496.15   21.10
   3   1 -11  448.76   21.50
   2   0 -11    0.40    0.60
   2   0 -11    0.50    0.70
   2   0 -11    0.10    0.40
   1  -1 -11    2.90    0.60
   1  -1 -11    3.40    0.90
   1  -1 -11    2.60    0.80
   0  -2 -11  272.97   12.60
   1   3  11   13.50    1.30
   1   3  11   14.40    1.70
  -1  -3 -11   14.50    1.40
  -1  -3 -11   11.10    1.10
   2   4  11   22.10    1.70
  -2  -4 -11   22.80    1.50
  -2  -4 -11   21.50    2.10
  -5  -4  11   34.70    2.00
   5   4 -11   34.60    2.00
  -4  -3  11  701.83   31.50
   4   3 -11  705.83   31.50
   4   3 -11  710.83   31.50
   3   2 -11  445.56   20.90
   3   2 -11  454.25   20.50
  -2  -1  11  614.54   29.90
   2   1 -11  696.23   30.50
   2   1 -11  708.63   30.10
   1   0 -11   45.40    2.40
   1   0 -11   43.80    3.00
   0   1  11  866.51   40.90
   0  -1 -11  889.91   40.90
   0  -1 -11  994.60   40.70
   1   2  11   36.90    3.00
  -1  -2 -11   40.40    2.50
   2   3  11  352.76   15.60
   2   3  11  372.96   15.80
  -2  -3 -11  316.17   15.50
  -2  -3 -11  328.47   15.70
   3   4  11   69.19    3.70
   3   4  11   73.19    3.60
  -3  -4 -11   77.69    3.60
  -3  -4 -11   68.09    3.70
  -4  -4  11   51.19    2.80
   4   4 -11   39.90    2.70
  -3  -3  11  465.45   21.20
   3   3 -11  482.05   21.30
   2   2 -11    3.50    0.90
   2   2 -11    4.00    1.00
  -1  -1  11    3.30    0.70
   1   1 -11    2.40    0.80
   0   0  11   -0.10    0.40
   0   0 -11    0.10    0.40
   1   1  11  701.83   31.30
  -1  -1 -11  684.63   30.80
   2   2  11    1.80    1.30
  -2  -2 -11    1.50    0.80
   3   3  11  183.48    8.70
   3   3  11  195.38    8.90
  -3  -3 -11  163.08    8.80
  -3  -3 -11  207.48    8.90
   4   4  11    6.60    0.90
  -4  -4 -11    8.10    0.90
  -4  -4 -11    6.00    1.00
  -3  -4  11  133.09    6.70
  -3  -4  11  137.29    6.40
   3   4 -11  138.89    6.70
  -2  -3  11  374.26   17.10
  -2  -3  11  351.96   16.70
   2   3 -11  385.86   16.80
   1   2 -11   45.20    2.90
   1   2 -11   46.80    2.80
   0  -1  11  872.91   39.90
   0   1 -11  921.81   40.20
   1   0  11 1173.08   52.69
   1   0  11 1196.48   52.49
   2   1  11 1386.66   65.29
  -2  -1 -11 1553.74   65.09
   3   2  11  492.55   22.40
   3   2  11  476.05   22.10
  -3  -2 -11  489.05   22.00
   4   3  11  120.69    5.50
  -4  -3 -11   96.09    5.40
  -4  -3 -11  109.19    5.70
   5   4  11  221.28   10.10
  -2  -4  11  127.69    6.20
  -2  -4  11  128.29    5.80
   2   4 -11  128.69    5.90
   2   4 -11  108.49    6.20
  -1  -3  11   19.10    1.50
  -1  -3  11   19.90    1.70
   1   3 -11   20.70    1.70
   0   2 -11  251.37   11.90
   1  -1  11  616.84   28.40
   1  -1  11  650.43   28.30
   2   0  11    0.30    0.70
   2   0  11    1.30    0.60
   3   1  11    1.50    0.90
   3   1  11    0.60    0.90
   4   2  11  443.26   20.00
   4   2  11  431.66   20.30
   5   3  11    0.10    0.70
  -5  -3 -11    0.70    0.90
   6   4  11    5.90    0.60
  -6  -4 -11    5.00    0.60
  -1  -4  11  182.38    9.10
   1   4 -11  224.08    9.20
   1   4 -11  184.08    9.10
   0  -3  11  597.04   23.60
   0  -3  11  463.45   23.50
   0   3 -11  521.95   23.60
   1  -2  11   36.40    2.40
   1  -2  11   35.80    3.30
  -1   2 -11   39.10    2.50
   2  -1  11 1300.87   60.69
   2  -1  11 1343.47   60.29
   2  -1  11 1427.26   60.29
   3   0  11  357.06   16.10
   3   0  11  347.27   16.10
   4   1  11  552.64   25.80
   4   1  11  588.14   25.80
   5   2  11  785.82   35.50
   5   2  11  861.61   35.40
   5   2  11  829.62   35.30
  -5  -2 -11  689.03   35.40
   6   3  11   64.59    3.20
  -6  -3 -11   56.49    3.30
   0  -4  11    5.10    1.00
   0   4 -11    8.80    1.50
   0   4 -11    5.00    1.20
   1  -3  11   19.70    2.00
  -1   3 -11   17.10    2.60
   2  -2  11    1.00    0.90
  -2   2 -11    2.20    0.80
   3  -1  11    2.10    0.80
   3  -1  11    1.40    0.80
   4   0  11    0.70    0.80
   4   0  11   -0.60    0.80
   5   1  11   48.00    3.10
   5   1  11   39.00    2.80
   6   2  11  185.18    8.20
   6   2  11  174.18    8.50
   6   2  11  177.28    8.10
  -6  -2 -11  160.08    8.20
   7   3  11    8.70    0.90
  -7  -3 -11    8.80    1.00
   1  -4  11   13.50    1.30
  -1   4 -11   15.90    1.70
   2  -3  11  562.74   26.20
  -2   3 -11  608.14   26.20
   3  -2  11  504.45   22.10
   3  -2  11  478.95   22.10
   3  -2  11  467.15   22.70
   4  -1  11  551.34   25.60
   4  -1  11  578.74   25.70
   5   0  11  477.75   21.30
   5   0  11  452.95   21.20
   6   1  11  742.73   33.60
   6   1  11  788.72   34.10
   6   1  11  732.93   33.60
   7   2  11   62.89    3.80
   7   2  11   68.59    3.40
   7   2  11   67.19    3.40
  -7  -2 -11   60.79    3.50
   8   3  11  156.98    7.40
  -8  -3 -11  170.08    7.70
   2  -4  11   29.20    2.50
   2  -4  11   32.30    2.10
   3  -3  11  236.38   10.90
   3  -3  11  233.58   11.10
  -3   3 -11  244.88   11.00
   4  -2  11  440.76   20.40
   5  -1  11   39.80    2.80
   5  -1  11   37.60    2.80
   6   0  11   -0.80    1.00
   6   0  11   -0.80    1.10
   7   1  11    4.00    0.90
   7   1  11    3.70    0.90
   7   1  11    1.80    1.10
  -7  -1 -11    3.20    0.90
   8   2  11    1.90    1.10
   8   2  11    2.90    0.60
  -8  -2 -11    3.30    0.90
   3  -4  11  100.79    5.20
   3  -4  11   96.89    5.10
  -3   4 -11  111.69    5.60
   4  -3  11  140.39    6.80
   4  -3  11  135.69    6.50
  -4   3 -11  134.29    6.80
   5  -2  11  870.41   38.50
   5  -2  11  890.21   38.30
   5  -2  11  852.01   38.30
  -5   2 -11  840.02   38.50
   6  -1  11  692.33   32.40
   6  -1  11  768.32   33.20
   7   0  11  247.18   12.30
   7   0  11  265.37   12.10
   7   0  11  269.37   12.00
  -7   0 -11  281.77   12.60
   8   1  11   59.19    3.00
   8   1  11   57.89    3.60
   8   1  11   60.89    3.30
   8   1  11   57.49    3.10
  -8  -1 -11   59.79    3.20
   9   2  11   16.10    1.30
   9   2  11   17.60    1.80
  -9  -2 -11   15.60    1.40
   4  -4  11    7.60    1.20
   4  -4  11    6.70    0.80
  -4   4 -11    3.50    1.30
   5  -3  11    0.30    1.10
   5  -3  11   -0.70    0.70
   5  -3  11   -0.20    0.60
  -5   3 -11    1.70    1.30
   6  -2  11  194.88    8.70
   6  -2  11  182.38    9.00
   6  -2  11  194.98    8.70
  -6   2 -11  189.88    8.80
   7  -1  11    4.40    1.20
   7  -1  11    3.80    1.00
   7  -1  11    3.00    0.60
  -7   1 -11    3.70    0.80
   8   0  11    0.50    0.80
   8   0  11    0.20    1.10
   8   0  11   -0.30    0.80
  -8   0 -11    0.10    0.90
   9   1  11   19.90    2.20
   9   1  11   18.20    1.60
  10   2  11   30.20    1.60
  10   2  11   28.80    1.90
 -10  -2 -11   28.60    1.60
   5  -4  11  237.88   10.70
   5  -4  11  240.48   10.50
  -5   4 -11  228.58   10.90
   6  -3  11   64.79    3.30
   6  -3  11   65.69    3.70
  -6   3 -11   63.79    3.50
   7  -2  11   67.69    3.90
   7  -2  11   69.59    3.50
   7  -2  11   66.39    3.20
  -7   2 -11   68.69    3.50
   8  -1  11   63.49    3.20
   8  -1  11   63.09    3.20
   8  -1  11   61.89    3.60
  -8   1 -11   48.10    3.40
   9   0  11  555.84   24.40
   9   0  11  560.74   24.30
   9   0  11  555.44   24.60
  -9   0 -11  507.35   24.80
  10   1  11   70.09    3.70
  10   1  11   67.29    3.40
 -10  -1 -11   68.89    3.30
   6  -4  11    4.90    0.80
  -6   4 -11    6.30    0.70
   7  -3  11    9.20    1.20
   7  -3  11   10.60    0.90
  -7   3 -11   10.70    1.00
   8  -2  11    4.90    1.10
   8  -2  11    3.70    0.90
  -8   2 -11    2.70    0.70
   9  -1  11   19.00    1.60
   9  -1  11   19.20    2.00
  10   0  11    0.40    0.70
  10   0  11    0.20    0.70
  10   0  11   -0.60    0.90
   8  -3  11  172.38    7.70
   8  -3  11  169.88    7.90
  -8   3 -11  171.68    9.90
   9  -2  11   15.50    1.80
   9  -2  11   18.70    1.40
  10  -1  11   70.29    3.80
  10  -1  11   71.39    3.50
  11   0  11   43.20    2.50
  11   0  11   45.30    2.30
  11   0  11   45.60    2.30
  10  -2  11   30.80    1.90
  10  -2  11   32.40    1.70
  11  -1 -12   15.30    1.10
  11  -1 -12   16.90    1.20
  10  -2 -12  140.79    6.40
  10  -2 -12  139.29    6.40
   9  -3 -12   15.00    1.30
   9  -3 -12   13.30    1.10
   9  -3 -12   12.80    0.90
  11   0 -12    0.20    0.50
  11   0 -12    0.60    0.60
  11   0 -12    0.00    0.60
  10  -1 -12  112.39    5.60
   9  -2 -12    1.90    1.00
   9  -2 -12    1.40    0.70
   9  -2 -12    1.20    0.50
   8  -3 -12    1.80    0.60
   8  -3 -12    2.30    0.70
   8  -3 -12    0.80    0.50
  11   1 -12   19.30    1.30
  11   1 -12   17.30    1.40
  10   0 -12  130.69    6.00
  10   0 -12  127.19    5.90
  10   0 -12  128.09    6.10
   9  -1 -12  256.77   11.70
   9  -1 -12  260.27   11.70
   8  -2 -12  658.93   30.60
   8  -2 -12  700.33   30.60
   8  -2 -12  712.03   30.70
   7  -3 -12  135.09    6.20
   7  -3 -12  141.19    6.10
   7  -3 -12  116.59    6.50
  -6   4  12   11.60    1.00
   6  -4 -12    9.90    1.00
  10   1 -12  110.19    5.10
  10   1 -12  118.49    5.50
  10   1 -12   97.89    5.60
   9   0 -12    0.20    0.70
   9   0 -12   -0.30    0.80
   9   0 -12    0.50    0.80
   8  -1 -12    0.70    0.70
   8  -1 -12    0.90    0.80
   7  -2 -12  211.18    9.60
   7  -2 -12  202.98    9.50
   7  -2 -12  212.18    9.50
  -6   3  12    7.30    0.90
   6  -3 -12    9.30    1.00
   6  -3 -12    7.10    1.10
   6  -3 -12    7.80    0.90
  -5   4  12   12.40    1.10
   5  -4 -12   11.20    1.00
   5  -4 -12   13.00    1.10
  10   2 -12  160.68    7.40
  10   2 -12  159.18    7.30
  10   2 -12  161.68    7.30
   9   1 -12  277.17   12.20
   9   1 -12  273.77   12.30
   9   1 -12  263.67   12.40
   8   0 -12   43.30    2.40
   8   0 -12   45.00    2.60
   8   0 -12   41.80    2.50
   7  -1 -12   50.69    2.80
   7  -1 -12   44.40    2.80
   6  -2 -12   14.70    1.30
   6  -2 -12   14.80    1.20
   6  -2 -12   13.90    1.10
  -5   3  12  234.58   11.00
   5  -3 -12  254.67   10.90
   5  -3 -12  234.68   10.80
   5  -3 -12  245.48   11.00
   5  -3 -12  231.38   10.90
  -4   4  12  230.08   11.60
   4  -4 -12  282.57   11.60
   4  -4 -12  248.38   11.50
   4  -4 -12  264.87   11.50
  -9  -2  12    2.00    0.60
   9   2 -12    1.20    0.70
   9   2 -12    1.70    0.70
   9   2 -12    1.60    0.80
   8   1 -12    2.30    0.90
   8   1 -12    0.30    0.70
   8   1 -12    1.80    0.80
   7   0 -12   -0.30    0.60
   7   0 -12    0.00    1.30
   7   0 -12   -1.00    0.60
   6  -1 -12  262.57   13.60
   6  -1 -12  273.67   12.60
   6  -1 -12  277.07   13.10
   5  -2 -12   13.30    1.20
   5  -2 -12   13.00    1.10
  -4   3  12  115.39    5.70
   4  -3 -12  117.19    5.60
   4  -3 -12  116.09    5.50
  -3   4  12    1.50    1.10
   3  -4 -12    2.80    0.70
   3  -4 -12    3.00    1.30
   3  -4 -12    3.20    0.80
   9   3 -12   13.70    1.00
   9   3 -12   13.30    0.90
   9   3 -12   14.30    1.00
  -8  -2  12  799.32   35.90
   8   2 -12  826.22   36.00
   8   2 -12  788.82   35.80
   8   2 -12  814.32   35.90
   8   2 -12  815.42   35.90
   7   1 -12   46.40    2.30
   7   1 -12   45.30    2.90
   6   0 -12 1212.78   51.89
   6   0 -12 1167.08   51.29
   6   0 -12 1068.29   51.29
   5  -1 -12   18.10    2.30
   5  -1 -12   19.60    2.10
   5  -1 -12   22.70    2.10
   4  -2 -12   72.59    5.10
  -3   3  12   93.49    4.80
   3  -3 -12   93.89    4.50
   3  -3 -12   90.99    4.60
   3  -3 -12   90.89    4.50
   2  -4 -12  310.87   13.80
   2  -4 -12  285.17   13.70
  -8  -3  12    1.30    0.60
   8   3 -12    1.40    0.60
   8   3 -12    1.70    0.60
   8   3 -12    2.10    0.60
   8   3 -12    1.80    0.40
  -7  -2  12  232.78   10.80
   7   2 -12  235.78   10.70
   7   2 -12  239.88   10.80
   7   2 -12  244.28   11.00
   7   2 -12  235.08   10.70
   6   1 -12  293.27   14.00
   6   1 -12  281.37   13.40
   5   0 -12    0.10    0.90
   5   0 -12   -0.40    0.50
   5   0 -12   -0.90    0.80
   4  -1 -12   54.79    3.20
   4  -1 -12   53.79    3.30
   4  -1 -12   52.09    4.60
   3  -2 -12  113.39    6.60
   3  -2 -12  122.59    6.00
  -2   3  12    0.50    0.80
   2  -3 -12    1.20    0.80
   2  -3 -12    1.20    0.70
   2  -3 -12    2.50    0.70
  -1   4  12    3.50    0.90
   1  -4 -12    2.70    0.80
  -7  -3  12  157.98    6.90
   7   3 -12  150.28    6.80
   7   3 -12  156.78    6.80
   7   3 -12  129.19    7.00
   7   3 -12  146.19    6.80
  -6  -2  12   14.20    1.30
   6   2 -12   16.20    1.40
   6   2 -12   14.80    1.30
   6   2 -12   16.50    1.60
   5   1 -12   21.20    1.80
   5   1 -12   20.60    2.30
   5   1 -12   23.80    2.40
   4   0 -12 1364.66   59.69
   4   0 -12 1318.17   59.09
   4   0 -12 1317.07   59.19
   3  -1 -12   22.60    2.90
   3  -1 -12   21.40    1.90
   3  -1 -12   24.30    1.90
   2  -2 -12  168.98    8.10
  -1   3  12   11.80    1.30
   1  -3 -12   11.60    1.00
   1  -3 -12   10.20    1.20
   1  -3 -12    8.80    1.40
   0   4  12   11.10    1.20
   0  -4 -12    9.50    1.10
  -6  -3  12    6.70    0.90
   6   3 -12    8.40    0.90
   6   3 -12    8.60    0.80
   6   3 -12    9.20    0.90
  -5  -2  12   14.00    1.20
   5   2 -12   14.90    2.20
   5   2 -12   14.20    1.20
   5   2 -12   16.50    1.60
   4   1 -12   59.19    3.30
   4   1 -12   56.59    3.80
   4   1 -12   63.09    3.60
   3   0 -12    0.00    0.70
   3   0 -12   -0.60    0.70
   2  -1 -12   73.29    3.80
   2  -1 -12   63.29    3.50
   2  -1 -12   67.09    4.20
   1  -2 -12  236.88   10.80
   1  -2 -12  223.78   11.20
   0   3  12   51.19    2.90
   0  -3 -12   42.10    2.90
   1   4  12   45.10    2.70
  -1  -4 -12   41.50    2.60
  -6  -4  12   11.50    1.00
   6   4 -12   12.50    1.00
   6   4 -12   10.20    1.00
  -5  -3  12  263.47   12.00
   5   3 -12  260.97   11.80
   5   3 -12  255.77   12.00
   5   3 -12  274.97   12.00
   4   2 -12   75.49    4.60
   3   1 -12   25.30    2.20
   3   1 -12   22.20    1.80
   2   0 -12  297.37   14.20
   2   0 -12  321.27   13.90
   2   0 -12  296.67   13.80
  -1   1  12  606.04   28.10
   1  -1 -12  613.64   28.00
   1  -1 -12  665.53   28.40
   0   2  12 1028.80   47.20
   0  -2 -12 1096.49   47.00
   0  -2 -12 1034.00   47.10
   1   3  12   31.30    2.30
   1   3  12   35.70    2.30
  -1  -3 -12   30.10    2.40
  -1  -3 -12   32.40    2.10
   2   4  12  113.19    5.20
  -2  -4 -12   96.79    5.20
  -2  -4 -12  111.09    5.00
  -5  -4  12   14.30    1.20
   5   4 -12   13.80    1.20
  -4  -3  12  128.09    6.00
   4   3 -12  126.19    6.10
   4   3 -12  126.99    6.00
   3   2 -12  120.59    6.00
   3   2 -12  117.59    6.40
  -2  -1  12   64.29    3.50
   2   1 -12   72.19    4.00
   2   1 -12   71.49    3.60
   1   0 -12    0.00    0.50
   1   0 -12    0.70    0.80
   0   1  12  444.56   20.90
   0  -1 -12  476.45   20.70
   1   2  12   26.90    2.70
  -1  -2 -12   28.60    2.20
   2   3  12  362.26   16.00
   2   3  12  361.26   16.20
  -2  -3 -12  344.87   16.00
  -2  -3 -12  338.47   16.10
   3   4  12   71.19    3.60
  -3  -4 -12   67.39    3.20
  -3  -4 -12   55.09    3.30
  -4  -4  12  294.87   13.10
   4   4 -12  287.17   13.10
  -3  -3  12  101.99    4.90
   2   2 -12  166.78    8.80
   2   2 -12  185.98    8.50
  -1  -1  12  659.83   30.30
   1   1 -12  692.53   30.60
   0   0  12   13.40    1.10
   0   0 -12   12.40    1.10
   1   1  12  570.24   25.70
  -1  -1 -12  569.14   25.40
   2   2  12   99.89    5.80
  -2  -2 -12  111.89    5.30
   3   3  12   15.60    1.50
   3   3  12   17.40    1.80
  -3  -3 -12   15.00    1.50
  -3  -3 -12   14.10    1.40
   4   4  12  164.88    7.60
  -4  -4 -12  162.88    7.80
  -4  -4 -12  163.38    7.60
  -3  -4  12    2.20    0.70
  -3  -4  12    2.20    0.80
   3   4 -12    3.40    0.90
  -2  -3  12    1.40    0.70
  -2  -3  12    1.80    0.90
   2   3 -12    0.20    0.70
   2   3 -12    2.50    1.20
   1   2 -12  250.57   12.70
   1   2 -12  249.68   11.70
   0  -1  12  439.46   20.60
   0   1 -12  473.45   20.90
   1   0  12   -0.50    0.50
   1   0  12    0.30    0.70
   2   1  12    8.10    1.20
   3   2  12    4.20    1.20
   3   2  12    6.80    1.90
   4   3  12   30.50    2.10
  -4  -3 -12   26.60    2.00
  -4  -3 -12   27.80    2.10
   5   4  12   30.00    1.80
  -5  -4 -12   32.90    1.80
  -2  -4  12  339.77   15.10
   2   4 -12  313.67   15.00
   2   4 -12  350.16   15.10
  -1  -3  12   12.10    1.30
  -1  -3  12    9.80    1.10
   1   3 -12   12.40    1.20
   1   3 -12   14.00    1.50
   0   2 -12 1061.79   47.70
   1  -1  12  546.95   24.60
   2   0  12  153.08    7.20
   2   0  12  146.49    7.70
   3   1  12  318.17   14.50
   3   1  12  307.07   14.40
   4   2  12  106.59    5.10
   4   2  12  107.19    5.40
  -4  -2 -12   89.59    5.00
   5   3  12   69.49    3.60
  -5  -3 -12   64.09    3.60
  -1  -4  12    4.20    1.00
  -1  -4  12    4.20    0.80
   1   4 -12    4.60    1.00
   1   4 -12    2.60    1.30
   0  -3  12   63.29    3.40
   0   3 -12   58.59    3.40
   1  -2  12   23.30    1.90
   1  -2  12   24.90    3.00
  -1   2 -12   31.20    2.20
   2  -1  12   13.10    2.00
   2  -1  12   12.60    1.40
   2  -1  12   10.20    1.10
   3   0  12    0.20    0.80
   3   0  12    1.60    0.70
   4   1  12   21.60    2.10
   4   1  12   20.70    2.20
   5   2  12   62.59    3.30
   5   2  12   66.89    3.40
   5   2  12   60.69    3.60
  -5  -2 -12   60.79    3.50
   6   3  12    3.20    1.00
   0  -4  12   13.80    1.30
   0   4 -12   14.70    1.40
   0   4 -12   13.50    2.30
   1  -3  12   53.39    3.30
  -1   3 -12   70.29    3.70
   2  -2  12   96.69    6.10
   2  -2  12  102.19    5.30
  -2   2 -12  104.89    5.40
   3  -1  12  296.27   14.00
   3  -1  12  302.37   13.90
   4   0  12   48.90    3.00
   5   1  12  105.89    6.00
   5   1  12  101.59    5.90
   6   2  12  436.46   19.20
   6   2  12  440.46   19.30
   6   2  12  426.26   19.50
  -6  -2 -12  402.96   19.30
   7   3  12   46.50    2.40
  -7  -3 -12   44.90    2.50
   1  -4  12   65.39    3.60
   2  -3  12  447.96   21.20
   2  -3  12  490.05   21.10
   3  -2  12    6.30    1.30
   4  -1  12   20.00    2.00
   4  -1  12   27.00    2.20
   5   0  12   -1.90    0.90
   5   0  12    1.70    1.00
   6   1  12   20.60    2.00
  -6  -1 -12   19.80    1.80
   7   2  12    1.40    0.70
   7   2  12    2.00    0.70
   7   2  12    1.60    1.00
  -7  -2 -12    0.80    0.90
   8   3  12    9.00    0.80
  -8  -3 -12    9.70    1.00
   2  -4  12  158.18    7.70
   2  -4  12  169.58    7.70
   3  -3  12   22.00    2.30
   3  -3  12   19.30    1.90
  -3   3 -12   20.50    2.00
   4  -2  12  111.89    4.90
   4  -2  12   88.79    5.60
  -4   2 -12  102.39    5.30
   5  -1  12   95.99    5.20
   5  -1  12   93.79    5.20
   6   0  12   11.10    2.00
   6   0  12   11.00    1.20
   6   0  12   13.80    1.20
   7   1  12  807.92   35.70
   7   1  12  785.12   35.90
   7   1  12  807.92   35.60
   7   1  12  801.22   35.60
  -7  -1 -12  801.22   35.70
   8   2  12  144.49    6.90
   8   2  12  147.49    6.90
   8   2  12  148.59    7.20
  -8  -2 -12  158.28    7.50
   3  -4  12   93.79    4.70
   3  -4  12   91.99    4.50
  -3   4 -12   94.89    4.90
   4  -3  12   36.60    2.20
   4  -3  12   32.30    2.80
  -4   3 -12   33.50    2.90
   5  -2  12   70.69    3.50
   5  -2  12   66.99    3.90
   5  -2  12   74.99    3.60
  -5   2 -12   68.59    3.80
   6  -1  12   23.60    1.50
   6  -1  12   20.40    2.00
  -6   1 -12   23.40    1.70
   7   0  12   -1.00    0.90
   7   0  12    1.50    0.80
   7   0  12    0.20    0.50
  -7   0 -12   -0.50    0.70
   8   1  12   70.79    3.40
   8   1  12   71.49    3.70
   8   1  12   66.79    3.60
   8   1  12   70.79    4.00
  -8  -1 -12   69.49    3.70
   9   2  12   68.69    3.30
   9   2  12   70.09    3.60
  -9  -2 -12   62.19    3.30
   4  -4  12  223.28   10.10
   4  -4  12  224.68   10.30
  -4   4 -12  222.88   10.20
   5  -3  12   72.59    3.60
   5  -3  12   75.29    4.00
   5  -3  12   74.59    3.60
  -5   3 -12   66.09    4.00
   6  -2  12  448.86   20.50
   6  -2  12  454.05   20.20
   6  -2  12  461.85   20.20
  -6   2 -12  448.06   20.30
   7  -1  12  820.92   37.00
   7  -1  12  841.52   37.00
   7  -1  12  822.92   37.30
  -7   1 -12  850.11   37.10
   8   0  12  219.08   10.00
   8   0  12  208.48    9.70
   8   0  12  220.08    9.90
   8   0  12  215.98   10.20
  -8   0 -12  216.88    9.90
   9   1  12  174.88    8.30
   9   1  12  177.48    8.20
  -9  -1 -12  169.08    8.00
   5  -4  12   34.50    2.00
   5  -4  12   32.90    1.60
  -5   4 -12   33.70    2.00
   6  -3  12    2.40    0.50
   6  -3  12    3.90    0.70
   6  -3  12    1.80    1.10
   7  -2  12    1.30    1.00
   7  -2  12    1.20    0.40
   7  -2  12    1.60    0.60
   7  -2  12    1.90    0.80
  -7   2 -12    0.70    0.80
   8  -1  12   71.69    4.00
   8  -1  12   72.79    3.70
   8  -1  12   69.29    3.70
  -8   1 -12   74.49    3.60
   9   0  12   -0.60    0.70
   9   0  12    0.00    1.70
   9   0  12    0.00    0.70
  -9   0 -12    0.10    0.60
  10   1  12    8.10    1.00
  10   1  12    8.50    1.00
 -10  -1 -12    8.30    0.90
   7  -3  12   48.80    2.70
  -7   3 -12   45.50    2.90
   8  -2  12  160.88    7.50
  -8   2 -12  162.98    7.40
   9  -1  12  178.28    8.10
   9  -1  12  173.08    8.10
   9  -1  12  176.98    8.60
  10   0  12   10.90    0.90
  10   0  12   11.30    1.20
  10   0  12   10.20    1.20
   8  -3  12    9.10    0.90
   8  -3  12    8.20    0.90
  -8   3 -12    7.50    0.70
   9  -2  12   70.09    3.80
   9  -2  12   73.79    3.50
  10  -1  12    8.10    1.00
  10  -1  12    8.70    0.90
  10  -1  12    6.60    0.90
  11  -1 -13   28.90    1.50
  11  -1 -13   27.20    1.60
  10  -2 -13    4.90    0.70
  10  -2 -13    4.80    0.60
   9  -3 -13    0.20    0.40
   9  -3 -13    0.10    0.50
   9  -3 -13   -0.60    0.30
  11   0 -13  201.48    8.50
  11   0 -13  187.38    8.30
  11   0 -13  165.78    8.40
  10  -1 -13   19.20    1.30
  10  -1 -13   18.60    1.40
   9  -2 -13   74.39    3.60
   9  -2 -13   77.89    3.70
   8  -3 -13   82.59    3.90
   8  -3 -13   87.49    4.00
   8  -3 -13   83.79    3.90
  11   1 -13   31.00    1.60
  11   1 -13   30.90    1.70
  11   1 -13   32.10    1.80
  10   0 -13   -0.50    0.60
  10   0 -13    1.00    0.70
  10   0 -13    0.00    0.70
   9  -1 -13   24.20    1.80
   9  -1 -13   22.30    1.60
   8  -2 -13    4.60    0.80
   8  -2 -13    4.00    0.80
   7  -3 -13    0.00    0.60
   7  -3 -13    0.50    0.60
   7  -3 -13    1.40    0.70
  -6   4  13    0.60    0.30
   6  -4 -13    0.90    0.40
   6  -4 -13    1.20    0.50
  10   1 -13   19.60    1.50
  10   1 -13   20.60    1.40
  10   1 -13   20.80    1.60
   9   0 -13  251.47   11.20
   9   0 -13  250.77   11.40
   9   0 -13  244.18   11.30
   8  -1 -13   41.70    2.90
   8  -1 -13   47.10    2.80
   7  -2 -13  829.62   38.10
   7  -2 -13  895.21   38.10
   7  -2 -13  851.81   38.10
   6  -3 -13  249.97   10.80
   6  -3 -13  237.68   10.70
   6  -3 -13  222.18   10.70
  -5   4  13   29.20    1.70
   5  -4 -13   33.30    1.70
   5  -4 -13   30.60    2.00
  10   2 -13    4.70    0.70
  10   2 -13    4.80    0.60
  10   2 -13    5.60    0.70
   9   1 -13   22.10    1.60
   9   1 -13   25.20    1.80
   9   1 -13   21.00    1.70
   8   0 -13   -0.20    0.80
   8   0 -13   -0.70    0.70
   8   0 -13    0.30    0.60
   7  -1 -13  116.89    5.40
   7  -1 -13  111.69    5.40
   6  -2 -13   10.80    1.10
   6  -2 -13   10.40    1.10
   6  -2 -13   12.60    1.00
  -5   3  13    8.40    1.10
   5  -3 -13   11.70    1.00
   5  -3 -13   11.20    1.10
   5  -3 -13    9.70    1.00
   5  -3 -13   10.80    1.10
  -4   4  13    4.50    0.80
   4  -4 -13    3.80    0.70
   4  -4 -13    5.50    0.70
   4  -4 -13    4.00    0.70
  -9  -2  13   87.69    4.50
   9   2 -13   91.99    4.40
   9   2 -13   87.79    4.30
   9   2 -13   90.39    4.20
   8   1 -13   50.29    2.80
   8   1 -13   42.80    3.00
   7   0 -13  623.64   28.10
   6  -1 -13  204.78   12.70
   6  -1 -13  203.98    9.50
   6  -1 -13  208.68    9.60
   6  -1 -13  220.38   10.50
  -5   2  13  180.28    9.70
   5  -2 -13  215.08    9.50
   5  -2 -13  225.68    9.80
   5  -2 -13  218.88    9.60
  -4   3  13  173.08    9.10
   4  -3 -13  217.58    9.10
   4  -3 -13  196.78    9.00
   3  -4 -13  224.98   10.10
   3  -4 -13  221.18   10.10
   3  -4 -13  223.58   10.10
  -9  -3  13    0.20    0.40
   9   3 -13   -0.20    0.40
   9   3 -13    0.00    0.30
   9   3 -13   -0.30    0.50
  -8  -2  13    5.70    0.80
   8   2 -13    6.00    0.80
   8   2 -13    6.20    1.00
   8   2 -13    6.50    0.90
   8   2 -13    5.00    0.50
   7   1 -13  124.09    6.00
   7   1 -13  125.89    5.80
   7   1 -13  124.19    5.70
   7   1 -13  119.09    5.60
   6   0 -13   -0.80    1.00
   6   0 -13   -0.20    1.60
   5  -1 -13    7.40    1.20
   5  -1 -13    8.80    1.90
   5  -1 -13    6.00    1.30
   4  -2 -13  480.25   21.30
   4  -2 -13  472.55   22.10
   4  -2 -13  451.65   21.20
  -3   3  13    3.30    0.90
   3  -3 -13    5.50    0.90
   3  -3 -13    5.10    0.90
   3  -3 -13    3.60    0.80
  -2   4  13    0.90    0.70
   2  -4 -13    0.70    0.60
  -8  -3  13  106.59    4.80
   8   3 -13   91.29    4.40
   8   3 -13   94.79    4.50
   8   3 -13   97.39    4.50
   8   3 -13   99.19    4.50
  -7  -2  13  972.40   44.00
   7   2 -13  971.80   43.80
   7   2 -13 1019.10   44.10
   7   2 -13 1007.10   43.90
   7   2 -13  984.30   43.90
   6   1 -13  219.68   10.40
   6   1 -13  221.58   10.10
   6   1 -13  215.28    9.90
   5   0 -13  966.20   42.80
   5   0 -13  880.51   42.90
   5   0 -13 1031.80   43.50
   4  -1 -13  339.37   15.30
   4  -1 -13  326.37   15.60
   4  -1 -13  307.17   14.80
   3  -2 -13  660.03   30.10
   3  -2 -13  670.93   30.60
   2  -3 -13   36.60    2.10
   2  -3 -13   32.50    2.30
   2  -3 -13   36.80    2.10
  -1   4  13   52.99    3.30
   1  -4 -13   71.09    3.30
  -7  -3  13   -0.50    0.60
   7   3 -13    0.90    0.50
   7   3 -13    0.10    0.50
   7   3 -13    0.10    0.70
   7   3 -13   -0.60    0.50
  -6  -2  13   11.70    1.10
   6   2 -13   13.80    1.20
   6   2 -13   13.20    1.00
   6   2 -13   12.10    1.30
   6   2 -13   13.20    1.30
   5   1 -13    9.20    1.20
   5   1 -13    9.80    1.70
   4   0 -13   -0.80    0.40
   4   0 -13   -0.20    0.70
   4   0 -13    0.50    0.90
   3  -1 -13    8.10    1.50
   3  -1 -13    9.60    1.30
   3  -1 -13    6.40    1.00
   2  -2 -13  327.67   14.70
   2  -2 -13  310.87   15.20
  -1   3  13   13.10    1.40
   1  -3 -13   13.10    1.30
   1  -3 -13   17.70    1.40
   1  -3 -13   13.00    1.30
   0   4  13    1.80    1.00
   0  -4 -13    0.60    0.90
  -6  -3  13  259.57   12.00
   6   3 -13  274.97   11.90
   6   3 -13  265.67   11.90
   6   3 -13  259.57   11.90
  -5  -2  13  226.48   11.10
   5   2 -13  237.38   10.70
   5   2 -13  239.58   10.60
   4   1 -13  351.86   16.10
   4   1 -13  350.56   16.70
   3   0 -13   79.69    4.00
   3   0 -13   79.89    4.10
   3   0 -13   82.79    4.60
   2  -1 -13   29.80    2.20
   2  -1 -13   27.10    2.10
   2  -1 -13   27.30    2.80
   1  -2 -13  471.65   21.40
   0   3  13  148.99    6.90
   0  -3 -13  131.69    6.80
   1   4  13    6.50    0.90
   1   4  13    9.00    1.00
  -1  -4 -13    7.50    1.00
   6   4 -13    0.70    0.40
   6   4 -13    1.30    0.50
  -5  -3  13   12.90    1.40
   5   3 -13   10.40    1.20
   5   3 -13   11.40    0.90
   5   3 -13   10.70    1.10
   4   2 -13  537.15   23.50
   4   2 -13  521.75   23.90
   4   2 -13  510.95   24.40
   3   1 -13    8.40    1.40
   3   1 -13    7.80    1.00
   2   0 -13    0.70    0.40
   2   0 -13    0.50    0.60
   2   0 -13    0.40    0.70
  -1   1  13   56.69    3.40
   1  -1 -13   58.39    3.20
   1  -1 -13   65.69    3.50
   0   2  13   29.60    2.60
   0  -2 -13   28.20    2.20
   1   3  13  346.77   15.50
  -1  -3 -13  314.07   15.50
  -1  -3 -13  355.56   15.40
   2   4  13    0.50    0.60
   2   4  13    0.00    0.60
  -2  -4 -13   -1.40    0.70
  -5  -4  13   38.60    2.30
   5   4 -13   35.00    2.00
   5   4 -13   36.20    2.00
  -4  -3  13  234.18   10.70
   4   3 -13  237.48   10.70
   4   3 -13  219.68   10.50
   3   2 -13  698.33   32.00
  -2  -1  13   25.10    1.80
   2   1 -13   27.70    2.30
   2   1 -13   29.10    1.90
   1   0 -13  924.41   41.90
   1   0 -13  967.70   42.50
   0   1  13   15.20    1.40
   0  -1 -13   13.70    1.30
   1   2  13  222.08   10.10
  -1  -2 -13  187.08    9.50
   2   3  13  170.18    7.70
  -2  -3 -13  167.48    7.70
  -2  -3 -13  147.69    7.80
   3   4  13  314.97   16.10
   3   4  13  371.36   16.00
  -3  -4 -13  355.66   16.30
  -3  -4 -13  385.86   16.00
  -4  -4  13    5.20    0.70
   4   4 -13    4.40    0.70
  -3  -3  13    5.00    0.90
   3   3 -13    4.60    1.00
   2   2 -13  349.57   15.90
   2   2 -13  339.37   16.30
  -1  -1  13   60.09    3.30
   1   1 -13   65.09    3.70
   0   0  13   -6.60   24.80
   0   0 -13   12.70   33.90
   1   1  13   76.79    4.20
   2   2  13  164.28    8.40
   3   3  13   12.80    1.40
  -3  -3 -13   16.90    1.70
  -3  -3 -13   13.20    1.40
   4   4  13    0.10    0.50
  -4  -4 -13    0.50    0.50
  -4  -4 -13    1.30    0.60
   3   4 -13  241.68   11.00
  -2  -3  13   39.10    2.30
  -2  -3  13   36.90    2.40
   2   3 -13   35.20    2.60
   2   3 -13   38.10    2.40
   1   2 -13  525.75   24.20
   1   2 -13  540.05   24.60
   0  -1  13   14.90    1.40
   0   1 -13   13.60    1.60
   1   0  13 3258.27  143.29
   1   0  13 3220.28  143.09
   2   1  13  293.37   13.60
   2   1  13  293.07   13.60
   3   2  13   90.89    5.40
   3   2  13   94.89    5.10
  -3  -2 -13   92.69    4.80
   4   3  13   48.20    2.90
  -4  -3 -13   52.99    2.90
  -4  -3 -13   47.10    2.90
   5   4  13   32.30    1.80
  -5  -4 -13   33.20    1.70
  -2  -4  13    0.40    0.60
  -2  -4  13    1.30    0.80
   2   4 -13    1.60    0.70
   2   4 -13    1.10    0.70
  -1  -3  13   15.50    1.40
  -1  -3  13   16.40    1.70
   1   3 -13   14.00    1.30
   0   2 -13   32.10    2.50
   1  -1  13   71.79    3.90
   2   0  13   -0.50    0.80
   2   0  13   -0.70    0.60
   3   1  13  179.88    8.60
   3   1  13  176.88    8.70
   4   2  13   81.99    4.30
  -4  -2 -13   80.79    4.20
   5   3  13    2.30    0.80
  -5  -3 -13    1.30    0.80
  -1  -4  13   85.29    4.50
  -1  -4  13   84.59    4.30
   1   4 -13  101.89    4.50
   1   4 -13   91.39    4.40
   0  -3  13  171.08    8.20
   0  -3  13  168.48    8.10
   0   3 -13  184.48    8.20
   1  -2  13  218.28   11.70
  -1   2 -13  235.58   11.00
   2  -1  13  295.07   13.70
   3   0  13   51.69    3.10
   3   0  13   54.19    3.20
   4   1  13  196.98    9.70
   4   1  13  203.88    9.70
   5   2  13  741.73   34.00
   5   2  13  783.42   34.10
   5   2  13  735.93   34.30
  -5  -2 -13  791.02   34.20
   6   3  13    6.30    0.80
  -6  -3 -13    6.50    0.90
   0  -4  13    3.30    0.90
   0   4 -13    4.30    1.20
   0   4 -13    3.40    0.80
   1  -3  13  440.66   19.80
   2  -2  13  159.68    8.70
   2  -2  13  143.29    7.70
  -2   2 -13  166.28    7.90
   3  -1  13  181.18    8.60
   3  -1  13  177.58    8.70
   4   0  13    0.00    0.90
   4   0  13    0.40    0.80
   5   1  13   61.59    3.40
   5   1  13   64.99    4.10
   5   1  13   64.39    4.40
   5   1  13   63.79    3.30
  -5  -1 -13   63.69    3.40
   6   2  13   -0.10    0.60
   6   2  13    1.20    0.90
   6   2  13    1.10    0.70
  -6  -2 -13    1.30    0.90
   7   3  13    3.50    0.60
  -7  -3 -13    3.50    0.70
   1  -4  13   10.50    1.10
   1  -4  13   14.10    1.60
   2  -3  13  209.98    9.70
   2  -3  13  206.48    9.70
   3  -2  13   86.29    5.20
   3  -2  13  104.79    4.80
  -3   2 -13   97.99    5.30
   4  -1  13  191.28    9.60
   4  -1  13  204.78    9.60
   5   0  13   10.00    1.60
   6   1  13   17.60    1.50
   6   1  13   12.50    1.20
   6   1  13   12.90    1.40
  -6  -1 -13   12.20    1.30
   7   2  13  110.29    5.60
   7   2  13  121.89    6.10
   7   2  13  120.49    5.60
  -7  -2 -13  119.69    5.80
   8   3  13   23.50    1.30
  -8  -3 -13   24.80    1.40
   2  -4  13   -0.10    0.80
   2  -4  13   -0.10    1.70
  -2   4 -13   -0.10    1.20
   3  -3  13   19.10    2.20
   3  -3  13   19.90    1.90
  -3   3 -13   13.50    2.10
   4  -2  13   81.09    4.00
   4  -2  13   88.09    4.10
   4  -2  13   78.89    4.30
  -4   2 -13   82.49    4.30
   5  -1  13   61.99    3.80
   5  -1  13   62.59    3.50
   5  -1  13   66.39    3.20
  -5   1 -13   57.19    3.60
   6   0  13    0.20    0.70
   6   0  13   -0.50    0.80
   6   0  13    0.30    0.80
   7   1  13  266.17   12.90
   7   1  13  278.67   12.80
  -7  -1 -13  292.17   13.00
   8   2  13  115.79    5.50
   8   2  13  110.69    5.20
   8   2  13  109.89    5.30
  -8  -2 -13  113.39    5.40
   3  -4  13  557.74   24.80
   3  -4  13  534.35   24.80
  -3   4 -13  578.64   24.90
   4  -3  13   54.69    3.30
   4  -3  13   61.29    3.00
  -4   3 -13   53.59    3.50
   5  -2  13  827.12   35.90
   5  -2  13  807.72   35.80
   5  -2  13  781.82   36.00
  -5   2 -13  810.02   35.90
   6  -1  13   13.80    1.20
   6  -1  13   13.90    1.30
   6  -1  13   15.40    1.50
  -6   1 -13   13.10    1.40
   7   0  13   19.90    2.00
   7   0  13   18.10    1.40
   7   0  13   18.50    1.70
  -7   0 -13   16.30    1.60
   8   1  13   87.29    4.40
   8   1  13   91.39    4.30
   8   1  13   90.49    4.70
   8   1  13   85.59    4.20
  -8  -1 -13   88.19    4.40
   9   2  13    8.10    0.90
   9   2  13    9.60    1.20
  -9  -2 -13    6.80    0.80
   4  -4  13    0.00    0.40
   4  -4  13    0.50    0.70
  -4   4 -13    0.00    1.10
   5  -3  13    2.70    1.50
   5  -3  13    2.30    0.60
  -5   3 -13    3.50    1.00
   6  -2  13    1.00    0.60
   6  -2  13    1.00    1.00
   6  -2  13    0.80    0.80
  -6   2 -13    1.40    0.90
   7  -1  13  272.67   12.40
   7  -1  13  267.27   12.80
  -7   1 -13  284.47   12.50
   8   0  13    0.00    0.80
   8   0  13    1.00    1.00
   8   0  13    0.20    0.40
   8   0  13    0.10    0.80
  -8   0 -13    0.60    0.70
   9   1  13   36.90    2.10
   9   1  13   34.60    2.40
  -9  -1 -13   34.70    2.10
   5  -4  13   30.90    1.60
   5  -4  13   35.10    1.90
  -5   4 -13   37.80    1.90
   6  -3  13    7.40    0.70
   6  -3  13    7.50    1.10
   6  -3  13    9.30    0.80
  -6   3 -13    7.90    1.00
   7  -2  13  110.19    5.90
   7  -2  13  124.39    5.70
   7  -2  13  125.29    6.00
  -7   2 -13  128.89    5.80
   8  -1  13   92.49    4.40
   8  -1  13   90.39    4.50
   8  -1  13   90.59    4.70
  -8   1 -13   89.19    4.80
   9   0  13  250.37   11.50
  -9   0 -13  248.88   11.30
  10   1  13   32.80    1.80
  10   1  13   34.10    2.00
 -10  -1 -13   32.10    1.70
   7  -3  13    3.90    0.80
   7  -3  13    5.00    0.60
  -7   3 -13    3.90    0.70
   8  -2  13  119.99    5.90
   8  -2  13  123.99    5.70
  -8   2 -13  125.59    5.70
   9  -1  13   35.60    2.40
   9  -1  13   37.60    2.10
   9  -1  13   35.30    2.10
  -9   1 -13   35.90    2.00
  10   0  13    0.30    0.80
  10   0  13    0.70    0.70
  10   0  13   -0.60    0.60
   8  -3  13   25.50    1.30
   8  -3  13   25.30    1.60
  -8   3 -13   24.80    1.60
   9  -2  13    8.70    0.80
   9  -2  13    7.90    0.90
  10  -1  13   36.20    1.90
  10  -1  13   33.20    1.80
  10  -1  13   33.40    2.10
  11  -1 -14  196.98    8.70
  11  -1 -14  192.08    8.70
  10  -2 -14   66.79    3.20
  10  -2 -14   72.09    3.30
  11   0 -14    0.20    0.50
  11   0 -14    0.10    0.50
  10  -1 -14   97.99    4.50
  10  -1 -14   92.99    4.40
   9  -2 -14   12.30    1.20
   9  -2 -14   15.40    1.10
   8  -3 -14   30.10    1.50
   8  -3 -14   26.80    1.60
   8  -3 -14   27.90    1.50
  11   1 -14  219.98    9.80
  11   1 -14  216.78    9.80
  11   1 -14  219.08    9.80
  10   0 -14   31.70    1.90
  10   0 -14   30.80    1.80
  10   0 -14   31.30    1.90
   9  -1 -14  254.97   11.50
   9  -1 -14  258.07   11.60
   8  -2 -14   41.60    2.10
   8  -2 -14   37.10    2.00
   8  -2 -14   39.90    2.20
   7  -3 -14   10.20    1.00
   7  -3 -14   10.40    0.80
   7  -3 -14    8.80    0.90
  10   1 -14  106.99    5.10
  10   1 -14  107.89    5.00
  10   1 -14  107.79    5.00
   9   0 -14   -0.20    0.70
   9   0 -14    0.10    0.80
   9   0 -14    0.20    0.70
   8  -1 -14  145.09    6.80
   8  -1 -14  149.29    6.90
   7  -2 -14  124.49    5.80
   7  -2 -14  122.99    5.70
   7  -2 -14  119.09    5.60
  -6   3  14    8.20    0.90
   6  -3 -14    8.10    1.00
   6  -3 -14   10.30    1.10
   6  -3 -14   10.60    0.90
  -5   4  14    1.10    0.50
   5  -4 -14    2.10    0.50
   5  -4 -14    2.90    0.50
  10   2 -14   77.79    3.60
  10   2 -14   78.69    3.70
  10   2 -14   77.79    3.60
   9   1 -14  285.57   12.60
   9   1 -14  272.47   12.70
   9   1 -14  281.37   12.60
   8   0 -14  212.08   10.00
   7  -1 -14  140.99    6.60
   7  -1 -14  145.19    6.70
   6  -2 -14   14.50    1.20
   6  -2 -14   13.80    1.10
   6  -2 -14   13.60    1.10
  -5   3  14  139.49    7.20
   5  -3 -14  157.78    7.10
   5  -3 -14  156.38    7.00
   5  -3 -14  155.28    7.10
   5  -3 -14  160.38    7.10
  -4   4  14  145.99    7.60
   4  -4 -14  174.48    7.40
   4  -4 -14  169.68    7.40
   4  -4 -14  167.68    7.50
  -9  -2  14   14.60    1.10
   9   2 -14   14.00    1.10
   9   2 -14   15.40    1.40
   9   2 -14   15.30    1.20
   8   1 -14  156.78    7.40
   8   1 -14  163.98    7.30
   8   1 -14  157.48    7.50
   7   0 -14    0.90    0.70
   7   0 -14    0.20    0.80
   7   0 -14    0.20    0.60
  -5   2  14    2.00    0.70
   5  -2 -14    2.60    0.70
   5  -2 -14    1.90    0.60
   5  -2 -14    4.60    0.80
  -4   3  14    4.30    0.90
   4  -3 -14    4.00    0.80
   4  -3 -14    3.50    0.80
  -3   4  14   28.70    2.00
   3  -4 -14   33.40    1.90
   3  -4 -14   34.00    1.80
   3  -4 -14   33.50    1.90
   8   2 -14   46.50    2.40
   8   2 -14   42.90    2.70
   8   2 -14   46.10    2.60
  -7  -1  14  149.59    7.10
   7   1 -14  147.29    6.90
   7   1 -14  158.28    7.30
   7   1 -14  153.48    7.10
   7   1 -14  158.28    7.10
   6   0 -14   59.19    3.00
   6   0 -14   56.49    4.50
   6   0 -14   63.89    3.00
   5  -1 -14  435.96   20.90
   5  -1 -14  458.65   21.80
   5  -1 -14  489.55   21.60
  -4   2  14   48.60    3.10
   4  -2 -14   58.59    2.90
   4  -2 -14   57.99    2.90
   4  -2 -14   60.99    3.00
   3  -3 -14  782.82   34.40
   3  -3 -14  788.72   34.40
   3  -3 -14  754.12   34.50
  -2   4  14    7.00    0.90
   2  -4 -14    9.00    0.90
  -8  -3  14   33.40    1.80
   8   3 -14   31.00    1.70
   8   3 -14   31.30    1.60
   8   3 -14   33.30    1.70
  -7  -2  14  141.19    6.80
   7   2 -14  148.29    6.70
   7   2 -14  146.99    6.70
   7   2 -14  149.19    6.90
   7   2 -14  142.89    6.60
   6   1 -14   42.30    2.20
   6   1 -14   41.20    2.20
   5   0 -14   -0.10    0.90
   5   0 -14   -0.40    1.00
   4  -1 -14   79.89    4.40
   4  -1 -14   88.49    4.80
   4  -1 -14   81.99    5.40
   3  -2 -14   13.60    1.30
   3  -2 -14   14.90    1.50
   3  -2 -14   16.70    1.50
   3  -2 -14   14.20    2.00
   2  -3 -14  173.18    7.70
   2  -3 -14  155.78    7.80
   2  -3 -14  167.78    7.60
  -1   4  14    8.40    1.00
   1  -4 -14    9.80    0.90
  -7  -3  14   10.50    1.10
   7   3 -14   12.90    1.20
   7   3 -14    9.70    0.90
   7   3 -14   11.90    1.00
   7   3 -14   10.70    1.00
  -6  -2  14   12.70    1.20
   6   2 -14   16.30    1.70
   6   2 -14   15.60    1.50
   6   2 -14   13.60    1.30
   6   2 -14   14.60    1.30
   5   1 -14  500.55   22.80
   5   1 -14  468.35   22.70
   4   0 -14  131.99    6.70
   4   0 -14  114.99    6.00
   3  -1 -14   40.40    3.70
   3  -1 -14   45.90    3.00
   3  -1 -14   41.90    2.70
  -1   3  14   97.29    5.30
   1  -3 -14  103.59    5.30
   1  -3 -14  116.39    5.00
   0   4  14   30.70    2.00
   0  -4 -14   29.30    1.90
  -6  -3  14   12.10    1.20
   6   3 -14   12.80    1.30
   6   3 -14   13.60    1.20
   6   3 -14   10.70    1.00
   6   3 -14   12.30    1.20
  -5  -2  14    4.30    0.80
   5   2 -14    3.40    0.90
   5   2 -14    3.80    0.90
   5   2 -14    3.40    0.80
   5   2 -14    3.30    0.70
   4   1 -14   85.89    5.10
   4   1 -14   83.89    4.50
   3   0 -14    0.40    0.90
   3   0 -14   -0.60    0.40
   3   0 -14   -0.20    0.70
   2  -1 -14  313.77   14.50
   2  -1 -14  327.67   15.80
  -1   2  14   27.00    2.50
   1  -2 -14   28.40    2.30
   0   3  14    4.10    1.00
   0  -3 -14    3.80    1.00
   1   4  14   14.80    1.30
   1   4  14   12.60    1.30
  -1  -4 -14   16.70    1.40
  -5  -3  14  180.08    8.20
   5   3 -14  172.88    8.10
   5   3 -14  177.08    8.10
  -4  -2  14   61.99    3.40
   4   2 -14   67.59    3.40
   4   2 -14   65.09    3.40
   3   1 -14   44.70    2.60
   3   1 -14   42.80    3.20
   2   0 -14  717.33   33.30
   2   0 -14  745.93   33.40
   2   0 -14  784.62   34.00
   1  -1 -14  370.26   16.30
   1  -1 -14  327.17   15.70
   0   2  14  425.66   19.10
   0  -2 -14  396.56   18.70
   1   3  14   27.90    2.50
   1   3  14   39.40    2.50
  -1  -3 -14   35.80    2.50
  -1  -3 -14   41.60    2.60
   2   4  14  102.99    5.10
   2   4  14  101.69    5.00
  -2  -4 -14  109.79    5.10
  -5  -4  14    2.50    0.60
   5   4 -14    2.50    0.50
   5   4 -14    2.70    0.50
  -4  -3  14    3.90    0.80
   4   3 -14    4.40    0.90
  -3  -2  14   15.00    1.40
   3   2 -14   20.30    1.90
   3   2 -14   14.70    1.50
   3   2 -14   18.30    2.10
   2   1 -14  375.56   17.20
   2   1 -14  353.36   16.80
   1   0 -14    0.70    0.80
   0   1  14    0.90    0.80
   0  -1 -14    1.40    0.60
   2   3  14    5.40    1.10
  -2  -3 -14    8.50    1.00
  -2  -3 -14    9.10    1.20
   3   4  14    1.80    0.60
  -3  -4 -14    2.30    0.70
  -3  -4 -14    1.10    0.40
  -4  -4  14  199.38    9.30
   4   4 -14  198.88    9.00
  -3  -3  14  877.01   38.30
   3   3 -14  841.22   38.20
   2   2 -14  876.31   40.00
  -1  -1  14  360.46   16.70
   1   1 -14  373.66   17.20
   0   0  14  409.46   18.60
   1   1  14  465.15   21.10
   2   2  14   41.90    3.40
   2   2  14   45.00    3.30
  -2  -2 -14   44.20    2.60
   3   3  14  207.18    9.40
   3   3  14  195.08    9.60
  -3  -3 -14  221.78    9.50
  -3  -3 -14  187.68    9.50
   4   4  14  310.07   14.30
  -4  -4 -14  326.87   14.30
  -3  -4  14   38.50    2.20
  -3  -4  14   37.50    2.10
   3   4 -14   38.70    2.10
  -2  -3  14  187.18    8.30
  -2  -3  14  173.48    8.40
   2   3 -14  180.38    8.30
   2   3 -14  172.38    8.30
   1   2 -14   27.60    2.50
   1   2 -14   30.60    3.00
   0  -1  14    0.80    0.80
   0   1 -14    0.20    0.80
   1   0  14    0.80    0.90
   2   1  14  524.85   23.70
   2   1  14  516.65   23.60
   3   2  14  102.59    5.80
   3   2  14  118.29    5.40
  -3  -2 -14  104.19    5.40
   4   3  14    0.80    0.80
  -4  -3 -14    2.60    1.10
  -4  -3 -14    1.60    0.80
  -2  -4  14   13.60    1.40
  -2  -4  14   10.30    0.90
   2   4 -14   12.80    1.20
   2   4 -14    8.80    1.00
  -1  -3  14  124.19    6.40
  -1  -3  14  134.99    6.30
   1   3 -14  140.19    6.50
   1   3 -14  132.79    6.30
   0   2 -14  441.26   20.60
   1  -1  14  486.35   22.50
  -1   1 -14  495.05   22.60
   2   0  14   42.80    2.70
   2   0  14   37.10    2.40
   3   1  14  382.86   17.60
   3   1  14  379.26   17.60
   4   2  14  114.69    5.90
  -4  -2 -14  121.49    5.80
   5   3  14   59.09    3.30
  -5  -3 -14   65.59    3.30
  -1  -4  14   11.70    1.20
  -1  -4  14   10.80    1.10
   1   4 -14   13.40    1.40
   1   4 -14   11.90    1.20
   0  -3  14    5.40    1.00
   0  -3  14    3.90    0.80
   0   3 -14    4.60    0.90
   0   3 -14    5.70    1.40
  -1   2 -14   44.40    3.10
   2  -1  14  513.65   23.40
   3   0  14    0.10    0.90
   3   0  14    0.40    1.00
   4   1  14    3.40    1.20
   4   1  14    2.00    1.00
   5   2  14  127.39    6.40
  -5  -2 -14  138.09    6.50
   6   3  14   -0.50    0.50
  -6  -3 -14   -0.40    0.60
   0  -4  14   43.80    2.60
   0   4 -14   52.89    2.60
   0   4 -14   41.70    2.70
   1  -3  14   52.09    2.90
  -1   3 -14   44.00    2.90
   2  -2  14   49.40    2.70
  -2   2 -14   45.40    3.00
   3  -1  14  368.16   17.00
   4   0  14  269.67   13.00
   4   0  14  274.17   12.80
   5   1  14   95.49    4.70
   5   1  14   91.29    4.70
  -5  -1 -14   98.09    4.80
   6   2  14  478.55   21.50
   6   2  14  465.85   21.40
   6   2  14  451.85   21.30
  -6  -2 -14  507.35   21.50
   7   3  14   90.59    4.40
  -7  -3 -14   97.49    4.50
   1  -4  14   22.50    1.80
  -1   4 -14   26.80    2.00
   2  -3  14    8.60    1.20
  -2   3 -14   11.20    1.60
   3  -2  14  129.79    6.60
   4  -1  14    2.80    1.10
   5   0  14   -0.40    0.90
   5   0  14   -0.20    0.60
   5   0  14    0.10    0.80
  -5   0 -14    0.00    0.70
   6   1  14   68.79    3.60
   6   1  14   65.89    3.80
   6   1  14   68.39    3.60
  -6  -1 -14   72.09    3.70
   7   2  14    1.70    0.80
   7   2  14    2.10    0.90
   7   2  14    1.40    0.60
  -7  -2 -14    0.20    1.20
   2  -4  14  172.08    8.60
  -2   4 -14  203.78    8.60
   3  -3  14  266.57   12.10
   3  -3  14  251.47   12.20
  -3   3 -14  280.87   12.30
   4  -2  14  117.89    5.70
   4  -2  14  126.59    5.80
  -4   2 -14  123.99    6.00
   5  -1  14  100.79    5.00
  -5   1 -14  106.29    5.20
   6   0  14  967.10   42.80
   6   0  14  944.71   42.90
  -6   0 -14  973.80   42.80
   7   1  14  146.29    7.00
   7   1  14  148.99    7.30
   7   1  14  153.78    7.10
   7   1  14  153.08    7.10
  -7  -1 -14  152.48    7.20
   8   2  14   13.90    1.00
   8   2  14   16.30    1.50
   8   2  14   15.20    1.70
  -8  -2 -14   13.60    1.30
   3  -4  14    2.40    0.90
   3  -4  14    1.70    0.60
  -3   4 -14    2.20    0.80
   4  -3  14    1.20    1.20
   4  -3  14    1.60    0.70
  -4   3 -14    1.80    1.00
   5  -2  14  142.69    6.50
   5  -2  14  134.19    6.60
  -5   2 -14  140.69    6.60
   6  -1  14   71.89    3.60
   6  -1  14   68.39    3.50
   6  -1  14   67.39    3.80
  -6   1 -14   70.79    3.60
   7   0  14   -0.50    0.80
   7   0  14    0.00    0.80
   7   0  14   -0.20    0.50
  -7   0 -14    0.60    0.80
   8   1  14   34.60    2.40
   8   1  14   31.20    2.10
  -8  -1 -14   31.90    2.10
   9   2  14   60.49    2.80
  -9  -2 -14   58.19    2.90
   4  -4  14  394.96   17.70
   4  -4  14  378.96   17.70
  -4   4 -14  424.16   17.80
   5  -3  14   67.89    3.60
   5  -3  14   68.19    3.40
  -5   3 -14   70.19    3.60
   6  -2  14  501.75   22.50
   6  -2  14  487.55   22.60
   6  -2  14  509.55   22.50
  -6   2 -14  518.15   22.50
   7  -1  14  152.18    7.00
   7  -1  14  150.18    7.30
   7  -1  14  147.69    7.00
  -7   1 -14  156.88    7.10
   8   0  14  183.88    9.30
   8   0  14  201.68    9.20
   8   0  14  202.58    9.50
   8   0  14  202.28    9.10
  -8   0 -14  200.88    9.20
   9   1  14  103.69    5.10
   9   1  14  107.49    5.00
  -9  -1 -14  105.19    5.10
   6  -3  14    0.50    0.40
   6  -3  14    0.10    1.10
  -6   3 -14    0.60    0.70
   7  -2  14    1.90    0.60
   7  -2  14    2.00    0.70
   7  -2  14    1.90    0.40
   7  -2  14    2.80    1.00
  -7   2 -14    1.70    0.90
   8  -1  14   32.60    2.30
   8  -1  14   31.90    2.00
   8  -1  14   29.10    3.10
  -8   1 -14   31.40    2.00
   9   0  14   -0.40    0.80
   9   0  14    0.50    0.70
   9   0  14   -0.30    0.70
  -9   0 -14   -0.30    0.80
  10   1  14    1.10    0.50
  10   1  14    0.90    0.50
 -10  -1 -14    1.50    0.40
   7  -3  14   97.09    4.70
   7  -3  14   99.39    4.50
  -7   3 -14  102.79    4.60
   8  -2  14   16.40    1.30
   8  -2  14   15.80    1.90
  -8   2 -14   15.60    1.20
   9  -1  14  103.59    5.70
   9  -1  14  106.79    5.10
   9  -1  14  111.49    5.00
  -9   1 -14  108.09    5.00
  10   0  14    9.00    1.00
  10   0  14    8.80    1.00
  10   0  14   10.40    1.00
   9  -2  14   66.49    3.10
   9  -2  14   62.49    3.40
  10  -1  14    2.20    0.50
  10  -1  14    1.40    0.40
  10  -1  14    0.70    0.50
  10  -2 -15   48.70    2.40
  10  -2 -15   48.70    2.30
  11   0 -15    8.80    0.70
  11   0 -15    8.50    0.70
  11   0 -15   10.10    0.70
  10  -1 -15   67.99    3.30
  10  -1 -15   72.29    3.40
   9  -2 -15   60.39    2.90
   9  -2 -15   57.19    2.80
   8  -3 -15   65.89    3.10
   8  -3 -15   67.09    3.10
   8  -3 -15   63.79    3.00
  10   0 -15    0.30    0.60
  10   0 -15    0.20    0.60
   9  -1 -15    3.30    0.70
   9  -1 -15    2.50    0.70
   8  -2 -15    1.60    1.10
   8  -2 -15    1.10    0.80
   7  -3 -15   81.69    3.80
   7  -3 -15   84.49    3.90
   7  -3 -15   79.89    3.80
  10   1 -15   78.29    3.80
  10   1 -15   80.69    3.70
  10   1 -15   80.59    3.90
   9   0 -15  509.25   22.30
   9   0 -15  497.05   22.10
   9   0 -15  486.05   22.20
   8  -1 -15  184.28    8.30
   8  -1 -15  181.18    8.40
   7  -2 -15  455.35   20.50
   7  -2 -15  462.75   20.50
  -6   3  15  380.06   18.40
   6  -3 -15  425.16   18.30
   6  -3 -15  415.96   18.30
   6  -3 -15  424.66   18.40
  -5   4  15   33.80    1.80
   5  -4 -15   37.00    1.80
   5  -4 -15   35.80    1.80
  10   2 -15   54.69    2.60
  10   2 -15   56.99    2.70
   9   1 -15    3.90    0.80
   9   1 -15    4.80    1.00
   9   1 -15    3.80    0.80
   8   0 -15   -0.70    0.70
   8   0 -15    0.20    0.80
   8   0 -15    0.80    0.80
   7  -1 -15    0.00    0.70
   7  -1 -15    1.30    0.70
  -6   2  15  225.08   10.90
   6  -2 -15  239.38   10.80
   6  -2 -15  245.18   10.70
   6  -2 -15  240.38   10.70
  -5   3  15    8.90    1.00
   5  -3 -15   12.60    1.00
   5  -3 -15   12.50    1.20
   5  -3 -15   11.10    1.20
   5  -3 -15   11.70    1.00
  -4   4  15    6.70    0.70
   4  -4 -15    6.70    0.60
   4  -4 -15    8.90    0.70
  -9  -2  15   64.39    3.20
   9   2 -15   67.69    3.20
   9   2 -15   67.19    3.30
   9   2 -15   68.59    3.40
  -8  -1  15  187.08    9.00
   8   1 -15  200.88    8.90
   8   1 -15  199.28    9.00
   8   1 -15  199.18    9.10
   7   0 -15  400.96   18.40
   7   0 -15  407.66   18.30
   7   0 -15  416.16   18.20
   6  -1 -15   84.09    4.10
   6  -1 -15   80.99    4.00
   6  -1 -15   88.39    4.10
  -5   2  15   15.60    1.50
   5  -2 -15   16.30    1.50
   5  -2 -15   16.80    1.40
   5  -2 -15   19.50    1.30
  -4   3  15  242.38   12.40
   4  -3 -15  282.17   12.20
   4  -3 -15  287.67   12.20
  -3   4  15   87.09    4.60
   3  -4 -15   84.59    4.10
   3  -4 -15   88.69    4.00
  -8  -2  15    1.40    0.60
   8   2 -15    1.60    0.60
   8   2 -15    1.90    1.10
   7   1 -15    1.10    0.80
   7   1 -15    1.90    0.70
   7   1 -15    1.00    0.80
  -6   0  15    2.70    0.60
   6   0 -15    0.50    0.80
   6   0 -15    0.50    0.40
   5  -1 -15   49.90    2.60
   5  -1 -15   51.59    3.60
   5  -1 -15   47.60    2.60
   5  -1 -15   50.79    2.60
  -4   2  15    3.70    0.90
   4  -2 -15    2.20    0.70
   4  -2 -15    2.10    0.70
   4  -2 -15    3.00    0.70
  -3   3  15    1.10    0.80
   3  -3 -15    2.30    0.80
   3  -3 -15    1.20    0.70
   3  -3 -15    2.00    0.70
  -2   4  15    6.40    0.90
   2  -4 -15    8.00    0.80
   2  -4 -15    7.00    0.70
  -8  -3  15   76.89    3.60
   8   3 -15   71.39    3.40
   8   3 -15   78.59    3.50
   7   2 -15  529.05   23.90
   7   2 -15  537.85   23.90
   7   2 -15  534.15   24.00
   7   2 -15  553.44   24.10
  -6  -1  15   95.19    4.60
   6   1 -15   96.69    4.50
   6   1 -15   96.09    4.80
   6   1 -15   94.69    4.50
   6   1 -15   92.49    4.50
   5   0 -15   15.80    2.00
   5   0 -15   12.60    1.40
   4  -1 -15  289.67   13.90
  -3   2  15  178.88    8.70
   3  -2 -15  189.38    8.50
   3  -2 -15  176.08    8.30
  -2   3  15  189.88   10.40
   2  -3 -15  236.58   10.10
   2  -3 -15  228.58   10.30
   2  -3 -15  237.88   10.10
  -1   4  15    7.80    0.90
   1  -4 -15    7.60    0.80
  -7  -3  15  100.09    4.50
   7   3 -15   93.29    4.40
   7   3 -15   97.49    4.50
   7   3 -15   94.69    4.50
   7   3 -15   93.99    4.60
  -6  -2  15  268.37   12.60
   6   2 -15  282.77   12.60
   6   2 -15  279.77   12.60
   6   2 -15  274.87   12.50
   6   2 -15  289.37   12.70
  -5  -1  15   52.49    2.80
   5   1 -15   50.09    3.50
   5   1 -15   53.79    2.90
   5   1 -15   49.99    2.70
   5   1 -15   52.49    2.70
   5   1 -15   54.19    2.70
   4   0 -15    0.70    1.00
   4   0 -15   -0.10    0.80
   3  -1 -15   85.49    4.60
   3  -1 -15   69.69    4.10
  -2   2  15  199.28    9.70
   2  -2 -15  212.48    9.60
   2  -2 -15  209.88    9.40
  -1   3  15    3.40    1.00
   1  -3 -15    6.80    1.00
   0   4  15   47.20    2.70
   0  -4 -15   53.99    2.70
   6   3 -15  505.55   22.00
   6   3 -15  481.05   22.00
   6   3 -15  497.05   22.00
  -5  -2  15   18.20    1.60
   5   2 -15   20.30    1.60
   5   2 -15   21.40    1.80
   5   2 -15   21.30    1.60
   4   1 -15  298.57   14.70
   4   1 -15  304.27   14.00
   3   0 -15  684.23   32.40
   3   0 -15  747.93   32.70
   2  -1 -15   18.30    1.80
   2  -1 -15   22.60    2.10
  -1   2  15   15.00    1.60
   1  -2 -15   14.10    1.30
   1  -2 -15   14.70    1.40
   0   3  15  102.79    5.20
   0  -3 -15  102.89    5.20
   1   4  15   39.00    2.60
   1   4  15   38.80    2.20
  -1  -4 -15   40.90    2.30
  -5  -3  15   12.50    1.30
   5   3 -15   13.10    1.30
   5   3 -15   13.50    1.30
  -4  -2  15    2.60    0.80
   4   2 -15    2.60    0.90
   4   2 -15    2.90    0.70
   4   2 -15    5.80    0.80
   3   1 -15   85.89    4.50
   3   1 -15   85.29    5.10
   2   0 -15    1.40    0.50
   2   0 -15    0.60    0.60
   2   0 -15    0.10    0.90
   1  -1 -15   -0.10    0.60
   1  -1 -15    0.60    0.80
   0   2  15   -0.30    0.70
   0   2  15    1.80    1.20
   0  -2 -15   -0.10    0.70
   1   3  15   60.99    3.70
   1   3  15   67.59    3.60
  -1  -3 -15   69.59    3.70
  -1  -3 -15   68.09    3.40
   2   4  15    0.40    0.50
   2   4  15    0.00    0.40
  -2  -4 -15    0.90    0.60
  -5  -4  15   46.20    2.20
   5   4 -15   42.90    2.30
   5   4 -15   45.00    2.20
  -4  -3  15  320.27   14.60
   4   3 -15  326.27   14.60
  -3  -2  15  208.18   10.10
   3   2 -15  211.48   10.00
   2   1 -15   20.70    1.80
   2   1 -15   20.40    2.20
   1   0 -15 1606.64   70.19
   1   0 -15 1533.95   69.59
   0  -1 -15  452.75   21.00
   1   2  15   19.50    1.80
   1   2  15   21.90    1.90
  -1  -2 -15   22.50    1.80
  -1  -2 -15   21.80    1.60
   2   3  15  428.46   19.20
   2   3  15  381.56   19.30
  -2  -3 -15  455.05   19.10
  -2  -3 -15  435.76   19.30
   3   4  15    5.50    0.70
  -3  -4 -15    7.30    0.70
  -4  -4  15    9.30    1.00
   4   4 -15    9.20    0.80
   4   4 -15    9.80    1.00
   3   3 -15    1.40    0.80
   2   2 -15  238.38   10.90
  -1  -1  15    1.10    0.70
   1   1 -15    0.10    0.80
   1   1 -15    1.20    0.70
   0   0  15   -0.50    0.80
   0   0 -15    0.50    0.90
   1   1  15  639.54   29.20
   2   2  15    9.40    1.50
   2   2  15   13.10    1.80
  -2  -2 -15   12.00    1.50
  -2  -2 -15   12.20    1.40
   3   3  15  139.39    6.60
   3   3  15  131.69    6.80
  -3  -3 -15  152.38    6.70
  -3  -3 -15  140.19    6.80
  -3  -4  15  106.59    4.80
  -3  -4  15  103.79    4.90
   3   4 -15   97.99    4.70
   3   4 -15  105.29    4.90
  -2  -3  15  266.67   11.70
  -2  -3  15  250.77   11.80
   2   3 -15  265.57   11.70
   2   3 -15  243.08   11.60
  -1  -2  15   15.00    1.40
   1   2 -15   15.30    1.50
   1   2 -15   13.80    1.80
   0  -1  15  413.96   19.10
   0   1 -15  423.86   19.50
   1   0  15  184.98    8.80
   2   1  15  154.48    7.60
   2   1  15  151.68    7.50
   3   2  15   78.59    4.00
   3   2  15   76.79    4.20
  -3  -2 -15   73.99    4.10
  -3  -2 -15   84.49    4.10
   4   3  15  133.09    7.20
  -4  -3 -15  144.19    6.70
  -4  -3 -15  146.59    7.00
  -2  -4  15    7.60    0.70
  -2  -4  15    6.60    0.80
   2   4 -15    6.80    0.60
   2   4 -15    7.90    0.90
  -1  -3  15    6.40    0.90
  -1  -3  15    6.40    1.00
   1   3 -15    5.60    0.90
   1   3 -15    5.10    1.00
   0  -2  15   -0.10    1.10
   0  -2  15    0.60    0.60
   0   2 -15    1.60    0.90
   0   2 -15    1.20    0.90
   1  -1  15  545.95   24.70
  -1   1 -15  542.65   25.00
   2   0  15    0.20    1.00
   3   1  15   37.00    2.80
   4   2  15   31.20    2.20
  -4  -2 -15   32.70    2.30
   5   3  15    6.70    0.80
  -5  -3 -15    8.10    0.90
  -1  -4  15    8.80    0.80
  -1  -4  15   10.30    1.00
   1   4 -15    7.90    0.80
   1   4 -15    9.00    0.90
   0  -3  15  123.09    6.00
   0  -3  15  122.69    6.20
   0   3 -15  133.79    6.10
   0   3 -15  134.39    6.20
   1  -2  15   24.80    1.90
   1  -2  15   23.40    1.60
  -1   2 -15   29.40    2.40
  -1   2 -15   19.80    2.00
   2  -1  15  147.29    7.30
   3   0  15  113.29    5.90
   3   0  15  110.19    5.60
   4   1  15   31.30    2.10
  -4  -1 -15   29.10    2.20
   5   2  15  204.88   10.00
   5   2  15  217.18   10.10
  -5  -2 -15  234.68   10.20
   6   3  15   30.20    1.80
  -6  -3 -15   32.40    1.80
   0  -4  15   62.89    3.30
   0   4 -15   64.69    3.20
   0   4 -15   71.19    3.40
   1  -3  15   83.99    4.60
  -1   3 -15   85.39    4.40
  -1   3 -15  104.59    4.70
   2  -2  15   12.40    1.10
  -2   2 -15   12.10    1.30
   3  -1  15   37.40    2.80
   4   0  15    0.10    1.00
   4   0  15   -0.20    0.60
   4   0  15   -1.30    0.80
  -4   0 -15    0.60    0.80
   5   1  15  220.18   10.50
  -5  -1 -15  233.58   10.50
   6   2  15    7.10    1.00
  -6  -2 -15    8.00    1.10
   7   3  15   19.40    1.20
  -7  -3 -15   21.10    1.30
   1  -4  15   53.79    3.10
  -1   4 -15   69.49    3.20
   2  -3  15  562.14   26.40
  -2   3 -15  618.54   26.40
   3  -2  15   85.29    4.20
  -3   2 -15   84.39    4.30
   4  -1  15   33.50    2.10
   4  -1  15   32.90    2.10
  -4   1 -15   34.40    2.20
   5   0  15   68.79    3.60
   5   0  15   71.59    3.70
  -5   0 -15   69.79    3.60
   6   1  15  105.29    5.10
   6   1  15   99.49    5.30
  -6  -1 -15  105.49    5.30
   7   2  15  152.78    7.30
   7   2  15  154.68    7.30
  -7  -2 -15  166.68    7.40
   2  -4  15    0.10    0.60
  -2   4 -15   -0.60    0.90
   3  -3  15  177.98    8.40
  -3   3 -15  185.98    8.50
   4  -2  15   34.50    2.10
  -4   2 -15   32.00    2.30
   5  -1  15  223.88   10.40
   5  -1  15  230.98   10.40
  -5   1 -15  228.18   10.40
   6   0  15    1.50    0.70
   6   0  15    0.60    0.80
  -6   0 -15   -0.20    0.70
   7   1  15  122.49    6.00
   7   1  15  126.79    6.00
   7   1  15  125.29    7.10
  -7  -1 -15  129.59    6.10
   8   2  15    0.40    0.40
   8   2  15    0.60    0.40
  -8  -2 -15    0.30    0.60
   3  -4  15    9.00    0.90
  -3   4 -15    8.00    0.80
   4  -3  15  149.69    7.50
   4  -3  15  170.98    7.50
  -4   3 -15  160.78    7.60
   5  -2  15  221.58   10.20
   5  -2  15  234.28   10.30
   5  -2  15  211.28   10.40
  -5   2 -15  238.38   10.40
   6  -1  15   99.49    5.00
   6  -1  15   99.69    5.10
   6  -1  15  109.49    4.90
  -6   1 -15  101.59    5.00
   7   0  15    6.40    1.10
   7   0  15    8.50    0.90
   7   0  15    8.90    1.10
   7   0  15    9.30    1.00
  -7   0 -15    6.10    1.00
   8   1  15  396.76   18.10
   8   1  15  397.76   18.10
   8   1  15  400.26   18.00
  -8  -1 -15  414.26   18.10
   5  -3  15    9.10    1.20
   5  -3  15   11.10    1.00
  -5   3 -15    9.50    1.00
   6  -2  15    7.80    1.10
   6  -2  15    7.40    0.80
   6  -2  15    8.70    1.00
  -6   2 -15    6.60    1.00
   7  -1  15  126.69    5.90
   7  -1  15  127.79    6.10
   7  -1  15  124.29    6.10
   7  -1  15  124.09    6.00
  -7   1 -15  131.99    6.00
   8   0  15    0.80    0.80
   8   0  15   -0.10    0.40
   8   0  15   -0.10    0.90
  -8   0 -15    0.70    0.70
   9   1  15   40.80    2.20
   9   1  15   39.20    2.30
  -9  -1 -15   40.90    2.20
   6  -3  15   33.00    1.70
   6  -3  15   34.50    2.00
  -6   3 -15   39.10    2.20
   7  -2  15  166.88    7.40
   7  -2  15  161.28    7.30
   7  -2  15  152.68    7.50
   7  -2  15  160.78    7.60
  -7   2 -15  172.78    7.50
   8  -1  15  418.06   18.60
   8  -1  15  409.66   18.80
   8  -1  15  419.86   18.70
  -8   1 -15  420.86   18.70
   9   0  15  176.68    7.90
   9   0  15  174.28    7.90
   9   0  15  165.78    8.00
  -9   0 -15  173.98    7.90
   7  -3  15   18.90    1.30
  -7   3 -15   22.00    1.50
   8  -2  15    0.30    0.50
   8  -2  15    0.20    0.60
  -8   2 -15   -0.10    0.50
   9  -1  15   40.50    2.30
   9  -1  15   41.60    2.20
   9  -1  15   45.40    2.40
  -9   1 -15   37.40    2.20
  10  -1 -16   20.90    1.30
  10  -1 -16   19.00    1.20
   9  -2 -16   40.50    2.10
   9  -2 -16   44.40    2.20
  10   0 -16  334.07   15.20
  10   0 -16  347.77   15.30
  10   0 -16  342.87   15.20
   9  -1 -16   76.89    3.70
   9  -1 -16   73.49    3.60
   8  -2 -16  151.18    7.00
   8  -2 -16  154.68    7.00
   7  -3 -16   23.20    1.30
   7  -3 -16   21.60    1.30
   7  -3 -16   24.10    1.40
  10   1 -16   24.20    1.40
  10   1 -16   23.80    1.30
  10   1 -16   20.70    1.40
   9   0 -16    0.30    1.10
   9   0 -16   -0.60    0.60
   8  -1 -16  129.49    6.00
   8  -1 -16  129.09    6.00
   7  -2 -16   75.29    3.60
   7  -2 -16   75.39    3.60
   7  -2 -16   72.49    3.50
  -6   3  16    1.60    0.50
   6  -3 -16    2.00    0.60
   6  -3 -16    1.50    0.50
   6  -3 -16    1.30    0.60
   9   1 -16   86.39    4.00
   9   1 -16   83.49    4.10
   9   1 -16   84.89    4.10
   8   0 -16   21.80    1.50
   8   0 -16   19.40    1.60
   8   0 -16   21.30    1.60
   7  -1 -16  235.18   10.50
   7  -1 -16  228.98   10.50
  -6   2  16  356.16   17.00
   6  -2 -16  393.06   16.90
   6  -2 -16  382.06   16.90
   6  -2 -16  377.06   16.80
  -5   3  16  241.38   11.80
   5  -3 -16  264.77   11.70
   5  -3 -16  267.97   11.70
   5  -3 -16  257.37   11.80
   5  -3 -16  271.27   11.60
   4  -4 -16  116.49    5.30
  -9  -2  16   49.20    2.60
   9   2 -16   48.70    2.50
   9   2 -16   49.00    2.40
   9   2 -16   49.60    2.40
   8   1 -16  139.59    6.80
   8   1 -16  148.59    6.60
   8   1 -16  144.69    6.70
   7   0 -16   -0.90    1.00
   7   0 -16   -1.00    1.00
  -6   1  16   56.69    3.00
   6  -1 -16   58.99    2.80
   6  -1 -16   57.79    3.00
   6  -1 -16   59.39    3.00
  -5   2  16  141.29    6.80
   5  -2 -16  136.59    6.60
   5  -2 -16  145.29    6.60
   5  -2 -16  148.49    6.70
  -4   3  16   13.70    1.50
   4  -3 -16   15.90    1.20
   4  -3 -16   14.80    1.20
  -3   4  16    2.60    0.60
   3  -4 -16    2.90    0.40
   3  -4 -16    2.60    0.50
  -8  -2  16  177.18    8.10
   8   2 -16  181.38    8.10
   8   2 -16  176.98    8.00
   8   2 -16  179.18    8.20
  -7  -1  16  252.37   11.60
   7   1 -16  251.07   11.50
   7   1 -16  243.58   11.40
   7   1 -16  265.47   11.70
   7   1 -16  262.37   11.50
  -6   0  16   10.90    1.20
   6   0 -16   16.90    1.50
   6   0 -16   14.50    1.30
   6   0 -16   13.10    1.20
   6   0 -16   13.20    1.10
  -5   1  16  187.88    8.80
   5  -1 -16  191.18    8.70
   5  -1 -16  198.38    8.70
   5  -1 -16  185.88    8.70
  -4   2  16   54.89    3.10
   4  -2 -16   57.09    2.90
   4  -2 -16   51.39    2.80
   4  -2 -16   54.59    2.80
  -3   3  16  186.68    9.00
   3  -3 -16  188.88    8.70
   3  -3 -16  199.08    8.80
   3  -3 -16  192.88    8.70
  -2   4  16   26.30    1.60
   2  -4 -16   23.10    1.50
   2  -4 -16   24.60    1.40
  -7  -2  16   85.29    4.30
   7   2 -16   86.09    4.10
   7   2 -16   87.59    4.20
   7   2 -16   87.29    4.40
   7   2 -16   88.89    4.30
  -6  -1  16   63.39    3.40
   6   1 -16   66.29    3.50
   6   1 -16   62.69    3.20
   6   1 -16   69.89    3.30
   6   1 -16   65.99    3.20
  -5   0  16    0.10    0.60
   5   0 -16   -0.70    0.70
   5   0 -16   -1.10    0.50
   5   0 -16   -0.30    0.50
   5   0 -16    0.60    0.60
  -4   1  16   33.10    2.00
   4  -1 -16   32.40    1.90
   4  -1 -16   28.50    2.30
   4  -1 -16   30.20    1.80
   4  -1 -16   33.30    2.90
  -3   2  16    2.20    0.90
   3  -2 -16    3.00    0.80
   3  -2 -16    3.90    0.70
   3  -2 -16    4.20    0.70
  -2   3  16   21.50    2.00
   2  -3 -16   24.50    1.60
   2  -3 -16   25.80    1.80
  -1   4  16    5.70    1.00
   1  -4 -16    3.40    0.80
  -7  -3  16   29.50    1.70
   7   3 -16   28.60    1.50
   7   3 -16   28.80    1.60
  -6  -2  16  439.06   20.30
   6   2 -16  454.75   20.20
   6   2 -16  471.65   20.40
   6   2 -16  448.46   20.30
   6   2 -16  458.35   20.30
  -5  -1  16  216.28    9.70
   5   1 -16  208.68    9.60
   5   1 -16  215.88    9.80
   5   1 -16  212.28    9.60
   5   1 -16  205.08    9.60
   4   0 -16  508.95   23.00
   4   0 -16  474.95   22.30
   3  -1 -16  420.96   19.20
  -2   2  16  414.76   18.70
   2  -2 -16  418.26   18.60
   2  -2 -16  403.26   18.40
  -1   3  16   66.49    3.80
   1  -3 -16   72.79    3.70
   0   4  16   63.89    3.30
   0  -4 -16   70.49    3.40
  -6  -3  16    1.30    0.70
   6   3 -16    2.70    0.60
   6   3 -16    0.90    0.60
   5   2 -16  171.98    7.80
   5   2 -16  162.48    7.70
  -4  -1  16   37.30    2.10
   4   1 -16   27.20    2.30
   4   1 -16   36.20    2.00
   4   1 -16   36.40    2.50
   4   1 -16   33.50    2.20
   3   0 -16    0.50    0.70
   3   0 -16   -0.50    0.90
   2  -1 -16    8.30    1.00
   2  -1 -16    7.70    1.50
  -1   2  16   13.10    1.30
   1  -2 -16   15.00    1.40
   0   3  16   15.70    1.70
   0  -3 -16   17.00    1.80
   1   4  16    0.20    0.40
   1   4  16    0.10    0.50
  -1  -4 -16    1.20    0.60
  -5  -3  16  326.27   14.60
   5   3 -16  319.07   14.50
   5   3 -16  313.67   14.30
   4   2 -16   63.19    3.30
   4   2 -16   64.69    3.40
   4   2 -16   63.59    3.20
   3   1 -16  575.84   27.50
   3   1 -16  598.04   27.30
   2   0 -16  966.90   43.80
   1  -1 -16  257.97   12.50
   0   2  16  299.17   13.60
   0  -2 -16  279.97   13.40
   0  -2 -16  307.47   13.50
   0  -2 -16  292.67   13.60
   1   3  16   53.89    2.90
   1   3  16   52.69    3.00
  -1  -3 -16   44.40    2.60
  -1  -3 -16   54.99    3.00
   2   4  16  284.37   12.80
   2   4  16  279.27   12.90
  -2  -4 -16  297.47   12.90
  -4  -3  16   19.90    1.60
   4   3 -16   17.30    1.50
   4   3 -16   19.30    1.50
  -3  -2  16    3.00    0.80
   3   2 -16    3.60    0.70
   3   2 -16    4.20    0.90
   3   2 -16    2.00    0.80
   2   1 -16    7.90    1.10
  -1   0  16    0.70    0.90
   1   0 -16    1.10    1.00
   0  -1 -16    0.70    0.90
   1   2  16    1.10    0.80
   1   2  16    3.30    0.90
  -1  -2 -16    1.40    0.70
  -1  -2 -16    0.70    0.80
   2   3  16   12.80    1.40
   2   3  16   12.10    1.30
  -2  -3 -16   14.50    1.30
  -2  -3 -16   17.70    1.70
  -4  -4  16  142.99    6.30
   4   4 -16  141.59    6.30
   4   4 -16  129.59    6.20
  -3  -3  16  216.78   10.00
   3   3 -16  221.88   10.00
   3   3 -16  216.88    9.80
  -2  -2  16  458.85   20.70
   2   2 -16  481.95   20.70
   2   2 -16  442.46   20.70
   1   1 -16  236.28   11.60
   1   1 -16  262.47   12.30
   0   0  16   15.10    1.70
   0   0 -16   15.30    2.00
   1   1  16  330.87   15.50
   2   2  16    9.80    1.20
   2   2  16    9.40    1.10
  -2  -2 -16    5.80    1.00
  -2  -2 -16    9.30    1.00
   3   3  16  151.48    7.10
   3   3  16  150.48    7.30
  -3  -3 -16  163.88    7.10
  -3  -3 -16  143.09    7.40
  -3  -4  16    3.20    0.50
  -3  -4  16    4.10    0.50
   3   4 -16    3.60    0.40
   3   4 -16    3.20    0.60
  -2  -3  16   28.40    1.80
  -2  -3  16   26.10    1.90
   2   3 -16   27.40    1.90
   2   3 -16   22.70    1.70
  -1  -2  16   16.10    1.50
  -1  -2  16   17.10    1.60
   1   2 -16   14.30    1.50
   1   2 -16   15.10    1.60
   0  -1  16    0.70    0.80
   0   1 -16    1.40    1.00
   1   0  16    0.20    0.90
   2   1  16   29.30    2.60
   3   2  16  391.46   17.60
   3   2  16  384.86   17.80
  -3  -2 -16  395.46   17.70
  -3  -2 -16  388.76   17.70
   4   3  16    2.00    0.70
  -4  -3 -16    2.30    0.80
  -4  -3 -16    1.00    0.60
  -2  -4  16   27.90    1.60
  -2  -4  16   28.10    1.50
   2   4 -16   27.10    1.60
  -1  -3  16   79.39    3.90
  -1  -3  16   75.89    4.00
   1   3 -16   77.19    3.90
   1   3 -16   77.29    3.90
   0  -2  16  324.87   14.70
   0  -2  16  327.17   14.80
   0   2 -16  318.77   14.70
   0   2 -16  334.07   14.90
   1  -1  16  327.67   15.20
   2   0  16  100.89    5.60
   3   1  16  431.76   19.50
   3   1  16  436.86   19.60
  -3  -1 -16  429.26   19.50
   4   2  16   18.70    2.00
   4   2  16   21.20    1.90
  -4  -2 -16   20.30    1.80
   5   3  16   13.50    1.20
  -5  -3 -16   12.60    1.20
  -1  -4  16    4.60    0.70
   1   4 -16    5.70    0.70
   1   4 -16    4.30    0.70
   0  -3  16   18.70    1.80
   0  -3  16   20.60    1.50
   0   3 -16   19.60    1.70
   0   3 -16   15.60    1.80
   1  -2  16    1.60    0.80
   1  -2  16    1.70    0.70
  -1   2 -16    1.60    0.70
  -1   2 -16    1.20    0.90
   2  -1  16   32.90    2.50
  -2   1 -16   35.00    2.80
   3   0  16   -0.40    1.00
  -3   0 -16    0.30    0.90
   4   1  16    3.70    0.80
  -4  -1 -16    3.10    0.90
   5   2  16   69.29    3.60
   5   2  16   64.69    3.50
  -5  -2 -16   74.99    3.70
   6   3  16    0.40    0.40
  -6  -3 -16    0.50    0.50
   0  -4  16   74.79    3.70
   0   4 -16   75.99    3.70
   0   4 -16   79.79    3.60
   1  -3  16   62.89    3.40
  -1   3 -16   65.59    3.30
  -1   3 -16   63.49    3.50
   2  -2  16    9.00    1.00
  -2   2 -16    7.60    1.10
   3  -1  16  457.95   20.40
   3  -1  16  455.65   20.30
  -3   1 -16  451.55   20.40
   4   0  16  112.99    5.40
  -4   0 -16  111.49    5.40
   5   1  16  345.37   15.80
  -5  -1 -16  348.47   15.70
   6   2  16  195.48    9.60
   6   2  16  213.28    9.70
  -6  -2 -16  223.08    9.80
   1  -4  16    0.20    0.50
  -1   4 -16    0.10    0.60
   2  -3  16   18.50    1.70
  -2   3 -16   19.40    1.90
   3  -2  16  424.96   19.10
  -3   2 -16  425.16   19.10
   4  -1  16    4.10    0.80
   4  -1  16    4.50    0.80
  -4   1 -16    5.60    0.90
   5   0  16    0.20    0.80
   5   0  16    0.20    0.70
  -5   0 -16    0.10    0.70
   6   1  16   19.40    1.70
   6   1  16   20.30    1.70
  -6  -1 -16   19.60    1.80
   7   2  16    7.00    0.80
   7   2  16    8.10    0.90
  -7  -2 -16    9.00    0.90
   2  -4  16  364.06   17.50
  -2   4 -16  424.66   17.60
   3  -3  16  177.68    8.30
  -3   3 -16  182.58    8.30
   4  -2  16   23.40    1.70
  -4   2 -16   22.40    2.00
   5  -1  16  371.96   16.50
   5  -1  16  362.06   16.40
  -5   1 -16  364.36   16.50
   6   0  16   86.09    4.20
   6   0  16   79.09    4.10
  -6   0 -16   83.69    4.20
  -7  -1 -16   97.09    5.30
   8   2  16   80.49    3.90
   8   2  16   84.49    3.90
  -8  -2 -16   90.89    4.00
   4  -3  16    3.30    0.60
  -4   3 -16    2.30    0.90
   5  -2  16   70.99    3.60
   5  -2  16   75.39    3.70
  -5   2 -16   78.29    3.80
   6  -1  16   21.30    1.60
   6  -1  16   19.80    1.70
  -6   1 -16   20.30    1.70
   7   0  16    0.40    0.80
   7   0  16   -0.50    0.50
   7   0  16    1.00    0.80
  -7   0 -16   -0.70    0.70
   8   1  16    2.30    0.70
   8   1  16    1.60    0.50
  -8  -1 -16    1.30    0.70
   5  -3  16   14.80    1.10
  -5   3 -16   16.40    1.40
   6  -2  16  219.18    9.60
   6  -2  16  186.08   10.20
   6  -2  16  222.58   10.00
  -6   2 -16  224.88    9.80
   7  -1  16   94.19    4.50
   7  -1  16   94.29    4.70
  -7   1 -16   98.29    4.60
   8   0  16  550.54   24.20
   8   0  16  542.75   24.00
   8   0  16  506.05   23.90
   8   0  16  541.95   24.10
  -8   0 -16  551.74   24.00
   9   1  16   58.19    2.90
  -9  -1 -16   58.69    2.80
  -6   3 -16    1.00    0.60
   7  -2  16    7.20    0.60
   7  -2  16    6.90    0.70
   7  -2  16    8.90    0.90
  -7   2 -16    8.50    0.80
   8  -1  16    2.30    0.70
   8  -1  16    2.00    0.70
   8  -1  16    2.20    0.70
  -8   1 -16    3.00    0.70
   9   0  16    0.30    0.50
   9   0  16    0.40    0.60
  -9   0 -16    0.10    0.50
   8  -2  16   94.99    4.10
   8  -2  16   84.39    4.30
   9  -1  16   59.79    2.90
   9  -1  16   63.09    2.90
   9  -1  16   58.39    3.00
  -9   1 -16   60.59    2.90
  10  -1 -17   61.99    2.80
  10  -1 -17   56.09    2.80
   9  -2 -17  219.38    9.80
   9  -2 -17  216.38    9.70
  10   0 -17    0.00    0.50
  10   0 -17    0.10    0.50
   9  -1 -17    1.30    0.60
   9  -1 -17    1.60    0.60
   8  -2 -17    0.90    0.50
   8  -2 -17    1.20    0.60
   7  -3 -17   18.30    1.10
   7  -3 -17   19.70    1.10
   7  -3 -17   18.00    1.00
  10   1 -17   64.89    3.10
  10   1 -17   66.89    3.00
  10   1 -17   63.49    3.10
   9   0 -17  195.68    9.00
   9   0 -17  195.98    9.00
   9   0 -17  201.18    8.90
   8  -1 -17   73.09    3.70
   8  -1 -17   76.39    3.60
   7  -2 -17  177.68    7.60
   7  -2 -17  153.58    7.80
  -6   3  17    7.80    0.90
   6  -3 -17    9.00    0.90
   6  -3 -17    9.10    0.70
   6  -3 -17    9.80    0.90
   9   1 -17    0.90    0.60
   9   1 -17    1.40    0.60
   9   1 -17    1.10    0.60
   8   0 -17   -0.10    0.70
   8   0 -17    0.20    0.70
   7  -1 -17   54.09    2.90
   7  -1 -17   54.99    2.80
  -6   2  17   58.29    3.20
   6  -2 -17   60.29    3.10
   6  -2 -17   61.99    3.00
  -5   3  17   18.60    1.40
   5  -3 -17   19.70    1.40
   5  -3 -17   20.30    1.30
   5  -3 -17   20.10    1.30
  -9  -2  17  225.68   10.40
   9   2 -17  234.28   10.40
   9   2 -17  242.28   10.50
  -8  -1  17   82.39    4.00
   8   1 -17   84.79    4.00
   8   1 -17   79.59    4.10
   8   1 -17   85.89    4.00
  -7   0  17   97.99    4.70
   7   0 -17   98.09    4.70
   7   0 -17  101.89    4.70
   7   0 -17   97.39    4.80
  -6   1  17   11.70    1.30
   6  -1 -17   10.60    1.00
   6  -1 -17   11.90    1.10
   6  -1 -17    9.90    1.00
  -5   2  17  117.59    5.80
   5  -2 -17  120.39    5.60
   5  -2 -17  120.79    5.60
   5  -2 -17  118.69    5.60
   5  -2 -17  121.79    5.60
  -4   3  17  124.09    5.90
   4  -3 -17  116.49    5.90
   4  -3 -17  125.79    5.70
   4  -3 -17  128.99    5.80
  -8  -2  17    1.40    0.50
   8   2 -17    2.40    0.70
   8   2 -17    0.90    0.60
   8   2 -17    1.10    0.50
  -7  -1  17   60.19    3.20
   7   1 -17   64.49    3.20
   7   1 -17   64.39    3.10
   7   1 -17   58.59    2.90
   7   1 -17   60.79    3.30
  -6   0  17    0.50    0.60
   6   0 -17   -0.70    0.70
   6   0 -17    0.40    0.50
   6   0 -17    0.30    0.60
   6   0 -17    0.60    0.70
  -5   1  17   17.30    1.50
   5  -1 -17   18.40    1.30
   5  -1 -17   13.80    1.40
   5  -1 -17   13.30    1.30
  -4   2  17    2.00    0.90
   4  -2 -17    1.50    0.70
   4  -2 -17    2.20    0.70
   4  -2 -17    0.90    0.70
  -3   3  17   27.50    2.50
   3  -3 -17   26.20    2.00
   3  -3 -17   26.90    1.60
  -2   4  17    1.90    0.50
   2  -4 -17    1.50    0.50
   2  -4 -17    1.00    0.40
  -7  -2  17  206.38    9.50
   7   2 -17  213.18    9.40
   7   2 -17  200.68    9.30
   7   2 -17  205.58    9.30
   7   2 -17  217.68    9.90
  -6  -1  17   12.90    1.40
   6   1 -17   13.40    1.20
   6   1 -17   12.50    1.20
   6   1 -17   12.30    1.70
   6   1 -17   13.00    1.10
  -5   0  17  215.28    9.90
   5   0 -17  220.28   10.00
   5   0 -17  218.18    9.80
   5   0 -17  215.08    9.80
   5   0 -17  214.28    9.80
  -4   1  17   16.20    1.50
   4  -1 -17   13.80    1.20
   4  -1 -17   14.50    1.20
   4  -1 -17   16.20    1.40
  -3   2  17   25.90    2.00
   3  -2 -17   21.50    1.80
   3  -2 -17   22.30    1.50
  -2   3  17   25.00    2.00
   2  -3 -17   26.40    1.80
  -1   4  17   61.79    3.00
   1  -4 -17   58.99    2.90
  -7  -3  17   22.40    1.40
   7   3 -17   22.70    1.30
   7   3 -17   21.10    1.10
  -6  -2  17   73.29    3.80
   6   2 -17   76.59    3.80
   6   2 -17   76.19    3.70
   6   2 -17   75.59    3.70
  -5  -1  17   18.80    1.60
   5   1 -17   15.60    1.20
   5   1 -17   15.50    1.40
   5   1 -17   17.30    1.40
   5   1 -17   20.10    1.70
  -4   0  17    0.80    0.60
   4   0 -17    0.40    0.50
   4   0 -17    0.10    0.50
   4   0 -17    0.80    0.50
   4   0 -17    0.50    0.70
  -3   1  17  563.44   24.60
   3  -1 -17  551.04   24.50
   3  -1 -17  528.45   24.30
  -2   2  17  338.97   14.80
   2  -2 -17  302.47   14.40
   2  -2 -17  328.47   14.70
  -1   3  17    0.70    0.80
   1  -3 -17    0.70    0.70
   0   4  17   19.70    1.30
   0  -4 -17   18.10    1.20
  -6  -3  17   11.10    1.10
   6   3 -17   10.50    1.00
   6   3 -17   10.80    1.00
  -5  -2  17  139.99    6.50
   5   2 -17  134.49    6.40
   5   2 -17  136.19    6.40
   5   2 -17  142.69    6.60
  -4  -1  17   18.10    1.50
   4   1 -17   16.90    1.60
   4   1 -17   15.70    1.30
   4   1 -17   17.20    1.50
   3   0 -17  578.74   26.20
   3   0 -17  593.94   27.20
  -2   1  17  104.29    5.20
   2  -1 -17  111.79    6.00
   2  -1 -17  103.09    5.10
  -1   2  17  699.93   30.70
   1  -2 -17  698.83   30.70
   1  -2 -17  658.33   30.40
   0   3  17  108.99    5.60
   0  -3 -17  121.79    5.60
   1   4  17   34.30    1.80
   1   4  17   28.80    1.70
  -1  -4 -17   35.40    1.80
  -5  -3  17   24.20    1.60
   5   3 -17   26.00    1.50
   5   3 -17   23.50    1.60
  -4  -2  17    2.40    1.20
   4   2 -17    2.40    0.90
   4   2 -17    2.40    0.70
  -3  -1  17  616.64   27.70
   3   1 -17  628.54   27.70
   3   1 -17  613.44   27.60
  -2   0  17    0.90    0.90
   2   0 -17   -0.10    1.00
  -1   1  17    4.90    0.90
   1  -1 -17    6.10    1.40
   1  -1 -17    4.40    0.80
   0   2  17   10.90    1.30
   0  -2 -17    8.30    1.10
   1   3  17    3.20    0.90
   1   3  17    1.60    0.80
  -1  -3 -17    2.40    0.90
  -4  -3  17  153.88    7.10
   4   3 -17  143.29    6.80
   4   3 -17  141.49    6.60
  -3  -2  17   27.50    1.90
   3   2 -17   24.90    1.80
   3   2 -17   25.30    1.80
  -2  -1  17  112.89    5.40
   2   1 -17  110.09    5.70
   2   1 -17  111.49    5.30
  -1   0  17  230.88   11.70
   1   0 -17  276.27   13.10
   0   1  17   82.39    4.30
   0  -1 -17   86.39    4.70
   0  -1 -17   87.29    5.00
   1   2  17  249.48   11.30
   1   2  17  242.18   11.20
  -1  -2 -17  235.68   11.10
  -1  -2 -17  242.88   11.20
   2   3  17  270.77   12.90
   2   3  17  279.57   12.80
  -2  -3 -17  300.77   13.00
  -2  -3 -17  264.37   12.50
  -3  -3  17   26.80    2.10
   3   3 -17   31.20    1.90
   3   3 -17   26.80    1.60
  -2  -2  17  356.66   16.10
   2   2 -17  342.07   16.50
   2   2 -17  372.46   16.10
  -1  -1  17    5.60    0.90
   1   1 -17    4.90    1.30
   1   1 -17    4.10    0.90
   0   0  17   -0.70    0.90
   0   0 -17    0.00    1.00
   1   1  17  157.28    7.50
   1   1  17  158.48    7.70
  -1  -1 -17  154.28    7.40
  -1  -1 -17  164.78    7.50
   2   2  17    1.20    0.80
   2   2  17    1.80    0.80
  -2  -2 -17    1.30    0.70
  -2  -2 -17    0.50    0.70
   3   3  17   55.99    2.80
   3   3  17   56.99    3.10
  -3  -3 -17   55.89    2.90
  -3  -3 -17   57.89    3.00
  -2  -3  17   28.30    2.00
  -2  -3  17   25.90    1.80
   2   3 -17   25.20    1.80
  -1  -2  17  754.02   33.30
  -1  -2  17  749.13   33.30
   1   2 -17  752.02   33.20
   1   2 -17  732.13   33.20
   0  -1  17   80.59    4.20
   0  -1  17   78.59    5.00
   0   1 -17   81.79    4.90
   1   0  17  462.55   22.00
  -1   0 -17  501.45   22.60
   2   1  17   40.90    2.60
   2   1  17   43.40    2.60
  -2  -1 -17   38.40    2.50
   3   2  17   48.40    2.70
   3   2  17   49.50    2.90
  -3  -2 -17   48.00    2.80
  -3  -2 -17   47.40    2.90
   4   3  17  110.29    5.30
  -4  -3 -17  110.79    5.20
  -2  -4  17    0.90    0.50
  -2  -4  17    1.60    0.40
   2   4 -17    1.20    0.50
  -1  -3  17    1.50    0.80
  -1  -3  17    1.30    0.70
   1   3 -17    1.10    1.00
   1   3 -17    0.50    0.70
   0  -2  17   10.30    1.10
   0  -2  17   12.80    1.10
   0   2 -17   12.40    1.10
   0   2 -17   11.60    1.20
   1  -1  17  171.28    7.50
   1  -1  17  168.28    7.60
   1  -1  17  155.38    8.00
  -1   1 -17  139.69    8.00
  -1   1 -17  167.88    7.50
   2   0  17    0.00    0.60
  -2   0 -17    0.80    0.70
   3   1  17    2.20    0.70
   3   1  17    1.30    0.80
  -3  -1 -17   -1.20    0.60
  -3  -1 -17    1.50    0.80
   4   2  17   36.40    2.40
  -4  -2 -17   40.00    2.70
  -4  -2 -17   36.80    2.40
   5   3  17    3.10    0.60
  -5  -3 -17    3.30    0.60
  -1  -4  17   68.39    3.30
   1   4 -17   68.29    3.30
   0  -3  17  131.49    6.10
   0  -3  17  128.59    6.10
   0   3 -17  126.19    6.10
   0   3 -17  128.69    6.20
   1  -2  17  264.77   12.00
   1  -2  17  266.97   12.00
  -1   2 -17  260.67   12.00
  -1   2 -17  262.37   12.00
   2  -1  17   44.70    2.50
  -2   1 -17   45.60    2.80
   3   0  17  896.91   38.80
  -3   0 -17  845.22   38.70
   4   1  17  104.19    5.20
  -4  -1 -17  105.89    5.20
   5   2  17  145.89    7.10
   5   2  17  154.18    7.20
  -5  -2 -17  159.78    7.20
  -6  -3 -17    9.60    0.80
   0  -4  17   22.00    1.30
   0   4 -17   20.10    1.20
   0   4 -17   22.50    1.30
   1  -3  17    2.30    0.80
  -1   3 -17    3.00    0.70
  -1   3 -17    2.00    0.90
   2  -2  17    0.50    0.70
  -2   2 -17    1.70    0.90
   3  -1  17    1.70    0.70
   3  -1  17    2.30    0.70
  -3   1 -17    1.60    0.80
   4   0  17    0.30    0.70
   4   0  17   -1.10    0.70
  -4   0 -17    0.90    0.80
   5   1  17  173.28    8.30
  -5  -1 -17  182.18    8.30
   6   2  17    8.30    0.90
  -6  -2 -17    8.60    1.00
   1  -4  17   44.40    2.20
  -1   4 -17   43.00    2.30
   2  -3  17  336.97   15.40
  -2   3 -17  339.37   15.30
   3  -2  17   52.09    2.90
  -3   2 -17   52.49    3.00
   4  -1  17  109.69    5.20
   4  -1  17  110.39    5.30
  -4   1 -17  107.69    5.30
   5   0  17  122.09    5.80
  -5   0 -17  110.39    5.80
   6   1  17  146.09    6.90
   6   1  17  143.39    6.90
  -6  -1 -17  150.68    6.90
   7   2  17  145.39    6.60
   7   2  17  143.49    6.60
   3  -3  17   63.69    3.30
  -3   3 -17   68.09    3.40
   4  -2  17   42.50    2.30
  -4   2 -17   37.80    2.50
   5  -1  17  182.88    8.50
   5  -1  17  190.78    8.60
  -5   1 -17  183.08    8.60
   6   0  17   -0.40    0.60
   6   0  17   -0.30    0.80
  -6   0 -17    0.90    0.80
   7   1  17   21.30    1.50
   7   1  17   22.00    1.60
  -7  -1 -17   19.80    1.60
   4  -3  17  132.99    6.20
  -4   3 -17  136.79    6.30
   5  -2  17  163.78    7.50
   5  -2  17  159.48    7.40
  -5   2 -17  167.48    7.60
   6  -1  17  154.18    7.10
   6  -1  17  152.88    7.10
  -6   1 -17  153.08    7.20
   7   0  17  528.65   23.40
   7   0  17  527.95   23.00
   7   0  17  501.65   23.20
  -7   0 -17  505.25   23.20
   8   1  17   65.69    3.10
   8   1  17   65.19    3.40
  -8  -1 -17   69.39    3.30
   5  -3  17    3.60    0.50
  -5   3 -17    3.40    0.70
   6  -2  17    9.10    1.00
   6  -2  17    9.70    0.90
   6  -2  17    9.30    1.00
  -6   2 -17    9.40    1.00
   7  -1  17   21.20    1.60
   7  -1  17   20.50    1.30
   7  -1  17   22.10    1.60
  -7   1 -17   24.00    1.60
   8   0  17   -0.50    0.60
   8   0  17    0.20    0.30
  -8   0 -17   -0.20    0.60
   7  -2  17  175.08    7.90
  -7   2 -17  175.38    8.00
   8  -1  17   67.49    3.40
   8  -1  17   69.09    3.40
  -8   1 -17   70.79    3.40
   9   0  17   76.19    3.60
  -9   0 -17   74.19    3.50
  10   0 -18   30.90    1.60
  10   0 -18   30.20    1.60
   9  -1 -18  234.98   10.70
   9  -1 -18  244.18   10.70
   8  -2 -18   59.49    2.90
   8  -2 -18   58.89    2.80
   9   0 -18    0.70    0.60
   9   0 -18    1.20    0.60
   9   0 -18    0.20    0.50
   8  -1 -18    7.10    0.80
   8  -1 -18    7.40    0.80
  -7   2  18    0.20    0.40
   7  -2 -18    0.00    0.60
   7  -2 -18    0.90    0.60
  -6   3  18  133.79    6.50
   6  -3 -18  136.19    6.20
   6  -3 -18  136.99    6.20
   6  -3 -18  142.09    6.20
   9   1 -18  283.27   12.40
   9   1 -18  272.57   12.50
   9   1 -18  277.37   12.40
   8   0 -18   27.40    1.80
   8   0 -18   23.00    1.60
   8   0 -18   22.70    1.50
  -7   1  18  238.68   11.40
   7  -1 -18  250.97   11.30
   7  -1 -18  263.57   11.40
  -6   2  18  254.97   11.80
   6  -2 -18  257.17   11.70
   6  -2 -18  267.07   11.70
  -5   3  18   73.69    3.70
   5  -3 -18   80.19    3.60
   5  -3 -18   77.39    3.60
   5  -3 -18   76.89    3.60
  -8  -1  18    6.80    0.80
   8   1 -18    8.50    0.80
   8   1 -18    8.20    0.90
   8   1 -18    7.20    0.90
  -7   0  18   -0.10    0.60
   7   0 -18    1.50    0.70
   7   0 -18    0.10    0.70
   7   0 -18    0.70    0.70
  -6   1  18   26.90    1.80
   6  -1 -18   25.60    1.50
   6  -1 -18   24.10    1.60
   6  -1 -18   26.10    1.70
  -5   2  18    6.20    1.00
   5  -2 -18    6.20    0.70
   5  -2 -18    5.00    0.80
   5  -2 -18    6.50    0.80
  -4   3  18   14.40    1.30
   4  -3 -18   14.70    1.30
   4  -3 -18   12.30    1.00
   4  -3 -18   11.50    1.00
   4  -3 -18   13.90    1.00
  -8  -2  18   63.09    3.20
   8   2 -18   65.89    3.10
   8   2 -18   68.59    3.20
   8   2 -18   66.39    3.10
  -7  -1  18  292.87   13.20
   7   1 -18  295.37   13.10
   7   1 -18  292.47   13.20
   7   1 -18  288.07   13.10
  -6   0  18   39.00    2.30
   6   0 -18   38.80    2.10
   6   0 -18   41.60    2.30
   6   0 -18   39.10    2.30
   6   0 -18   41.80    2.20
  -5   1  18  155.28    7.50
   5  -1 -18  144.99    7.10
   5  -1 -18  150.88    7.30
  -4   2  18  140.79    6.50
   4  -2 -18  126.29    6.20
   4  -2 -18  132.79    6.20
   4  -2 -18  137.89    6.30
  -3   3  18  161.98    7.50
   3  -3 -18  163.58    7.40
   3  -3 -18  154.88    7.20
  -7  -2  18    0.90    0.60
   7   2 -18    0.40    0.60
   7   2 -18    1.10    0.40
   7   2 -18    1.10    0.60
   7   2 -18    0.50    0.40
  -6  -1  18   29.30    1.90
   6   1 -18   28.70    1.70
   6   1 -18   27.70    2.00
   6   1 -18   29.80    1.80
   6   1 -18   27.50    1.70
  -5   0  18   -0.40    0.70
   5   0 -18    1.20    0.80
   5   0 -18   -0.10    0.50
   5   0 -18    0.70    0.60
   5   0 -18   -0.60    0.60
  -4   1  18    0.20    0.60
   4  -1 -18   -0.10    0.50
   4  -1 -18    0.50    0.60
   4  -1 -18   -0.10    0.60
  -3   2  18    4.80    1.00
   3  -2 -18    5.20    0.70
   3  -2 -18    3.00    0.80
  -2   3  18   50.09    3.00
   2  -3 -18   52.99    2.80
  -6  -2  18  310.57   14.10
   6   2 -18  307.47   14.00
   6   2 -18  316.27   14.10
   6   2 -18  313.27   14.10
  -5  -1  18  176.08    8.40
   5   1 -18  161.88    8.00
   5   1 -18  170.58    8.00
  -4   0  18   50.99    2.80
   4   0 -18   50.19    2.70
   4   0 -18   48.80    2.60
  -3   1  18  398.76   17.80
   3  -1 -18  378.76   17.50
   3  -1 -18  403.06   17.70
   2  -2 -18   32.50    2.40
   2  -2 -18   31.70    2.00
  -1   3  18   61.69    3.40
   1  -3 -18   62.59    3.30
  -6  -3  18  173.98    7.70
   6   3 -18  167.48    7.60
   6   3 -18  165.28    7.60
   5   2 -18    5.60    0.80
   5   2 -18    6.30    0.90
   5   2 -18    5.00    0.80
  -4  -1  18    0.00    0.70
   4   1 -18    0.60    0.60
   4   1 -18   -0.20    0.80
   4   1 -18   -0.10    0.60
  -3   0  18    0.70    0.70
   3   0 -18    0.20    0.60
  -2   1  18  300.87   13.50
   2  -1 -18  292.67   13.50
  -1   2  18   37.00    2.40
   1  -2 -18   34.70    2.30
   0   3  18   44.50    2.60
   0  -3 -18   48.00    2.70
  -5  -3  18   93.19    4.40
   5   3 -18   94.59    4.30
   5   3 -18   91.89    4.40
  -4  -2  18  147.99    7.00
   4   2 -18  153.28    6.90
   4   2 -18  147.29    6.80
  -3  -1  18  447.16   20.00
   3   1 -18  444.46   20.00
  -2   0  18  601.14   26.40
   2   0 -18  578.64   26.30
  -1   1  18    9.40    1.10
   1  -1 -18    9.80    1.00
   0   2  18   77.49    4.20
   0  -2 -18   80.59    4.10
   1   3  18   81.89    4.20
   1   3  18   81.49    4.10
  -1  -3 -18   88.39    4.20
  -4  -3  18   15.50    1.30
   4   3 -18   17.80    1.30
   4   3 -18   14.70    1.10
  -3  -2  18    4.90    0.90
   3   2 -18    4.80    0.80
  -2  -1  18  334.27   15.00
   2   1 -18  329.47   15.00
  -1   0  18   -0.40    0.90
  -1   0  18    0.10    0.70
   1   0 -18    0.00    0.60
   0   1  18   36.10    2.20
   0   1  18   31.90    2.20
   0  -1 -18   35.20    2.20
   1   2  18    7.40    1.00
   1   2  18    6.90    1.00
  -1  -2 -18    6.60    1.00
  -1  -2 -18    6.50    0.90
   2   3  18   56.79    3.10
   2   3  18   57.99    3.20
  -2  -3 -18   65.49    3.20
  -2  -3 -18   62.49    3.20
  -3  -3  18  187.68    8.50
   3   3 -18  185.28    8.50
  -2  -2  18   30.60    2.40
  -2  -2  18   34.70    2.80
   2   2 -18   38.40    2.80
  -1  -1  18    8.20    1.00
  -1  -1  18    9.00    1.10
   1   1 -18   12.90    1.10
   1   1 -18   10.80    1.30
   0   0  18  200.98    8.90
   0   0 -18  180.78    8.80
   0   0 -18  191.18    8.80
   1   1  18   11.80    1.20
   1   1  18   11.20    1.20
  -1  -1 -18   10.50    1.00
  -1  -1 -18   10.00    1.10
   2   2  18   43.10    2.50
   2   2  18   46.00    2.70
  -2  -2 -18   40.00    2.40
  -2  -2 -18   41.70    2.60
   3   3  18  112.79    5.50
   3   3  18  124.79    5.50
  -3  -3 -18  109.99    5.40
  -3  -3 -18  114.99    5.70
  -2  -3  18   55.29    3.00
  -2  -3  18   55.39    2.90
   2   3 -18   57.69    3.00
  -1  -2  18   39.90    2.60
  -1  -2  18   40.60    2.40
   1   2 -18   37.60    2.40
   0  -1  18   31.60    2.70
   0  -1  18   38.80    2.30
   0   1 -18   37.10    2.30
   0   1 -18   40.80    2.30
   1   0  18    0.60    0.70
   1   0  18   -0.30    0.60
  -1   0 -18    0.00    0.70
  -1   0 -18   -0.30    0.60
   2   1  18    1.00    0.80
   2   1  18    2.70    0.80
  -2  -1 -18    1.90    0.80
  -2  -1 -18    1.60    0.80
   3   2  18   10.20    1.20
   3   2  18    9.60    1.00
  -3  -2 -18    9.80    1.10
  -3  -2 -18    9.70    1.10
   4   3  18    3.10    0.60
  -4  -3 -18    3.10    0.60
  -4  -3 -18    3.00    0.50
  -1  -3  18   64.79    3.40
  -1  -3  18   68.29    3.40
   1   3 -18   66.39    3.30
   1   3 -18   70.59    3.50
   0  -2  18   83.39    4.50
   0  -2  18   85.59    4.40
   0   2 -18   93.39    4.50
   0   2 -18   74.79    4.50
   1  -1  18   11.70    1.10
   1  -1  18   10.90    1.10
  -1   1 -18   12.40    1.10
  -1   1 -18   10.60    1.10
   2   0  18  345.77   15.70
   2   0  18  345.27   15.60
  -2   0 -18  347.37   15.60
  -2   0 -18  344.47   15.70
   3   1  18   64.89    3.50
   3   1  18   62.39    3.40
  -3  -1 -18   68.49    3.50
  -3  -1 -18   64.39    3.40
   4   2  18   43.80    2.60
  -4  -2 -18   44.10    2.50
  -4  -2 -18   41.10    2.50
   5   3  18   16.40    1.10
  -5  -3 -18   17.40    1.10
   0  -3  18   53.39    2.80
   0  -3  18   52.29    2.70
   0   3 -18   51.39    2.80
   0   3 -18   51.79    2.80
   1  -2  18    9.20    1.00
   1  -2  18    8.80    1.00
  -1   2 -18    8.70    1.00
  -1   2 -18    9.70    1.20
   2  -1  18    0.50    0.70
   2  -1  18    2.30    0.70
  -2   1 -18    1.10    0.80
  -2   1 -18    0.60    0.70
   3   0  18   -0.60    0.70
  -3   0 -18    0.70    0.80
   4   1  18   52.49    2.90
  -4  -1 -18   50.89    2.90
   5   2  18    4.50    0.90
   5   2  18    3.70    0.80
  -5  -2 -18    2.60    0.80
   1  -3  18   91.89    4.60
  -1   3 -18   94.19    4.60
  -1   3 -18   97.39    4.50
   2  -2  18   45.40    2.60
  -2   2 -18   48.20    2.80
   3  -1  18   74.39    3.70
   3  -1  18   66.99    3.50
  -3   1 -18   69.99    3.70
   4   0  18   69.89    3.60
  -4   0 -18   65.89    3.60
   5   1  18  178.08    8.30
  -5  -1 -18  179.48    8.30
   6   2  18   94.79    4.40
   6   2  18   87.69    4.20
  -6  -2 -18   90.79    4.40
   2  -3  18   66.39    3.30
  -2   3 -18   66.59    3.40
   3  -2  18   12.10    1.10
  -3   2 -18   11.60    1.20
   4  -1  18   53.19    2.90
   4  -1  18   52.59    2.80
  -4   1 -18   52.19    3.00
   5   0  18   -0.20    0.80
   5   0  18    0.70    0.70
  -5   0 -18   -0.20    0.80
   6   1  18   49.00    2.70
  -6  -1 -18   48.10    2.70
   7   2  18   48.40    2.50
  -7  -2 -18   53.79    2.60
   3  -3  18  131.49    6.10
  -3   3 -18  131.89    6.10
   4  -2  18   48.40    2.60
  -4   2 -18   49.40    2.80
   5  -1  18  187.28    8.60
   5  -1  18  182.28    8.50
  -5   1 -18  186.48    8.60
   6   0  18   11.80    1.10
   6   0  18    9.10    1.00
  -6   0 -18    9.70    1.10
   7   1  18    9.80    1.00
   7   1  18   10.30    1.00
  -7  -1 -18    9.70    1.00
   4  -3  18    4.10    0.70
  -4   3 -18    5.40    0.90
   5  -2  18    3.10    0.60
  -5   2 -18    3.60    0.80
   6  -1  18   49.50    2.70
   6  -1  18   51.99    2.70
  -6   1 -18   50.79    2.80
   7   0  18    0.20    0.50
   7   0  18    0.80    0.70
  -7   0 -18    0.30    0.70
   8   1  18  147.19    6.70
  -8  -1 -18  144.79    6.70
   5  -3  18   18.20    1.10
  -5   3 -18   21.10    1.30
   6  -2  18   99.39    4.60
   6  -2  18   98.69    4.60
   6  -2  18  101.59    4.70
  -6   2 -18   99.29    4.70
   7  -1  18   11.00    1.20
   7  -1  18    9.60    1.00
   7  -1  18    9.20    0.90
  -7   1 -18   11.30    1.20
   8   0  18   77.69    3.80
  -8   0 -18   79.09    3.80
  -7   2 -18   55.89    2.70
   8  -1  18  146.69    6.80
  -8   1 -18  151.68    6.80
   9  -1 -19   59.79    2.80
   9  -1 -19   59.39    2.80
   8  -2 -19    6.30    0.60
   8  -2 -19    8.00    0.70
   9   0 -19   36.80    1.90
   9   0 -19   38.80    2.00
   8  -1 -19  109.39    5.00
   8  -1 -19  106.79    5.00
  -7   2  19  160.08    8.20
   7  -2 -19  187.48    8.10
   7  -2 -19  187.68    8.10
   6  -3 -19  132.59    6.00
   9   1 -19   65.49    3.20
   9   1 -19   66.49    3.10
  -8   0  19    0.10    0.40
   8   0 -19   -0.20    0.50
   8   0 -19    0.20    0.60
  -7   1  19    7.40    0.80
   7  -1 -19    7.60    0.80
   7  -1 -19    7.00    0.80
  -6   2  19    4.80    0.70
   6  -2 -19    5.00    0.70
   6  -2 -19    5.20    0.70
  -5   3  19   20.00    1.30
   5  -3 -19   20.40    1.20
   5  -3 -19   20.70    1.10
   5  -3 -19   18.80    1.10
  -8  -1  19  119.29    5.50
   8   1 -19  116.39    5.40
   8   1 -19  122.09    5.50
   8   1 -19  118.69    5.60
  -7   0  19   30.40    1.90
   7   0 -19   32.50    1.90
   7   0 -19   32.60    2.00
  -6   1  19    9.10    1.20
   6  -1 -19    9.50    0.90
   6  -1 -19    7.90    0.80
   6  -1 -19    7.80    0.90
   5  -2 -19   89.29    4.50
   5  -2 -19   98.99    4.60
   5  -2 -19   98.29    4.50
   5  -2 -19  100.79    4.50
  -4   3  19  231.98   10.30
   4  -3 -19  211.18    9.70
   4  -3 -19  212.48    9.80
  -8  -2  19    8.20    0.80
   8   2 -19    8.50    0.80
  -7  -1  19    7.10    0.80
   7   1 -19    7.50    0.70
   7   1 -19    7.40    0.80
  -6   0  19    0.00    0.60
   6   0 -19    0.20    0.70
   6   0 -19   -0.40    0.50
   6   0 -19    0.80    0.60
  -5   1  19   39.30    2.30
   5  -1 -19   39.50    2.10
   5  -1 -19   38.10    2.10
   5  -1 -19   38.30    2.10
  -4   2  19    2.90    0.80
   4  -2 -19    2.20    0.70
   4  -2 -19    2.50    0.70
  -3   3  19    1.10    0.70
   3  -3 -19    1.90    0.60
  -7  -2  19  211.78    9.50
   7   2 -19  200.38    9.30
   7   2 -19  218.38    9.40
  -6  -1  19   10.00    1.00
   6   1 -19    8.80    0.80
   6   1 -19   11.40    1.00
   6   1 -19   10.20    1.10
   6   1 -19   10.20    0.90
  -5   0  19  302.97   13.50
   5   0 -19  296.37   13.30
   5   0 -19  295.17   13.30
   5   0 -19  289.97   13.30
  -4   1  19  185.78    8.70
   4  -1 -19  188.38    8.60
   4  -1 -19  182.08    8.40
  -3   2  19    7.80    1.00
   3  -2 -19    6.70    0.90
   3  -2 -19    6.20    0.70
  -2   3  19   99.99    4.80
   2  -3 -19   98.39    4.70
  -6  -2  19    5.70    0.80
   6   2 -19    6.80    0.70
   6   2 -19    5.10    0.70
  -5  -1  19   49.40    2.60
   5   1 -19   43.10    2.40
   5   1 -19   44.30    2.60
   5   1 -19   44.70    2.50
  -4   0  19   -0.10    0.70
   4   0 -19    0.20    0.60
  -3   1  19    8.20    1.00
   3  -1 -19    7.50    0.80
   3  -1 -19    6.70    0.90
  -2   2  19    1.00    0.80
   2  -2 -19   -0.40    0.50
   2  -2 -19   -1.10    0.70
  -1   3  19   12.30    1.30
   1  -3 -19   11.50    1.20
  -5  -2  19  120.79    5.80
   5   2 -19  125.69    5.70
   5   2 -19  111.29    5.50
  -4  -1  19  203.98   10.10
   4   1 -19  221.98    9.80
  -3   0  19  204.58    9.30
   3   0 -19  194.88    9.20
  -2   1  19 1026.90   44.90
   2  -1 -19  989.30   44.80
  -1   2  19  105.19    5.20
   1  -2 -19  103.59    5.10
   0   3  19  211.98    9.80
   0  -3 -19  215.78    9.80
  -5  -3  19   23.40    1.50
   5   3 -19   22.60    1.20
   5   3 -19   23.90    1.40
  -4  -2  19    4.20    0.80
   4   2 -19    3.80    0.70
  -3  -1  19    7.90    1.00
   3   1 -19    7.10    0.90
  -2   0  19   -0.30    0.70
   2   0 -19    0.30    0.70
  -1   1  19  239.38   10.90
   1  -1 -19  232.98   10.80
   0   2  19    1.00    0.80
   0  -2 -19    1.50    0.80
   1   3  19   11.80    1.10
   1   3  19   11.80    1.20
  -1  -3 -19   10.20    1.00
  -4  -3  19  251.77   11.60
   4   3 -19  262.27   11.50
  -3  -2  19    8.50    1.00
   3   2 -19    7.40    0.90
  -2  -1  19 1122.69   49.99
   2   1 -19 1128.69   49.90
  -1   0  19  667.53   29.30
   1   0 -19  643.94   29.20
   0   1  19   16.00    1.50
   0   1  19   15.90    1.60
   0  -1 -19   13.50    1.30
   0  -1 -19   16.20    1.50
   1   2  19  263.77   11.90
   1   2  19  261.37   11.90
  -1  -2 -19  247.88   11.70
  -1  -2 -19  261.77   11.90
   2   3  19  199.18    9.20
   2   3  19  197.68    9.10
  -2  -3 -19  203.28    9.20
   3   3 -19    1.60    0.60
  -2  -2  19    0.70    0.70
  -2  -2  19   -0.20    0.60
   2   2 -19   -0.20    0.70
  -1  -1  19  243.08   11.50
  -1  -1  19  256.07   11.50
   1   1 -19  250.17   11.40
   1   1 -19  251.67   11.40
   0   0  19   -0.40    0.60
   0   0  19    0.40    0.70
   0   0 -19    0.20    0.60
   0   0 -19    0.50    0.70
   1   1  19   62.19    3.40
   1   1  19   65.09    3.40
  -1  -1 -19   64.29    3.40
  -1  -1 -19   60.29    3.30
   2   2  19   11.60    1.20
   2   2  19    8.20    1.00
  -2  -2 -19    9.70    1.10
  -2  -2 -19    9.60    1.00
   3   3  19    4.40    0.60
  -3  -3 -19    5.00    0.70
  -3  -3 -19    3.20    0.50
  -2  -3  19  111.49    5.20
  -2  -3  19  109.89    5.20
   2   3 -19  111.69    5.20
  -1  -2  19  111.19    5.30
  -1  -2  19  111.49    5.30
   1   2 -19  103.89    5.20
   1   2 -19  110.09    5.30
   0  -1  19   15.50    1.60
   0  -1  19   14.90    1.50
   0   1 -19   16.30    1.50
   0   1 -19   16.20    1.60
   1   0  19   75.09    3.80
   1   0  19   74.09    3.80
  -1   0 -19   73.99    3.80
  -1   0 -19   74.39    3.80
   2   1  19   31.70    2.10
   2   1  19   33.10    2.20
  -2  -1 -19   33.80    2.20
  -2  -1 -19   32.20    2.10
   3   2  19    4.90    0.70
   3   2  19    7.50    1.00
  -3  -2 -19    5.90    1.10
  -3  -2 -19    6.80    1.20
   4   3  19  147.99    6.70
  -4  -3 -19  145.69    6.60
  -4  -3 -19  142.09    6.60
  -1  -3  19   12.70    1.10
  -1  -3  19   12.00    1.20
   1   3 -19   10.30    1.10
   1   3 -19   12.20    1.20
   0  -2  19    0.90    0.70
   0  -2  19    1.40    0.70
   0   2 -19    0.60    0.80
   0   2 -19    1.20    0.80
   1  -1  19   69.19    3.60
   1  -1  19   70.69    3.60
  -1   1 -19   68.09    3.60
  -1   1 -19   70.09    3.60
   2   0  19    0.10    0.70
   2   0  19    0.50    0.70
  -2   0 -19   -0.70    0.60
  -2   0 -19   -0.40    0.80
   3   1  19   59.49    3.30
   3   1  19   59.99    3.10
  -3  -1 -19   59.59    3.20
  -3  -1 -19   59.89    3.30
   4   2  19   89.29    4.30
  -4  -2 -19   84.79    4.30
  -4  -2 -19   87.09    4.30
   0  -3  19  231.78   10.60
   0  -3  19  234.58   10.70
   0   3 -19  245.48   10.70
   0   3 -19  229.08   10.60
   1  -2  19  282.07   12.80
   1  -2  19  284.17   12.90
  -1   2 -19  289.57   12.90
  -1   2 -19  280.37   12.90
   2  -1  19   37.50    2.30
  -2   1 -19   34.60    2.40
  -2   1 -19   32.90    2.30
   3   0  19  505.85   21.90
  -3   0 -19  467.75   21.90
   4   1  19  204.48    9.40
  -4  -1 -19  202.78    9.40
   5   2  19   24.60    1.60
  -5  -2 -19   23.20    1.60
   1  -3  19   14.30    1.20
  -1   3 -19   12.10    1.30
  -1   3 -19   11.00    1.20
   2  -2  19   12.10    1.10
  -2   2 -19    8.10    1.20
  -2   2 -19   12.40    1.20
   3  -1  19   65.69    3.50
  -3   1 -19   65.79    3.50
   4   0  19   -0.40    0.60
  -4   0 -19    0.60    0.80
   5   1  19    3.60    0.80
  -5  -1 -19    2.10    0.80
   6   2  19    0.10    0.50
  -6  -2 -19    0.90    0.50
   2  -3  19  231.68   10.30
  -2   3 -19  223.98   10.30
   3  -2  19    8.60    1.00
  -3   2 -19    9.00    1.10
   4  -1  19  215.98    9.90
  -4   1 -19  215.38    9.90
   5   0  19  268.47   12.10
  -5   0 -19  262.17   12.10
   6   1  19   60.59    3.10
   6   1  19   60.29    3.10
  -6  -1 -19   60.49    3.10
   3  -3  19    4.50    0.70
  -3   3 -19    3.70    0.80
   4  -2  19   90.79    4.60
  -4   2 -19   93.39    4.80
   5  -1  19    2.00    1.00
   5  -1  19    1.30    0.70
  -5   1 -19    3.00    0.90
   6   0  19   -0.90    0.50
  -6   0 -19    0.80    0.70
   7   1  19    1.90    0.60
   7   1  19    2.30    0.50
  -7  -1 -19    1.60    0.60
   4  -3  19  173.08    7.90
  -4   3 -19  176.08    7.90
   5  -2  19   25.00    1.60
  -5   2 -19   27.20    1.70
   6  -1  19   65.29    3.20
  -6   1 -19   63.29    3.30
   7   0  19  109.09    5.30
   7   0  19  117.49    5.40
  -7   0 -19  116.49    5.40
   6  -2  19    0.60    0.40
  -6   2 -19    0.60    0.60
   7  -1  19    2.10    0.60
   7  -1  19    1.70    0.40
  -7   1 -19    2.20    0.60
   8   0  19   -0.60    0.40
  -8   0 -19    0.70    0.50
   9   0 -20    0.50    0.50
   9   0 -20   -0.40    0.40
   8  -1 -20    0.00    0.50
   8  -1 -20    0.10    0.50
  -7   2  20    2.00    0.40
   7  -2 -20    2.00    0.50
   7  -2 -20    3.10    0.50
  -8   0  20   72.79    3.70
   8   0 -20   70.29    3.40
   8   0 -20   73.39    3.40
  -7   1  20   72.69    3.50
   7  -1 -20   72.09    3.50
   7  -1 -20   73.69    3.50
  -6   2  20  215.28    9.70
   6  -2 -20  212.18    9.60
   6  -2 -20  213.48    9.60
  -5   3  20   56.29    2.70
  -8  -1  20    0.30    0.40
   8   1 -20    0.20    0.50
   8   1 -20   -0.20    0.50
  -7   0  20    0.00    0.50
   7   0 -20    0.80    0.60
   7   0 -20   -0.30    0.50
  -6   1  20   61.29    3.00
   6  -1 -20   57.49    2.70
   6  -1 -20   60.09    2.90
   6  -1 -20   54.59    2.90
  -5   2  20    0.20    0.60
   5  -2 -20   -0.20    0.40
   5  -2 -20   -0.20    0.50
   5  -2 -20    0.60    0.60
  -4   3  20   10.50    1.00
   4  -3 -20   10.20    0.90
   4  -3 -20   10.60    0.70
  -7  -1  20   81.69    3.90
   7   1 -20   80.49    3.70
   7   1 -20   81.69    3.80
  -6   0  20   37.20    2.60
   6   0 -20   35.20    2.20
   6   0 -20   37.00    2.00
  -5   1  20  242.38   10.70
   5  -1 -20  235.38   10.60
   5  -1 -20  236.78   10.60
   5  -1 -20  223.38   10.60
  -4   2  20   92.99    4.50
   4  -2 -20   74.29    4.50
   4  -2 -20   81.59    3.90
  -3   3  20   11.50    1.20
   3  -3 -20   12.70    1.10
  -7  -2  20    2.70    0.50
   7   2 -20    1.90    0.50
  -6  -1  20   67.29    3.70
   6   1 -20   65.99    3.20
   6   1 -20   67.29    3.30
  -5   0  20   -0.30    0.70
   5   0 -20    0.60    0.60
   5   0 -20   -0.50    0.50
  -4   1  20   33.60    2.20
   4  -1 -20   34.60    1.80
   4  -1 -20   32.60    2.00
  -3   2  20    0.50    0.80
   3  -2 -20    0.30    0.70
   3  -2 -20    0.60    0.60
  -2   3  20   51.89    2.60
   2  -3 -20   48.40    2.50
  -6  -2  20  243.28   11.00
   6   2 -20  243.48   10.90
   6   2 -20  241.38   10.80
  -5  -1  20  266.77   12.00
   5   1 -20  261.77   11.90
   5   1 -20  265.07   11.90
  -4   0  20   12.50    1.20
   4   0 -20   12.10    1.30
  -3   1  20  273.97   12.50
   3  -1 -20  270.57   12.40
  -2   2  20   17.90    1.70
   2  -2 -20   21.30    1.60
   2  -2 -20   17.60    1.20
  -1   3  20   49.60    2.60
   1  -3 -20   48.40    2.50
  -5  -2  20    0.30    0.60
   5   2 -20   -0.50    0.60
   5   2 -20    0.20    0.70
  -4  -1  20   41.80    2.40
   4   1 -20   38.20    2.30
  -3   0  20    0.70    0.80
   3   0 -20   -0.50    0.60
  -2   1  20   49.50    3.00
   2  -1 -20   52.39    2.90
  -1   2  20   42.00    2.50
   1  -2 -20   38.30    2.40
   0   3  20    7.80    0.80
   0  -3 -20    8.30    0.80
  -5  -3  20   63.99    3.10
  -4  -2  20   98.39    4.80
   4   2 -20  101.59    4.80
  -3  -1  20  299.47   13.60
   3   1 -20  299.87   13.60
  -2   0  20  163.68    7.60
   2   0 -20  159.28    7.50
  -1   1  20   60.59    3.50
   1  -1 -20   51.99    3.50
   0   2  20  168.78    7.90
   0  -2 -20  167.48    7.90
   1   3  20  145.69    7.00
   1   3  20  155.38    7.00
  -1  -3 -20  159.68    7.10
  -4  -3  20   12.50    1.10
   4   3 -20   12.10    1.00
  -3  -2  20    1.00    0.70
   3   2 -20    1.10    0.70
  -2  -1  20   60.39    3.40
   2   1 -20   61.79    3.30
  -1   0  20    0.00    0.70
   1   0 -20    0.10    0.70
   0   1  20   31.90    2.60
   0   1  20   31.30    2.10
   0  -1 -20   29.20    2.60
   0  -1 -20   31.30    1.90
   1   2  20    1.60    0.70
   1   2  20    1.80    0.80
  -1  -2 -20    1.20    0.80
  -1  -2 -20    1.20    0.60
   2   3  20   60.79    3.00
   2   3  20   61.39    3.00
  -2  -3 -20   63.89    3.10
  -3  -3  20   13.50    1.10
   3   3 -20   13.70    1.10
  -2  -2  20   23.10    1.60
  -2  -2  20   15.70    1.60
   2   2 -20   21.70    1.60
  -1  -1  20   67.29    3.40
  -1  -1  20   62.99    4.00
   1   1 -20   62.79    3.30
   0   0  20   55.29    3.00
   0   0  20   55.39    3.00
   0   0 -20   54.29    3.00
   0   0 -20   54.39    2.90
   1   1  20   47.60    2.70
   1   1  20   50.19    2.80
  -1  -1 -20   43.90    2.70
  -1  -1 -20   44.70    2.60
   2   2  20   57.19    3.40
   2   2  20   55.69    2.90
  -2  -2 -20   50.49    3.20
  -2  -2 -20   53.69    2.80
   3   3  20   14.60    1.10
  -2  -3  20   55.69    2.90
  -2  -3  20   59.19    2.90
   2   3 -20   57.99    3.10
  -1  -2  20   46.00    2.50
  -1  -2  20   43.50    2.60
   1   2 -20   46.70    2.60
   1   2 -20   43.80    2.90
   0  -1  20   33.50    2.40
   0  -1  20   33.90    2.20
   0   1 -20   35.50    2.20
   0   1 -20   34.90    2.30
   1   0  20    2.50    0.80
   1   0  20    0.40    0.70
  -1   0 -20    0.40    0.80
  -1   0 -20    0.70    0.70
   2   1  20   18.90    1.70
   2   1  20   14.80    1.50
  -2  -1 -20   15.40    1.50
  -2  -1 -20   17.30    1.60
   3   2  20   14.90    1.40
  -3  -2 -20   17.70    1.30
  -3  -2 -20   15.50    1.40
  -1  -3  20   55.59    2.70
  -1  -3  20   55.39    2.80
   1   3 -20   57.09    2.90
   0  -2  20  183.48    8.50
   0  -2  20  180.98    8.50
   0   2 -20  178.48    8.40
   0   2 -20  193.68    8.50
   1  -1  20   51.89    2.80
   1  -1  20   53.19    2.90
  -1   1 -20   49.99    2.90
  -1   1 -20   52.29    2.90
   2   0  20   66.49    3.30
  -2   0 -20   64.99    3.40
  -2   0 -20   60.59    3.40
   3   1  20  378.86   17.10
  -3  -1 -20  377.26   17.00
  -3  -1 -20  374.96   17.00
   4   2  20   12.70    1.20
  -4  -2 -20   12.60    1.20
  -4  -2 -20   11.40    1.20
   0  -3  20   11.30    1.10
   0   3 -20    8.50    0.80
   0   3 -20    7.80    0.70
   1  -2  20    3.10    0.80
   1  -2  20    1.90    0.70
  -1   2 -20    1.10    0.80
  -1   2 -20    2.50    0.70
   2  -1  20   18.80    1.60
   2  -1  20   15.90    1.30
  -2   1 -20   18.60    1.60
  -2   1 -20   14.10    1.50
   3   0  20    1.50    0.80
  -3   0 -20   -0.70    0.70
  -3   0 -20    0.40    0.80
   4   1  20  103.79    5.00
  -4  -1 -20  102.49    5.00
   5   2  20   11.10    1.10
  -5  -2 -20   12.90    1.10
   1  -3  20  173.58    7.80
  -1   3 -20  168.78    7.80
  -1   3 -20  171.28    7.80
   2  -2  20   63.49    3.40
  -2   2 -20   63.59    3.30
  -2   2 -20   62.89    3.40
   3  -1  20  416.26   18.80
  -3   1 -20  421.36   18.80
   4   0  20   66.29    3.50
   5   1  20  266.17   12.00
   5   1  20  269.77   12.00
  -5  -1 -20  257.67   12.00
   2  -3  20   72.29    3.50
  -2   3 -20   72.29    3.50
   3  -2  20   18.10    1.40
  -3   2 -20   18.10    1.60
   4  -1  20  108.79    5.30
  -4   1 -20  112.59    5.30
   5   0  20    0.00    0.60
  -5   0 -20   -0.20    0.70
   6   1  20   34.80    2.00
   6   1  20   35.40    2.00
  -6  -1 -20   37.00    2.00
   3  -3  20   18.60    1.20
  -3   3 -20   17.90    1.20
   4  -2  20   12.40    1.20
  -4   2 -20   13.10    1.30
   5  -1  20  277.57   12.60
  -5   1 -20  281.47   12.60
   6   0  20   17.20    1.30
  -6   0 -20   18.40    1.50
   7   1  20    8.00    0.80
   7   1  20    8.90    0.80
  -7  -1 -20    8.90    0.90
   5  -2  20   11.50    1.00
  -5   2 -20   11.80    1.20
   6  -1  20   38.20    2.20
  -6   1 -20   36.30    2.10
   7   0  20    0.20    0.50
   7   0  20    0.10    0.30
  -7   0 -20   -0.40    0.50
   7  -1  20   10.00    0.90
  -7   1 -20    9.20    0.90
   8  -1 -21    8.30    0.80
  -8   0  21    0.30    0.30
   8   0 -21   -0.10    0.40
   8   0 -21    0.60    0.50
  -7   1  21    1.80    0.50
   7  -1 -21    1.30    0.50
   7  -1 -21    1.60    0.50
  -6   2  21    7.70    0.80
   6  -2 -21    7.30    0.60
   6  -2 -21    6.80    0.70
  -8  -1  21    9.40    0.70
   8   1 -21    9.20    0.80
  -7   0  21  117.49    5.50
   7   0 -21  115.19    5.40
   7   0 -21  121.49    5.40
  -6   1  21   50.79    2.70
   6  -1 -21   51.09    2.50
   6  -1 -21   51.19    2.50
   5  -2 -21  150.08    6.80
  -7  -1  21    2.10    0.60
   7   1 -21    1.40    0.50
  -6   0  21   -0.10    0.60
   6   0 -21    0.00    0.50
   6   0 -21   -0.10    0.60
  -5   1  21    8.70    1.10
   5  -1 -21    9.90    1.00
   5  -1 -21   13.30    1.00
  -4   2  21    1.10    0.60
   4  -2 -21    0.50    0.50
   4  -2 -21    0.30    0.50
   4  -2 -21    0.50    0.50
  -3   3  21   17.40    1.20
   3  -3 -21   18.30    1.00
   3  -3 -21   16.80    1.20
  -6  -1  21   54.99    2.80
   6   1 -21   54.09    2.70
   6   1 -21   52.89    2.60
  -5   0  21  394.46   17.70
   5   0 -21  389.76   17.60
  -4   1  21  147.19    6.80
   4  -1 -21  141.49    6.70
   4  -1 -21  147.79    6.70
  -3   2  21  110.89    5.20
   3  -2 -21  105.79    5.00
   3  -2 -21  104.29    4.90
  -2   3  21  190.88    8.70
   2  -3 -21  193.48    8.70
  -6  -2  21    8.60    0.80
   6   2 -21    8.60    0.80
   6   2 -21    8.00    0.70
  -5  -1  21   12.70    1.40
   5   1 -21   11.80    1.30
  -4   0  21    0.10    0.70
   4   0 -21    0.40    0.60
  -3   1  21   24.00    1.80
   3  -1 -21   22.10    1.60
  -2   2  21   50.39    2.80
   2  -2 -21   50.59    2.70
  -1   3  21    0.90    0.50
   1  -3 -21    0.90    0.50
  -5  -2  21  169.18    7.80
   5   2 -21  172.28    7.70
  -4  -1  21  161.18    7.60
   4   1 -21  163.28    7.50
  -3   0  21  623.14   27.30
   3   0 -21  598.14   27.20
  -2   1  21   59.59    3.20
   2  -1 -21   59.59    3.10
  -1   2  21  112.09    5.30
   1  -2 -21  107.19    5.20
   0   3  21    9.20    0.90
   0  -3 -21    8.80    0.90
  -4  -2  21    0.50    0.60
   4   2 -21    0.40    0.60
  -3  -1  21   26.10    1.80
   3   1 -21   24.40    1.80
  -2   0  21   -0.60    0.70
   2   0 -21   -0.40    0.70
  -1   1  21  356.16   16.00
   1  -1 -21  351.86   16.00
   0   2  21   33.80    2.10
   0   2  21   35.80    2.50
   0  -2 -21   34.90    2.10
   1   3  21    7.60    0.70
   1   3  21    8.20    0.90
  -1  -3 -21    9.90    0.90
  -3  -2  21  119.59    5.80
   3   2 -21  125.89    5.80
  -2  -1  21   64.09    3.50
   2   1 -21   69.29    3.50
  -1   0  21   92.59    4.60
   1   0 -21   92.29    4.60
   0   1  21    8.60    1.00
   0   1  21    6.60    1.00
   0  -1 -21    5.30    0.90
   1   2  21  150.18    6.90
   1   2  21  145.49    6.90
  -1  -2 -21  144.79    6.90
  -3  -3  21   22.60    1.30
   3   3 -21   22.60    1.40
  -2  -2  21   57.29    3.00
   2   2 -21   58.39    3.20
  -1  -1  21  393.16   17.60
  -1  -1  21  380.86   17.60
   1   1 -21  398.16   17.60
   0   0  21    0.20    0.70
   0   0  21   -0.80    0.60
   0   0 -21    0.50    0.70
   0   0 -21    0.60    0.70
   1   1  21   17.00    1.50
   1   1  21   17.00    1.60
  -1  -1 -21   15.00    1.60
  -1  -1 -21   14.80    1.40
   2   2  21   51.39    2.70
   2   2  21   49.10    2.60
  -2  -2 -21   46.70    2.60
  -2  -2 -21   51.49    2.70
  -2  -3  21  208.78    9.80
  -2  -3  21  217.78    9.80
   2   3 -21  226.48    9.80
  -1  -2  21  116.89    5.40
  -1  -2  21  114.59    5.70
   1   2 -21  112.59    5.70
   0  -1  21    8.10    1.00
   0  -1  21    8.40    1.00
   0   1 -21    5.60    0.90
   0   1 -21    8.40    1.00
   1   0  21   19.60    1.70
   1   0  21   18.80    1.60
  -1   0 -21   20.70    1.70
  -1   0 -21   21.40    1.70
   2   1  21   30.30    2.40
   2   1  21   33.60    2.20
  -2  -1 -21   33.30    2.00
  -2  -1 -21   33.20    2.10
   3   2  21   38.20    2.10
  -3  -2 -21   37.40    2.10
  -3  -2 -21   36.40    2.20
  -1  -3  21    1.30    0.40
  -1  -3  21    1.10    0.50
   1   3 -21    1.00    0.50
   0  -2  21   34.80    2.10
   0  -2  21   37.20    2.20
   0   2 -21   39.40    2.20
   0   2 -21   36.60    2.10
   1  -1  21   16.50    1.40
   1  -1  21   17.80    1.60
  -1   1 -21   17.20    1.60
  -1   1 -21   15.60    1.60
   2   0  21    0.80    0.70
   2   0  21    0.10    0.60
  -2   0 -21   -0.40    0.80
  -2   0 -21   -1.10    0.60
   3   1  21    9.50    1.00
  -3  -1 -21   11.70    1.10
  -3  -1 -21    9.40    1.00
   4   2  21    1.40    0.50
  -4  -2 -21    2.40    0.60
  -4  -2 -21    1.70    0.50
   0  -3  21    7.40    0.70
   0   3 -21    9.10    0.90
   0   3 -21    6.70    0.70
   1  -2  21  158.98    7.40
  -1   2 -21  160.68    7.40
  -1   2 -21  159.58    7.40
   2  -1  21   38.00    2.30
  -2   1 -21   38.40    2.30
  -2   1 -21   35.70    2.30
   3   0  21  371.06   16.70
  -3   0 -21  375.66   16.60
  -3   0 -21  359.46   16.70
   4   1  21    5.50    0.80
  -4  -1 -21    8.30    0.90
   5   2  21    5.20    0.60
  -5  -2 -21    4.30    0.60
   1  -3  21   12.50    1.00
  -1   3 -21   11.70    0.90
  -1   3 -21   11.10    1.00
   2  -2  21   54.09    2.80
  -2   2 -21   52.19    2.80
  -2   2 -21   56.69    2.80
   3  -1  21   10.70    1.40
  -3   1 -21   10.80    1.60
   4   0  21    0.10    0.60
  -4   0 -21    0.10    0.70
   5   1  21    0.30    0.50
  -5  -1 -21    0.90    0.60
   3  -2  21   39.80    2.20
  -3   2 -21   39.20    2.20
   4  -1  21    7.70    0.90
  -4   1 -21    7.60    1.00
   5   0  21  353.76   16.10
  -5   0 -21  365.66   16.20
   6   1  21    6.50    0.70
   6   1  21    8.80    0.90
  -6  -1 -21    9.40    1.00
   4  -2  21    2.50    0.50
  -4   2 -21    2.40    0.70
   5  -1  21    0.70    0.50
  -5   1 -21    0.90    0.70
   6   0  21    0.10    0.50
   6   0  21    0.00    0.50
  -6   0 -21    0.30    0.60
   5  -2  21    5.50    0.50
   5  -2  21    5.70    0.50
  -5   2 -21    6.40    0.70
   6  -1  21    9.70    0.90
   6  -1  21    9.40    0.80
  -6   1 -21    7.80    0.80
  -7   1  22   59.89    2.80
   7  -1 -22   55.69    2.70
   7  -1 -22   60.79    2.70
   7   0 -22    1.00    0.50
   7   0 -22    0.70    0.40
  -6   1  22   -0.60    0.50
   6  -1 -22    0.10    0.40
  -5   2  22   14.00    1.10
   5  -2 -22   12.20    1.00
  -7  -1  22   62.39    2.90
   7   1 -22   58.29    2.80
  -6   0  22   64.59    3.30
   6   0 -22   64.39    3.00
   6   0 -22   68.49    3.40
  -5   1  22  100.29    4.80
   5  -1 -22   98.39    4.50
   5  -1 -22   98.89    4.60
  -4   2  22  165.28    7.90
   4  -2 -22  161.78    7.40
   4  -2 -22  166.58    7.40
  -6  -1  22    0.40    0.90
   6   1 -22    0.10    0.40
  -5   0  22    0.30    0.60
   5   0 -22   -0.50    0.50
  -4   1  22    1.00    0.70
   4  -1 -22    1.40    0.60
  -3   2  22    2.70    0.70
   3  -2 -22    2.20    0.60
  -5  -1  22  108.19    5.20
   5   1 -22  109.49    5.10
   4   0 -22   25.70    2.20
  -2   2  22   11.80    1.10
   2  -2 -22   12.40    1.20
  -5  -2  22   14.00    1.10
   5   2 -22   15.60    1.10
  -4  -1  22    0.90    0.80
   4   1 -22    1.00    0.70
  -3   0  22    1.00    0.70
   3   0 -22   -0.20    0.70
  -2   1  22    3.30    0.80
   2  -1 -22    3.30    0.80
  -1   2  22    6.20    0.80
   1  -2 -22    7.00    0.80
  -4  -2  22  180.28    8.30
   4   2 -22  185.68    8.30
  -3  -1  22   67.79    4.10
   3   1 -22   69.09    3.60
  -2   0  22  100.29    4.80
   2   0 -22   95.79    4.80
  -1   1  22  149.49    6.90
   1  -1 -22  143.59    6.90
   0   2  22   49.30    2.60
   0  -2 -22   46.30    2.60
  -3  -2  22    2.50    0.60
   3   2 -22    2.70    0.70
  -2  -1  22    4.20    0.80
   2   1 -22    4.00    0.80
  -1   0  22    0.90    0.70
   1   0 -22   -0.70    0.70
   0   1  22   97.59    4.70
   0   1  22   94.29    4.70
   0  -1 -22   93.39    4.70
   1   2  22   18.90    1.40
   1   2  22   18.90    1.40
  -1  -2 -22   21.10    1.50
  -2  -2  22   13.90    1.20
  -2  -2  22   12.50    1.20
   2   2 -22   14.70    1.30
  -1  -1  22  156.78    7.50
  -1  -1  22  159.48    7.60
   1   1 -22  164.88    7.50
   0   0  22  600.24   26.30
   0   0  22  606.94   26.30
   0   0 -22  592.44   26.30
   0   0 -22  549.74   26.50
   1   1  22  112.99    5.40
   1   1  22  117.59    5.40
  -1  -1 -22  108.89    5.40
  -1  -1 -22  110.79    5.30
   2   2  22  101.89    4.60
   2   2  22   93.69    4.40
  -2  -2 -22   99.99    4.60
  -2  -2 -22   88.19    4.60
  -1  -2  22    4.30    0.90
  -1  -2  22    7.60    0.80
   1   2 -22    6.90    0.80
   0  -1  22  104.69    5.00
   0  -1  22  100.69    5.40
   0   1 -22  103.19    5.00
   0   1 -22   98.79    5.20
   1   0  22    0.20    0.70
   1   0  22    0.80    0.70
  -1   0 -22   -0.90    0.70
  -1   0 -22   -0.40    0.60
   2   1  22   15.90    1.30
   2   1  22   17.30    1.50
  -2  -1 -22   16.50    1.50
  -2  -1 -22   18.60    1.40
   3   2  22    5.90    0.70
  -3  -2 -22    6.00    0.70
  -3  -2 -22    5.90    0.70
   0  -2  22   51.29    2.70
   0  -2  22   48.20    2.70
   0   2 -22   52.59    2.70
   0   2 -22   50.79    2.60
   1  -1  22  109.69    5.40
   1  -1  22  122.49    5.50
  -1   1 -22  110.59    5.80
  -1   1 -22  117.99    5.80
   2   0  22  185.08    8.80
   2   0  22  201.78    9.00
  -2   0 -22  193.18    8.90
  -2   0 -22  188.98    8.90
   3   1  22   77.59    3.80
  -3  -1 -22   75.29    3.80
  -3  -1 -22   78.59    4.00
   4   2  22   37.20    1.90
  -4  -2 -22   32.80    1.80
  -4  -2 -22   35.30    1.80
   1  -2  22   20.30    1.50
  -1   2 -22   20.90    1.50
  -1   2 -22   19.70    1.70
   2  -1  22   19.40    1.60
  -2   1 -22   19.00    1.50
  -2   1 -22   19.70    1.60
   3   0  22   -0.30    0.60
  -3   0 -22    0.30    0.70
  -3   0 -22   -0.60    0.60
   4   1  22    8.60    0.90
  -4  -1 -22    8.30    0.90
   2  -2  22  108.29    5.10
  -2   2 -22  108.69    5.20
  -2   2 -22  112.69    5.20
   3  -1  22   78.49    4.00
  -3   1 -22   84.19    4.00
   4   0  22  170.78    7.90
  -4   0 -22  170.58    7.90
   5   1  22   20.80    1.40
   5   1  22   22.90    1.30
  -5  -1 -22   19.20    1.40
   3  -2  22    7.40    0.70
  -3   2 -22    6.90    0.80
   4  -1  22   10.60    1.10
  -4   1 -22    8.40    0.90
   5   0  22   -0.10    0.60
  -5   0 -22   -0.30    0.70
   4  -2  22   38.40    2.00
  -4   2 -22   39.70    2.00
   5  -1  22   21.00    1.30
  -5   1 -22   21.10    1.40
   6   0  22    5.70    0.60
   6   0  22    5.20    0.50
  -6   0 -22    6.10    0.60
  -7   0  23   13.90    0.90
  -6   1  23  145.49    6.60
  -6   0  23   -0.20    0.50
  -5   1  23   36.70    2.00
   5  -1 -23   33.50    1.70
  -4   2  23   30.00    1.70
   4  -2 -23   29.70    1.60
  -6  -1  23  152.58    7.00
  -5   0  23  139.29    6.40
   5   0 -23  137.29    6.30
  -4   1  23   25.40    1.70
   4  -1 -23   24.90    1.50
  -3   2  23   19.40    1.40
   3  -2 -23   21.60    1.30
  -5  -1  23   36.10    2.30
   5   1 -23   39.10    2.00
  -4   0  23    0.20    0.60
   4   0 -23   -0.10    0.50
  -3   1  23   46.10    2.50
   3  -1 -23   41.80    2.30
   2  -2 -23   19.90    1.50
  -4  -1  23   27.20    1.70
   4   1 -23   26.10    1.60
  -3   0  23  242.88   11.00
   3   0 -23  225.78   10.80
  -2   1  23   55.59    2.90
   2  -1 -23   50.89    2.80
  -1   2  23   57.19    3.20
   1  -2 -23   50.99    2.70
  -4  -2  23   33.50    1.80
   4   2 -23   34.50    1.80
  -3  -1  23   47.90    2.60
   3   1 -23   49.30    2.60
  -2   0  23    0.40    0.70
   2   0 -23    0.30    0.70
  -1   1  23    0.70    0.70
   1  -1 -23    0.00    0.60
   0   2  23   20.70    1.40
   0  -2 -23   20.60    1.50
  -3  -2  23   24.60    1.50
   3   2 -23   23.70    1.50
  -2  -1  23   56.19    3.10
   2   1 -23   63.39    3.10
  -1   0  23  551.94   25.00
   1   0 -23  563.74   24.90
   0   1  23   79.49    3.90
   0   1  23   78.29    3.90
   0  -1 -23   78.89    3.90
   1   2  23  153.68    7.00
   1   2  23  152.18    7.10
  -1  -2 -23  155.58    7.10
  -2  -2  23   18.50    1.70
  -2  -2  23   24.30    1.50
   2   2 -23   26.40    1.50
  -1  -1  23    0.10    0.60
  -1  -1  23    0.30    0.60
   1   1 -23    0.20    0.70
   0   0  23    0.40    0.60
   0   0  23    0.60    1.10
   0   0 -23   -0.20    0.80
   1   1  23    0.60    0.60
   1   1  23    0.80    0.60
  -1  -1 -23    0.70    0.70
  -1  -1 -23   -0.70    0.60
   2   2  23   20.00    1.30
  -2  -2 -23   19.40    1.30
  -1  -2  23   56.09    2.80
  -1  -2  23   55.29    2.80
   1   2 -23   57.09    2.80
   0  -1  23   81.19    4.00
   0  -1  23   81.09    4.00
   0   1 -23   83.79    4.10
   0   1 -23   82.99    4.20
   1   0  23   17.10    1.40
   1   0  23   18.00    1.50
  -1   0 -23   15.70    1.50
  -1   0 -23   19.90    1.40
   2   1  23   27.40    1.70
   2   1  23   22.80    1.50
  -2  -1 -23   28.90    1.70
  -2  -1 -23   24.80    1.60
   0  -2  23   20.70    1.40
   0  -2  23   18.10    1.40
   0   2 -23   21.90    1.40
   1  -1  23    1.20    0.60
   1  -1  23   -1.60    0.70
  -1   1 -23    0.10    0.60
  -1   1 -23   -0.10    0.60
   2   0  23   -0.10    0.60
  -2   0 -23    0.30    0.60
  -2   0 -23    0.30    0.60
   3   1  23   16.10    1.50
  -3  -1 -23   15.60    1.20
  -3  -1 -23   12.80    1.20
   1  -2  23  170.28    7.90
  -1   2 -23  175.18    7.90
  -1   2 -23  176.68    7.90
   2  -1  23   26.40    1.70
  -2   1 -23   27.20    1.70
  -2   1 -23   26.20    1.70
   3   0  23  283.97   12.70
  -3   0 -23  288.57   12.70
  -3   0 -23  270.87   12.70
   4   1  23   19.80    1.30
   4   1  23   19.50    1.20
  -4  -1 -23   20.40    1.30
   2  -2  23   20.60    1.30
  -2   2 -23   22.20    1.30
  -2   2 -23   21.00    1.30
   3  -1  23   16.90    1.30
  -3   1 -23   16.80    1.60
   4   0  23    0.30    0.60
  -4   0 -23   -0.60    0.50
   4  -1  23   19.90    1.30
  -4   1 -23   21.30    1.40
   5   0  23  263.87   12.20
   5   0  23  279.57   12.30
  -5   0 -23  276.37   12.30
  -6   0  24   33.30    2.00
  -5   1  24  169.78    7.70
  -5   0  24    0.90    0.50
   5   0 -24   -0.10    0.30
  -4   1  24   -0.10    0.50
   4  -1 -24   -0.10    0.40
  -5  -1  24  176.18    7.90
   5   1 -24  173.08    7.80
  -4   0  24    8.40    0.90
   4   0 -24    8.00    0.80
  -3   1  24  127.39    5.90
   3  -1 -24  123.39    5.80
  -2   2  24   33.40    1.80
   2  -2 -24   30.10    1.70
  -4  -1  24    0.20    0.50
   4   1 -24    0.20    0.50
  -3   0  24   -0.50    0.60
   3   0 -24   -0.30    0.60
  -2   1  24    8.50    0.90
   2  -1 -24    7.70    0.80
  -1   2  24   -0.50    0.40
   1  -2 -24    0.50    0.40
  -3  -1  24  138.79    6.40
   3   1 -24  137.99    6.40
  -2   0  24   50.19    2.70
   2   0 -24   49.20    2.60
  -1   1  24  406.76   17.90
   1  -1 -24  389.36   17.80
   0   2  24   43.80    2.20
   0  -2 -24   43.20    2.20
  -2  -1  24    8.20    0.80
   2   1 -24    9.80    0.90
  -1   0  24    0.70    0.60
   1   0 -24   -0.20    0.60
   0   1  24  106.99    5.10
   0   1  24  110.19    5.10
   0  -1 -24  107.79    5.10
  -2  -2  24   32.70    1.90
   2   2 -24   37.50    1.90
  -1  -1  24  404.26   18.50
  -1  -1  24  405.16   18.50
   1   1 -24  434.96   18.60
   0   0  24   23.10    1.60
   0   0  24   25.30    1.60
   0   0 -24   25.70    1.70
   1   1  24   90.49    4.30
   1   1  24   90.59    4.40
  -1  -1 -24   91.19    4.30
  -1  -2  24    0.10    0.30
  -1  -2  24    0.00    0.40
   1   2 -24    0.60    0.50
   0  -1  24  109.39    5.30
   0  -1  24  114.39    5.30
   0   1 -24  118.49    5.40
   1   0  24   -0.40    0.50
  -1   0 -24    0.80    0.60
  -1   0 -24   -0.20    0.50
   2   1  24    0.40    0.50
  -2  -1 -24   -0.70    0.40
  -2  -1 -24    0.30    0.50
   0  -2  24   45.60    2.30
   0   2 -24   46.80    2.40
   1  -1  24   95.79    4.50
  -1   1 -24   96.99    4.50
  -1   1 -24   94.19    4.40
   2   0  24  119.89    5.70
  -2   0 -24  119.89    5.70
  -2   0 -24  123.89    5.60
   3   1  24   17.10    1.00
   3   1  24   17.40    1.20
  -3  -1 -24   16.10    1.10
  -3  -1 -24   15.90    1.10
   2  -1  24    0.10    0.50
  -2   1 -24   -0.30    0.50
  -2   1 -24   -0.50    0.50
   3   0  24    0.40    0.50
  -3   0 -24   -0.20    0.50
  -3   0 -24    0.00    0.40
   3  -1  24   17.00    1.20
  -3   1 -24   17.80    1.20
   4   0  24   25.40    1.40
  -4   0 -24   24.50    1.40
  -4   0  25   -0.30    0.50
   4   0 -25   -0.10    0.40
  -3   1  25   10.80    1.10
   3  -1 -25   12.10    0.90
  -3   0  25   13.70    1.20
   3   0 -25   13.80    1.10
  -2   1  25    8.70    0.80
   2  -1 -25    7.20    0.70
  -3  -1  25   13.40    1.00
   3   1 -25   12.70    1.00
  -2   0  25    0.50    0.50
   2   0 -25    0.50    0.60
  -1   1  25   -0.40    0.50
   1  -1 -25   -0.30    0.50
  -2  -1  25    9.20    1.00
   2   1 -25   10.10    1.00
  -1   0  25   48.80    2.60
   1   0 -25   53.49    2.80
   0   1  25  122.69    5.60
   0   1  25  120.09    5.60
   0  -1 -25  121.29    5.60
  -1  -1  25    0.30    0.40
  -1  -1  25   -0.40    0.40
   1   1 -25    0.60    0.60
   0   0  25    0.40    0.50
   0   0  25    0.10    0.50
   0   0 -25   -0.30    0.60
   1   1  25   61.89    2.90
   1   1  25   53.79    2.80
  -1  -1 -25   61.79    2.90
   0  -1  25  115.29    5.40
   0  -1  25  112.69    5.50
   0   1 -25  126.69    5.50
   1   0  25  145.99    7.20
   1   0  25  167.98    7.30
  -1   0 -25  165.78    7.30
   1  -1  25   62.99    3.00
  -1   1 -25   62.39    3.10
   2   0  25    0.40    0.50
  -2   0 -25    0.20    0.30
  -2   0 -25    0.40    0.50
  -2   0  26   80.09    3.80
   2   0 -26   80.39    3.80
  -1   0  26    0.00    0.50
   1   0 -26    0.00    0.50
   0   0  26    5.80    0.50
   0   0  26    8.20    0.80
   0   0 -26    8.50    0.90
   0   0   0    0.00    0.00

_computing_structure_solution     'SHELXT 2014/5 (Sheldrick, 2014)'
;
_shelx_hkl_checksum                71970
_olex2_submission_special_instructions  'No special instructions were received'
