# Supplementary material
Source: MDPI journal article supplement (https://www.mdpi.com/2624-8549/5/1/2)
Supplement: s1 [file s1 › 3D-Fe-MOF.cif]

data_pgo928b_0m
_audit_creation_date               2022-11-24
_audit_creation_method
;
Olex2 1.5
(compiled 2021.12.09 svn.r5202d8cf for OlexSys, GUI svn.r6439)
;
_shelx_SHELXL_version_number       '2018/3'
_audit_contact_author_address      ?
_audit_contact_author_email        ?
_audit_contact_author_name         ''
_audit_contact_author_phone        ?
_publ_contact_author_id_orcid      ?
_publ_section_references
;
Dolomanov, O.V., Bourhis, L.J., Gildea, R.J, Howard, J.A.K. & Puschmann, H.
 (2009), J. Appl. Cryst. 42, 339-341.

Sheldrick, G.M. (2015). Acta Cryst. A71, 3-8.

Sheldrick, G.M. (2015). Acta Cryst. C71, 3-8.
;
_chemical_name_common              ?
_chemical_name_systematic          ?
_chemical_formula_moiety           'C18 H18 Fe2 N2 O15'
_chemical_formula_sum              'C18 H18 Fe2 N2 O15'
_chemical_formula_weight           614.04
_chemical_melting_point            ?
loop_
  _atom_type_symbol
  _atom_type_description
  _atom_type_scat_dispersion_real
  _atom_type_scat_dispersion_imag
  _atom_type_scat_source
 'C' 'C' 0.0181 0.0091 'International Tables Vol C Tables 4.2.6.8 and 6.1.1.4'
 'H' 'H' 0.0000 0.0000 'International Tables Vol C Tables 4.2.6.8 and 6.1.1.4'
 'Fe' 'Fe' -1.1336 3.1974
 'International Tables Vol C Tables 4.2.6.8 and 6.1.1.4'
 'N' 'N' 0.0311 0.0180 'International Tables Vol C Tables 4.2.6.8 and 6.1.1.4'
 'O' 'O' 0.0492 0.0322 'International Tables Vol C Tables 4.2.6.8 and 6.1.1.4'

_shelx_space_group_comment
;
The symmetry employed for this shelxl refinement is uniquely defined
by the following loop, which should always be used as a source of
symmetry information in preference to the above space-group names.
They are only intended as comments.
;
_space_group_crystal_system        'triclinic'
_space_group_IT_number             2
_space_group_name_H-M_alt          'P -1'
_space_group_name_Hall             '-P 1'
loop_
  _space_group_symop_operation_xyz
 'x, y, z'
 '-x, -y, -z'

_cell_length_a                     9.872(11)
_cell_length_b                     9.893(9)
_cell_length_c                     10.889(13)
_cell_angle_alpha                  77.72(4)
_cell_angle_beta                   84.23(4)
_cell_angle_gamma                  89.29(3)
_cell_volume                       1033.8(19)
_cell_formula_units_Z              2
_cell_measurement_reflns_used      3934
_cell_measurement_temperature      293(2)
_cell_measurement_theta_max        68.159
_cell_measurement_theta_min        4.192
_shelx_estimated_absorpt_T_max     0.839
_shelx_estimated_absorpt_T_min     0.240
_exptl_absorpt_coefficient_mu      12.099
_exptl_absorpt_correction_T_max    0.7531
_exptl_absorpt_correction_T_min    0.5100
_exptl_absorpt_correction_type     multi-scan
_exptl_absorpt_process_details
;
SADABS-2016/2 (Bruker,2016/2) was used for absorption correction.
wR2(int) was 0.1420 before and 0.0754 after correction.
The Ratio of minimum to maximum transmission is 0.6772.
The \l/2 correction factor is Not present.
;
_exptl_absorpt_special_details     ?
_exptl_crystal_colour              yellow
_exptl_crystal_colour_primary      yellow
_exptl_crystal_density_diffrn      1.973
_exptl_crystal_density_meas        ?
_exptl_crystal_density_method      ?
_exptl_crystal_description         needle
_exptl_crystal_F_000               624
_exptl_crystal_size_max            0.165
_exptl_crystal_size_mid            0.015
_exptl_crystal_size_min            0.015
_exptl_transmission_factor_max     ?
_exptl_transmission_factor_min     ?
_diffrn_reflns_av_R_equivalents    0.0653
_diffrn_reflns_av_unetI/netI       0.0860
_diffrn_reflns_Laue_measured_fraction_full  0.968
_diffrn_reflns_Laue_measured_fraction_max  0.968
_diffrn_reflns_limit_h_max         11
_diffrn_reflns_limit_h_min         -11
_diffrn_reflns_limit_k_max         11
_diffrn_reflns_limit_k_min         -11
_diffrn_reflns_limit_l_max         12
_diffrn_reflns_limit_l_min         -12
_diffrn_reflns_number              7679
_diffrn_reflns_point_group_measured_fraction_full  0.968
_diffrn_reflns_point_group_measured_fraction_max  0.968
_diffrn_reflns_theta_full          64.988
_diffrn_reflns_theta_max           64.988
_diffrn_reflns_theta_min           4.176
_diffrn_ambient_temperature        293(2)
_diffrn_detector_area_resol_mean   ?
_diffrn_measured_fraction_theta_full  0.968
_diffrn_measured_fraction_theta_max  0.968
_diffrn_measurement_device_type    'Bruker APEX-II CCD'
_diffrn_measurement_method         '\f and \w scans'
_diffrn_radiation_type             CuK\a
_diffrn_radiation_wavelength       1.54178
_diffrn_source                     ?
_diffrn_source_current             1.1
_diffrn_source_power               0.05500000000000001
_diffrn_source_voltage             50.0
_diffrn_standards_number           0
_reflns_Friedel_coverage           0.000
_reflns_Friedel_fraction_full      .
_reflns_Friedel_fraction_max       .
_reflns_number_gt                  2487
_reflns_number_total               3409
_reflns_special_details
;
 Reflections were merged by SHELXL according to the crystal
 class for the calculation of statistics and refinement.
 
 _reflns_Friedel_fraction is defined as the number of unique
 Friedel pairs measured divided by the number that would be
 possible theoretically, ignoring centric projections and
 systematic absences.
;
_reflns_threshold_expression       'I > 2\s(I)'
_computing_cell_refinement         'SAINT V8.38A (Bruker, 2018)'
_computing_data_collection         ?
_computing_data_reduction          'SAINT V8.38A (Bruker, 2018)'
_computing_molecular_graphics      'Olex2 1.5 (Dolomanov et al., 2009)'
_computing_publication_material    'Olex2 1.5 (Dolomanov et al., 2009)'
_computing_structure_refinement    'SHELXL 2018/3 (Sheldrick, 2015)'
_computing_structure_solution      'SHELXT 2018/2 (Sheldrick, 2018)'
_refine_diff_density_max           1.144
_refine_diff_density_min           -0.948
_refine_diff_density_rms           0.151
_refine_ls_extinction_coef         .
_refine_ls_extinction_method       none
_refine_ls_goodness_of_fit_ref     1.071
_refine_ls_hydrogen_treatment      mixed
_refine_ls_matrix_type             full
_refine_ls_number_parameters       355
_refine_ls_number_reflns           3409
_refine_ls_number_restraints       2
_refine_ls_R_factor_all            0.0907
_refine_ls_R_factor_gt             0.0671
_refine_ls_restrained_S_all        1.071
_refine_ls_shift/su_max            0.000
_refine_ls_shift/su_mean           0.000
_refine_ls_structure_factor_coef   Fsqd
_refine_ls_weighting_details      
 'w=1/[\s^2^(Fo^2^)+(0.1307P)^2^] where P=(Fo^2^+2Fc^2^)/3'
_refine_ls_weighting_scheme        calc
_refine_ls_wR_factor_gt            0.1823
_refine_ls_wR_factor_ref           0.2034
_refine_special_details            ?
_olex2_refinement_description
;
1. Fixed Uiso
 At 1.2 times of:
  All C(H) groups, All N(H) groups
 At 1.5 times of:
  All O(H,H) groups
2. Restrained distances
 Fe2-H13A \\sim Fe2-H13B
 with sigma of 0.02
 Fe2-H11A \\sim Fe2-H11B
 with sigma of 0.02
3.a Free rotating group:
 O11(H11A,H11B), O13(H13A,H13B)
3.b Rotating group:
 O12(H12A,H12B), O14(H14A,H14B), O15(H15A,H15B)
3.c Aromatic/amide H refined with riding coordinates:
 N2(H2), N1(H1), C17(H17), C7(H7), C4(H4)
;
_atom_sites_solution_hydrogens     mixed
_atom_sites_solution_primary       dual
_atom_sites_solution_secondary     ?
loop_
  _atom_site_label
  _atom_site_type_symbol
  _atom_site_fract_x
  _atom_site_fract_y
  _atom_site_fract_z
  _atom_site_U_iso_or_equiv
  _atom_site_adp_type
  _atom_site_occupancy
  _atom_site_site_symmetry_order
  _atom_site_calc_flag
  _atom_site_refinement_flags_posn
  _atom_site_refinement_flags_adp
  _atom_site_refinement_flags_occupancy
  _atom_site_disorder_assembly
  _atom_site_disorder_group
 Fe2 Fe 0.19357(8) 1.03652(9) 0.20957(8) 0.0264(3) Uani 1 1 d D . . . .
 Fe1 Fe 0.69206(8) 0.04760(9) 0.21088(8) 0.0257(3) Uani 1 1 d . . . . .
 O8 O 1.2205(4) 0.1206(4) 0.8523(4) 0.0297(9) Uani 1 1 d . . . . .
 O6 O 1.1238(4) 0.8434(4) 0.8788(4) 0.0292(9) Uani 1 1 d . . . . .
 O7 O 1.3015(4) 0.1440(4) 1.0321(4) 0.0301(10) Uani 1 1 d . . . . .
 O5 O 0.9425(4) 0.7920(4) 0.7896(4) 0.0293(10) Uani 1 1 d . . . . .
 O3 O 0.6062(4) 0.2117(4) 0.2785(4) 0.0321(10) Uani 1 1 d . . . . .
 O2 O 0.5113(4) 0.9372(4) 0.2978(4) 0.0337(10) Uani 1 1 d . . . . .
 O11 O 0.0760(4) 0.9274(5) 0.1110(4) 0.0318(10) Uani 1 1 d G . . . .
 H11A H 0.099929 0.915035 0.037045 0.048 Uiso 1 1 d DG U . . .
 H11B H -0.010432 0.929114 0.116124 0.048 Uiso 1 1 d DG U . . .
 O12 O 0.0791(4) 0.9273(4) 0.3777(4) 0.0364(10) Uani 1 1 d . . . . .
 H12A H 0.080777 0.841046 0.378902 0.055 Uiso 1 1 d R U . . .
 H12B H -0.004391 0.948598 0.375304 0.055 Uiso 1 1 d R U . . .
 O1 O 0.3313(4) 0.8689(4) 0.2163(4) 0.0322(10) Uani 1 1 d . . . . .
 O14 O 0.5911(4) 0.1311(5) 0.0452(4) 0.0363(10) Uani 1 1 d . . . . .
 H14A H 0.505404 0.128393 0.065056 0.054 Uiso 1 1 d R U . . .
 H14B H 0.603927 0.078387 -0.007325 0.054 Uiso 1 1 d R U . . .
 O4 O 0.7429(4) 0.2468(4) 0.4207(4) 0.0377(11) Uani 1 1 d . . . . .
 O10 O 0.7795(4) 0.6889(4) 0.5525(4) 0.0359(11) Uani 1 1 d . . . . .
 O15 O 0.7975(4) -0.0093(4) 0.3850(4) 0.0340(10) Uani 1 1 d . . . . .
 H15A H 0.793186 0.057578 0.423015 0.051 Uiso 1 1 d R U . . .
 H15B H 0.754190 -0.074963 0.436563 0.051 Uiso 1 1 d R U . . .
 O9 O 0.9345(4) 0.3654(4) 0.6188(4) 0.0355(11) Uani 1 1 d . . . . .
 O13 O 0.3150(4) 1.1301(5) 0.3137(6) 0.0482(13) Uani 1 1 d G . . . .
 H13A H 0.319514 1.217907 0.296468 0.072 Uiso 1 1 d DG U . . .
 H13B H 0.397263 1.104342 0.316501 0.072 Uiso 1 1 d DG U . . .
 N2 N 0.9527(4) 0.5537(5) 0.7098(4) 0.0270(12) Uani 1 1 d . . . . .
 H2 H 0.920156 0.635335 0.706530 0.032 Uiso 1 1 calc R U . . .
 N1 N 0.7449(5) 0.4920(5) 0.4782(4) 0.0279(12) Uani 1 1 d . . . . .
 H1 H 0.773581 0.408542 0.485490 0.033 Uiso 1 1 calc R U . . .
 C13 C 1.0520(5) 0.7589(5) 0.8415(5) 0.0218(12) Uani 1 1 d . . . . .
 C18 C 1.2412(5) 0.1892(6) 0.9331(6) 0.0242(12) Uani 1 1 d . . . . .
 C11 C 1.0493(5) 0.5124(6) 0.7980(5) 0.0228(12) Uani 1 1 d . . . . .
 C17 C 1.0988(6) 0.3786(6) 0.8211(6) 0.0282(13) Uani 1 1 d . . . . .
 H17 H 1.070714 0.315879 0.775958 0.034 Uiso 1 1 calc R U . . .
 C6 C 0.6440(5) 0.5301(6) 0.3941(5) 0.0232(12) Uani 1 1 d . . . . .
 C8 C 0.6532(5) 0.2870(6) 0.3462(6) 0.0274(13) Uani 1 1 d . . . . .
 C16 C 1.1905(5) 0.3368(6) 0.9113(5) 0.0249(12) Uani 1 1 d . . . . .
 C15 C 1.2357(6) 0.4310(6) 0.9771(5) 0.0257(13) Uani 1 1 d . . . . .
 C12 C 1.0957(5) 0.6092(6) 0.8621(5) 0.0248(12) Uani 1 1 d . . . . .
 C7 C 0.5930(6) 0.6645(6) 0.3715(5) 0.0253(13) Uani 1 1 d . . . . .
 H7 H 0.625828 0.730168 0.411067 0.030 Uiso 1 1 calc R U . . .
 C14 C 1.1905(6) 0.5675(6) 0.9504(6) 0.0259(13) Uani 1 1 d . . . . .
 C2 C 0.4921(5) 0.6998(6) 0.2887(6) 0.0266(13) Uani 1 1 d . . . . .
 C10 C 0.9048(6) 0.4829(6) 0.6303(6) 0.0276(13) Uani 1 1 d . . . . .
 C3 C 0.4434(6) 0.6015(6) 0.2278(6) 0.0297(14) Uani 1 1 d . . . . .
 C1 C 0.4425(6) 0.8469(6) 0.2657(5) 0.0251(13) Uani 1 1 d . . . . .
 C4 C 0.4971(6) 0.4701(7) 0.2499(6) 0.0301(14) Uani 1 1 d . . . . .
 H4 H 0.466005 0.405386 0.208327 0.036 Uiso 1 1 calc R U . . .
 C9 C 0.8016(6) 0.5667(6) 0.5474(6) 0.0293(14) Uani 1 1 d . . . . .
 C5 C 0.5970(5) 0.4313(6) 0.3331(5) 0.0253(13) Uani 1 1 d . . . . .
 H3 H 0.365(7) 0.619(7) 0.176(6) 0.030(17) Uiso 1 1 d . . . . .
 H15 H 1.290(7) 0.414(8) 1.049(7) 0.040(19) Uiso 1 1 d . . . . .
 H14 H 1.226(10) 0.631(12) 0.989(10) 0.09(4) Uiso 1 1 d . . . . .

loop_
  _atom_site_aniso_label
  _atom_site_aniso_U_11
  _atom_site_aniso_U_22
  _atom_site_aniso_U_33
  _atom_site_aniso_U_23
  _atom_site_aniso_U_13
  _atom_site_aniso_U_12
 Fe2 0.0257(5) 0.0215(5) 0.0319(6) -0.0015(4) -0.0122(4) 0.0088(4)
 Fe1 0.0240(5) 0.0197(5) 0.0337(6) -0.0032(4) -0.0103(4) 0.0070(4)
 O8 0.034(2) 0.021(2) 0.034(2) -0.0028(18) -0.0123(18) 0.0071(17)
 O6 0.0237(19) 0.027(2) 0.037(2) -0.0061(19) -0.0071(17) 0.0019(16)
 O7 0.028(2) 0.026(2) 0.034(2) 0.0031(18) -0.0119(18) 0.0072(16)
 O5 0.031(2) 0.022(2) 0.036(2) -0.0034(18) -0.0140(18) 0.0088(16)
 O3 0.031(2) 0.026(2) 0.042(2) -0.0076(19) -0.0162(19) 0.0084(17)
 O2 0.028(2) 0.023(2) 0.052(3) -0.007(2) -0.0137(19) 0.0014(17)
 O11 0.029(2) 0.033(2) 0.036(2) -0.0107(19) -0.0091(18) 0.0042(18)
 O12 0.041(2) 0.025(2) 0.040(3) 0.001(2) -0.008(2) 0.0096(18)
 O1 0.031(2) 0.027(2) 0.041(2) -0.0065(19) -0.0173(19) 0.0097(17)
 O14 0.032(2) 0.044(3) 0.036(2) -0.009(2) -0.0140(19) 0.0151(19)
 O4 0.049(3) 0.023(2) 0.046(3) -0.007(2) -0.029(2) 0.0133(19)
 O10 0.043(2) 0.025(2) 0.044(3) -0.010(2) -0.021(2) 0.0115(19)
 O15 0.036(2) 0.026(2) 0.038(2) 0.0015(19) -0.0115(19) 0.0035(18)
 O9 0.042(2) 0.023(2) 0.045(3) -0.009(2) -0.022(2) 0.0105(19)
 O13 0.030(2) 0.048(3) 0.077(4) -0.031(3) -0.018(2) 0.013(2)
 N2 0.027(2) 0.019(3) 0.037(3) -0.004(2) -0.013(2) 0.007(2)
 N1 0.034(3) 0.019(3) 0.031(3) -0.001(2) -0.014(2) 0.008(2)
 C13 0.021(3) 0.013(3) 0.028(3) 0.006(2) -0.004(2) 0.004(2)
 C18 0.019(3) 0.013(3) 0.035(3) 0.006(2) 0.000(2) 0.001(2)
 C11 0.023(3) 0.021(3) 0.024(3) 0.001(2) -0.008(2) 0.006(2)
 C17 0.033(3) 0.023(3) 0.031(3) -0.007(3) -0.010(3) 0.006(2)
 C6 0.023(3) 0.016(3) 0.027(3) 0.005(2) -0.008(2) 0.001(2)
 C8 0.023(3) 0.027(3) 0.029(3) 0.002(3) -0.004(2) 0.003(2)
 C16 0.023(3) 0.021(3) 0.027(3) 0.004(2) -0.006(2) 0.008(2)
 C15 0.028(3) 0.019(3) 0.028(3) 0.004(2) -0.012(2) 0.007(2)
 C12 0.020(3) 0.021(3) 0.030(3) 0.001(2) -0.004(2) 0.008(2)
 C7 0.027(3) 0.025(3) 0.024(3) -0.005(2) -0.007(2) 0.005(2)
 C14 0.021(3) 0.024(3) 0.032(3) -0.002(3) -0.008(2) 0.006(2)
 C2 0.024(3) 0.026(3) 0.029(3) -0.001(3) -0.004(2) 0.010(2)
 C10 0.026(3) 0.026(3) 0.032(3) -0.004(3) -0.011(3) 0.005(2)
 C3 0.025(3) 0.028(3) 0.038(3) -0.006(3) -0.016(3) 0.012(2)
 C1 0.027(3) 0.022(3) 0.023(3) 0.003(2) -0.005(2) 0.012(2)
 C4 0.028(3) 0.029(3) 0.034(3) -0.008(3) -0.009(3) 0.002(2)
 C9 0.025(3) 0.033(4) 0.030(3) -0.005(3) -0.010(3) 0.008(2)
 C5 0.021(3) 0.022(3) 0.030(3) 0.004(2) -0.005(2) 0.006(2)

_geom_special_details
;
 All esds (except the esd in the dihedral angle between two l.s. planes)
 are estimated using the full covariance matrix.  The cell esds are taken
 into account individually in the estimation of esds in distances, angles
 and torsion angles; correlations between esds in cell parameters are only
 used when they are defined by crystal symmetry.  An approximate (isotropic)
 treatment of cell esds is used for estimating esds involving l.s. planes.
;
loop_
  _geom_bond_atom_site_label_1
  _geom_bond_atom_site_label_2
  _geom_bond_distance
  _geom_bond_site_symmetry_2
  _geom_bond_publ_flag
 Fe2 O7 2.177(5) 1_464 ?
 Fe2 O5 2.152(4) 2_676 ?
 Fe2 O11 2.107(4) . ?
 Fe2 O12 2.137(5) . ?
 Fe2 O1 2.125(4) . ?
 Fe2 O13 2.080(5) . ?
 Fe1 O8 2.079(4) 2_756 ?
 Fe1 O6 2.159(5) 2_766 ?
 Fe1 O3 2.060(4) . ?
 Fe1 O2 2.131(5) 1_545 ?
 Fe1 O14 2.153(4) . ?
 Fe1 O15 2.219(4) . ?
 O8 C18 1.253(7) . ?
 O6 C13 1.259(7) . ?
 O7 C18 1.278(7) . ?
 O5 C13 1.278(6) . ?
 O3 C8 1.275(7) . ?
 O2 C1 1.256(7) . ?
 O11 H11A 0.8500 . ?
 O11 H11B 0.8499 . ?
 O12 H12A 0.8501 . ?
 O12 H12B 0.8501 . ?
 O1 C1 1.267(7) . ?
 O14 H14A 0.8512 . ?
 O14 H14B 0.8521 . ?
 O4 C8 1.265(7) . ?
 O10 C9 1.238(7) . ?
 O15 H15A 0.8502 . ?
 O15 H15B 0.8506 . ?
 O9 C10 1.225(7) . ?
 O13 H13A 0.8498 . ?
 O13 H13B 0.8499 . ?
 N2 H2 0.8600 . ?
 N2 C11 1.417(6) . ?
 N2 C10 1.346(7) . ?
 N1 H1 0.8600 . ?
 N1 C6 1.414(7) . ?
 N1 C9 1.326(7) . ?
 C13 C12 1.514(8) . ?
 C18 C16 1.516(8) . ?
 C11 C17 1.386(8) . ?
 C11 C12 1.405(8) . ?
 C17 H17 0.9300 . ?
 C17 C16 1.397(8) . ?
 C6 C7 1.397(8) . ?
 C6 C5 1.401(8) . ?
 C8 C5 1.509(8) . ?
 C16 C15 1.393(9) . ?
 C15 C14 1.397(8) . ?
 C15 H15 0.98(8) . ?
 C12 C14 1.405(8) . ?
 C7 H7 0.9300 . ?
 C7 C2 1.402(8) . ?
 C14 H14 0.91(11) . ?
 C2 C3 1.402(9) . ?
 C2 C1 1.508(8) . ?
 C10 C9 1.545(7) . ?
 C3 C4 1.380(9) . ?
 C3 H3 0.99(7) . ?
 C4 H4 0.9300 . ?
 C4 C5 1.401(8) . ?

loop_
  _geom_angle_atom_site_label_1
  _geom_angle_atom_site_label_2
  _geom_angle_atom_site_label_3
  _geom_angle
  _geom_angle_site_symmetry_1
  _geom_angle_site_symmetry_3
  _geom_angle_publ_flag
 O5 Fe2 O7 90.89(17) 2_676 1_464 ?
 O11 Fe2 O7 90.34(18) . 1_464 ?
 O11 Fe2 O5 96.79(17) . 2_676 ?
 O11 Fe2 O12 86.44(19) . . ?
 O11 Fe2 O1 85.57(17) . . ?
 O12 Fe2 O7 176.69(15) . 1_464 ?
 O12 Fe2 O5 88.69(17) . 2_676 ?
 O1 Fe2 O7 90.25(17) . 1_464 ?
 O1 Fe2 O5 177.38(14) . 2_676 ?
 O1 Fe2 O12 90.31(18) . . ?
 O13 Fe2 O7 91.8(2) . 1_464 ?
 O13 Fe2 O5 86.92(18) . 2_676 ?
 O13 Fe2 O11 175.71(18) . . ?
 O13 Fe2 O12 91.5(2) . . ?
 O13 Fe2 O1 90.68(18) . . ?
 O8 Fe1 O6 84.91(17) 2_756 2_766 ?
 O8 Fe1 O2 94.12(18) 2_756 1_545 ?
 O8 Fe1 O14 96.87(17) 2_756 . ?
 O8 Fe1 O15 89.91(17) 2_756 . ?
 O6 Fe1 O15 87.24(17) 2_766 . ?
 O3 Fe1 O8 178.40(16) . 2_756 ?
 O3 Fe1 O6 95.61(18) . 2_766 ?
 O3 Fe1 O2 85.36(18) . 1_545 ?
 O3 Fe1 O14 84.65(17) . . ?
 O3 Fe1 O15 88.61(17) . . ?
 O2 Fe1 O6 179.02(15) 1_545 2_766 ?
 O2 Fe1 O14 90.28(18) 1_545 . ?
 O2 Fe1 O15 92.95(17) 1_545 . ?
 O14 Fe1 O6 89.64(18) . 2_766 ?
 O14 Fe1 O15 172.27(17) . . ?
 C18 O8 Fe1 137.0(3) . 2_756 ?
 C13 O6 Fe1 130.0(4) . 2_766 ?
 C18 O7 Fe2 122.5(4) . 1_646 ?
 C13 O5 Fe2 132.2(4) . 2_676 ?
 C8 O3 Fe1 130.5(3) . . ?
 C1 O2 Fe1 131.8(4) . 1_565 ?
 Fe2 O11 H11A 124.0 . . ?
 Fe2 O11 H11B 123.7 . . ?
 H11A O11 H11B 104.5 . . ?
 Fe2 O12 H12A 109.5 . . ?
 Fe2 O12 H12B 109.4 . . ?
 H12A O12 H12B 104.5 . . ?
 C1 O1 Fe2 130.7(4) . . ?
 Fe1 O14 H14A 109.2 . . ?
 Fe1 O14 H14B 109.7 . . ?
 H14A O14 H14B 104.4 . . ?
 Fe1 O15 H15A 109.5 . . ?
 Fe1 O15 H15B 109.5 . . ?
 H15A O15 H15B 104.5 . . ?
 Fe2 O13 H13A 117.4 . . ?
 Fe2 O13 H13B 117.6 . . ?
 H13A O13 H13B 104.5 . . ?
 C11 N2 H2 115.5 . . ?
 C10 N2 H2 115.5 . . ?
 C10 N2 C11 128.9(5) . . ?
 C6 N1 H1 115.4 . . ?
 C9 N1 H1 115.4 . . ?
 C9 N1 C6 129.2(5) . . ?
 O6 C13 O5 123.5(5) . . ?
 O6 C13 C12 118.4(4) . . ?
 O5 C13 C12 118.1(5) . . ?
 O8 C18 O7 125.0(5) . . ?
 O8 C18 C16 117.3(5) . . ?
 O7 C18 C16 117.8(5) . . ?
 C17 C11 N2 121.0(5) . . ?
 C17 C11 C12 119.8(4) . . ?
 C12 C11 N2 119.2(5) . . ?
 C11 C17 H17 119.6 . . ?
 C11 C17 C16 120.8(5) . . ?
 C16 C17 H17 119.6 . . ?
 C7 C6 N1 120.5(5) . . ?
 C7 C6 C5 120.6(5) . . ?
 C5 C6 N1 119.0(5) . . ?
 O3 C8 C5 116.5(5) . . ?
 O4 C8 O3 123.4(5) . . ?
 O4 C8 C5 120.1(5) . . ?
 C17 C16 C18 118.6(5) . . ?
 C15 C16 C18 121.4(5) . . ?
 C15 C16 C17 120.0(5) . . ?
 C16 C15 C14 119.4(5) . . ?
 C16 C15 H15 129(5) . . ?
 C14 C15 H15 112(5) . . ?
 C11 C12 C13 124.4(4) . . ?
 C11 C12 C14 119.1(5) . . ?
 C14 C12 C13 116.5(5) . . ?
 C6 C7 H7 120.2 . . ?
 C6 C7 C2 119.6(5) . . ?
 C2 C7 H7 120.2 . . ?
 C15 C14 C12 120.8(6) . . ?
 C15 C14 H14 119(7) . . ?
 C12 C14 H14 120(7) . . ?
 C7 C2 C1 117.4(5) . . ?
 C3 C2 C7 120.4(5) . . ?
 C3 C2 C1 122.2(5) . . ?
 O9 C10 N2 127.4(5) . . ?
 O9 C10 C9 120.0(5) . . ?
 N2 C10 C9 112.6(5) . . ?
 C2 C3 H3 123(4) . . ?
 C4 C3 C2 119.0(5) . . ?
 C4 C3 H3 118(4) . . ?
 O2 C1 O1 124.9(5) . . ?
 O2 C1 C2 118.8(4) . . ?
 O1 C1 C2 116.2(5) . . ?
 C3 C4 H4 119.0 . . ?
 C3 C4 C5 121.9(6) . . ?
 C5 C4 H4 119.0 . . ?
 O10 C9 N1 127.9(5) . . ?
 O10 C9 C10 119.7(5) . . ?
 N1 C9 C10 112.3(5) . . ?
 C6 C5 C8 123.7(5) . . ?
 C6 C5 C4 118.5(5) . . ?
 C4 C5 C8 117.7(6) . . ?

loop_
  _geom_torsion_atom_site_label_1
  _geom_torsion_atom_site_label_2
  _geom_torsion_atom_site_label_3
  _geom_torsion_atom_site_label_4
  _geom_torsion
  _geom_torsion_site_symmetry_1
  _geom_torsion_site_symmetry_2
  _geom_torsion_site_symmetry_3
  _geom_torsion_site_symmetry_4
  _geom_torsion_publ_flag
 Fe2 O7 C18 O8 -88.1(6) 1_646 . . . ?
 Fe2 O7 C18 C16 91.9(5) 1_646 . . . ?
 Fe2 O5 C13 O6 -20.2(9) 2_676 . . . ?
 Fe2 O5 C13 C12 158.2(4) 2_676 . . . ?
 Fe2 O1 C1 O2 -17.3(9) . . . . ?
 Fe2 O1 C1 C2 161.6(4) . . . . ?
 Fe1 O8 C18 O7 -24.9(9) 2_756 . . . ?
 Fe1 O8 C18 C16 155.2(4) 2_756 . . . ?
 Fe1 O6 C13 O5 -99.3(6) 2_766 . . . ?
 Fe1 O6 C13 C12 82.3(6) 2_766 . . . ?
 Fe1 O3 C8 O4 -25.5(9) . . . . ?
 Fe1 O3 C8 C5 154.0(4) . . . . ?
 Fe1 O2 C1 O1 -102.3(6) 1_565 . . . ?
 Fe1 O2 C1 C2 78.9(6) 1_565 . . . ?
 O8 C18 C16 C17 14.1(8) . . . . ?
 O8 C18 C16 C15 -164.4(5) . . . . ?
 O6 C13 C12 C11 -162.3(6) . . . . ?
 O6 C13 C12 C14 16.8(8) . . . . ?
 O7 C18 C16 C17 -165.8(5) . . . . ?
 O7 C18 C16 C15 15.6(8) . . . . ?
 O5 C13 C12 C11 19.2(9) . . . . ?
 O5 C13 C12 C14 -161.8(5) . . . . ?
 O3 C8 C5 C6 -175.6(5) . . . . ?
 O3 C8 C5 C4 1.0(8) . . . . ?
 O4 C8 C5 C6 3.9(9) . . . . ?
 O4 C8 C5 C4 -179.5(6) . . . . ?
 O9 C10 C9 O10 -174.6(6) . . . . ?
 O9 C10 C9 N1 6.3(9) . . . . ?
 N2 C11 C17 C16 -177.8(5) . . . . ?
 N2 C11 C12 C13 -1.6(9) . . . . ?
 N2 C11 C12 C14 179.4(5) . . . . ?
 N2 C10 C9 O10 5.2(9) . . . . ?
 N2 C10 C9 N1 -173.9(5) . . . . ?
 N1 C6 C7 C2 -179.4(5) . . . . ?
 N1 C6 C5 C8 -3.4(9) . . . . ?
 N1 C6 C5 C4 -179.9(6) . . . . ?
 C13 C12 C14 C15 179.2(5) . . . . ?
 C18 C16 C15 C14 177.4(6) . . . . ?
 C11 N2 C10 O9 0.8(11) . . . . ?
 C11 N2 C10 C9 -179.0(5) . . . . ?
 C11 C17 C16 C18 179.8(5) . . . . ?
 C11 C17 C16 C15 -1.6(10) . . . . ?
 C11 C12 C14 C15 -1.7(9) . . . . ?
 C17 C11 C12 C13 178.1(6) . . . . ?
 C17 C11 C12 C14 -1.0(9) . . . . ?
 C17 C16 C15 C14 -1.1(9) . . . . ?
 C6 N1 C9 O10 -1.0(11) . . . . ?
 C6 N1 C9 C10 178.0(5) . . . . ?
 C6 C7 C2 C3 -0.7(9) . . . . ?
 C6 C7 C2 C1 -178.9(5) . . . . ?
 C16 C15 C14 C12 2.8(9) . . . . ?
 C12 C11 C17 C16 2.6(9) . . . . ?
 C7 C6 C5 C8 176.0(6) . . . . ?
 C7 C6 C5 C4 -0.5(9) . . . . ?
 C7 C2 C3 C4 -0.5(9) . . . . ?
 C7 C2 C1 O2 15.2(8) . . . . ?
 C7 C2 C1 O1 -163.7(5) . . . . ?
 C2 C3 C4 C5 1.2(10) . . . . ?
 C10 N2 C11 C17 -6.5(10) . . . . ?
 C10 N2 C11 C12 173.1(6) . . . . ?
 C3 C2 C1 O2 -163.0(6) . . . . ?
 C3 C2 C1 O1 18.1(8) . . . . ?
 C3 C4 C5 C6 -0.7(10) . . . . ?
 C3 C4 C5 C8 -177.4(6) . . . . ?
 C1 C2 C3 C4 177.7(6) . . . . ?
 C9 N1 C6 C7 2.1(10) . . . . ?
 C9 N1 C6 C5 -178.5(6) . . . . ?
 C5 C6 C7 C2 1.2(9) . . . . ?

_shelx_res_file
;
TITL pgo928b_0m_a.res in P-1
    pgo928b_0m.res
    created by SHELXL-2018/3 at 12:32:48 on 24-Nov-2022
REM Old TITL PGO928B_0m_b.hkl
REM SHELXT solution in P-1: R1 0.157, Rweak 0.006, Alpha 0.042
REM <I/s> 0.000 for 0 systematic absences, Orientation as input
REM Formula found by SHELXT: C21 Fe2 N4 O10
CELL 1.54178 9.8718 9.8928 10.889 77.718 84.228 89.293
ZERR 2 0.0109 0.0092 0.0126 0.036 0.037 0.03
LATT 1
SFAC C H Fe N O
UNIT 36 36 4 4 30
SADI Fe2 H13a Fe2 H13b
SADI Fe2 H11a Fe2 H11b

L.S. 10
PLAN  30
SIZE 0.015 0.015 0.165
CONF
BOND
list 4
MORE -1
BOND $H
fmap 2
acta
OMIT -4 130
REM <olex2.extras>
REM <HklSrc "%.\\PGO928B_0m.hkl">
REM </olex2.extras>

WGHT    0.130700
FVAR       0.40837
FE2   3    0.193574    1.036521    0.209570    11.00000    0.02572    0.02151 =
         0.03186   -0.00155   -0.01221    0.00883
FE1   3    0.692056    0.047601    0.210883    11.00000    0.02396    0.01971 =
         0.03373   -0.00324   -0.01028    0.00702
O8    5    1.220502    0.120647    0.852261    11.00000    0.03401    0.02081 =
         0.03447   -0.00279   -0.01231    0.00706
O6    5    1.123845    0.843436    0.878797    11.00000    0.02368    0.02748 =
         0.03708   -0.00615   -0.00714    0.00187
O7    5    1.301453    0.144013    1.032050    11.00000    0.02754    0.02637 =
         0.03376    0.00314   -0.01194    0.00725
O5    5    0.942468    0.791974    0.789572    11.00000    0.03113    0.02156 =
         0.03593   -0.00341   -0.01402    0.00882
O3    5    0.606218    0.211657    0.278541    11.00000    0.03062    0.02638 =
         0.04186   -0.00757   -0.01618    0.00838
O2    5    0.511325    0.937207    0.297842    11.00000    0.02814    0.02305 =
         0.05159   -0.00712   -0.01367    0.00140
AFIX   6
O11   5    0.076028    0.927362    0.111036    11.00000    0.02894    0.03325 =
         0.03591   -0.01072   -0.00909    0.00418
H11A  2    0.099929    0.915035    0.037045    11.00000   -1.50000
H11B  2   -0.010432    0.929114    0.116124    11.00000   -1.50000
AFIX   0
O12   5    0.079129    0.927266    0.377653    11.00000    0.04139    0.02496 =
         0.03977    0.00101   -0.00804    0.00960
AFIX   7
H12A  2    0.080777    0.841046    0.378902    11.00000   -1.50000
H12B  2   -0.004391    0.948598    0.375304    11.00000   -1.50000
AFIX   0
O1    5    0.331305    0.868876    0.216344    11.00000    0.03094    0.02675 =
         0.04124   -0.00646   -0.01728    0.00967
O14   5    0.591115    0.131076    0.045246    11.00000    0.03156    0.04365 =
         0.03577   -0.00880   -0.01397    0.01507
AFIX   7
H14A  2    0.505404    0.128393    0.065056    11.00000   -1.50000
H14B  2    0.603927    0.078387   -0.007325    11.00000   -1.50000
AFIX   0
O4    5    0.742931    0.246750    0.420747    11.00000    0.04915    0.02266 =
         0.04592   -0.00730   -0.02903    0.01329
O10   5    0.779483    0.688892    0.552491    11.00000    0.04332    0.02496 =
         0.04399   -0.01032   -0.02121    0.01148
O15   5    0.797458   -0.009271    0.384994    11.00000    0.03591    0.02612 =
         0.03770    0.00154   -0.01154    0.00353
AFIX   7
H15A  2    0.793186    0.057578    0.423015    11.00000   -1.50000
H15B  2    0.754190   -0.074963    0.436563    11.00000   -1.50000
AFIX   0
O9    5    0.934531    0.365357    0.618773    11.00000    0.04218    0.02337 =
         0.04482   -0.00880   -0.02157    0.01048
AFIX   6
O13   5    0.314961    1.130077    0.313718    11.00000    0.03015    0.04788 =
         0.07687   -0.03089   -0.01827    0.01348
H13A  2    0.319514    1.217907    0.296468    11.00000   -1.50000
H13B  2    0.397263    1.104342    0.316501    11.00000   -1.50000
AFIX   0
N2    4    0.952669    0.553742    0.709760    11.00000    0.02672    0.01882 =
         0.03654   -0.00425   -0.01299    0.00740
AFIX  43
H2    2    0.920156    0.635335    0.706530    11.00000   -1.20000
AFIX   0
N1    4    0.744899    0.492038    0.478185    11.00000    0.03388    0.01901 =
         0.03109   -0.00122   -0.01424    0.00838
AFIX  43
H1    2    0.773581    0.408542    0.485490    11.00000   -1.20000
AFIX   0
C13   1    1.052030    0.758875    0.841528    11.00000    0.02059    0.01269 =
         0.02791    0.00581   -0.00406    0.00387
C18   1    1.241179    0.189188    0.933074    11.00000    0.01912    0.01312 =
         0.03479    0.00648   -0.00037    0.00138
C11   1    1.049275    0.512391    0.797992    11.00000    0.02263    0.02071 =
         0.02353    0.00078   -0.00769    0.00550
C17   1    1.098833    0.378601    0.821082    11.00000    0.03271    0.02302 =
         0.03082   -0.00683   -0.01031    0.00599
AFIX  43
H17   2    1.070714    0.315879    0.775958    11.00000   -1.20000
AFIX   0
C6    1    0.644010    0.530113    0.394124    11.00000    0.02328    0.01627 =
         0.02720    0.00458   -0.00841    0.00124
C8    1    0.653216    0.286998    0.346238    11.00000    0.02259    0.02677 =
         0.02937    0.00234   -0.00411    0.00335
C16   1    1.190524    0.336817    0.911331    11.00000    0.02262    0.02144 =
         0.02716    0.00368   -0.00576    0.00773
C15   1    1.235732    0.430987    0.977143    11.00000    0.02777    0.01912 =
         0.02789    0.00404   -0.01190    0.00740
C12   1    1.095680    0.609169    0.862080    11.00000    0.02045    0.02130 =
         0.02996    0.00106   -0.00400    0.00766
C7    1    0.593039    0.664508    0.371480    11.00000    0.02723    0.02514 =
         0.02424   -0.00527   -0.00699    0.00488
AFIX  43
H7    2    0.625828    0.730168    0.411067    11.00000   -1.20000
AFIX   0
C14   1    1.190517    0.567491    0.950445    11.00000    0.02131    0.02406 =
         0.03172   -0.00246   -0.00799    0.00572
C2    1    0.492106    0.699782    0.288670    11.00000    0.02362    0.02552 =
         0.02890   -0.00126   -0.00438    0.00977
C10   1    0.904769    0.482909    0.630297    11.00000    0.02573    0.02597 =
         0.03184   -0.00385   -0.01132    0.00500
C3    1    0.443421    0.601519    0.227795    11.00000    0.02504    0.02826 =
         0.03766   -0.00574   -0.01563    0.01250
C1    1    0.442493    0.846897    0.265721    11.00000    0.02708    0.02214 =
         0.02301    0.00259   -0.00481    0.01195
C4    1    0.497071    0.470115    0.249883    11.00000    0.02839    0.02916 =
         0.03427   -0.00756   -0.00890    0.00168
AFIX  43
H4    2    0.466005    0.405386    0.208327    11.00000   -1.20000
AFIX   0
C9    1    0.801593    0.566711    0.547359    11.00000    0.02546    0.03268 =
         0.03012   -0.00482   -0.00969    0.00769
C5    1    0.596980    0.431334    0.333082    11.00000    0.02057    0.02160 =
         0.02977    0.00414   -0.00476    0.00585
H3    2    0.365434    0.619179    0.175548    11.00000    0.02994
H15   2    1.290167    0.413699    1.048831    11.00000    0.03987
H14   2    1.225525    0.630813    0.989064    11.00000    0.09252
HKLF 4


REM  pgo928b_0m_a.res in P-1
REM wR2 = 0.2034, GooF = S = 1.071, Restrained GooF = 1.071 for all data
REM R1 = 0.0671 for 2487 Fo > 4sig(Fo) and 0.0907 for all 3409 data
REM 355 parameters refined using 2 restraints

END

WGHT      0.1308      0.0000

REM Highest difference peak  1.144,  deepest hole -0.948,  1-sigma level  0.151
Q1    1   0.5997  0.9948  0.2625  11.00000  0.05    1.14
Q2    1   0.3007  1.1004  0.1608  11.00000  0.05    1.08
Q3    1   0.0915  0.9869  0.2636  11.00000  0.05    1.05
Q4    1   1.1976  0.8881  0.8359  11.00000  0.05    1.04
Q5    1   0.2523  1.0265  0.1376  11.00000  0.05    0.60
Q6    1   0.2079  0.9756  0.1286  11.00000  0.05    0.59
Q7    1   0.8015  0.4842  0.7456  11.00000  0.05    0.54
Q8    1   1.2558  0.7222  0.8959  11.00000  0.05    0.52
Q9    1   1.1929  0.0992  1.0908  11.00000  0.05    0.50
Q10   1   0.8493  0.3191  0.6821  11.00000  0.05    0.48
Q11   1   1.1606  0.0707  0.9169  11.00000  0.05    0.48
Q12   1   0.8776  0.7393  0.5176  11.00000  0.05    0.47
Q13   1   0.6448  0.7985  0.2819  11.00000  0.05    0.46
Q14   1   0.5042  1.0245  0.3346  11.00000  0.05    0.46
Q15   1   0.5487  0.1839  0.3217  11.00000  0.05    0.45
Q16   1   0.3676  1.1629  0.2367  11.00000  0.05    0.44
Q17   1   0.0217  0.9180  0.2102  11.00000  0.05    0.44
Q18   1   1.0245  0.5513  0.6270  11.00000  0.05    0.43
Q19   1   0.4449  0.9428  0.5047  11.00000  0.05    0.43
Q20   1  -0.0630  0.8215  0.4961  11.00000  0.05    0.42
Q21   1   0.4043  1.2594  0.3925  11.00000  0.05    0.42
Q22   1   0.6924  0.2052  0.1742  11.00000  0.05    0.41
Q23   1   1.0991  0.6375  1.0735  11.00000  0.05    0.40
Q24   1   1.1425  0.6391  1.1132  11.00000  0.05    0.40
Q25   1   1.0249  0.3589  0.8794  11.00000  0.05    0.40
Q26   1  -0.1248  0.9945  0.1188  11.00000  0.05    0.39
Q27   1   1.2269  0.2750  1.0919  11.00000  0.05    0.39
Q28   1   0.5442  0.4457  0.0747  11.00000  0.05    0.39
Q29   1   0.8249  0.3715  0.7824  11.00000  0.05    0.39
Q30   1   0.5306  0.8976  0.2146  11.00000  0.05    0.39
;
_shelx_res_checksum                40264
_shelx_hkl_file
;
  -1   0   0   37.40    3.00
  -1   0   0   37.00    3.60
   1   0   0   39.00    3.80
   1   0   0   36.00    3.50
   1   0   0   35.30    3.00
  -2   0   0  687.03   50.99
   2   0   0  661.53   50.99
   2   0   0  748.33   51.49
   2   0   0  649.04   51.19
  -3   0   0    3.00    1.50
   3   0   0    5.10    1.60
   3   0   0    1.70    2.10
   3   0   0    4.10    3.50
   4   0   0   73.19    6.50
   4   0   0   76.79    8.90
   5   0   0   14.60    4.80
   5   0   0   19.00    2.90
   6   0   0   31.20    3.60
  -7   0   0  448.56   35.80
  -7   0   0  434.66   32.70
   7   0   0  403.06   32.80
   7   0   0  417.56   32.50
   7   0   0  470.95   35.20
  -8   0   0  410.76   33.80
   8   0   0  405.66   30.70
   8   0   0  391.66   30.30
   9   0   0    0.90    2.90
   9   0   0    4.50    4.60
  10   0   0  179.68   14.50
  10   0   0  159.28   13.40
  11   0   0   22.00    3.00
  11  -1   0    2.60    2.30
  10  -1   0  142.19   12.50
   9  -1   0    4.40    4.10
   9  -1   0    1.10    2.70
  -9   1   0   -1.80    6.30
   8  -1   0  365.96   28.00
   8  -1   0  370.16   28.40
  -8   1   0  380.06   32.10
   7  -1   0   46.40    5.60
  -7   1   0   47.70    4.20
  -7   1   0   49.90   11.00
   6  -1   0  641.94   52.89
  -6   1   0  721.23   55.99
   5  -1   0   16.00    2.70
   5  -1   0   14.20    5.00
   4  -1   0   74.79    8.70
  -4   1   0   59.09    5.60
   3  -1   0  570.84   45.10
   3  -1   0  641.14   46.10
   2  -1   0  288.37   22.50
   1  -1   0   70.19    6.40
  -1   1   0   60.29    6.30
   0  -1   0  742.83   55.49
   0   1   0  752.82   55.59
  -1  -1   0   55.89    4.50
  -1  -1   0   56.49    4.60
   1   1   0   52.89    4.60
   1   1   0   57.99    4.60
  -2  -1   0 1540.25  112.49
  -2  -1   0 1486.45  112.59
   2   1   0 1436.46  112.59
   2   1   0 1603.34  112.49
  -3  -1   0 1009.30   72.99
   3   1   0  962.40   73.29
   3   1   0  963.90   72.79
  -4  -1   0  114.89   10.00
   4   1   0  107.09    8.90
   4   1   0  105.59   10.40
   5   1   0   68.19    9.00
   5   1   0   69.69    6.00
   5   1   0   74.19    6.80
  -6  -1   0   40.70    8.70
   6   1   0   42.90    4.20
   6   1   0   34.90    6.70
   6   1   0   36.70    4.90
  -7  -1   0    2.10    5.70
  -7  -1   0    3.90    3.30
   7   1   0   -5.80    5.50
   7   1   0    1.90    2.40
   7   1   0   -5.90    3.30
  -8  -1   0  180.88   14.40
   8   1   0  175.18   14.80
   8   1   0  176.08   14.00
   9   1   0   20.80    5.40
   9   1   0   12.50    3.40
  10   1   0  111.79   10.80
  11   1   0   26.80    6.10
  11   1   0   23.50    3.30
  11  -2   0    8.60    2.50
  11  -2   0   12.10    3.70
  10  -2   0   52.49    6.80
  10  -2   0   55.39    5.60
 -10   2   0   38.20   10.70
   9  -2   0    7.00    2.90
   9  -2   0    7.60    4.10
  -9   2   0    3.30    1.70
  -9   2   0    5.10    7.40
   8  -2   0  245.38   20.20
  -8   2   0  283.07   25.00
  -8   2   0  253.57   19.50
   7  -2   0    4.60    5.90
  -7   2   0    2.10    7.70
  -7   2   0    2.10    1.50
   6  -2   0  313.07   24.30
  -6   2   0  254.87   26.40
  -6   2   0  281.17   21.70
   5  -2   0    7.50    4.90
   4  -2   0    3.40    4.40
   3  -2   0  820.62   62.09
   2  -2   0   94.29    9.20
  -2   2   0   85.09    9.10
   1  -2   0   19.10    3.50
  -1   2   0   15.30    3.60
   0  -2   0 1768.22  131.19
  -1  -2   0  221.68   18.00
  -1  -2   0  251.17   18.10
   1   2   0  246.98   18.30
  -2  -2   0  373.46   27.60
  -2  -2   0  345.87   27.50
   2   2   0  382.76   27.60
  -3  -2   0   26.00    3.70
  -3  -2   0   17.70    2.70
   3   2   0   20.70    3.10
   3   2   0   26.30    3.40
  -4  -2   0  192.98   15.20
   4   2   0  181.98   14.60
  -5  -2   0   32.60    5.20
   5   2   0   32.00    4.00
  -6  -2   0   38.00    4.90
  -7  -2   0  115.49   10.60
   7   2   0  122.39   10.40
   7   2   0  139.49   11.40
  -8  -2   0  115.69   10.90
   8   2   0  135.89   12.00
  -9  -2   0    1.60    4.10
   9   2   0   -1.70    4.90
   9   2   0    1.90    3.20
  10   2   0  173.28   14.70
  10   2   0  169.28   13.70
  11   2   0    2.90    3.80
  11   2   0    1.10    2.40
  11  -3   0   51.99    5.20
  11  -3   0   55.59    6.00
  10  -3   0   67.19    7.30
  10  -3   0   66.79    6.20
 -10   3   0   67.29   11.50
   9  -3   0   54.99    7.60
   9  -3   0   63.29    6.00
  -9   3   0   49.30    5.10
  -9   3   0   58.99   13.10
   8  -3   0  143.39   12.10
  -8   3   0  142.39   18.50
  -8   3   0  150.48   11.30
   7  -3   0   21.80    4.10
  -7   3   0   20.90    2.60
  -7   3   0    8.90   10.10
   6  -3   0  546.75   45.30
  -6   3   0  596.84   43.10
  -6   3   0  584.94   48.00
  -6   3   0  567.54   43.40
   5  -3   0   33.70    6.30
   4  -3   0  305.67   25.00
   3  -3   0 1802.52  134.79
   2  -3   0   63.09    7.60
   1  -3   0   84.69    7.70
  -1   3   0   77.39    8.20
   0  -3   0   35.40   23.50
   0   3   0    8.60   33.80
  -1  -3   0   17.40    2.70
   1   3   0   19.40    3.40
  -2  -3   0  205.68   15.60
   2   3   0  196.98   15.70
  -3  -3   0    9.40    2.40
  -4  -3   0  578.84   43.90
  -5  -3   0   62.89    9.20
   5   3   0   67.29    6.30
  -6  -3   0    3.60    3.20
  -6  -3   0   -2.00    5.20
   6   3   0    7.70    3.00
   6   3   0    4.90    4.30
  -7  -3   0   44.00    6.70
   7   3   0   57.39    7.70
   7   3   0   50.29    6.00
  -8  -3   0   55.69    7.00
   8   3   0   67.99    9.00
  -9  -3   0   50.99    6.80
   9   3   0   52.19    8.50
  10   3   0  106.09    9.10
  11   3   0    0.50    1.90
  11  -4   0   27.00    3.20
  11  -4   0   30.30    4.50
  10  -4   0    6.60    2.40
 -10   4   0    4.80    1.30
 -10   4   0    3.20    1.90
 -10   4   0    8.30    6.50
   9  -4   0   64.29    7.10
   9  -4   0   69.59    6.30
  -9   4   0   85.29   14.00
  -9   4   0   65.19    5.50
  -9   4   0   54.99    6.70
   8  -4   0    5.90    3.10
  -8   4   0    5.00    1.70
  -8   4   0   -2.30    8.80
  -7   4   0  128.09   20.10
  -7   4   0  119.99    9.80
   6  -4   0  295.27   25.10
  -6   4   0  301.67   22.60
  -6   4   0  291.07   23.10
   5  -4   0   12.00    5.00
  -5   4   0    8.60    6.60
  -5   4   0   12.00    3.00
  -5   4   0    7.30    2.50
   4  -4   0  786.42  179.78
   3  -4   0    4.80    3.90
   2  -4   0    5.50    3.20
   1  -4   0   28.50    5.10
   1  -4   0   33.10    4.30
   0  -4   0    6.40    2.30
  -1  -4   0   26.60    4.10
  -2  -4   0  306.97   23.50
  -3  -4   0   20.20    3.30
  -4  -4   0 2485.65  205.08
  -4  -4   0 2924.01  204.68
   4   4   0 2836.82  203.88
  -5  -4   0   90.09    9.50
  -5  -4   0  111.09   11.00
  -6  -4   0   12.10    3.70
  -6  -4   0   19.90    6.90
   6   4   0   14.70    3.90
  -7  -4   0    2.40    3.80
   7   4   0    4.70    4.10
  -8  -4   0   -1.70    4.20
   8   4   0    5.10    4.00
  -9  -4   0   25.10    4.10
   9   4   0   16.60    3.90
  10   4   0    4.60    2.60
  11   4   0    4.60    1.70
  10  -5   0    1.20    2.60
  10  -5   0   -1.10    2.00
 -10   5   0   -4.20    5.50
 -10   5   0    0.00    1.00
   9  -5   0   36.90    4.90
  -9   5   0   17.60    9.70
  -9   5   0   25.70    3.10
   8  -5   0   92.49    8.10
  -8   5   0   81.89    8.30
   7  -5   0   25.30    3.70
  -7   5   0   20.30    3.00
  -7   5   0   15.90    2.60
  -7   5   0   25.00   13.80
  -6   5   0   95.89    8.20
  -6   5   0  107.39    8.50
  -6   5   0   91.59    9.00
   5  -5   0   68.59   11.30
  -5   5   0   54.39    6.10
  -5   5   0   62.39    6.40
  -5   5   0   51.99   12.20
   4  -5   0  829.32   73.39
  -4   5   0 1087.09   75.59
  -4   5   0  986.60   72.79
   3  -5   0    1.90    3.70
   2  -5   0  151.08   12.90
   2  -5   0  157.38   13.30
   1  -5   0    6.70    2.70
  -1   5   0    2.30    1.80
   0  -5   0    2.50    2.60
  -1  -5   0  310.77   23.40
   1   5   0  298.47   23.00
  -2  -5   0  296.27   22.30
   2   5   0  279.67   21.80
  -3  -5   0  155.98   13.20
   3   5   0  157.18   12.30
  -4  -5   0  316.67   26.50
  -4  -5   0  392.86   27.40
  -4  -5   0  343.27   27.30
  -5  -5   0  101.49    9.50
  -5  -5   0  121.89   12.30
   5   5   0  110.39    9.40
  -6  -5   0  177.28   14.50
   6   5   0  175.78   14.30
  -7  -5   0    5.50    4.50
   7   5   0   -3.90    4.20
  -8  -5   0   -0.10    4.40
   8   5   0    2.80    3.60
  -9  -5   0   31.50    5.00
   9   5   0   19.40    3.70
 -10  -5   0   14.00    3.10
 -10   6   0    6.80    1.10
 -10   6   0    7.80    4.90
  -9   6   0    2.70    8.60
  -8   6   0    1.40    1.40
  -8   6   0    0.20   11.60
  -7   6   0   -1.50   12.70
  -7   6   0    0.50    1.80
  -6   6   0  154.08   12.60
  -6   6   0  158.78   13.30
  -5   6   0    1.20    2.90
  -5   6   0    2.10    7.50
  -5   6   0    5.70    2.50
   4  -6   0  562.94   45.40
  -4   6   0  577.74   44.80
  -4   6   0  585.64   44.30
  -4   6   0  620.54   47.70
   3  -6   0    3.60    3.30
   3  -6   0    3.90    3.40
  -3   6   0    0.80    2.70
  -3   6   0    4.70    2.70
  -3   6   0    2.70    8.40
   2  -6   0   38.40    5.50
   2  -6   0   41.50    6.20
  -2   6   0   45.80    5.30
   1  -6   0   48.80    5.90
  -1   6   0   49.10   14.10
  -1   6   0   45.00    4.80
  -1   6   0   40.70    4.30
   0  -6   0    4.30    2.90
   0   6   0    6.10    2.10
   0   6   0    5.10    1.90
   0   6   0    1.20   11.60
  -1  -6   0   12.80    3.40
   1   6   0   11.30    2.40
   1   6   0   35.40   13.80
   1   6   0   15.10    2.40
  -2  -6   0  324.17   24.50
   2   6   0  345.27   24.10
   2   6   0  275.27   23.70
  -3  -6   0   62.99    7.50
  -3  -6   0   50.29    5.80
   3   6   0   62.29    5.90
  -4  -6   0  288.47   23.00
  -4  -6   0  274.67   22.00
  -4  -6   0  280.77   23.30
   4   6   0  298.37   22.00
   5   6   0   38.80    5.10
  -6  -6   0   43.30    6.80
  -7  -6   0    4.10    4.10
   7   6   0    4.80    4.10
  -8  -6   0   16.80    4.10
  -9  -6   0    1.80    3.30
   9   6   0    2.50    2.90
 -10  -6   0   12.10    2.40
  10   6   0    6.70    1.90
   9  -7   0   43.70    3.90
  -9   7   0   38.50    3.50
  -9   7   0   40.90    9.80
  -8   7   0    3.70    1.40
  -8   7   0   -0.30    9.40
  -7   7   0   10.00   11.60
  -7   7   0   12.50    2.10
  -5   7   0  245.18   18.10
  -5   7   0  216.48   18.70
  -4   7   0  258.87   25.90
  -4   7   0  293.07   22.60
  -4   7   0  295.07   22.00
   3  -7   0   40.50    6.90
  -3   7   0   25.30   10.10
  -3   7   0   44.10    5.90
  -3   7   0   36.10    4.30
  -2   7   0   15.70   12.20
  -2   7   0   11.00    3.40
  -2   7   0    7.50    2.70
   1  -7   0   -5.30    3.30
  -1   7   0   -2.50    1.90
  -1   7   0    2.80   11.30
  -1   7   0    2.30    2.50
  -1   7   0    2.60    3.40
   0  -7   0   10.20    4.00
   0   7   0   10.00    2.50
   0   7   0    5.30   12.50
   0   7   0   14.90    2.40
   0   7   0    8.80    2.40
  -1  -7   0  241.18   19.10
   1   7   0  216.38   29.80
   1   7   0  252.57   18.10
   1   7   0  226.08   18.10
   2   7   0  340.67   36.00
   2   7   0  301.87   24.00
  -3  -7   0   29.00    4.10
   3   7   0   23.50    3.70
  -4  -7   0  183.98   15.50
   4   7   0  206.58   15.80
  -5  -7   0   26.90    4.70
   5   7   0   19.40    4.60
   6   7   0   67.39    7.90
  -7  -7   0   -1.90    4.20
  -8  -7   0   13.70    3.80
   8   7   0   14.30    3.30
  -9  -7   0   25.00    3.70
   9   7   0   15.60    2.50
  -8   8   0    2.40    1.20
  -8   8   0    2.30    6.40
  -7   8   0    3.00    9.90
  -7   8   0    0.80    1.40
  -6   8   0    1.10   10.30
  -6   8   0   15.20    2.40
  -5   8   0   -0.10    2.90
  -5   8   0    5.60   10.80
  -5   8   0    1.90    2.30
  -4   8   0  146.39   12.90
  -4   8   0  143.39   11.90
  -3   8   0    9.30    3.30
  -3   8   0    4.80    2.50
  -3   8   0   -0.40    8.10
  -2   8   0  167.68   13.40
  -2   8   0  151.28   12.80
  -2   8   0  147.19   21.80
  -2   8   0  151.38   12.40
  -1   8   0   19.20    3.00
  -1   8   0   11.30    2.20
  -1   8   0    7.70   12.90
  -1   8   0    8.00    3.10
   0   8   0   48.20   15.40
   0   8   0   38.20    5.30
   1   8   0   13.30    3.10
   1   8   0    8.10   14.30
   2   8   0   76.09    7.70
   2   8   0   49.99   18.40
  -3  -8   0   57.89    6.90
   3   8   0   65.99    7.80
   3   8   0   65.09   19.90
  -4  -8   0   21.30    4.50
   4   8   0   14.50    3.90
   4   8   0   23.00   20.30
   5   8   0   12.60   20.70
   5   8   0    7.20    3.80
  -6  -8   0  160.88   13.00
   6   8   0  149.79   29.80
   6   8   0  148.69   12.80
  -7  -8   0    6.40    3.80
   7   8   0    6.40   15.00
   7   8   0    5.30    2.90
  -8  -8   0   10.10    2.80
   8   8   0    3.10    2.00
   8   8   0    4.10   10.20
  -7   9   0    0.50    1.10
  -7   9   0   -0.30    7.30
  -6   9   0   -2.20    8.90
  -6   9   0    1.30    1.40
  -5   9   0   48.40    4.70
  -4   9   0   84.29    7.90
  -4   9   0   82.89    7.20
  -3   9   0    3.90    2.60
  -3   9   0   -1.20    7.20
  -2   9   0   16.30   10.50
  -2   9   0   31.20    4.10
  -1   9   0   -1.60    0.90
  -1   9   0    6.60    2.80
  -1   9   0    1.30   10.10
   0   9   0   68.39    6.60
   0   9   0   57.49   16.80
   1   9   0    1.90    2.70
   1   9   0    1.40   13.60
   2   9   0   -2.90   14.70
   2   9   0    3.80    3.10
   3   9   0    5.30   16.60
   3   9   0    7.80    3.30
   4   9   0   37.80   18.30
  -5  -9   0  310.57   22.80
   5   9   0  281.87   22.70
  -6  -9   0   48.90    5.40
   6   9   0   26.70   15.50
   6   9   0   38.70    5.00
  -7  -9   0   14.80    2.80
   7   9   0    4.70   10.30
   7   9   0   11.50    2.00
  -6  10   0   -0.10    6.80
  -6  10   0    0.40    0.80
  -5  10   0   14.40    8.40
  -4  10   0    9.10    1.50
  -4  10   0    7.60    7.80
  -3  10   0   19.90    2.20
  -3  10   0   10.60    7.00
  -2  10   0  171.08   18.80
  -1  10   0   33.80   10.30
   0  10   0  141.69   11.50
   1  10   0   39.70   14.40
   2  10   0   16.90   14.10
   3  10   0   -4.20   12.70
   4  10   0    0.60   12.70
   5  10   0    5.60   11.60
  -4  11   0    4.20    6.30
  -3  11   0    3.80    6.20
  -2  11   0   83.09   10.70
  -1  11   0   71.89    6.30
   0  11   0   61.09   12.20
   1  11   0   -2.30    8.10
   1  11   0    5.00    2.40
   2  11   0    6.10    9.20
   3  11   0    3.20    8.90
   2  11  -1    4.90    7.20
   1  11  -1    3.40    7.00
   0  11  -1   -0.40    6.20
   0  11  -1    5.10    2.60
  -1  11  -1    1.90    5.40
  -2  11  -1   32.50    8.20
  -3  11  -1   17.30    6.60
   5  10  -1    2.00    8.80
   4  10  -1   25.60   12.00
   3  10  -1   -3.50   11.90
   2  10  -1    4.80   12.50
   1  10  -1    7.30   12.20
   0  10  -1    3.60    9.70
   0  10  -1   19.90    3.30
  -1  10  -1    0.00    2.90
  -1  10  -1    2.90    8.20
  -2  10  -1   53.79   11.10
  -3  10  -1    3.00    6.00
  -3  10  -1    1.70    0.80
  -4  10  -1   80.69    6.10
  -4  10  -1   70.49   16.20
  -5  10  -1    1.70    0.80
  -5  10  -1   -2.30    7.20
   7   9  -1    3.70    7.80
  -7  -9   1    0.40    2.60
   6   9  -1    4.90    1.70
   6   9  -1    2.00   10.90
  -6  -9   1    6.60    2.80
   5   9  -1   -1.40   13.70
   4   9  -1  365.76   24.90
   4   9  -1  266.17   36.50
   3   9  -1   -2.20   14.70
   2   9  -1   47.10   17.20
   1   9  -1    3.80   18.70
   0   9  -1   10.10   15.10
   0   9  -1   40.00    5.50
  -1   9  -1    0.50   15.50
  -2   9  -1    8.20    8.80
  -2   9  -1   13.00    1.70
  -3   9  -1   64.09    5.50
  -3   9  -1   69.79   14.90
  -4   9  -1   57.29   12.20
  -4   9  -1   83.89    6.20
  -5   9  -1    9.20    8.50
  -5   9  -1   11.80    1.80
  -6   9  -1  179.18   13.70
  -7   9  -1   24.40    7.90
  -7   9  -1   30.10    2.70
   8   8  -1   -1.50    7.90
  -8  -8   1   11.40    2.50
   7   8  -1    1.70   12.90
  -7  -8   1    1.00    3.50
   6   8  -1   10.90   15.70
   6   8  -1   10.90    3.10
  -6  -8   1   19.30    4.50
   5   8  -1    8.50    3.40
   5   8  -1    5.30   18.30
  -5  -8   1   13.80    4.60
   4   8  -1    6.10   17.60
   4   8  -1   17.20    4.00
   3   8  -1    6.80    3.40
   3   8  -1    2.60   17.40
   2   8  -1  200.18   33.40
   2   8  -1  266.47   19.00
   1   8  -1   23.90    3.60
   1   8  -1   22.50    3.40
   1   8  -1    7.40   15.80
   0   8  -1   94.89    8.60
   0   8  -1   92.49   18.60
  -1   8  -1    5.80   13.10
  -1   8  -1   -1.40    3.00
  -1   8  -1    4.70    1.30
  -2   8  -1   -2.60    1.40
  -2   8  -1   -3.10    9.30
  -2   8  -1    5.50    1.70
  -3   8  -1   -0.20    1.70
  -3   8  -1    2.30    2.30
  -3   8  -1   -3.70    7.70
  -4   8  -1  174.48   13.70
  -4   8  -1  155.28   18.00
  -4   8  -1  163.78   13.00
  -5   8  -1   59.69    5.70
  -5   8  -1   51.39   14.00
  -6   8  -1  338.57   25.50
  -7   8  -1   12.20    1.90
  -7   8  -1    9.30    9.70
  -8   8  -1   69.69    5.50
   9   7  -1    0.20    6.70
  -9  -7   1    7.70    2.60
   8   7  -1   10.50    2.70
   7   7  -1   31.90    4.40
  -7  -7   1   39.40    5.90
   6   7  -1    8.20    3.70
  -6  -7   1    2.30    5.60
   5   7  -1    3.90    3.70
  -5  -7   1   10.40    4.40
   4   7  -1   34.20    4.50
  -4  -7   1   35.00    5.80
   3   7  -1   55.59   20.10
   3   7  -1   27.90    4.20
   2   7  -1  501.15   49.70
   2   7  -1  524.25   38.70
   1   7  -1   59.69   17.00
   1   7  -1   51.79    5.80
   1   7  -1   48.30    5.40
   0   7  -1  417.96   31.20
   0   7  -1  428.86   40.90
   0   7  -1  400.06   31.10
  -1   7  -1   27.20   13.10
  -1   7  -1   30.70    3.60
  -1   7  -1   39.60    3.90
   1  -7   1   28.80    4.90
  -2   7  -1    5.20    2.40
  -2   7  -1    9.80    9.80
  -2   7  -1    7.20    1.90
  -2   7  -1   10.20    3.40
  -3   7  -1   39.70    5.50
  -3   7  -1   36.40    9.70
  -4   7  -1    7.10    3.30
  -4   7  -1    9.90    8.00
  -4   7  -1   13.20    2.60
  -5   7  -1    3.00    2.80
  -5   7  -1   -4.70    7.50
  -5   7  -1    2.70    2.10
  -6   7  -1  125.59    9.50
  -6   7  -1   89.59   18.00
  -7   7  -1   14.60   11.40
  -7   7  -1   17.50    2.30
  -8   7  -1   88.79   16.30
  -8   7  -1  100.19    7.70
  -9   7  -1    0.50    0.90
  -9   7  -1   -0.30    5.60
   9  -7   1    2.00    1.50
  -9  -6   1    3.40    3.30
   8   6  -1   51.79    6.80
  -8  -6   1   68.79    6.80
   7   6  -1   11.50    4.20
  -7  -6   1   18.90    5.00
   6   6  -1    4.90    4.00
  -6  -6   1   -4.40    4.30
   5   6  -1   -1.80    3.80
  -5  -6   1    2.40    3.80
   4   6  -1   17.30    4.10
  -4  -6   1   24.50    4.10
   3   6  -1   16.40    3.30
  -3  -6   1   20.10    4.00
   2   6  -1  319.67   24.90
   1   6  -1   28.80   18.20
   1   6  -1   16.80    2.60
   0   6  -1  212.28   25.30
   0   6  -1  175.28   14.00
   0   6  -1  179.78   14.50
  -1   6  -1   21.60   12.50
  -2   6  -1   95.69    7.60
   2  -6   1   80.19    8.80
  -3   6  -1  142.79   11.50
  -3   6  -1  134.29   10.90
   3  -6   1  122.09   12.40
  -4   6  -1   65.39    7.00
  -4   6  -1   59.89    6.20
   4  -6   1   61.59    9.90
  -5   6  -1    6.30    3.00
  -5   6  -1    6.40    2.40
  -5   6  -1    3.30    6.90
  -6   6  -1  470.65   35.50
  -7   6  -1    2.10   10.50
  -7   6  -1    0.20    1.80
  -8   6  -1   68.69   17.20
  -8   6  -1   73.89    6.10
  -9   6  -1    1.40    1.50
  -9   6  -1   -5.90    7.60
   9  -6   1   -0.10    1.80
 -10   6  -1   45.00    7.60
 -10   6  -1   43.20    4.20
  10  -6   1   51.79    4.10
  10   5  -1    0.10    2.00
 -10  -5   1    4.80    2.70
   9   5  -1   -0.80    2.80
  -9  -5   1    1.80    3.20
   8   5  -1   70.49    7.20
   7   5  -1  106.69   10.20
  -7  -5   1  124.09   10.50
   6   5  -1   65.09    7.40
  -6  -5   1   75.59    7.80
   5   5  -1   20.30    3.80
  -5  -5   1   31.20    5.20
   4   5  -1   50.39    5.90
   4   5  -1   61.19    6.60
  -4  -5   1   58.49    6.50
  -4  -5   1   69.19    7.60
   3   5  -1    3.10    2.40
  -3  -5   1   -1.70    2.60
  -3  -5   1    0.50    3.10
   2   5  -1  220.88   16.90
  -2  -5   1  221.08   17.70
   1   5  -1    4.50    1.80
   0  -5   1 1829.52  136.19
  -1   5  -1    9.80    1.90
   2  -5   1  586.64   44.80
  -4   5  -1   42.70    5.30
  -4   5  -1   59.79    7.20
   4  -5   1   47.90    7.60
  -5   5  -1    1.00    1.70
  -5   5  -1   -0.30    6.20
  -5   5  -1    0.10    2.00
  -5   5  -1    0.40    2.40
   5  -5   1    3.80    5.00
  -6   5  -1   18.40    2.70
  -6   5  -1   16.10    2.60
  -6   5  -1    8.40    8.70
  -6   5  -1   22.80    4.00
  -7   5  -1  443.26   34.20
  -7   5  -1  425.46   34.00
  -7   5  -1  501.85   41.90
  -8   5  -1  147.19   11.60
  -8   5  -1  155.38   23.60
  -9   5  -1    3.50    8.80
  -9   5  -1    2.10    1.20
   9  -5   1    5.10    2.40
 -10   5  -1   41.70    3.80
 -10   5  -1   51.39    9.20
  10   4  -1    4.20    2.40
 -10  -4   1    9.20    5.30
   9   4  -1   10.50    3.70
  -9  -4   1   17.00    4.30
   8   4  -1  195.88   15.80
  -8  -4   1  198.08   15.80
   7   4  -1   29.00    5.60
  -7  -4   1   33.80    5.90
   6   4  -1  185.18   14.10
  -6  -4   1  161.98   14.00
   5   4  -1   77.39    7.20
  -5  -4   1   71.29    7.10
  -5  -4   1   57.29   10.00
  -5  -4   1   81.89    8.00
   4   4  -1   96.09    8.30
  -4  -4   1  103.39    9.30
  -4  -4   1   98.79   10.20
   3   4  -1    3.40    2.10
  -3  -4   1    1.60    2.20
   2   4  -1   72.69   53.39
  -2  -4   1  -29.60   50.99
  -1  -4   1   44.40   42.20
   0  -4   1  781.42  104.39
   2  -4   1 1265.77   94.99
   3  -4   1  296.17   24.40
   4  -4   1  239.78   24.20
  -5   4  -1   17.10    3.10
  -5   4  -1   12.30    2.40
  -5   4  -1   14.50    6.80
   5  -4   1   17.90    5.70
  -6   4  -1  226.38   15.90
  -6   4  -1  206.48   16.30
   6  -4   1  170.38   20.60
  -7   4  -1  304.77   32.10
  -7   4  -1  350.66   25.00
  -8   4  -1  201.48   14.60
  -8   4  -1  203.38   15.40
  -8   4  -1  155.28   22.90
  -9   4  -1   45.70    4.20
  -9   4  -1   71.09   13.30
  -9   4  -1   39.40    5.30
   9  -4   1   45.60    5.90
   9  -4   1   52.99    5.10
 -10   4  -1    4.20    6.40
 -10   4  -1    8.00    1.40
 -10   4  -1    4.20    1.80
  10  -4   1   10.40    2.20
  11  -4   1    2.70    1.60
  11   3  -1    5.60    1.80
  10   3  -1   19.90    3.40
 -10  -3   1   29.20    4.50
   9   3  -1    3.00    3.70
   8   3  -1   65.39    9.00
   8   3  -1   60.49    7.20
  -8  -3   1   58.89    7.20
   7   3  -1   14.80    3.70
   6   3  -1  529.55   44.30
   6   3  -1  642.04   43.90
   5   3  -1    4.50    2.70
  -5  -3   1   10.80    5.10
   4   3  -1  341.27   24.80
  -4  -3   1  315.27   25.70
  -3  -3   1    1.00    1.80
  -2  -3   1   67.19    6.00
  -1  -3   1    1.10    1.50
   0   3  -1  252.87   53.09
   0  -3   1  226.98   47.90
   1  -3   1   50.59    6.30
   2  -3   1  999.30   75.29
   3  -3   1    4.30    4.10
   4  -3   1  520.55   40.80
   5  -3   1    4.90    5.10
  -6   3  -1   15.30    9.20
  -6   3  -1   18.70    2.40
   6  -3   1   13.40    6.60
  -7   3  -1   92.99   16.60
   7  -3   1  110.69    8.80
  -8   3  -1   87.49   15.20
  -8   3  -1  106.89    7.90
   8  -3   1   93.09    9.10
  -9   3  -1    9.70    8.90
  -9   3  -1   13.30    1.90
  -9   3  -1    9.70    8.90
   9  -3   1   14.10    3.00
   9  -3   1   20.80    4.10
 -10   3  -1  209.68   20.20
 -10   3  -1  212.88   16.10
  10  -3   1  224.58   16.30
  10  -3   1  204.28   16.90
 -11   3  -1    2.30    1.50
  11  -3   1    5.00    2.00
  11  -3   1    6.20    2.90
  11   2  -1    3.50    2.20
  10   2  -1   17.10    5.10
  10   2  -1   11.70    3.40
   9   2  -1   -1.20    3.20
   8   2  -1   76.09    7.60
   8   2  -1   81.19    9.60
  -8  -2   1   78.79    8.10
   7   2  -1    5.50    4.60
   7   2  -1    1.50    3.00
  -7  -2   1   10.40    3.70
   6   2  -1  222.08   17.30
   5   2  -1   16.90    2.90
   4   2  -1  310.57   21.30
  -4  -2   1  246.28   22.00
  -3  -2   1  566.84   42.40
  -2  -2   1   11.10    2.10
  -1  -2   1   21.10    2.60
   0   2  -1  188.38   36.30
   0  -2   1  182.68   33.30
   1  -2   1   62.19    6.90
   2  -2   1  974.30   73.19
   3  -2   1  189.18   16.60
   4  -2   1   75.49    9.80
   5  -2   1    0.80    4.30
  -6   2  -1    1.70    8.10
  -6   2  -1    9.20    1.80
   6  -2   1   17.90    6.50
   7  -2   1  189.48   15.80
   7  -2   1  228.28   20.80
  -8   2  -1   99.49    7.30
  -8   2  -1   73.39   13.60
   8  -2   1   93.29    8.70
  -9   2  -1   -2.60    7.00
  -9   2  -1    1.10    1.30
   9  -2   1   -0.20    3.80
   9  -2   1   -0.60    2.60
 -10   2  -1  126.49   15.00
  10  -2   1  131.79   10.80
  10  -2   1  129.39   11.50
 -11   2  -1    2.60    2.00
  11  -2   1    1.00    3.20
  11  -2   1    0.40    2.20
  11   1  -1   17.90    3.00
  10   1  -1    0.10    2.90
  10   1  -1    4.30    4.60
   9   1  -1   80.29    8.80
   9   1  -1   65.59    6.80
  -9  -1   1   60.99    7.40
   8   1  -1   50.89    7.30
  -8  -1   1   43.40    6.40
   7   1  -1    9.60    2.90
   7   1  -1    9.40    4.90
   7   1  -1   10.50    3.70
   6   1  -1  158.58   13.20
   6   1  -1  168.58   12.70
   6   1  -1  159.78   14.30
  -6  -1   1  167.38   15.90
   5   1  -1   62.29    8.10
   5   1  -1   84.09    6.40
   4   1  -1  287.97  115.09
  -4  -1   1  346.27  126.39
   3   1  -1 2139.09  140.09
  -3  -1   1 1624.74  139.59
  -2  -1   1   28.50    3.00
  -2  -1   1   28.40    3.30
  -1  -1   1   16.40    2.10
   0   1  -1 1614.84  144.69
   0  -1   1 1935.21  154.68
  -1   1  -1   15.80   10.70
   1  -1   1   10.80    7.80
   2  -1   1  890.21   66.79
   3  -1   1   13.40    4.30
  -4   1  -1   57.19    5.50
   4  -1   1   82.09    9.50
   4  -1   1   65.39    5.90
   5  -1   1  125.59   10.90
   5  -1   1  145.59   13.70
  -6   1  -1  288.07   27.90
   6  -1   1  334.47   26.60
  -7   1  -1   12.90    7.70
  -7   1  -1   10.40    2.50
   7  -1   1   10.70    3.20
   7  -1   1   13.90    3.30
   7  -1   1   13.70    2.50
  -8   1  -1    4.90    6.80
  -8   1  -1    4.60    1.40
   8  -1   1    7.70    2.60
  -9   1  -1    2.40    6.40
   9  -1   1    6.20    4.30
   9  -1   1    1.50    2.60
  10  -1   1   39.90    5.80
  10  -1   1   40.20    5.20
  11  -1   1   14.10    2.60
  11   0  -1   31.80    5.60
  11   0  -1   27.10    3.80
  10   0  -1    5.00    4.80
   9   0  -1    4.60    3.10
   9   0  -1    5.70    4.60
   8   0  -1  135.89   11.50
   8   0  -1  130.69   10.70
  -8   0   1  141.69   11.30
  -8   0   1  117.29   15.00
   7   0  -1  232.58   18.50
   7   0  -1  206.38   16.70
   7   0  -1  212.18   16.20
  -7   0   1  195.18   19.50
   6   0  -1  118.69    9.70
   6   0  -1  136.19    9.40
  -6   0   1  115.69   10.70
  -6   0   1   94.89   13.50
   5   0  -1    8.50    4.10
   4   0  -1   91.69    9.20
   3   0  -1   14.90    3.50
  -3   0   1   15.70    2.30
   2   0  -1  386.56   28.40
   2   0  -1  368.16   28.20
  -2   0   1  362.76   27.90
  -2   0   1  375.56   28.50
   1   0  -1    7.20    1.40
   1   0  -1    8.30    1.70
  -1   0   1    7.20    1.80
  -1   0   1    8.60    1.20
   0   0   1   46.70    3.70
  -1   0  -1  495.75   36.40
   1   0   1  483.35   36.40
  -2   0  -1  729.23   54.39
   2   0   1  732.73   54.39
  -3   0  -1   92.99    7.40
   3   0   1   93.99    7.70
   3   0   1   87.49    7.70
   4   0   1   19.10    4.90
   4   0   1   23.60    2.90
   5   0   1  113.19   12.40
   5   0   1  104.09    9.20
   6   0   1   37.30    7.50
   6   0   1   49.90    4.50
   6   0   1   50.59    5.90
  -7   0  -1   61.99   10.90
   7   0   1   60.99    5.70
   7   0   1   73.49   12.10
   7   0   1   60.39    7.10
  -8   0  -1   -0.10    5.80
   8   0   1    1.10    2.40
   8   0   1    3.60    3.90
  -9   0  -1   11.70    7.10
   9   0   1   21.40    3.40
   9   0   1   24.00    5.10
  10   0   1   84.89    9.00
  10   0   1   76.69    7.40
  11   0   1   10.60    4.40
  11   0   1    7.90    2.50
  11  -1  -1   11.00    4.00
  11  -1  -1    7.80    2.40
  10  -1  -1   37.90    5.20
  10  -1  -1   46.10    6.90
   9  -1  -1    2.40    4.10
   9  -1  -1    3.70    2.80
  -9   1   1    3.70    6.60
   8  -1  -1   11.60    4.20
   8  -1  -1    5.80    3.00
  -8   1   1    5.60    6.60
   7  -1  -1    6.70    3.10
  -7   1   1    2.50    6.50
   6  -1  -1   99.89    9.20
   6  -1  -1  116.59   11.90
  -6   1   1  128.19   14.40
   5  -1  -1    1.70    3.90
   4  -1  -1   23.90    4.50
   3  -1  -1   85.19    8.60
   3  -1  -1   78.99    7.50
   2  -1  -1  420.16   31.10
  -2   1   1  395.26   31.20
   1  -1  -1    2.30    1.90
   0  -1  -1  165.78   13.00
   0  -1  -1  174.48   13.00
   0   1   1  185.48   13.10
   0   1   1  166.58   13.00
  -1  -1  -1  643.04   46.40
  -1  -1  -1  604.14   46.40
   1   1   1  628.24   46.50
  -2  -1  -1   99.09    7.50
  -2  -1  -1   88.59    7.70
   2   1   1   99.79    7.60
   2   1   1   90.79    7.50
  -3  -1  -1    1.40    2.60
   3   1   1   -0.80    2.10
   3   1   1    0.90    1.90
  -4  -1  -1   56.99    6.90
   4   1   1   53.39    8.10
   4   1   1   57.19    5.50
   5   1   1    4.50    2.30
   5   1   1   -1.10    4.70
  -6  -1  -1  392.16   34.70
   6   1   1  422.66   32.50
   6   1   1  480.95   34.70
   6   1   1  414.76   31.80
  -7  -1  -1    5.50    5.50
   7   1   1   20.00    6.60
   7   1   1    2.40    3.50
   7   1   1    4.90    2.40
   8   1   1   42.80    6.80
   8   1   1   35.80    5.00
   9   1   1   17.10    5.10
   9   1   1   11.60    3.30
  10   1   1   44.10    7.30
  10   1   1   40.20    5.10
  11   1   1   22.10    3.30
  11  -2  -1    2.50    3.60
  11  -2  -1    1.00    2.60
  10  -2  -1   71.99    6.90
  10  -2  -1   74.29    8.00
   9  -2  -1    3.00    2.90
   9  -2  -1    7.60    4.20
  -9   2   1    2.20    6.80
   8  -2  -1   -4.10    3.70
   8  -2  -1    3.40    2.90
  -8   2   1    2.90    1.50
  -8   2   1   -1.30    7.00
   7  -2  -1   86.59   10.90
   7  -2  -1   65.59    7.00
  -7   2   1   79.39    6.40
  -7   2   1   75.09   13.20
   6  -2  -1  196.88   17.00
   6  -2  -1  248.58   19.30
  -6   2   1  216.08   17.30
  -6   2   1  229.08   22.60
   5  -2  -1   25.60    5.10
   4  -2  -1  248.88   20.30
   3  -2  -1  135.99   12.20
   2  -2  -1  681.33   52.89
  -2   2   1  686.73   51.89
   1  -2  -1   14.20    2.20
   1  -2  -1   20.00    2.80
  -1   2   1   18.90    3.70
   0  -2  -1  236.68   20.00
   0  -2  -1  265.67   20.10
   0  -2  -1  299.67   20.20
  -1  -2  -1  136.69   10.90
   1   2   1  142.89   10.70
   1   2   1  138.49   11.00
  -2  -2  -1  219.98   16.90
  -2  -2  -1  214.18   17.00
   2   2   1  231.38   17.10
   2   2   1  230.08   17.00
  -3  -2  -1    8.80    1.90
  -3  -2  -1   12.20    2.30
   3   2   1   11.90    2.20
   3   2   1    9.70    2.10
  -4  -2  -1 1062.09   78.59
   4   2   1 1050.39   78.39
   4   2   1 1040.00   78.99
  -5  -2  -1    7.00    4.10
   5   2   1   -0.90    2.00
   5   2   1   -3.30    4.50
   5   2   1    4.10    2.70
  -6  -2  -1  391.96   30.20
   6   2   1  376.96   30.40
   6   2   1  407.56   32.30
   6   2   1  433.86   30.20
   6   2   1  393.66   30.70
  -7  -2  -1   12.30    3.50
   7   2   1    6.30    7.00
   7   2   1    2.30    2.80
   7   2   1    6.40    4.10
  -8  -2  -1   80.79    8.20
   8   2   1   71.49    9.10
   9   2   1    8.20    3.30
   9   2   1    9.90    5.20
  10   2   1    4.30    5.20
  11   2   1    1.70    2.40
  11   2   1   -0.90    4.00
  11  -3  -1   65.39    6.80
  11  -3  -1   63.29    5.70
  10  -3  -1  126.19   10.70
  10  -3  -1  125.79   10.00
 -10   3   1  118.19   14.50
   9  -3  -1   24.30    3.60
   9  -3  -1   22.70    4.60
  -9   3   1   13.40    2.10
  -9   3   1   11.10    8.20
   8  -3  -1   27.80    4.00
  -8   3   1   18.00    9.60
  -8   3   1   22.20    2.70
   7  -3  -1  140.39   12.70
  -7   3   1  171.18   12.90
  -7   3   1  146.09   19.90
  -7   3   1  164.98   12.30
   6  -3  -1   59.49    9.10
  -6   3   1   58.79   14.20
  -6   3   1   56.49    6.00
   5  -3  -1    2.00    4.00
   4  -3  -1  888.41   67.29
   3  -3  -1    0.90    3.20
   2  -3  -1 2136.39  151.28
  -2   3   1 1917.31  151.48
   1  -3  -1   22.10    3.30
  -1   3   1   22.60    4.60
   0  -3  -1  164.68   13.70
   0  -3  -1  193.68   14.50
   0   3   1  181.88   14.50
  -1  -3  -1  274.67   20.90
  -2  -3  -1   12.00    1.90
  -2  -3  -1   16.40    2.40
   2   3   1   15.70    2.30
   2   3   1   15.60    2.40
  -3  -3  -1   41.60    4.90
   3   3   1   42.50    4.50
  -4  -3  -1  318.87   24.40
   4   3   1  309.47   24.00
  -5  -3  -1   86.29    9.10
   5   3   1   73.39    7.30
   5   3   1   71.49    6.60
  -6  -3  -1  560.34   41.90
   6   3   1  552.94   41.80
   6   3   1  561.14   42.10
  -7  -3  -1    6.10    3.50
   7   3   1    2.40    3.00
   7   3   1    5.40    4.70
  -8  -3  -1   44.20    6.70
   8   3   1   42.60    5.90
   8   3   1   55.89    8.20
   9   3   1    9.60    3.80
  10   3   1   30.90    4.20
  10   3   1   34.00    6.00
  11  -4  -1    3.10    2.70
  11  -4  -1    1.90    1.80
  10  -4  -1   91.39    7.70
  10  -4  -1   95.09    9.20
 -10   4   1   85.89   11.80
   9  -4  -1  234.58   17.70
   9  -4  -1  224.28   18.10
  -9   4   1  218.28   17.50
  -9   4   1  249.08   23.10
   8  -4  -1    1.90    3.00
  -8   4   1    2.60    1.80
  -8   4   1   -1.00    9.70
   7  -4  -1   56.39    6.40
  -7   4   1   60.69    6.40
  -7   4   1   64.99   16.50
  -7   4   1   61.29    5.80
   6  -4  -1    5.30    5.00
   6  -4  -1   10.10    2.60
  -6   4   1    8.90    2.90
  -6   4   1    7.20    2.60
  -6   4   1    4.90    9.10
   5  -4  -1  137.29   12.90
  -5   4   1  110.09   11.40
  -5   4   1  148.19   10.90
   4  -4  -1  654.13   51.09
   3  -4  -1    4.00    3.40
   2  -4  -1 6972.10  517.05
   1  -4  -1    0.90    2.40
   1  -4  -1    1.60    1.90
  -1   4   1    6.20    3.80
   0  -4  -1  286.77   22.00
   0  -4  -1  310.57   22.30
   0   4   1  276.17   23.00
  -1  -4  -1  516.85   38.90
  -2  -4  -1  215.78   16.80
  -3  -4  -1   50.99    5.90
   3   4   1   51.39    5.30
   4   4   1  388.76   29.60
   4   4   1  399.06   30.00
  -5  -4  -1   58.59    8.60
  -5  -4  -1   56.59    5.70
   5   4   1   47.60    7.10
  -6  -4  -1  193.08   17.00
  -6  -4  -1  166.48   14.10
   6   4   1  181.78   15.30
  -7  -4  -1   34.80    5.10
   7   4   1   30.70    6.60
   7   4   1   19.60    4.50
  -8  -4  -1   83.89    8.00
   8   4   1   79.79   10.50
   8   4   1   77.39    8.30
  -9  -4  -1   80.89    8.50
   9   4   1   74.19    7.60
   9   4   1   77.29    9.80
  10   4   1    0.90    2.70
  11   4   1   64.89    5.60
  10  -5  -1   29.80    4.30
  10  -5  -1   30.90    3.70
 -10   5   1   24.80    2.90
 -10   5   1   32.70    8.40
   9  -5  -1   63.09    6.70
  -9   5   1   74.19   13.20
  -9   5   1   54.49    5.20
   8  -5  -1  345.77   25.80
  -8   5   1  276.37   39.60
  -8   5   1  360.76   25.50
   7  -5  -1    5.60    3.40
  -7   5   1   10.00    1.90
  -7   5   1    5.50    2.40
  -7   5   1   -0.20   12.50
  -7   5   1    5.80    2.80
   6  -5  -1    1.90    2.60
  -6   5   1   -1.70   14.40
  -6   5   1    3.60    2.90
  -6   5   1    2.10    2.80
   5  -5  -1   30.50    4.10
   5  -5  -1   49.60    7.80
  -5   5   1   30.70    4.70
  -5   5   1   37.90    4.40
   4  -5  -1  237.38   20.50
  -4   5   1  241.28   21.90
  -4   5   1  253.27   19.70
   3  -5  -1   35.40    6.50
   2  -5  -1  109.99    9.90
   2  -5  -1  107.69    9.90
   1  -5  -1    6.40    2.20
   1  -5  -1    0.20    2.60
  -1   5   1    1.50    1.50
   0  -5  -1  646.64   48.70
  -1  -5  -1   12.90    2.90
   1   5   1   14.90    2.40
  -2  -5  -1   93.19    8.40
   2   5   1   93.99    7.70
  -3  -5  -1   33.80    5.50
   3   5   1   28.80    3.80
  -4  -5  -1   79.79    7.60
  -4  -5  -1   93.69    8.70
  -5  -5  -1  239.28   18.90
  -5  -5  -1  202.68   16.50
   5   5   1  197.08   16.30
   6   5   1  102.69    9.10
  -7  -5  -1    0.30    3.70
   7   5   1    4.80    5.90
   8   5   1  190.18   15.30
  -9  -5  -1    5.00    3.70
   9   5   1    3.50    3.10
  10   5   1   43.80    4.80
  10  -6  -1   50.89    4.30
 -10   6   1   40.70    3.80
 -10   6   1   57.79    7.70
  -9   6   1    6.50    8.00
  -9   6   1   11.00    1.90
   8  -6  -1   69.79    6.70
  -8   6   1   88.29   18.40
  -8   6   1   75.29    6.30
   7  -6  -1   32.60    4.50
  -7   6   1   24.80    3.30
  -7   6   1   17.50   13.80
  -7   6   1   27.70    4.80
   6  -6  -1    1.20    2.60
  -6   6   1    1.50    3.00
  -6   6   1   -1.40    2.50
  -6   6   1    1.30   10.00
  -5   6   1   24.30    4.80
  -5   6   1   22.80    4.20
   4  -6  -1   39.80    8.70
   4  -6  -1   39.30    6.50
  -4   6   1   41.20    5.00
  -4   6   1   40.20    5.90
   3  -6  -1    3.20    3.20
   3  -6  -1    7.80    3.60
  -3   6   1    3.30    3.30
  -3   6   1   10.00    9.40
   2  -6  -1  290.07   23.60
   2  -6  -1  284.67   23.90
  -2   6   1  323.57   24.40
   1  -6  -1   49.10    5.10
   1  -6  -1   46.20    5.90
  -1   6   1   42.20    4.50
   0  -6  -1  361.66   26.30
   0   6   1  317.87   25.50
  -1  -6  -1   55.19    5.80
   1   6   1   43.00    4.70
  -2  -6  -1  349.17   27.00
   2   6   1  350.56   26.40
  -3  -6  -1    3.20    3.50
  -3  -6  -1    6.30    2.60
   3   6   1    6.10    2.50
  -4  -6  -1   17.40    4.20
   4   6   1   11.50    3.30
  -5  -6  -1   15.60    5.10
   5   6   1   13.50    3.80
  -6  -6  -1   52.49    6.40
   6   6   1   50.29    6.80
  -7  -6  -1    5.10    4.00
   7   6   1    3.90    4.00
  -8  -6  -1  102.99    9.20
   8   6   1   89.09    9.10
  -9  -6  -1    5.30    3.40
   9   6   1   -0.60    3.00
 -10  -6  -1   19.70    3.10
  10   6   1   12.30    2.40
   9  -7  -1   13.20    2.20
  -9   7   1    7.60    1.30
  -9   7   1    8.70    6.50
  -8   7   1  216.58   16.30
  -8   7   1  211.78   23.90
  -7   7   1   93.29    8.70
  -7   7   1   93.39    8.10
  -7   7   1  103.39   20.10
  -6   7   1  214.28   18.70
  -6   7   1  246.28   18.00
  -5   7   1   26.30    4.60
  -5   7   1   31.50    4.20
  -4   7   1    4.10    3.50
  -4   7   1    2.10    3.50
  -4   7   1   -0.50    8.50
   3  -7  -1    6.20    3.40
  -3   7   1    0.10    9.20
  -3   7   1   -0.90    3.30
  -3   7   1    2.10    3.40
   2  -7  -1    8.10    2.80
   2  -7  -1    8.20    4.10
  -2   7   1    5.10   11.80
  -2   7   1    3.30    3.20
  -2   7   1    8.30    4.10
   1  -7  -1    8.50    3.90
  -1   7   1   10.20    4.00
  -1   7   1   13.10    2.60
  -1   7   1    8.30   13.20
   0   7   1  171.08   14.60
   0   7   1  186.08   27.70
   0   7   1  191.48   14.70
   0   7   1  214.58   17.00
  -1  -7  -1   25.80    4.80
   1   7   1   17.70   15.40
   1   7   1   31.90    3.50
   1   7   1   26.80    3.20
  -2  -7  -1  426.16   30.90
  -2  -7  -1  367.56   30.00
   2   7   1  401.66   29.90
  -3  -7  -1    6.60    3.10
   3   7   1    6.80    2.70
  -4  -7  -1    7.80    4.20
   4   7   1   11.10    3.50
  -5  -7  -1    4.00    4.20
   5   7   1    6.50    5.40
  -6  -7  -1   34.10    5.40
   6   7   1   27.20    5.00
  -7  -7  -1    6.60    4.20
   7   7   1    4.20    4.00
  -8  -7  -1   92.89    8.20
   8   7   1   77.29    8.20
  -9  -7  -1    1.90    2.60
   9   7   1    0.40    2.30
  -8   8   1   45.80   11.60
  -8   8   1   62.69    4.90
  -7   8   1   21.30   11.20
  -7   8   1   26.90    3.40
  -6   8   1  152.28   11.80
  -6   8   1  139.39   12.40
  -5   8   1    0.10   10.60
  -5   8   1   26.90    6.20
  -4   8   1   10.30    3.70
  -4   8   1    2.70    7.40
  -4   8   1   12.70    3.20
  -3   8   1    6.60    3.40
  -3   8   1    3.40    3.60
  -3   8   1    7.00    9.00
  -2   8   1    5.30   10.60
  -2   8   1   10.20    3.20
  -2   8   1    9.00    3.90
  -2   8   1   13.70    2.90
  -1   8   1   36.90   14.80
  -1   8   1   28.30    6.40
   0   8   1  161.38   12.50
   0   8   1  154.88   12.40
   0   8   1  143.79   12.50
   0   8   1  177.58   14.20
   0   8   1  129.49   25.70
   1   8   1   56.69    5.50
   1   8   1   49.90   17.20
   1   8   1   46.90    5.60
  -2  -8  -1 1253.97   90.79
   2   8   1 1176.58   99.69
  -3  -8  -1   13.80    3.80
   3   8   1   10.90    3.40
   3   8   1    8.60   18.00
  -4  -8  -1   18.80    4.50
   4   8   1   13.30    3.90
   4   8   1    6.10   20.40
   5   8   1   61.89    7.30
  -6  -8  -1    8.60    4.40
   6   8   1    4.80    3.80
  -7  -8  -1   11.10    3.70
   7   8   1    6.80    3.40
   8   8   1    4.00   12.20
  -7   9   1    9.10    8.00
  -7   9   1   11.60    1.60
  -6   9   1  120.49   19.00
  -6   9   1  153.28   11.10
  -5   9   1    9.90    3.10
  -5   9   1   -0.80    9.10
  -5   9   1    9.00    2.30
  -4   9   1  108.99    9.30
  -4   9   1  108.09   10.30
  -3   9   1    0.10    2.90
  -3   9   1   -2.80   14.00
  -3   9   1   -0.30    2.20
  -2   9   1   35.80    5.70
  -2   9   1   27.20    3.60
  -2   9   1   37.20    4.90
  -1   9   1    5.90   10.90
  -1   9   1    9.30    3.20
  -1   9   1   10.30    2.20
   1   9   1   -2.40   13.70
   2   9   1   14.80    2.90
   2   9   1   18.80    3.50
   2   9   1    1.50   14.90
   3   9   1   56.79    6.40
   3   9   1   35.10   24.70
  -4  -9  -1  253.97   19.70
   4   9   1  250.87   19.70
  -5  -9  -1   16.00    4.00
   5   9   1   19.30    4.00
   5   9   1   -0.80   16.70
   6   9   1    0.10   14.80
   6   9   1    4.30    3.20
  -7  -9  -1   27.00    4.00
   7   9   1    3.70   11.80
   7   9   1   24.60    3.00
  -6  10   1   92.59    6.70
  -6  10   1   69.79   12.30
  -5  10   1    3.80    8.10
  -5  10   1    7.20    1.40
  -4  10   1   48.60    5.00
  -3  10   1    1.80    2.30
  -3  10   1   -0.20    1.40
  -3  10   1    2.80    6.70
  -2  10   1    2.20    2.00
  -2  10   1    1.60    1.30
  -2  10   1    1.40    7.80
  -1  10   1    0.20    8.90
   0  10   1  181.48   14.20
   1  10   1   42.20   14.40
   2  10   1   56.39   16.40
   3  10   1    7.90   14.20
   4  10   1    9.90   14.30
  -5 -10  -1    2.80    3.00
   5  10   1    3.10   12.60
  -6 -10  -1   23.10    3.70
   6  10   1   31.30    3.20
  -4  11   1   80.59    6.20
  -3  11   1    1.10    5.90
  -2  11   1    1.50    5.70
  -1  11   1    1.00    7.30
   1  11   1    0.60   10.60
   2  11   1    2.00   10.80
   3  11   1   -0.30   10.30
   4  11   1    6.80    9.70
   1  11  -2   20.30    3.10
   0  11  -2   22.10    5.50
  -1  11  -2    6.50    4.70
   4  10  -2    1.50    8.00
   3  10  -2    4.50    9.70
   2  10  -2    4.00   14.70
   2  10  -2   17.30    4.20
   1  10  -2    1.80    9.40
   0  10  -2    7.30    9.00
  -1  10  -2    0.40    7.10
  -2  10  -2   54.29   10.50
  -3  10  -2   -0.40    6.30
  -4  10  -2    2.40    7.20
  -5  10  -2   -0.30    6.60
   6   9  -2    2.50    8.00
   5   9  -2    2.10   10.50
   4   9  -2   -0.90   12.70
   3   9  -2   -1.10   13.40
   2   9  -2   13.30    3.60
   2   9  -2    6.10   14.10
   1   9  -2    5.40   14.30
   0   9  -2  124.89   33.90
  -1   9  -2   23.80   19.80
  -3   9  -2   13.50    7.20
  -3   9  -2   20.60    2.30
  -4   9  -2   34.90    8.70
  -4   9  -2   30.50    3.10
  -5   9  -2   -1.60    7.70
  -5   9  -2    0.80    1.60
  -6   9  -2   12.80    8.30
  -6   9  -2   14.60    1.70
  -7   9  -2   49.70    3.80
  -7   9  -2   32.20    8.90
   7   8  -2    4.60    9.10
  -7  -8   2   21.20    3.90
   6   8  -2   60.49    6.20
   6   8  -2   57.49   15.10
   5   8  -2   42.20    5.00
   5   8  -2   36.40   16.30
   4   8  -2   40.20    5.10
   3   8  -2  139.99   10.70
   3   8  -2   98.59   22.70
   2   8  -2    7.70    3.60
   2   8  -2    4.20    2.80
   2   8  -2   -3.00   15.30
   1   8  -2   -2.10   14.00
   1   8  -2    0.90    3.10
   0   8  -2   83.69   23.00
  -1   8  -2   27.30   13.70
  -1   8  -2   48.10    5.00
  -2   8  -2  127.09   19.60
  -2   8  -2  161.88   11.50
  -3   8  -2   84.59   13.90
  -3   8  -2   87.59    7.00
  -4   8  -2  314.07   27.00
  -4   8  -2  419.26   33.60
  -5   8  -2    1.50    1.60
  -5   8  -2    2.60    8.00
  -6   8  -2    4.30    1.60
  -6   8  -2    9.50    9.10
  -7   8  -2   18.30    2.70
  -7   8  -2   18.80   10.90
  -8   8  -2    3.50    5.40
   8   7  -2   12.20    9.10
   7   7  -2    3.20    2.40
   7   7  -2    3.20   12.00
  -7  -7   2   10.10    3.90
  -6  -7   2  102.29    9.70
   5   7  -2    5.50    3.30
   4   7  -2   13.50    3.70
   4   7  -2    9.00   18.80
   3   7  -2    6.80   17.60
   2   7  -2    3.40    3.60
   2   7  -2    5.60    3.00
   2   7  -2    0.80   16.00
   1   7  -2   10.20    2.70
   0   7  -2  280.17   32.20
  -1   7  -2    6.60   12.50
  -2   7  -2  358.46   28.60
  -2   7  -2  410.26   35.40
  -3   7  -2   14.90    2.70
  -3   7  -2   18.90    8.40
  -3   7  -2   14.90    2.20
  -4   7  -2   33.40    7.90
  -4   7  -2   25.20    3.00
  -5   7  -2   -1.20    1.70
  -5   7  -2   -1.40    7.50
  -6   7  -2    3.10    9.10
  -6   7  -2    8.20    1.90
  -7   7  -2   39.60    4.20
  -7   7  -2   53.09   11.80
  -8   7  -2   10.40    1.50
  -8   7  -2    8.20    8.40
  -9   7  -2    2.20    1.00
  -9   7  -2    0.40    4.80
  -9  -6   2    9.50    3.10
   8   6  -2   74.39    7.70
  -8  -6   2   97.99    8.10
  -7  -6   2   17.40    5.00
   6   6  -2  142.69   13.50
  -6  -6   2  179.78   13.80
   5   6  -2    7.60    3.80
  -5  -6   2    7.70    4.50
   4   6  -2   26.00    4.50
  -4  -6   2   40.40    5.70
   3   6  -2    3.90    3.20
   3   6  -2    5.70    2.90
   3   6  -2    4.40    2.90
   2   6  -2    9.50    2.60
   2   6  -2    6.40    2.90
   2   6  -2    6.70    2.80
   2   6  -2    2.90   15.00
  -2  -6   2    6.10    3.10
   1   6  -2    6.90    2.70
   1   6  -2   15.30    3.70
   1   6  -2   25.60   14.30
   0   6  -2  295.07   30.40
   0   6  -2  271.07   20.50
   0   6  -2  245.78   20.30
   0  -6   2  278.17   21.20
  -1   6  -2   -4.90   10.80
  -1   6  -2    2.10    2.80
  -2   6  -2  535.75   40.10
  -3   6  -2  125.89   10.80
  -3   6  -2  131.59   10.20
  -4   6  -2  394.26   29.90
  -4   6  -2  383.36   29.30
  -5   6  -2    2.60    1.90
  -5   6  -2    4.20    7.10
  -6   6  -2  119.59    9.70
  -6   6  -2  122.69   17.90
  -7   6  -2  106.99    8.70
  -7   6  -2  104.99   18.30
  -8   6  -2    2.20    1.40
  -8   6  -2    1.00    8.40
  -9   6  -2    6.70    1.20
 -10  -5   2    2.70    2.50
   9   5  -2   -0.20    2.60
  -9  -5   2    4.00    3.20
   8   5  -2   15.20    3.70
  -8  -5   2   22.70    4.50
   7   5  -2   -1.70    3.30
  -7  -5   2    6.10    4.40
   6   5  -2  496.45   40.80
  -6  -5   2  588.74   41.10
   5   5  -2    4.00    3.50
   5   5  -2    2.80    3.20
  -5  -5   2    0.10    3.70
   4   5  -2  125.19   11.00
   4   5  -2  123.69   10.40
  -4  -5   2  133.89   11.40
  -4  -5   2  119.39   10.60
   3   5  -2   58.39    5.70
  -3  -5   2   52.69    7.00
   2   5  -2   40.30    4.30
   2   5  -2   36.60    4.60
  -2  -5   2   38.80    5.60
   1   5  -2   14.90    2.20
  -1  -5   2   15.70    2.90
   0   5  -2    1.60    1.70
   2  -5   2  674.13   51.49
  -3   5  -2   34.00    3.70
  -4   5  -2 1302.97  112.39
  -4   5  -2 1672.63  114.79
  -4   5  -2 1555.44  112.89
  -4   5  -2 1521.45  112.39
  -5   5  -2  287.57   21.50
  -5   5  -2  264.27   21.60
  -5   5  -2  301.97   26.00
  -6   5  -2   30.50   10.20
  -6   5  -2   43.80    4.30
  -6   5  -2   40.90    4.30
  -7   5  -2  280.87   20.30
  -7   5  -2  274.27   20.20
  -7   5  -2  229.48   27.70
  -8   5  -2    0.80    2.00
  -8   5  -2    0.30   10.20
  -8   5  -2    0.40    1.40
  -9   5  -2   20.80    3.00
  -9   5  -2   22.10    2.50
  -9   5  -2   10.20    8.50
   9  -5   2   25.30    3.30
 -10   5  -2   49.10    4.20
 -10   5  -2   49.20    8.40
  10  -5   2   55.09    4.40
  10   4  -2    3.90    2.10
 -10  -4   2   10.40    3.00
   9   4  -2    5.90    2.90
  -9  -4   2    7.60    4.10
   8   4  -2   15.20    3.70
  -8  -4   2   26.40    5.10
  -7  -4   2    4.80    4.30
   6   4  -2   58.39    6.50
   5   4  -2    2.80    3.10
   5   4  -2    1.30    2.70
  -5  -4   2   -2.30    3.90
   4   4  -2  398.76   29.90
   4   4  -2  408.46   30.50
  -4  -4   2  385.96   30.50
   3   4  -2    0.50    1.90
  -3  -4   2    1.80    2.40
   2   4  -2   89.69    7.50
  -2  -4   2   91.79    8.10
  -1  -4   2   41.30    4.80
   2  -4   2  401.56   31.70
   3  -4   2   17.70    5.30
  -4   4  -2 1875.11  123.59
   4  -4   2 1444.26  125.39
  -5   4  -2   29.70    4.20
  -5   4  -2   34.60    7.80
  -5   4  -2   37.00    3.70
   5  -4   2   28.20    7.50
  -6   4  -2  379.96   35.20
  -6   4  -2  419.46   30.20
  -6   4  -2  396.36   30.00
  -7   4  -2  187.78   14.60
  -7   4  -2  193.18   15.00
  -8   4  -2  131.89   11.10
  -8   4  -2  135.99   10.50
  -9   4  -2   25.70    2.70
  -9   4  -2   28.20    9.30
  -9   4  -2   20.90    3.20
 -10   4  -2    3.50    5.50
 -10   4  -2    3.40    1.60
 -10   4  -2    2.10    1.20
  10  -4   2    5.50    1.80
  11  -4   2    3.80    1.40
  10   3  -2   14.70    2.70
  -9  -3   2    4.70    3.90
   8   3  -2   -1.30    3.70
  -8  -3   2    3.10    4.10
   7   3  -2   19.40    4.30
  -7  -3   2   33.10    6.10
   6   3  -2  188.38   14.90
   5   3  -2    4.30    3.00
   5   3  -2   -1.90    2.70
  -5  -3   2    2.60    3.30
  -5  -3   2    0.90    2.80
   4   3  -2 1191.08   87.29
  -4  -3   2 1157.58   88.59
  -3  -3   2   68.19    6.40
  -2  -3   2  766.92   57.29
  -1  -3   2   53.59    4.90
  -1  -3   2   52.39    5.10
   0  -3   2    1.90    1.60
   2  -3   2  160.18   14.50
   3  -3   2   10.50    4.90
   4  -3   2  880.11   67.49
  -5   3  -2    5.50    1.50
  -5   3  -2    0.60    5.80
   5  -3   2    1.60    5.00
  -6   3  -2  514.05   33.40
  -6   3  -2  369.06   37.70
  -7   3  -2    1.40    2.40
  -7   3  -2   -1.40   10.90
  -8   3  -2   18.00    9.90
  -8   3  -2   31.40    3.20
   8  -3   2   34.00    4.60
  -9   3  -2    1.00    3.20
  -9   3  -2    4.70    7.90
   9  -3   2   -0.30    2.30
 -10   3  -2    4.20    1.70
 -10   3  -2    2.30    2.30
 -10   3  -2    0.60    5.60
  10  -3   2    4.20    2.20
  10  -3   2    9.10    3.80
 -11   3  -2    5.50    1.40
  11   2  -2   20.50    2.80
  10   2  -2   47.00    5.60
 -10  -2   2   51.59    6.20
   9   2  -2    4.70    3.50
   8   2  -2    1.10    5.30
   8   2  -2    1.80    3.30
  -8  -2   2    4.00    4.00
   7   2  -2   10.90    3.20
   6   2  -2  134.89   10.30
   6   2  -2  128.99   11.10
  -6  -2   2  114.99   10.60
   5   2  -2   50.79    5.40
  -5  -2   2   59.59    6.70
   4   2  -2 2185.98  153.78
  -4  -2   2 1960.90  154.08
  -3  -2   2   36.10    4.00
  -2  -2   2  703.93   52.49
  -1  -2   2   16.50    2.70
   0   2  -2  157.38   27.80
   0  -2   2  115.59   31.70
   2  -2   2   65.79    8.40
   3  -2   2    1.40    4.20
   4  -2   2  934.71   71.29
   5  -2   2   -2.90    5.20
  -6   2  -2  710.63   64.69
  -6   2  -2  901.21   58.79
   6  -2   2  743.33   61.59
  -7   2  -2   20.80    2.90
  -7   2  -2   25.00   10.20
   7  -2   2   30.60    4.70
  -8   2  -2  224.68   15.00
  -8   2  -2  158.58   20.30
   8  -2   2  206.68   15.80
   8  -2   2  185.48   15.60
  -9   2  -2    2.10    2.40
  -9   2  -2    1.70    7.10
   9  -2   2   -0.40    5.70
   9  -2   2    0.30    2.40
 -10   2  -2    2.00    3.10
 -10   2  -2    2.70    2.30
 -10   2  -2   -2.50    5.70
  10  -2   2    3.70    2.40
  10  -2   2   10.30    4.20
 -11   2  -2    0.30    1.70
  11  -2   2   -1.50    3.10
  11   1  -2    0.30    2.10
  10   1  -2  120.49   10.40
  10   1  -2  134.19   11.40
   9   1  -2   84.09   12.80
   9   1  -2  106.49    9.10
  -9  -1   2  121.59   11.80
   8   1  -2   11.00    3.40
   8   1  -2    9.20    5.00
  -8  -1   2   11.60    4.40
   7   1  -2   55.89    7.10
   7   1  -2   65.19    6.20
   6   1  -2    7.20    3.60
  -6  -1   2    3.60    2.70
   5   1  -2    0.30    2.70
   5   1  -2    9.00    2.10
   4   1  -2  244.38  110.79
  -4  -1   2  349.17  150.98
  -3  -1   2   52.79    4.90
   2   1  -2 9573.44  835.32
  -2  -1   2 9999.00  856.51
  -1  -1   2   26.80    2.90
   0  -1   2  845.32   62.79
   1  -1   2  306.37   23.00
   2  -1   2  266.97   20.20
   3  -1   2   19.90    2.60
   4  -1   2  141.29   13.20
   4  -1   2  125.49   10.60
   5  -1   2  516.85   40.20
   5  -1   2  495.45   38.20
  -6   1  -2  774.92   70.79
   6  -1   2  934.61   67.89
   6  -1   2 1014.50   70.39
  -7   1  -2    2.60    1.30
  -7   1  -2   -1.50    7.50
   7  -1   2    8.10    7.60
   7  -1   2    4.70    3.10
   7  -1   2    8.10    3.00
   7  -1   2    9.30    2.20
  -8   1  -2  192.98   18.00
  -8   1  -2  153.68   12.50
   8  -1   2  159.98   12.70
   8  -1   2  154.38   13.60
  -9   1  -2   11.60    2.10
  -9   1  -2   18.80    7.40
   9  -1   2   20.60    3.00
   9  -1   2   26.30    5.00
  10  -1   2    5.60    4.50
 -11   1  -2    4.50    2.40
  11  -1   2   10.00    2.20
  11  -1   2   13.00    3.80
  11   0  -2    7.50    2.30
  11   0  -2    4.50    3.50
  10   0  -2  111.69   10.20
  10   0  -2   95.79    8.70
   9   0  -2   29.00    4.10
   9   0  -2   39.90    8.80
   8   0  -2  250.87   19.30
   8   0  -2  248.58   19.80
   7   0  -2   24.10    4.40
   7   0  -2   16.90    5.60
   7   0  -2   21.10    3.10
  -7   0   2   28.20    4.00
  -7   0   2   13.60    6.40
   6   0  -2   73.29    6.70
   6   0  -2   58.99    7.80
  -6   0   2   66.99    9.50
   5   0  -2   13.00    3.60
   4   0  -2  155.58   12.90
  -3   0   2  193.38   15.60
  -3   0   2  182.58   14.50
   2   0  -2 2892.41  212.78
   2   0  -2 2721.23  212.68
  -2   0   2 3005.90  213.08
  -2   0   2 2855.91  212.68
   1   0  -2    3.40    1.10
   1   0  -2    4.70    1.40
  -1   0   2    4.50    1.10
  -1   0   2    3.00    1.80
   0   0  -2 2585.04  191.58
   1   0   2  646.34   48.10
  -2   0  -2   16.80    2.30
   2   0   2   15.20    2.20
  -3   0  -2    2.60    1.40
   3   0   2    0.70    1.80
   4   0   2  509.85   38.30
   5   0   2  505.45   39.20
   5   0   2  481.95   37.30
  -6   0  -2  880.11   60.69
   6   0   2  768.52   59.69
   6   0   2  675.53   56.79
   6   0   2  738.03   57.49
  -7   0  -2   21.60    7.20
   7   0   2   24.40    3.80
   7   0   2   20.20    2.80
  -8   0  -2  164.48   14.30
  -8   0  -2  215.98   19.00
   8   0   2  195.78   14.60
   8   0   2  180.78   15.40
  -9   0  -2    2.20    6.40
   9   0   2   -1.90    4.60
   9   0   2   -2.70    2.60
  10   0   2    4.90    2.80
  10   0   2   14.70    4.60
  11   0   2   40.00    4.30
  11  -1  -2    5.90    2.20
  11  -1  -2   11.20    3.70
  10  -1  -2  127.19   11.00
  10  -1  -2  114.09   10.00
   9  -1  -2   17.70    7.80
   9  -1  -2    9.20    3.10
   8  -1  -2   53.39    5.60
   8  -1  -2   55.49    7.00
  -8   1   2   43.10   10.80
   7  -1  -2   42.10    5.20
   7  -1  -2   42.60    4.60
  -7   1   2   39.10    5.40
  -7   1   2   40.90   10.10
   6  -1  -2   23.40    4.80
  -6   1   2   21.30    7.30
  -6   1   2   22.40    3.80
  -6   1   2   21.30    7.30
   5  -1  -2   68.09    8.00
   4  -1  -2   79.79    8.30
   3  -1  -2    2.00    3.00
  -3   1   2    2.10    1.70
  -3   1   2    3.90    3.30
   2  -1  -2 1373.96   98.69
  -2   1   2 1276.97   98.99
   1  -1  -2  133.59   10.50
   1  -1  -2  129.89   10.10
  -1   1   2  128.19   10.70
  -1   1   2  139.89   10.30
   0  -1  -2 1194.78   92.99
   0  -1  -2 1240.98   93.09
   0   1   2 1278.07   92.99
   0   1   2 1215.38   92.99
   0   1   2 1341.17   93.19
  -1  -1  -2  532.15   38.70
   1   1   2  503.85   38.70
   1   1   2  521.45   38.70
  -2  -1  -2    7.80    1.60
   2   1   2   10.20    2.00
  -3  -1  -2   90.09    7.30
  -4  -1  -2   55.09    7.10
   4   1   2   52.59    5.40
   5   1   2    1.30    2.40
   5   1   2    1.00    1.90
   5   1   2   -2.40    4.70
  -6  -1  -2  553.94   41.90
   6   1   2  468.85   38.70
   6   1   2  551.94   41.80
   6   1   2  511.75   39.60
  -7  -1  -2   30.00    7.40
   7   1   2   24.30    7.70
   7   1   2   35.20    5.10
   7   1   2   30.50    4.10
  -8  -1  -2  487.75   40.50
   8   1   2  503.95   37.50
   8   1   2  485.55   36.90
   9   1   2   22.80    3.50
  10   1   2   51.39    7.20
  10   1   2   40.00    5.70
  11   1   2    3.70    2.50
  11  -2  -2   10.70    3.70
  11  -2  -2    7.80    2.10
  10  -2  -2   89.79    8.90
  10  -2  -2   90.39    7.90
   9  -2  -2    3.90    2.90
  -9   2   2    3.30    6.80
   8  -2  -2   97.89    9.30
   8  -2  -2  106.79    8.80
  -8   2   2   93.99   14.00
   7  -2  -2    0.80    3.40
  -7   2   2   -4.10    6.90
   6  -2  -2  210.78   18.20
   6  -2  -2  266.67   19.80
  -6   2   2  262.57   22.90
  -6   2   2  207.38   18.30
  -5   2   2 -137.99  133.19
   4  -2  -2   17.10    3.90
   3  -2  -2   16.20    3.50
   2  -2  -2  213.78   17.40
  -2   2   2  227.98   18.00
   1  -2  -2   12.10    2.00
   1  -2  -2   12.60    2.30
  -1   2   2   12.60    3.00
  -1   2   2   14.80    2.00
   0  -2  -2  864.51   64.49
   0  -2  -2  825.02   64.39
   0   2   2  862.91   64.49
   0   2   2  915.01   64.69
  -1  -2  -2    0.20    1.10
   1   2   2    0.40    1.50
   1   2   2    0.00    1.50
  -2  -2  -2  192.08   14.30
   2   2   2  175.68   14.40
   2   2   2  198.08   14.40
   2   2   2  183.28   14.40
   3   2   2  360.26   27.20
  -4  -2  -2   88.29    8.70
   4   2   2   92.49    8.10
   5   2   2   72.69   10.10
   5   2   2   67.29    5.80
   5   2   2   64.69    6.90
  -6  -2  -2  150.88   12.20
   6   2   2  150.98   12.40
   6   2   2  109.99   20.00
   6   2   2  172.38   12.10
   6   2   2  145.59   12.90
  -7  -2  -2   62.69    7.00
   7   2   2   72.89    6.60
   7   2   2   76.49    7.90
   7   2   2   72.19    8.10
  -8  -2  -2  139.39   11.80
   8   2   2  139.09   12.70
   8   2   2  138.79   12.40
   9   2   2    0.30    2.90
   9   2   2    0.20    4.90
  10   2   2  112.59   11.10
  11   2   2    2.90    2.30
  11   2   2    1.10    4.10
  11  -3  -2   19.40    2.80
  11  -3  -2   31.10    4.90
  10  -3  -2   10.60    2.90
  10  -3  -2   18.60    4.10
   9  -3  -2    3.70    3.10
  -9   3   2    1.40    7.30
  -9   3   2    3.00    1.60
   8  -3  -2   28.10    4.20
  -8   3   2   21.50    8.60
  -8   3   2   24.40    2.90
  -7   3   2    2.60    9.20
  -7   3   2    2.40    2.20
  -7   3   2    3.90    2.80
  -6   3   2  193.68   15.70
  -6   3   2  193.18   21.80
  -6   3   2  195.78   15.30
   5  -3  -2   53.19    7.60
   4  -3  -2    5.80    3.50
   3  -3  -2   -1.50    3.40
   2  -3  -2  515.55   39.10
   1  -3  -2  374.66   30.00
  -1   3   2  421.76   31.20
   0  -3  -2  816.02   61.09
   0  -3  -2  770.92   60.89
   0   3   2  867.71   61.39
  -1  -3  -2    6.40    2.10
  -1  -3  -2    2.90    1.50
   1   3   2    3.80    1.90
  -2  -3  -2 1187.88   89.59
   2   3   2 1139.99   89.89
   2   3   2 1283.37   89.59
  -3  -3  -2  165.18   13.10
   3   3   2  173.98   13.00
   3   3   2  157.28   13.10
  -4  -3  -2   37.00    5.70
   4   3   2   41.90    5.00
  -5  -3  -2   44.20    7.30
   5   3   2   40.10    5.60
   5   3   2   47.20    4.60
  -6  -3  -2    6.40    3.30
   6   3   2   -5.30    6.90
   6   3   2    4.90    3.70
   6   3   2   -2.70    3.30
   6   3   2    3.50    2.60
  -7  -3  -2   23.40    3.90
   7   3   2   17.10    3.40
   7   3   2   16.40    4.80
  -8  -3  -2   19.00    4.40
   8   3   2   27.50    5.80
   8   3   2   16.40    3.80
   9   3   2    0.70    3.40
  10   3   2  252.17   20.10
  10   3   2  245.58   19.20
  11   3   2   17.50    4.40
  10  -4  -2   85.19    6.80
 -10   4   2   67.49   10.80
   9  -4  -2   46.80    6.20
   9  -4  -2   49.10    5.60
  -9   4   2   33.20    4.00
  -9   4   2   39.50    9.40
   8  -4  -2   43.20    6.00
  -8   4   2   31.70   10.80
  -8   4   2   38.20    4.40
   7  -4  -2   21.50    4.40
  -7   4   2   23.20    3.90
  -7   4   2   11.30   11.10
   6  -4  -2   50.39    6.00
  -6   4   2   65.99   15.80
  -6   4   2   62.29    6.50
  -6   4   2   62.59    6.30
   5  -4  -2   40.10    4.70
   5  -4  -2   47.50    7.60
  -5   4   2   56.99    5.90
   4  -4  -2   53.79    7.50
   3  -4  -2   14.60    3.80
   2  -4  -2   62.89    6.60
   1  -4  -2  721.83   54.49
   1  -4  -2  733.43   54.49
   0  -4  -2  456.75   36.70
   0  -4  -2  489.25   36.70
   0   4   2  517.35   37.50
  -1  -4  -2  177.38   14.00
  -2  -4  -2   78.99    7.10
  -3  -4  -2   61.69    6.30
   3   4   2   58.09    5.70
  -4  -4  -2  457.55   33.10
   4   4   2  387.96   30.90
   4   4   2  400.46   31.30
  -5  -4  -2   31.70    5.30
  -5  -4  -2   24.20    4.40
   5   4   2   30.10    4.20
   5   4   2   30.00    4.90
  -6  -4  -2   37.40    6.70
  -6  -4  -2   23.50    4.00
   6   4   2   34.80    4.90
   6   4   2   27.70    5.50
   6   4   2   21.90    4.10
  -7  -4  -2    5.90    3.50
   7   4   2    5.80    5.60
   7   4   2   -0.60    3.50
  -8  -4  -2  140.59   12.00
   8   4   2  132.69   13.60
   8   4   2  141.89   11.80
  -9  -4  -2   99.29   10.10
   9   4   2  104.29    8.70
   9   4   2   70.29   13.00
  10   4   2  148.59   12.80
  10   4   2  133.09   11.20
  11   4   2   13.30    2.20
  10  -5  -2    1.90    2.80
 -10   5   2    4.10    4.90
   9  -5  -2   42.60    5.60
  -9   5   2   40.40    9.20
  -9   5   2   29.50    3.60
   8  -5  -2  208.88   16.80
  -8   5   2  213.48   16.20
  -8   5   2  204.98   23.00
   7  -5  -2    8.70    3.80
  -7   5   2    1.00    3.00
  -7   5   2    1.90    2.40
  -7   5   2    2.40   11.60
  -6   5   2   46.90    5.90
  -6   5   2   37.90   12.30
  -6   5   2   46.90    5.90
   5  -5  -2   51.39    7.50
   5  -5  -2   41.20    4.90
  -5   5   2   49.80    6.00
   4  -5  -2   29.60    5.40
  -4   5   2   35.50    5.40
   3  -5  -2    2.00    3.10
   2  -5  -2    4.80    2.90
   2  -5  -2    6.60    2.90
   1  -5  -2   -0.60    2.10
   1  -5  -2   -0.20    4.20
  -1   5   2   -0.20    1.50
   0  -5  -2  342.97   26.60
   0  -5  -2  339.87   26.30
   0   5   2  356.86   26.40
  -1  -5  -2   28.80    5.30
   1   5   2   32.40    3.60
  -2  -5  -2  572.04   42.50
   2   5   2  553.64   42.00
  -3  -5  -2    4.70    2.90
   3   5   2    2.90    2.10
  -4  -5  -2   37.80    5.60
  -4  -5  -2   34.30    4.40
   4   5   2   32.90    4.80
   4   5   2   30.60    4.70
  -5  -5  -2   44.00    7.10
  -5  -5  -2   36.70    5.00
   5   5   2   27.70    6.90
   5   5   2   57.39    7.90
   5   5   2   41.40    4.90
   6   5   2   -1.00    4.90
   6   5   2    6.10    5.90
   6   5   2    3.40    2.90
  -7  -5  -2   23.70    4.50
   7   5   2   29.80    7.20
   7   5   2   21.00    4.10
  -8  -5  -2   52.89    6.90
   8   5   2   38.10    5.20
  -9  -5  -2   10.20    3.80
   9   5   2   12.50    3.60
  10   5   2   70.99    6.40
  10  -6  -2    2.90    1.80
 -10   6   2    0.80    3.50
   9  -6  -2   24.60    4.40
  -9   6   2   12.60    7.50
  -9   6   2   17.40    2.10
   8  -6  -2  236.68   18.70
  -8   6   2  253.37   25.20
  -8   6   2  238.98   18.50
  -7   6   2   57.99    6.40
  -7   6   2   48.40    5.60
  -7   6   2   41.40   14.50
   6  -6  -2  114.19   10.90
  -6   6   2  149.39   20.70
  -6   6   2  140.89   11.80
  -6   6   2  141.99   11.50
   5  -6  -2   27.20    4.30
  -5   6   2   29.00    5.60
  -5   6   2   28.70    4.40
   4  -6  -2   42.30    7.80
   4  -6  -2   38.80    4.90
   4  -6  -2   38.20    6.80
  -4   6   2   42.30    6.20
   3  -6  -2    2.10    3.60
   3  -6  -2    1.50    3.40
  -3   6   2    4.20    8.40
  -3   6   2   -0.10    3.20
   2  -6  -2   70.89    7.30
   2  -6  -2   68.19    8.00
  -2   6   2   81.99   17.40
  -2   6   2   70.79    6.50
  -2   6   2   73.89    8.90
   1  -6  -2  108.49    9.30
   1  -6  -2  106.69    9.80
  -1   6   2  102.79    8.60
  -1   6   2  113.59    8.90
   0  -6  -2  205.88   16.10
   0  -6  -2  213.48   16.70
   0   6   2  201.78   15.80
  -1  -6  -2   29.20    4.90
   1   6   2   26.10    3.60
  -2  -6  -2  646.54   47.80
   2   6   2  617.74   47.20
  -3  -6  -2    8.10    3.50
   3   6   2    9.80    2.50
  -4  -6  -2  192.58   15.60
  -4  -6  -2  180.58   14.70
   4   6   2  201.58   14.60
   4   6   2  163.08   18.20
  -5  -6  -2    9.70    4.30
   5   6   2   17.00    6.90
   5   6   2    2.50    3.20
  -6  -6  -2    5.70    4.30
   6   6   2    5.00    3.60
  -7  -6  -2   34.90    5.20
   7   6   2   25.50    4.60
  -8  -6  -2   12.60    4.30
   8   6   2   10.40    3.80
  -9  -6  -2    8.80    3.20
   9   6   2    5.60    3.10
  10   6   2   20.00    2.70
   9  -7  -2   48.40    4.50
  -9   7   2   50.69    8.50
  -9   7   2   45.90    4.10
   8  -7  -2    0.60    2.80
  -8   7   2    0.60    8.70
  -8   7   2    4.30    1.70
   7  -7  -2   10.10    3.50
  -7   7   2    3.80    2.20
  -7   7   2    0.30    2.70
  -7   7   2    3.90   10.70
  -6   7   2  147.69   12.00
  -6   7   2  136.09   12.60
  -6   7   2  147.99   21.60
   5  -7  -2   -0.50    2.70
  -5   7   2    3.00    3.30
  -5   7   2   -1.60    3.10
  -5   7   2   -1.90    9.30
  -4   7   2  305.27   24.30
  -4   7   2  294.07   23.80
   3  -7  -2    5.90    3.80
  -3   7   2    1.00    4.00
  -3   7   2   -2.50    8.60
   2  -7  -2   17.60    3.40
   2  -7  -2   20.80    5.10
  -2   7   2    3.40   11.10
  -2   7   2   17.70    2.80
   1  -7  -2   76.89    8.40
   1  -7  -2   80.69    7.40
  -1   7   2   79.79   10.30
  -1   7   2   99.49   21.90
  -1   7   2   78.79    7.00
   0  -7  -2   20.20    3.70
   0   7   2   14.70    5.50
   0   7   2   23.80    2.80
   0   7   2   17.90   14.70
  -1  -7  -2   -0.40    3.60
   1   7   2   -1.80   14.10
   1   7   2   -2.40    5.10
   1   7   2    5.20    2.30
  -2  -7  -2  252.07   19.50
  -2  -7  -2  227.58   18.60
   2   7   2  242.48   18.60
   2   7   2  253.77   21.90
  -3  -7  -2   21.70    3.70
   3   7   2    9.20    5.40
   3   7   2   13.30    2.80
  -4  -7  -2  242.98   18.80
   4   7   2  229.28   18.40
  -5  -7  -2    1.70    3.80
   5   7   2   -0.40    3.50
  -6  -7  -2   31.10    5.00
   7   7   2   -2.60    3.70
  -8  -7  -2    1.90    3.30
   8   7   2    6.00    3.40
  -9  -7  -2    3.10    2.50
   9   7   2    0.40    2.60
  -8   8   2    3.30    1.20
  -8   8   2    1.80    6.70
  -7   8   2   12.80   10.20
  -7   8   2   24.50    2.80
  -6   8   2  151.08   11.80
  -6   8   2  140.49   12.60
  -6   8   2  136.79   21.40
  -5   8   2   12.30    4.90
  -5   8   2    7.70    5.40
  -5   8   2   -4.30   18.50
  -4   8   2  115.29   11.30
  -4   8   2  116.19   10.90
  -3   8   2   -1.20    3.70
  -3   8   2    1.00    4.10
  -3   8   2    0.30    8.80
  -2   8   2   13.70    2.50
  -2   8   2    7.30   10.90
  -2   8   2   10.20    5.10
  -2   8   2   10.40    3.90
  -1   8   2    7.60    2.40
  -1   8   2   14.20   13.50
  -1   8   2    5.80    4.30
   0   8   2    0.00    2.20
   0   8   2   -1.10    3.90
   0   8   2    0.20   13.00
   0   8   2   -1.20    2.40
  -1  -8  -2  108.29    9.60
   1   8   2   91.39   24.90
   1   8   2  115.79    9.10
   1   8   2  105.09   12.00
  -2  -8  -2  324.87   25.30
   2   8   2  354.86   25.40
   2   8   2  330.47   27.80
   2   8   2  312.07   37.70
  -3  -8  -2  343.27   27.40
   3   8   2  367.06   27.30
   3   8   2  378.86   40.90
  -4  -8  -2  104.89    9.30
   4   8   2  107.39   28.30
   4   8   2   99.09    9.30
  -5  -8  -2   50.79    7.20
   5   8   2   45.60    6.30
  -6  -8  -2  102.59    9.30
  -7  -8  -2    4.60    3.40
   7   8   2   -0.10    3.10
  -8  -8  -2    1.00    2.70
   8   8   2    0.80    2.50
  -7   9   2    2.00    7.30
  -7   9   2    4.40    1.40
  -6   9   2   29.00    3.70
  -6   9   2   26.70    4.10
  -5   9   2   52.19    5.50
  -5   9   2   46.60    6.40
  -4   9   2  451.55   34.50
  -4   9   2  454.55   35.10
  -3   9   2   34.30    6.30
  -3   9   2   35.00    4.50
  -2   9   2   87.89    9.70
  -2   9   2   85.69    7.40
  -2   9   2   74.89    8.10
  -1   9   2   64.39    7.10
  -1   9   2   50.59   13.90
  -1   9   2   76.19    9.00
  -1   9   2   78.59    6.50
   0   9   2    2.20    3.90
   0   9   2    3.10    2.20
   0   9   2    2.50    2.00
   0   9   2    3.60   13.30
  -1  -9  -2    8.40    3.40
   1   9   2    1.80    2.80
   1   9   2    1.60   13.50
   1   9   2    2.80    2.80
  -2  -9  -2    7.40    3.70
   2   9   2   -0.70   14.60
   2   9   2    6.70    2.90
   3   9   2  123.09   25.70
   3   9   2  168.28   12.70
  -4  -9  -2  144.79   12.20
   4   9   2  136.89   11.90
  -5  -9  -2    9.00    3.80
   5   9   2    3.70    3.80
   5   9   2   -0.10   16.20
  -6  -9  -2  231.88   16.40
   6   9   2  183.38   16.40
  -7  -9  -2    5.80    2.80
   7   9   2    2.00    3.60
   7   9   2    2.40   11.90
  -6  10   2    3.70    1.20
  -6  10   2    1.30    6.20
  -5  10   2   17.60    3.30
  -5  10   2    6.60    8.30
  -5  10   2   17.70    2.20
  -4  10   2   99.09    9.60
  -4  10   2   86.79    7.80
  -3  10   2   14.40    3.50
  -3  10   2   17.90    2.50
  -2  10   2   84.19    8.30
  -2  10   2   89.89    7.40
  -1  10   2    0.80    8.70
  -1  10   2    0.50    2.40
  -1  10   2   -1.30    2.00
  -1  10   2   -0.80    1.50
   0  10   2   45.10   12.60
   1  10   2   -6.50   11.90
  -2 -10  -2    7.20    3.30
   2  10   2    8.00   13.00
  -3 -10  -2    2.50    3.30
   3  10   2   -0.70   13.30
   3  10   2    0.80    2.90
  -4 -10  -2   20.20    5.10
   4  10   2    6.10   14.00
  -5 -10  -2   11.00    3.20
   5  10   2  -11.10   11.90
   5  10   2   10.10    2.70
  -6 -10  -2   44.40    4.60
   6  10   2   42.00    4.40
  -4  11   2    4.00    6.20
  -3  11   2    2.40    6.20
  -1  11   2   11.60    8.10
   0  11   2   50.09    4.70
   2  11   2   -0.90    9.90
   3  11   2   -1.40    9.90
   4  11   2    1.30    9.50
   3  10  -3   -1.30    5.50
   2  10  -3    3.30    6.60
   1  10  -3    5.50    7.00
   0  10  -3    2.50    4.10
   0  10  -3    0.10    6.20
  -1  10  -3    3.20    5.80
  -2  10  -3   30.50    7.00
  -3  10  -3    9.70    7.00
  -4  10  -3  196.18   18.70
   5   9  -3   -3.00    7.30
   4   9  -3   85.19   16.40
   3   9  -3    4.10   11.40
   2   9  -3    7.20   12.20
   2   9  -3   17.00    3.80
   1   9  -3    2.90   12.00
   1   9  -3   22.50    4.00
   0   9  -3   20.00   10.40
   0   9  -3   12.40    3.90
  -1   9  -3    7.30    9.10
  -2   9  -3   38.90    8.50
  -3   9  -3   57.09    4.30
  -3   9  -3   40.60   10.40
  -4   9  -3  188.78   19.60
  -4   9  -3  185.08   14.10
  -5   9  -3    9.70    1.30
  -5   9  -3    9.90    7.90
  -6   9  -3  181.38   18.30
  -6   9  -3  186.08   13.90
   7   8  -3    0.30    5.80
   6   8  -3    9.70    9.80
   5   8  -3    4.50   11.50
   4   8  -3   84.79   17.80
   3   8  -3   -0.90   15.30
   2   8  -3   60.49   23.60
   1   8  -3   61.09    7.40
   1   8  -3   37.10   16.30
   0   8  -3    0.60   13.40
  -1   8  -3    8.30   10.60
  -2   8  -3    1.10    8.20
  -3   8  -3    4.00    1.30
  -3   8  -3    1.00    6.60
  -4   8  -3   56.19   11.70
  -4   8  -3   50.69    4.50
  -5   8  -3   22.40    2.80
  -5   8  -3   34.70    9.30
  -6   8  -3  233.68   22.60
  -6   8  -3  211.18   16.70
  -7   8  -3    0.50    1.10
  -7   8  -3    2.70    6.40
   8   7  -3   -2.80    5.90
  -8  -7   3    4.30    2.40
   7   7  -3    2.30    9.30
  -7  -7   3    5.60    3.30
   6   7  -3    8.10   12.40
  -6  -7   3   12.90    4.30
   5   7  -3   25.70   15.40
  -5  -7   3   10.30    4.60
   4   7  -3   57.69    6.30
   4   7  -3   62.39   18.70
   3   7  -3    7.50   16.60
   3   7  -3    4.50    4.10
   3   7  -3    3.20    2.30
   3   7  -3    5.50    3.30
   2   7  -3  148.79   11.70
   2   7  -3  105.89   22.40
   1   7  -3   48.90    6.30
   1   7  -3   17.60   16.40
   0   7  -3  102.59    9.60
   0   7  -3   87.29   22.00
  -1   7  -3   58.09    7.20
  -1   7  -3   52.89   14.20
  -2   7  -3    1.70    8.40
  -3   7  -3  178.98   14.80
  -3   7  -3  213.68   19.70
  -4   7  -3  283.27   23.40
  -4   7  -3  230.98   19.30
  -5   7  -3    3.90   10.70
  -5   7  -3    3.50    2.80
  -6   7  -3  144.09   11.60
  -6   7  -3  155.68   18.60
  -7   7  -3    7.80    8.70
  -7   7  -3   10.60    1.80
  -8   7  -3   24.70    2.70
  -9  -6   3   11.30    2.80
  -8  -6   3   48.70    6.10
   7   6  -3    4.10    2.40
  -7  -6   3    3.00    4.10
   6   6  -3    2.10    2.90
   5   6  -3    4.50    3.20
   5   6  -3    5.00    4.10
  -5  -6   3    9.00    4.60
   4   6  -3    2.30    5.70
   4   6  -3    6.20    3.70
  -4  -6   3   15.00    4.20
   3   6  -3    2.40    3.70
   3   6  -3    3.40    2.90
   3   6  -3   10.80   25.30
   3   6  -3    2.70    3.20
   2   6  -3  370.96   29.30
   2   6  -3  396.16   40.50
   2   6  -3  402.36   29.70
   1   6  -3   39.90    4.40
   1   6  -3   36.60    5.20
   1   6  -3   34.10    4.10
   1   6  -3   30.40   15.40
  -1  -6   3   36.50    5.80
   0   6  -3  409.86   31.60
   0   6  -3  398.46   39.40
   0   6  -3  443.26   31.80
  -1   6  -3    9.20    1.40
  -1   6  -3    8.90    2.00
  -1   6  -3   21.00    3.50
  -1   6  -3   12.40   11.00
  -2   6  -3   34.40    3.30
  -2   6  -3   33.60    3.80
  -2   6  -3   46.10   10.40
  -3   6  -3    8.70    6.70
  -3   6  -3    4.60    1.40
  -3   6  -3    7.40    1.60
  -4   6  -3   33.20    3.60
  -4   6  -3   30.60    3.50
  -4   6  -3   39.20    9.10
  -5   6  -3  124.69   10.40
  -5   6  -3  150.98   16.70
  -5   6  -3  125.99   10.30
  -6   6  -3  139.49   11.40
  -6   6  -3  148.59   11.30
  -7   6  -3    8.40    1.60
  -7   6  -3    3.20    9.10
  -7   6  -3    3.20    1.70
  -8   6  -3   26.60    2.80
  -8   6  -3   12.90    8.60
   8  -6   3   26.70    3.00
  -9   6  -3    3.10    5.20
  -9   6  -3    2.20    1.10
  -9  -5   3   20.70    3.60
   8   5  -3   61.99    7.20
  -8  -5   3   94.19    7.80
   7   5  -3    2.20    3.30
   6   5  -3   23.30    4.30
  -6  -5   3   34.50    5.40
   5   5  -3    5.40    3.90
   5   5  -3    5.00    3.50
  -5  -5   3    5.30    4.20
   4   5  -3    5.60    3.50
   4   5  -3    3.00    3.30
  -3  -5   3   10.00    3.40
   2   5  -3  154.78   12.90
   2   5  -3  187.48   13.00
   2   5  -3  146.49   12.60
  -2  -5   3  162.88   13.50
   1   5  -3    8.70    1.80
   1   5  -3   22.60   12.80
  -1  -5   3    2.60    2.80
   0   5  -3  591.74   44.20
  -1   5  -3   18.30    3.00
  -2   5  -3   58.39    4.80
  -3   5  -3   25.20    2.90
   3  -5   3   42.30    6.80
  -4   5  -3  532.35   40.10
  -4   5  -3  530.95   40.10
  -4   5  -3  572.24   42.60
   4  -5   3  505.55   43.30
  -5   5  -3 1133.29   85.69
  -5   5  -3 1171.88   85.79
  -6   5  -3  137.99   11.00
  -6   5  -3  137.99   10.90
  -7   5  -3   11.20    9.70
  -7   5  -3   11.30    2.40
  -7   5  -3   10.00    1.80
  -8   5  -3  109.59    9.00
  -8   5  -3  119.29    9.30
  -9   5  -3    1.50    5.80
  -9   5  -3    1.00    1.20
  -9   5  -3    1.90    1.60
   9  -5   3    1.10    1.60
 -10   5  -3   41.10    6.80
 -10   5  -3   53.99    4.00
 -10  -4   3    9.60    2.70
   9   4  -3   17.50    3.30
  -9  -4   3   28.30    5.20
  -8  -4   3  244.08   19.30
   7   4  -3   47.40    6.10
  -7  -4   3   61.99    7.30
   6   4  -3   11.40    4.60
   6   4  -3   11.10    3.30
   5   4  -3    4.10    3.70
   5   4  -3    5.60    2.90
  -5  -4   3   17.00    4.50
   4   4  -3   20.30    3.00
   4   4  -3   18.80    3.80
  -4  -4   3   31.40    7.00
   3   4  -3    1.80    2.10
   3   4  -3    1.90    3.00
   3   4  -3    2.70    2.20
  -3  -4   3    2.10    2.30
   2   4  -3  230.48   19.20
  -2  -4   3  279.67   19.80
  -1  -4   3   10.80    2.50
   0  -4   3  558.04   42.00
   2  -4   3  307.37   25.20
   3  -4   3   98.19   12.00
  -4   4  -3   19.50    2.60
  -4   4  -3   19.00    2.60
  -4   4  -3   22.80    5.60
   4  -4   3   17.30    6.50
  -5   4  -3    3.30    6.20
  -5   4  -3    3.60    1.30
  -5   4  -3    3.90    1.60
  -6   4  -3   31.50    3.80
  -7   4  -3   71.29    6.00
  -7   4  -3   70.79    6.50
  -8   4  -3  891.91   58.69
   8  -4   3  681.83   58.29
  -9   4  -3    0.30    1.20
  -9   4  -3   -0.20    6.30
  -9   4  -3    0.60    1.90
   9  -4   3   -0.50    1.80
 -10   4  -3  181.48   16.30
 -10   4  -3  198.18   13.70
 -10   4  -3  155.98   13.90
  10  -4   3  189.68   13.80
  10   3  -3   20.60    2.60
   9   3  -3    1.30    2.70
  -9  -3   3    4.30    4.00
   8   3  -3   79.59    7.70
   7   3  -3   10.60    4.40
   6   3  -3    8.80    3.50
   5   3  -3  115.39    9.60
   5   3  -3   73.49   10.20
  -5  -3   3   98.09    9.00
   4   3  -3    6.90    2.90
   4   3  -3   14.60    2.60
  -4  -3   3    5.70    2.80
  -3  -3   3    5.70    2.30
  -2  -3   3  601.94   45.20
  -1  -3   3   24.50    3.50
   2  -3   3  298.87   24.50
   3  -3   3  172.48   16.60
   4  -3   3   18.20    7.40
  -5   3  -3   -0.70    1.70
  -5   3  -3    0.90    5.70
  -5   3  -3    1.10    1.20
   5  -3   3    4.70    5.60
  -6   3  -3   75.09    6.20
  -6   3  -3   78.29    6.80
   6  -3   3   64.79   11.00
  -7   3  -3   63.89    5.10
  -7   3  -3   62.99    6.10
  -7   3  -3   39.60   11.90
  -8   3  -3  233.78   16.50
  -8   3  -3  229.28   17.20
   8  -3   3  191.98   16.70
  -9   3  -3    7.90    6.80
  -9   3  -3    2.50    2.70
  -9   3  -3    6.80    1.50
   9  -3   3    8.20    2.20
 -10   3  -3  144.99   14.90
 -10   3  -3  160.68   11.70
  10  -3   3  154.18   11.90
 -11   3  -3    1.60    1.20
  11  -3   3    4.30    2.00
   9   2  -3   -1.20    3.50
  -9  -2   3    1.10    4.10
   8   2  -3  110.69   10.10
  -8  -2   3  122.89   10.90
   7   2  -3    9.70    3.20
  -7  -2   3   15.50    4.50
   6   2  -3   52.99    5.40
   6   2  -3   45.80    7.10
  -6  -2   3   50.19    6.30
   5   2  -3  107.99    9.90
   5   2  -3  113.29    8.50
  -5  -2   3  103.69    9.40
  -5  -2   3   86.79   11.00
   4   2  -3   -3.60    2.10
  -4  -2   3   -0.80    2.70
  -3  -2   3   59.79    5.90
  -2  -2   3  827.42   61.69
  -1  -2   3   42.70    4.20
   0   2  -3  422.96   66.69
   0   2  -3  355.66   62.59
   2  -2   3  919.41   68.49
   3  -2   3  138.49   11.10
   4  -2   3  201.78   18.50
   5  -2   3  280.97   24.70
  -6   2  -3   14.60    1.80
  -6   2  -3    5.40    8.60
   6  -2   3   12.30    7.00
  -7   2  -3   89.09    6.80
   7  -2   3   78.29    8.00
  -8   2  -3   77.89    6.40
  -8   2  -3   87.09   13.50
   8  -2   3   79.19    7.20
   8  -2   3   78.59    8.60
  -9   2  -3   27.30    3.10
  -9   2  -3   21.90    7.70
  -9   2  -3   25.60    4.30
   9  -2   3   34.10    4.00
   9  -2   3   34.90    5.90
 -10   2  -3   94.69    7.50
 -10   2  -3   71.59    7.70
 -10   2  -3   89.29   11.20
  10  -2   3   92.39    7.30
  10  -2   3   85.99    8.70
 -11   2  -3    0.90    1.40
  11  -2   3    8.40    3.10
  11  -2   3    4.60    1.60
  10   1  -3   39.20    4.90
   9   1  -3   10.50    5.10
   9   1  -3    1.10    3.00
  -9  -1   3   11.60    5.70
   8   1  -3  108.99   10.20
   8   1  -3   94.59    8.80
   7   1  -3   14.60    3.30
  -7  -1   3   18.60    4.20
   6   1  -3   37.10    5.20
   6   1  -3   42.70    4.50
  -6  -1   3   31.40    5.50
   5   1  -3   29.10    4.10
  -5  -1   3   32.90    4.60
  -5  -1   3   24.70    4.10
  -4  -1   3  156.48   12.40
  -3  -1   3   -1.00    1.50
  -2  -1   3    2.30    1.40
   1   1  -3  326.47   25.10
  -1  -1   3  335.77   25.40
   0  -1   3  315.67   23.80
   1  -1   3  251.47   19.00
   2  -1   3  516.65   38.70
   3  -1   3  440.86   33.20
   4  -1   3    9.60    2.50
   5  -1   3  209.78   17.40
   5  -1   3  237.68   20.50
  -6   1  -3    5.70    1.30
  -6   1  -3    3.90    7.70
   6  -1   3    6.90    1.80
   6  -1   3   16.70    7.40
  -7   1  -3  103.29   15.10
  -7   1  -3  139.49    9.70
   7  -1   3  132.39   11.30
   7  -1   3  122.39    9.90
   7  -1   3  121.99   10.80
  -8   1  -3  222.38   21.00
  -8   1  -3  213.78   16.30
   8  -1   3  207.68   17.50
  -9   1  -3    4.90    2.00
  -9   1  -3    7.10    6.20
   9  -1   3   11.50    5.10
   9  -1   3   10.90    2.60
 -10   1  -3    5.80    2.60
 -10   1  -3    5.50    3.20
  10  -1   3   14.30    2.60
  10  -1   3   16.60    4.60
  11  -1   3    9.70    2.50
  11  -1   3   13.60    3.60
  11   0  -3    1.30    2.20
  10   0  -3    6.30    4.40
  10   0  -3    7.20    2.70
   9   0  -3   42.00    5.40
   8   0  -3  139.79   12.20
   8   0  -3  136.39   11.70
   7   0  -3   -1.30    2.60
   7   0  -3   -2.60    8.10
   6   0  -3  168.88   14.40
   6   0  -3  162.78   13.50
   6   0  -3  187.08   13.20
  -6   0   3  164.78   13.80
   5   0  -3    0.30    2.90
   5   0  -3    4.20    2.10
   4   0  -3  532.65   40.40
  -4   0   3  535.05   40.10
  -3   0   3  159.78   11.80
  -3   0   3  137.59   12.80
   2   0  -3  239.28   18.70
   2   0  -3  235.98   18.60
  -2   0   3  252.57   19.20
  -2   0   3  247.48   18.50
   1   0  -3 2410.96  182.38
   1   0  -3 2419.06  182.48
  -1   0   3 2573.54  182.58
  -1   0   3 2433.56  182.38
   0   0   3   71.59    6.20
   1   0   3   22.70    3.30
   2   0   3  635.54   47.50
   3   0   3    3.90    2.00
   4   0   3 1491.15  110.99
   5   0   3    2.70    5.40
   5   0   3    9.20    2.70
  -6   0  -3  106.79   12.50
   6   0   3   80.49    7.20
   6   0   3   88.19    8.60
   6   0   3   95.29   13.30
  -7   0  -3   15.00    2.20
  -7   0  -3   24.10    7.00
   7   0   3   11.20    8.10
   7   0   3   23.60    4.10
   7   0   3   19.10    2.60
   7   0   3   23.10    4.40
  -8   0  -3   35.40    4.10
  -8   0  -3   49.50   10.00
   8   0   3   48.40    4.80
   8   0   3   52.09    7.20
  -9   0  -3    1.40    6.00
  -9   0  -3   -1.30    1.50
   9   0   3    0.00    2.60
   9   0   3   -3.30    4.70
  10   0   3   11.30    2.70
  10   0   3    8.40    4.70
 -11   0  -3    6.40    2.20
  11   0   3   20.00    4.00
  11   0   3   12.90    2.40
  11  -1  -3   -0.20    1.80
  11  -1  -3    2.20    3.00
  10  -1  -3    3.60    4.20
  10  -1  -3    4.30    2.60
   9  -1  -3   10.70    3.20
   9  -1  -3    9.90    5.50
   8  -1  -3   60.69    6.70
   8  -1  -3   56.89    7.60
   7  -1  -3    2.10    2.70
  -7   1   3   -0.70    5.60
   6  -1  -3  664.83   50.19
   6  -1  -3  663.13   50.99
  -6   1   3  692.83   52.29
  -6   1   3  661.63   50.19
   5  -1  -3    4.30    3.70
   4  -1  -3  944.71   70.89
   3  -1  -3   39.50    5.00
  -3   1   3   28.80    4.30
   2  -1  -3   40.60    4.70
   2  -1  -3   34.90    3.60
  -2   1   3   33.40    5.50
  -2   1   3   33.10    4.10
   1  -1  -3   16.00    2.30
   1  -1  -3   17.10    2.70
  -1   1   3   15.30    2.10
  -1   1   3   17.80    3.00
   0  -1  -3  194.38   15.10
   0   1   3  189.98   15.00
   0   1   3  205.48   15.30
   1   1   3   83.19    6.90
   1   1   3   85.59    7.00
  -2  -1  -3 1950.20  139.59
   2   1   3 1808.92  139.49
   3   1   3   15.70    2.60
   4   1   3 1273.07   94.79
   5   1   3    1.40    2.60
   5   1   3    0.70    1.50
   6   1   3  291.67   21.90
   6   1   3  284.17   21.00
   6   1   3  300.27   25.10
   6   1   3  247.18   21.40
  -7  -1  -3   42.70    9.40
   7   1   3   36.50    4.20
   7   1   3   48.00    6.80
   7   1   3   27.00    9.40
   7   1   3   32.30    6.10
  -8  -1  -3    0.30    1.80
   8   1   3    6.30    2.80
   8   1   3    7.20    4.60
   9   1   3   50.59    5.50
   9   1   3   51.39    7.80
  10   1   3   24.50    5.40
  10   1   3   19.00    3.40
 -11  -1  -3    2.50    2.00
  11   1   3    6.10    5.00
  11   1   3    1.10    2.20
  11  -2  -3    0.90    1.80
  11  -2  -3    0.00    3.00
  10  -2  -3    6.70    4.10
  10  -2  -3    4.40    2.70
   9  -2  -3    1.20    2.80
   8  -2  -3    3.10    3.90
   8  -2  -3    0.50    3.00
  -8   2   3    5.10    6.90
   7  -2  -3    7.50    3.80
  -7   2   3   -1.10    7.00
   6  -2  -3  793.82   61.09
   6  -2  -3  850.21   62.19
  -6   2   3  767.62   61.09
  -6   2   3  866.31   61.39
   5  -2  -3    6.00    2.80
   5  -2  -3    3.60    3.80
   4  -2  -3 1733.53  129.39
   3  -2  -3    7.00    3.00
   2  -2  -3   47.80    5.50
  -2   2   3   51.19    5.40
   1  -2  -3  945.51   70.19
   1  -2  -3  868.01   69.89
  -1   2   3  935.81   70.49
  -1   2   3 1010.90   70.09
   0  -2  -3    6.10    1.20
   0  -2  -3    4.50    1.70
   0   2   3    4.30    2.10
   0   2   3    5.60    1.70
   0   2   3    6.00    1.40
   1   2   3  128.89   10.30
   1   2   3  127.39   10.10
  -2  -2  -3  229.68   17.20
   2   2   3  216.08   17.40
   2   2   3  235.18   17.70
   3   2   3  101.29    8.60
  -4  -2  -3 1518.55  112.19
   4   2   3 1492.25  112.09
  -5  -2  -3   28.60    4.90
   5   2   3   14.60    3.70
   5   2   3   19.40    2.40
  -6  -2  -3  337.37   27.20
   6   2   3  376.06   30.50
   6   2   3  372.76   28.00
   7   2   3  163.98   14.10
   7   2   3  133.49   18.80
   7   2   3  189.48   13.20
   8   2   3    2.20    4.60
   9   2   3   17.80    5.60
   9   2   3    7.40    3.00
  10   2   3   14.70    5.20
  10   2   3   14.50    3.20
 -11  -2  -3    0.40    1.80
  11   2   3    1.20    3.90
  11   2   3    3.60    2.40
  10  -3  -3    7.80    2.70
  10  -3  -3    7.70    3.80
   9  -3  -3    9.70    3.20
   9  -3  -3   18.30    4.70
  -9   3   3    7.20    7.00
   8  -3  -3    3.40    3.70
  -8   3   3    3.90    2.00
  -8   3   3    2.90    7.40
   7  -3  -3   31.00    4.70
  -7   3   3   20.40    3.80
  -7   3   3   12.10    8.50
   6  -3  -3  310.37   23.20
   6  -3  -3  312.97   24.50
  -6   3   3  291.47   23.70
  -6   3   3  299.47   23.40
   5  -3  -3   19.20    4.70
   5  -3  -3   18.10    3.10
   4  -3  -3 1390.16  105.79
   3  -3  -3    7.40    3.10
   2  -3  -3  571.54   43.30
  -2   3   3  574.14   43.10
   1  -3  -3  848.02   65.19
  -1   3   3  898.41   65.19
   0  -3  -3   56.69    5.30
   0   3   3   60.79    6.10
  -1  -3  -3   32.80    3.90
   1   3   3   42.70    4.50
  -2  -3  -3  600.14   46.10
   2   3   3  620.04   46.40
   2   3   3  630.94   46.20
   3   3   3    0.20    2.20
  -4  -3  -3  648.04   50.19
   4   3   3  685.83   50.19
  -5  -3  -3   75.69    9.50
   5   3   3   83.29    7.00
   5   3   3   94.69    8.20
  -6  -3  -3  285.27   22.40
  -6  -3  -3  295.07   23.80
   6   3   3  284.67   25.50
   6   3   3  257.67   22.80
   6   3   3  312.47   22.20
   6   3   3  329.37   23.50
  -7  -3  -3  116.49   10.50
   7   3   3  105.19   16.80
   7   3   3  123.69    9.80
  -8  -3  -3   21.30    4.90
   8   3   3   24.00    5.60
   9   3   3  114.49    9.90
  10   3   3  137.89   11.30
  10   3   3  144.49   12.90
 -11  -3  -3    4.00    1.50
  11   3   3    0.90    1.80
  11   3   3    4.90    4.00
  10  -4  -3  145.89   11.80
  10  -4  -3  139.89   11.20
   9  -4  -3   16.50    4.30
   9  -4  -3   12.10    3.40
  -9   4   3    5.00    6.60
  -9   4   3    7.80    2.70
   8  -4  -3    8.90    5.80
  -8   4   3   -1.80    3.70
  -8   4   3    6.40   15.70
   7  -4  -3    1.20    4.10
  -7   4   3   -1.50    9.40
  -7   4   3    4.50    2.80
  -7   4   3    2.20    3.30
   6  -4  -3  115.89    9.80
  -6   4   3  119.29   10.50
  -6   4   3  101.89   10.20
  -6   4   3  122.29   17.50
   5  -4  -3   29.70    4.10
   5  -4  -3   24.30    5.50
  -5   4   3   25.10   11.10
  -5   4   3   29.90    5.20
   4  -4  -3   82.19    8.60
  -4   4   3   74.09    9.00
   3  -4  -3   53.39    6.60
   2  -4  -3 1545.15  115.29
   1  -4  -3    3.40    2.10
   1  -4  -3    3.80    2.10
   0  -4  -3   45.40    4.70
  -1  -4  -3  270.27   20.70
  -2  -4  -3  186.18   14.40
   2   4   3  180.98   14.40
  -3  -4  -3  680.13   52.89
   3   4   3  702.63   52.69
   3   4   3  733.83   52.89
  -4  -4  -3  328.47   25.60
   4   4   3  332.87   24.80
  -5  -4  -3   13.60    4.50
   5   4   3   24.30    3.80
  -6  -4  -3  351.76   28.70
  -6  -4  -3  349.77   27.10
   6   4   3  343.47   27.60
   6   4   3  378.16   27.00
   6   4   3  355.96   27.80
  -7  -4  -3   11.60    4.30
   7   4   3    3.70    3.20
   7   4   3   13.00    5.50
  -8  -4  -3  189.38   15.30
   8   4   3  183.08   16.30
   8   4   3  187.58   14.90
   9   4   3  185.18   18.00
   9   4   3  208.58   15.50
  10   4   3    4.10    2.50
  10   4   3    9.80    5.20
 -11  -4  -3    5.50    1.20
  10  -5  -3   14.70    2.40
  10  -5  -3   15.40    3.30
   9  -5  -3   44.40    4.60
   9  -5  -3   45.40    5.80
  -9   5   3   26.10   10.90
  -9   5   3   34.10    3.80
  -8   5   3    2.40    2.20
  -8   5   3   -0.90    8.00
   7  -5  -3    2.50    3.90
  -7   5   3    3.50   10.20
  -7   5   3   -2.50    2.60
  -7   5   3    0.80    3.30
   6  -5  -3   30.10    4.90
  -6   5   3   18.80    4.00
  -6   5   3   16.00    4.00
  -6   5   3   25.20   11.30
   5  -5  -3   11.40    3.10
  -5   5   3    6.10    3.50
  -5   5   3    2.70    8.70
   4  -5  -3  221.88   18.50
  -4   5   3  222.08   18.70
   3  -5  -3   60.89    7.00
   3  -5  -3   55.29    7.50
  -3   5   3   47.30    7.20
   2  -5  -3 1058.39   79.89
   1  -5  -3   71.19    7.40
   1  -5  -3   74.09    7.00
  -1   5   3   76.59    6.20
   0  -5  -3  405.66   30.90
   0  -5  -3  409.16   30.70
   0   5   3  403.36   30.40
  -1  -5  -3   81.89    7.30
   1   5   3   75.09    6.50
  -2  -5  -3   38.90    5.00
   2   5   3   40.70    4.20
  -3  -5  -3   40.90    5.70
   3   5   3   53.89    4.80
  -4  -5  -3  111.79   10.30
   4   5   3  120.99   11.00
   4   5   3   94.69   15.40
   4   5   3  128.39   10.20
  -5  -5  -3   -5.10    3.20
  -5  -5  -3   -2.50    3.70
   5   5   3    2.30    5.70
   5   5   3    0.40    2.80
   5   5   3    3.50    2.40
   5   5   3    5.70    5.00
   6   5   3   50.59    5.50
   6   5   3   41.40    8.20
  -7  -5  -3    5.80    4.10
   7   5   3   10.30    6.60
   7   5   3    2.50    4.00
   7   5   3    1.40    5.90
   8   5   3   87.39    8.00
  -9  -5  -3   15.70    3.60
   9   5   3    8.30    3.00
 -10  -5  -3   -0.30    1.40
  10   5   3    0.90    2.30
   9  -6  -3   14.10    2.70
   9  -6  -3   14.10    3.40
  -9   6   3    7.80    5.20
   8  -6  -3  151.68   12.30
  -8   6   3  157.08   17.80
  -8   6   3  137.99   11.80
   7  -6  -3   10.50    4.70
  -7   6   3    8.60    2.90
  -7   6   3    9.50    3.80
  -7   6   3    5.10   10.40
  -6   6   3    6.60    3.50
  -6   6   3   -1.20   10.80
  -6   6   3    9.20    3.50
   5  -6  -3   13.40    3.80
  -5   6   3   -5.80    9.00
  -5   6   3    9.70    3.80
   4  -6  -3    5.40    3.30
  -4   6   3    8.20    4.00
  -4   6   3    0.40    6.80
   3  -6  -3    1.50    3.20
  -3   6   3    1.10    3.50
  -3   6   3   -2.90    6.60
  -3   6   3    0.00    2.10
   2  -6  -3  520.05   39.50
   2  -6  -3  504.65   39.20
  -2   6   3  461.85   43.80
  -2   6   3  574.04   41.20
   1  -6  -3   40.10    5.40
   1  -6  -3   35.60    4.80
  -1   6   3   31.80    3.80
  -1   6   3   32.30    6.40
   0  -6  -3  656.03   48.20
   0  -6  -3  625.74   48.30
   0   6   3  628.44   47.70
   0   6   3  649.64   47.80
  -1  -6  -3   48.20    5.80
   1   6   3   50.19    4.80
  -2  -6  -3   10.00    2.90
  -2  -6  -3    7.20    2.60
   2   6   3    5.20    6.80
  -3  -6  -3  111.29   10.40
  -3  -6  -3  109.29    9.70
   3   6   3  130.79    9.60
   3   6   3  121.99   14.40
  -4  -6  -3   33.60    5.60
  -4  -6  -3   35.80    5.00
   4   6   3   31.50    4.60
   4   6   3   23.30    7.90
   5   6   3   10.60    6.50
   5   6   3    4.50    3.20
  -6  -6  -3   69.29    7.70
   6   6   3   76.29    7.30
   6   6   3   65.69   10.60
  -7  -6  -3   13.80    4.30
   7   6   3   12.00    3.80
  -8  -6  -3  216.58   16.40
   8   6   3  195.38   16.30
  -9  -6  -3    6.20    2.90
   9   6   3    0.80    2.80
  10   6   3   18.00    2.50
   9  -7  -3    9.50    2.60
   9  -7  -3   11.30    2.10
  -9   7   3    5.50    1.80
  -9   7   3    6.60    3.40
   8  -7  -3   47.00    5.50
  -8   7   3   44.60    4.90
  -8   7   3   48.20   11.00
   7  -7  -3   18.80    4.00
  -7   7   3    4.30   10.00
  -7   7   3   10.10    2.70
  -7   7   3   10.70    3.50
  -6   7   3   -1.30    3.40
  -6   7   3    1.50    3.40
   5  -7  -3    0.40    3.30
  -5   7   3    1.60    3.70
  -5   7   3   -0.60   10.00
  -5   7   3    0.30    3.40
   4  -7  -3   52.99    6.20
  -4   7   3   56.09    8.00
   3  -7  -3    6.70    3.10
  -3   7   3    0.40    5.40
  -3   7   3   -0.60    7.50
   2  -7  -3  366.16   27.60
   2  -7  -3  318.07   26.00
  -2   7   3  357.16   25.70
  -2   7   3  290.27   32.70
  -2   7   3  375.56   28.30
   1  -7  -3  115.19   10.00
   1  -7  -3   91.59    8.70
   1  -7  -3  111.89    9.20
  -1   7   3  109.99   12.60
  -1   7   3   97.39    8.40
  -1   7   3  115.39   21.40
   0  -7  -3  749.13   62.89
   0  -7  -3  867.51   63.69
   0   7   3  862.21   70.89
   0   7   3  845.22   62.79
   0   7   3  920.01   65.79
   0   7   3  832.72   62.79
  -1  -7  -3   44.00    5.10
   1   7   3   44.20   16.00
   1   7   3   40.50    4.80
   1   7   3   33.20    7.80
  -2  -7  -3   48.60    5.60
  -2  -7  -3   58.69    7.10
   2   7   3   53.79    5.40
   2   7   3   55.39    9.10
   2   7   3   86.79   21.20
  -3  -7  -3  274.07   23.10
   3   7   3  320.97   27.00
   3   7   3  320.57   23.00
  -4  -7  -3    1.40    3.30
   4   7   3    3.00    2.90
   4   7   3    7.00    5.90
  -5  -7  -3   -0.90    3.60
   5   7   3   -3.70    5.50
   5   7   3    1.40    3.80
  -6  -7  -3   63.99    7.10
   6   7   3   66.79    7.30
   7   7   3   14.80    3.90
  -8  -7  -3  180.38   14.70
   8   7   3  194.98   14.90
  -9  -7  -3   31.20    3.90
   9   7   3   26.20    3.60
  -8   8   3   46.70   10.30
  -8   8   3   48.80    4.20
  -7   8   3    9.10    2.90
  -7   8   3    9.30    2.20
  -7   8   3    5.10    9.10
   6  -8  -3   29.40    4.60
  -6   8   3   29.80   12.00
  -6   8   3   26.40    5.40
  -6   8   3   30.50    3.90
  -5   8   3    5.20    3.40
  -5   8   3    5.00   10.10
  -5   8   3    4.30    3.50
   4  -8  -3   77.19    7.20
  -4   8   3   76.29    9.10
  -4   8   3   66.09    8.80
  -3   8   3   38.90    8.20
  -3   8   3   52.19    5.10
   2  -8  -3  157.38   13.00
  -2   8   3  178.48   16.00
  -1   8   3   27.00   13.70
  -1   8   3   40.10    4.20
  -1   8   3   36.30    7.40
   0   8   3   77.29   11.40
   0   8   3   66.59   16.80
   1   8   3   59.99   10.70
   1   8   3   58.39    5.50
   1   8   3   56.29    5.60
   1   8   3   37.80   15.80
  -2  -8  -3  456.45   34.10
   2   8   3  439.16   37.00
   2   8   3  456.05   44.60
  -3  -8  -3   -0.80    3.30
   3   8   3   -2.60    5.10
   3   8   3   -8.20   15.00
   3   8   3   -0.80    2.80
   4   8   3    5.60   17.60
   4   8   3    2.40    3.90
  -5  -8  -3    1.30    3.90
   5   8   3    1.40    3.30
  -6  -8  -3  151.48   12.20
   6   8   3  145.69   12.30
  -7  -8  -3   37.70    5.10
   7   8   3   35.20    5.20
  -8  -8  -3  106.39    8.40
   8   8   3   90.99    8.30
  -7   9   3    8.30    1.50
  -7   9   3    3.00    6.20
  -6   9   3   12.70    8.90
  -6   9   3   18.00    3.20
  -6   9   3   14.80    2.50
  -5   9   3    1.90    2.50
  -5   9   3    0.90    3.10
  -5   9   3    0.30    9.20
  -4   9   3    4.50    3.60
  -4   9   3   -2.70    8.20
  -4   9   3    3.40    3.30
  -3   9   3    6.40    4.20
  -3   9   3   -1.80    6.70
  -3   9   3    4.70    3.80
  -2   9   3  135.89   13.10
  -2   9   3  160.08   14.60
  -2   9   3  152.78   11.80
   1  -9  -3    6.50    3.60
  -1   9   3    7.20    5.30
  -1   9   3    3.30    3.40
  -1   9   3    6.20    2.10
  -1   9   3    9.90   11.00
   0  -9  -3  212.18   16.50
   0   9   3  222.48   16.20
   0   9   3  177.58   27.30
   0   9   3  248.08   19.30
   0   9   3  185.78   16.90
  -1  -9  -3   10.90    3.60
   1   9   3    3.90    2.80
   1   9   3    9.50    2.10
   1   9   3   -0.50   12.80
   1   9   3    9.70    5.00
  -2  -9  -3   20.80    3.80
   2   9   3    2.60   13.80
   2   9   3   11.30    3.00
   2   9   3    9.90    4.90
   3   9   3    2.50    3.60
   3   9   3    7.30   20.90
   4   9   3   -1.70    3.20
   4   9   3    2.10   23.30
  -5  -9  -3   22.90    4.30
   5   9   3   10.00   15.80
   5   9   3   33.80    6.50
  -6  -9  -3   54.19    5.80
   6   9   3   50.39    5.70
   6   9   3   26.40   15.30
  -7  -9  -3    1.10    2.80
   7   9   3   -1.60   11.30
   7   9   3    2.50    2.50
  -6  10   3   52.09    8.10
  -6  10   3   52.89    4.50
  -5  10   3    3.70    7.10
  -5  10   3    3.50    1.70
  -5  10   3    3.50    2.30
  -4  10   3    2.20    2.80
  -4  10   3    2.30    2.10
  -4  10   3   -2.80    8.20
  -3  10   3    6.20    3.20
  -3  10   3    1.70    6.20
  -3  10   3    3.10    2.30
  -2  10   3   48.50    5.50
  -2  10   3   50.89    6.70
  -1  10   3   11.50    4.10
  -1  10   3   15.00    2.20
  -1  10   3   10.10    2.60
  -1  10   3    6.30    8.70
   0  10   3    1.80   10.10
   0  10   3   -0.90    1.00
  -1 -10  -3    4.00    3.00
   1  10   3    0.70   11.60
  -2 -10  -3   95.49    8.40
  -3 -10  -3   42.10    5.40
   3  10   3   45.50    5.10
  -4 -10  -3    5.40    3.30
   4  10   3    2.10    2.70
   4  10   3    1.30   12.70
   5  10   3   -2.30   12.10
   5  10   3   10.10    2.50
   6  10   3   18.00    2.40
   6  10   3    4.20   10.60
  -4  11   3    1.90    5.60
  -4  11   3    3.20    1.50
  -3  11   3    3.60    2.00
  -3  11   3    1.90    1.20
  -3  11   3   -1.40    5.70
  -2  11   3   25.40    3.60
  -2  11   3   22.00    2.60
  -1  11   3    2.60    1.70
   0  11   3   83.39   12.70
   1  11   3   24.00    9.30
   2  11   3   34.30   10.60
   3  11   3    2.10    9.30
   2  10  -4  233.78   18.00
   1  10  -4    2.10    2.90
   0  10  -4    0.80    4.30
  -1  10  -4    1.00    6.60
  -2  10  -4    2.60    4.90
  -3  10  -4    5.10    4.80
   4   9  -4    3.70    4.90
   3   9  -4   -0.50    6.20
   1   9  -4   -0.90    3.70
   1   9  -4   -0.50   11.30
   0   9  -4   45.90    6.90
  -1   9  -4   10.90    6.40
  -2   9  -4   32.80    8.90
  -3   9  -4    1.80    7.00
  -4   9  -4    3.30    6.60
  -5   9  -4   81.49    6.40
  -5   9  -4   86.59   11.90
   5   8  -4   10.60    8.20
   4   8  -4    0.80   18.70
   3   8  -4    4.40   11.60
   2   8  -4   83.79   17.40
   2   8  -4  105.89    9.70
   1   8  -4    4.70   12.20
   0   8  -4  153.48   13.40
  -1   8  -4    3.00   15.60
  -2   8  -4    4.90    6.80
  -3   8  -4   38.40    3.20
  -3   8  -4   25.60    8.00
  -4   8  -4   15.90    1.90
  -4   8  -4   29.80    9.00
  -5   8  -4  226.38   18.00
  -5   8  -4  256.17   23.40
  -6   8  -4   66.99   12.60
  -6   8  -4   92.39    6.70
  -7   8  -4   54.39    4.50
  -7  -7   4    1.10    2.50
   5   7  -4    0.10   10.80
   4   7  -4   -0.60   13.00
   4   7  -4    0.30    3.50
   3   7  -4   13.30    4.60
   3   7  -4   14.70    6.10
   2   7  -4   82.49    8.60
   2   7  -4   74.49    8.50
   1   7  -4    9.90    3.00
   1   7  -4    1.80    4.00
   1   7  -4   -2.40   14.20
   0   7  -4  223.68   18.10
  -2   7  -4  374.16   25.20
  -2   7  -4  290.47   29.40
  -3   7  -4    4.90    6.50
  -3   7  -4    5.80    1.20
  -5   7  -4   58.99   12.80
  -5   7  -4   55.79    4.90
  -6   7  -4   42.00    3.90
  -6   7  -4   39.10   10.20
  -7   7  -4   -0.20    1.30
  -7   7  -4    0.40    7.60
  -8   7  -4    5.90    4.50
  -8   7  -4   10.60    1.40
  -8  -6   4   66.99    6.10
   7   6  -4   -0.60    8.30
  -7  -6   4    0.00    4.10
  -6  -6   4  189.68   15.50
   5   6  -4   10.50   13.50
   5   6  -4   14.00    4.50
  -5  -6   4   17.60    6.80
   4   6  -4    6.40    4.00
   4   6  -4    0.50   14.20
   3   6  -4   -3.60   14.80
   3   6  -4    1.80    3.70
   3   6  -4    1.90    3.90
   2   6  -4   15.00   15.40
   2   6  -4    4.10    3.00
   2   6  -4   10.40    3.80
   1   6  -4    0.00    2.30
   1   6  -4    3.40    3.60
   1   6  -4   -3.00   13.60
   0   6  -4  355.26   37.00
   0   6  -4  404.96   29.10
  -1   6  -4   27.40    3.70
  -1   6  -4   34.60    2.90
  -1   6  -4   20.90   10.40
  -2   6  -4  781.82   57.39
  -2   6  -4  877.11   65.19
  -2   6  -4  665.93   57.09
  -3   6  -4   11.00    2.10
  -3   6  -4    7.90    1.50
  -3   6  -4   14.80    6.00
  -4   6  -4   14.20    2.30
  -4   6  -4   11.10    1.70
  -4   6  -4    8.50    6.60
  -5   6  -4    2.30    1.80
  -5   6  -4    3.00    7.80
  -5   6  -4    0.70    1.40
  -6   6  -4    4.70    1.60
  -6   6  -4    2.70    8.60
  -6   6  -4    4.60    2.00
  -7   6  -4    1.10    1.40
  -7   6  -4    0.30    1.70
  -7   6  -4    0.30    7.50
  -9   6  -4    5.00    1.10
  -9   6  -4    1.70    3.60
  -9  -5   4    4.80    2.50
  -8  -5   4   25.30    4.20
  -7  -5   4    2.30    4.20
   5   5  -4    7.60    4.40
   4   5  -4   14.50    4.40
   3   5  -4    6.50   12.20
   3   5  -4    6.40    3.20
   2   5  -4   -1.60   12.00
   2   5  -4   12.00    2.70
  -2  -5   4   15.90    3.90
   1   5  -4   45.00    4.70
   1   5  -4   32.10   15.40
   1   5  -4   48.80    5.60
   0   5  -4  332.27   26.10
   0   5  -4  350.76   32.30
  -1   5  -4  144.59   21.20
  -1   5  -4  112.79   10.60
  -2   5  -4  494.05   37.50
  -2   5  -4  506.95   37.30
  -3   5  -4    6.60    4.50
  -3   5  -4    2.70    1.30
  -3   5  -4    2.00    1.00
   3  -5   4   -6.20    5.20
  -4   5  -4  791.22   59.09
  -4   5  -4  747.13   56.39
  -4   5  -4  733.33   56.39
  -5   5  -4  762.02   52.79
  -5   5  -4  753.02   52.89
  -5   5  -4  604.84   56.19
  -6   5  -4   68.49    5.90
  -6   5  -4   68.19    5.60
  -6   5  -4   51.09   12.00
  -7   5  -4    3.70    8.00
  -7   5  -4   -0.40    1.90
  -7   5  -4    0.40    1.50
  -8   5  -4   26.40    3.00
  -8   5  -4   23.90    3.40
  -9   5  -4    3.30    1.50
  -9   5  -4    0.00    4.40
  -9   5  -4    1.80    1.30
 -10   5  -4  133.79   10.30
  -9  -4   4    8.50    3.30
  -8  -4   4  170.88   14.00
  -7  -4   4    2.30    4.50
   6   4  -4  135.99   12.30
   5   4  -4    1.00    4.10
  -5  -4   4    5.40    4.70
   4   4  -4   83.99    9.30
  -4  -4   4   96.99    9.20
   3   4  -4   10.50    3.00
   3   4  -4   21.10    3.70
   2   4  -4    1.40    1.90
  -2  -4   4   -2.00    2.60
   1   4  -4  253.87   20.80
  -1  -4   4  290.57   21.30
   2  -4   4  473.95   37.80
  -3   4  -4    1.10    4.70
  -3   4  -4    0.40    1.10
  -3   4  -4    0.10    1.10
   3  -4   4    2.60    4.90
  -4   4  -4  204.08   19.80
  -4   4  -4  230.58   17.00
  -4   4  -4  246.68   17.10
   4  -4   4  206.48   21.00
  -5   4  -4   11.40    7.30
  -5   4  -4   22.50    2.70
  -5   4  -4   24.20    3.10
  -6   4  -4   27.60    3.10
  -6   4  -4   27.40    3.70
  -7   4  -4    3.00    7.90
  -7   4  -4    2.70    1.50
  -7   4  -4    3.50    2.20
  -8   4  -4    0.10    2.20
  -8   4  -4    0.90    8.00
  -8   4  -4    2.10    2.00
   8  -4   4    2.10    3.30
  -9   4  -4   30.60    3.00
  -9   4  -4   28.90    3.70
  -9   4  -4   21.20    6.30
   9  -4   4   29.80    3.40
 -10   4  -4  129.19   12.60
 -10   4  -4  151.48   10.90
 -10  -3   4    5.70    2.90
  -9  -3   4   11.60    4.00
   8   3  -4   29.00    3.60
   7   3  -4    0.50    2.80
   6   3  -4  168.58   13.60
   6   3  -4  127.69   11.60
  -6  -3   4  144.09   12.50
   5   3  -4   21.10    3.20
   5   3  -4   14.90    4.50
  -5  -3   4   29.70    4.70
   4   3  -4   68.39    7.10
  -4  -3   4   51.49    9.50
   3   3  -4    6.90    2.40
   3   3  -4   15.20    3.10
  -3  -3   4    9.20    2.60
  -2  -3   4  413.76   31.50
  -1  -3   4    3.50    2.00
   1  -3   4  117.29    9.50
   2  -3   4  596.44   46.50
   3  -3   4    3.90    5.00
  -4   3  -4  240.28   18.40
  -4   3  -4  273.97   18.60
   4  -3   4  204.18   22.20
  -5   3  -4   12.70    6.40
  -5   3  -4   18.10    2.40
  -5   3  -4   26.20    3.00
  -6   3  -4  131.69   10.60
  -6   3  -4  142.49   11.00
  -7   3  -4    1.60    7.90
  -7   3  -4   12.40    2.50
  -7   3  -4   10.30    1.80
  -8   3  -4    0.00    2.20
  -8   3  -4    0.50    6.50
  -8   3  -4    1.40    1.40
   8  -3   4    4.60    2.00
  -9   3  -4    0.20    5.40
  -9   3  -4    0.00    2.00
  -9   3  -4    2.60    1.40
   9  -3   4   -2.00    1.90
 -10   3  -4   92.39    8.90
 -10   3  -4  126.99    8.60
 -10   3  -4  113.79   11.80
 -10  -2   4   48.30    5.80
   9   2  -4    6.30    2.40
  -9  -2   4    2.60    4.20
   8   2  -4    1.10    3.20
  -7  -2   4    9.00    4.70
   6   2  -4   12.70    4.40
   6   2  -4   11.70    3.00
  -6  -2   4   16.50    6.40
   5   2  -4   12.60    4.00
   5   2  -4   22.10    3.00
  -5  -2   4   23.30    4.00
   4   2  -4  784.42   54.09
   4   2  -4  639.94   53.49
  -4  -2   4  730.93   53.89
  -3  -2   4    0.30    1.90
  -2  -2   4 1018.30   75.99
  -1  -2   4    4.90    1.70
   0   2  -4  -16.00   38.60
   1  -2   4  278.77   21.20
   2  -2   4    9.80    2.20
   3  -2   4    6.20    2.50
   4  -2   4  286.07   21.60
   4  -2   4  266.97   24.10
  -5   2  -4   -1.80    2.80
  -5   2  -4   -0.90    5.20
  -5   2  -4   -0.30    1.10
   5  -2   4   -7.70    5.40
   5  -2   4   -3.40    2.20
  -6   2  -4  112.29    8.20
  -6   2  -4   98.59    7.60
   6  -2   4   75.19    8.80
   6  -2   4   84.49   14.50
  -7   2  -4   27.90    3.60
  -7   2  -4   25.20    3.00
   7  -2   4   27.30    3.10
  -8   2  -4    0.90    6.30
  -8   2  -4    2.20    2.70
  -8   2  -4    0.30    1.40
   8  -2   4    2.30    2.00
  -9   2  -4    1.30    5.10
  -9   2  -4   -1.70    1.30
  -9   2  -4   -0.80    3.80
   9  -2   4    1.10    2.10
   9  -2   4    3.90    4.70
 -10   2  -4   44.60    8.20
 -10   2  -4   53.69    4.20
 -10   2  -4   36.10    4.80
  10  -2   4   49.50    4.40
 -11   2  -4    2.30    1.40
   9   1  -4    8.00    3.20
  -9  -1   4   16.30    4.50
   8   1  -4    2.90    2.90
  -7  -1   4   83.19    8.70
   6   1  -4   32.90    5.70
  -6  -1   4   24.90    5.00
   5   1  -4   41.30    4.10
   5   1  -4   35.60    5.00
  -5  -1   4   37.80    5.20
  -5  -1   4   34.10    5.20
   4   1  -4  700.83   52.99
  -4  -1   4  724.33   53.49
  -3  -1   4   46.20    4.80
  -2  -1   4  862.01   64.29
  -1  -1   4  236.68   16.50
  -1  -1   4  193.28   16.70
   0   1  -4    0.60   41.20
   1  -1   4  619.94   45.10
   1  -1   4  586.44   45.20
   2  -1   4 1337.77   99.59
   3  -1   4 1784.62  132.69
   4  -1   4  562.84   42.50
  -5   1  -4   22.00    2.30
   5  -1   4   17.10    2.40
   5  -1   4   16.20    6.80
   5  -1   4   24.30    3.50
   6  -1   4  546.75   40.00
   6  -1   4  519.75   40.60
  -7   1  -4   59.89    4.90
  -7   1  -4   54.49   10.70
   7  -1   4   63.89    7.20
   7  -1   4   47.50    5.00
  -8   1  -4  143.39   10.70
  -8   1  -4  141.19   15.30
  -8   1  -4  129.99   11.80
   8  -1   4  146.59   12.80
   8  -1   4  126.29   11.50
  -9   1  -4   66.49    7.40
  -9   1  -4   86.89   10.80
  -9   1  -4   71.49    6.50
   9  -1   4   67.39    6.60
   9  -1   4   84.29   10.10
 -10   1  -4    1.60    1.60
 -10   1  -4   -1.00    2.20
  10  -1   4    6.50    4.50
  10  -1   4    2.20    2.00
 -11   1  -4    1.40    1.40
  11  -1   4    3.10    3.20
  10   0  -4   12.30    2.60
   9   0  -4    0.60    4.40
   9   0  -4   -1.30    2.80
  -9   0   4   -1.40    4.40
   8   0  -4    4.80    3.20
   8   0  -4    0.80    4.30
  -8   0   4    6.90    4.80
   7   0  -4   41.20    5.20
   7   0  -4   45.50    6.80
  -7   0   4   43.30    6.70
   6   0  -4   33.20    5.40
   6   0  -4   37.50    4.20
   6   0  -4   33.80    5.40
  -6   0   4   34.80    4.50
   5   0  -4   10.50    3.90
   5   0  -4   15.40    2.20
  -5   0   4   18.50    5.00
   4   0  -4 2404.96  170.18
   4   0  -4 2172.08  169.58
   3   0  -4    1.20    2.40
  -3   0   4    0.10    1.70
   2   0  -4  294.17   21.00
  -2   0   4  252.77   21.80
  -2   0   4  267.87   20.70
  -1   0   4 1067.99   78.19
  -1   0   4 1022.40   77.79
   0   0   4   46.90    5.00
   1   0   4  654.53   50.29
   1   0   4  690.13   50.19
   2   0   4    9.90    2.20
   3   0   4   14.20    2.70
   4   0   4  566.54   42.70
   5   0   4    6.40    1.70
   5   0   4    6.50    2.60
  -6   0  -4 1417.36   94.29
   6   0   4 1156.58   93.99
   6   0   4 1267.37   94.89
   6   0   4 1177.08   94.39
   6   0   4 1327.27   97.49
  -7   0  -4   30.30    3.40
  -7   0  -4   38.20    8.80
   7   0   4   32.60    3.80
   7   0   4   34.70    6.40
  -8   0  -4  154.98   14.70
  -8   0  -4  117.69   10.20
   8   0   4  123.79   12.10
   8   0   4  131.99   10.50
  -9   0  -4   13.20    2.20
   9   0   4   18.30    2.80
 -10   0  -4   -0.80    2.40
  10   0   4    2.40    4.60
  10   0   4    3.70    2.10
 -11   0  -4    4.90    1.70
  11   0   4    8.80    1.90
  11   0   4   13.20    3.80
  10  -1  -4   40.40    6.40
   9  -1  -4   19.40    3.50
   9  -1  -4   18.90    4.70
   8  -1  -4   51.49    7.30
   8  -1  -4   44.90    5.60
  -8   1   4   46.10    7.00
   7  -1  -4    1.80    3.50
   7  -1  -4   -0.30    2.60
  -7   1   4    2.90    4.00
   6  -1  -4   18.70    4.80
   6  -1  -4    7.30    2.60
   6  -1  -4   11.40    3.70
  -6   1   4   13.80    3.40
   5  -1  -4    2.90    3.20
   5  -1  -4    5.90    3.30
   4  -1  -4  622.84   48.10
  -4   1   4  648.84   47.90
   3  -1  -4   36.60    5.20
  -3   1   4   36.70    4.80
   2  -1  -4   36.70    4.70
  -2   1   4   30.80    4.30
   1  -1  -4   55.79    5.50
  -1   1   4   57.99    5.30
   0  -1  -4  126.79   11.00
   0   1   4  150.28   11.70
   0   1   4  151.98   11.10
   0   1   4  137.19   11.60
   1   1   4  145.69   11.40
   2   1   4  255.57   19.60
   3   1   4   50.59    5.40
   4   1   4  347.47   26.60
   5   1   4   11.20    1.60
   5   1   4    8.80    3.10
  -6  -1  -4  292.97   22.20
   6   1   4  298.87   23.20
   6   1   4  268.67   22.10
   6   1   4  335.57   26.90
  -7  -1  -4    7.10    1.80
  -7  -1  -4    6.50    5.70
   7   1   4   10.60    4.40
   7   1   4   12.90    2.30
  -8  -1  -4   53.19    5.40
   8   1   4   65.89    8.20
   8   1   4   63.29    5.90
  -9  -1  -4   -0.90    2.20
   9   1   4    3.20    2.50
 -10  -1  -4    6.20    2.90
  10   1   4   13.10    5.00
  10   1   4   10.70    2.70
 -11  -1  -4    1.40    1.50
  11   1   4   -0.80    1.70
  11   1   4    3.40    3.80
  10  -2  -4    8.20    5.10
   9  -2  -4   -1.40    2.90
   9  -2  -4    0.60    4.20
   8  -2  -4   13.20    4.40
   8  -2  -4   11.50    3.20
   7  -2  -4    3.10    3.10
   7  -2  -4    1.00    3.70
  -7   2   4   -0.60    5.70
  -7   2   4   -0.20    3.80
   6  -2  -4    7.10    3.80
   6  -2  -4    1.90    3.50
  -6   2   4    2.20    3.10
  -6   2   4    3.50    5.60
  -6   2   4    1.30    2.70
   5  -2  -4   19.20    4.20
   5  -2  -4   12.90    3.00
  -5   2   4   15.50    3.70
  -4   2   4  623.24   47.60
  -3   2   4   10.00    2.70
   2  -2  -4   30.60    4.40
  -2   2   4   30.20    4.70
   1  -2  -4    9.00    2.30
  -1   2   4   13.80    2.40
   0   2   4  212.58   16.80
   0   2   4  219.08   16.50
   1   2   4    8.00    2.00
   2   2   4   36.40    4.30
   3   2   4  216.68   16.90
   4   2   4   49.60    5.50
   5   2   4   18.20    2.60
   5   2   4   17.40    3.40
  -6  -2  -4  205.48   15.40
   6   2   4  200.08   15.30
   6   2   4  223.98   16.60
   6   2   4  173.48   16.00
  -7  -2  -4    4.90    2.00
   7   2   4    7.60    4.70
   7   2   4    6.30    2.30
   8   2   4  105.59   10.80
   8   2   4  103.09    8.70
   9   2   4   21.70    3.50
 -10  -2  -4   -0.30    2.50
  10   2   4    6.50    4.70
  10   2   4    7.20    2.50
 -11  -2  -4    0.20    1.30
  11   2   4    2.70    1.70
  11   2   4    4.20    3.90
  10  -3  -4   28.40    3.90
  10  -3  -4   37.10    5.30
   9  -3  -4    3.80    2.80
   9  -3  -4   11.70    4.50
   8  -3  -4   11.80    3.40
   8  -3  -4   13.10    5.90
  -8   3   4    4.90    6.70
   7  -3  -4   78.69    7.70
  -7   3   4   64.39    6.90
  -7   3   4   65.69   11.80
  -7   3   4   60.19    6.90
   6  -3  -4   97.79    8.30
  -6   3   4   90.49    8.70
  -6   3   4   77.99   13.20
  -6   3   4   94.59    8.40
   5  -3  -4    5.10    3.70
   5  -3  -4   12.20    3.00
  -5   3   4    5.80    4.10
  -5   3   4    6.90    2.90
   4  -3  -4   23.80    3.90
   3  -3  -4   51.89    6.70
  -3   3   4   56.59    7.00
   2  -3  -4   83.69    8.00
  -2   3   4   89.19    8.30
   1  -3  -4   67.59    6.60
  -1   3   4   77.19    7.10
   0  -3  -4  168.68   13.50
   0   3   4  173.78   13.70
  -1  -3  -4  142.39   72.49
   2   3   4  488.65   36.80
   3   3   4 1011.70   75.49
   4   3   4  101.69   10.70
   4   3   4   87.79    7.20
  -5  -3  -4   33.80    4.40
   5   3   4   34.00    3.80
   5   3   4   34.30    4.70
   5   3   4   33.90    5.40
  -6  -3  -4  328.77   28.90
  -6  -3  -4  371.46   28.90
   6   3   4  378.76   29.70
   6   3   4  409.86   28.70
   6   3   4  416.76   29.40
   7   3   4  151.88   11.80
   7   3   4  142.29   13.00
   8   3   4   25.10    3.80
   8   3   4   29.10    6.00
   9   3   4   46.10    5.50
   9   3   4   52.49    8.30
 -10  -3  -4   93.09    9.10
  10   3   4  132.69   10.90
  10   3   4  115.39    9.00
 -11  -3  -4    1.70    1.20
  11   3   4    4.30    1.60
  11   3   4    2.50    2.50
  11   3   4    5.20    3.80
  10  -4  -4  103.29    8.60
  10  -4  -4  114.79    9.40
   9  -4  -4   -0.60    4.00
   9  -4  -4    2.20    2.70
   8  -4  -4   61.29    7.10
  -8   4   4   48.80    5.60
  -8   4   4   56.69   10.70
   7  -4  -4   21.90    4.80
  -7   4   4    9.90    3.70
  -7   4   4    1.70    7.80
  -7   4   4   18.00    3.50
  -7   4   4    1.60    7.80
   6  -4  -4  128.59   10.90
  -6   4   4  145.29   17.70
  -6   4   4  120.09   11.60
   5  -4  -4    9.80    3.20
   5  -4  -4    3.60    4.10
  -5   4   4    8.50    3.80
   4  -4  -4    1.00    3.60
  -4   4   4   -0.60    3.50
   3  -4  -4    2.50    3.10
   2  -4  -4  147.69   12.30
   1  -4  -4    2.40    2.10
   0  -4  -4 1461.65  108.79
  -1  -4  -4  -69.09   77.69
   1   4   4  -32.70  108.39
   2   4   4   18.30    2.70
   3   4   4  242.58   18.20
   3   4   4  225.38   17.60
  -4  -4  -4   29.40    4.00
   4   4   4   23.30    3.10
   4   4   4   18.80    4.60
   4   4   4   24.50    4.00
  -5  -4  -4   54.49    6.00
   5   4   4   57.09    5.20
   5   4   4   61.69    6.60
  -6  -4  -4    9.00    3.70
   6   4   4   12.40    2.60
   6   4   4    8.80    4.70
  -7  -4  -4   14.80    4.20
   7   4   4    6.60    5.40
   7   4   4    5.20    4.60
   8   4   4   72.69    9.80
   8   4   4   79.49    7.10
   9   4   4   89.69    7.80
   9   4   4   91.39   10.40
 -10  -4  -4  182.78   13.60
  10   4   4  170.48   15.30
  11   4   4    4.90    1.70
  11   4   4    5.90    3.40
  10  -5  -4   36.30    4.70
   9  -5  -4    1.00    2.70
   9  -5  -4    8.50    3.70
   8  -5  -4  261.47   19.80
  -8   5   4  235.68   19.30
  -8   5   4  254.57   22.80
   7  -5  -4   15.50    4.50
  -7   5   4   13.10    9.40
  -7   5   4   10.60    3.90
  -7   5   4    7.00    3.50
   6  -5  -4   70.59    7.20
  -6   5   4   61.99   16.20
  -6   5   4   49.99    6.70
  -6   5   4   69.89    7.90
   5  -5  -4    4.60    3.40
  -5   5   4    3.30    9.00
  -5   5   4    5.20    4.20
   4  -5  -4   60.19    7.40
   4  -5  -4   47.20    5.80
  -4   5   4   63.29    8.20
   3  -5  -4   78.09    7.50
   3  -5  -4   84.99    8.90
   3  -5  -4   78.39    8.20
  -3   5   4   72.89    9.90
   2  -5  -4  135.69   11.30
   2  -5  -4  116.39   11.20
  -2   5   4  145.29   13.80
   1  -5  -4   17.90    3.50
   0  -5  -4 1164.38   85.79
   0   5   4 1135.09   85.39
  -1  -5  -4    4.50    2.30
   1   5   4   11.90    1.90
   2   5   4  320.87   24.10
  -3  -5  -4   -1.10    2.60
  -3  -5  -4   11.60    2.60
   3   5   4    5.50    2.60
   3   5   4    7.20    4.40
   3   5   4    7.60    2.10
   3   5   4   13.20    5.60
  -4  -5  -4   88.49    9.20
  -4  -5  -4   99.39    8.70
   4   5   4  105.99   10.20
   4   5   4  111.59    9.50
   4   5   4  107.59   12.90
   4   5   4  113.29    8.50
  -5  -5  -4   39.80    6.80
  -5  -5  -4   58.29    5.70
   5   5   4   43.50    8.50
   5   5   4   53.79    8.10
   5   5   4   51.99    5.00
   5   5   4   35.70    6.10
  -6  -5  -4    8.40    3.60
   6   5   4   -2.20    6.60
   6   5   4   -0.60    5.90
   6   5   4    2.20    2.50
  -7  -5  -4    1.60    3.90
   7   5   4    4.00    6.30
   7   5   4    7.50    6.70
   7   5   4    2.80    3.10
  -8  -5  -4   82.99    7.70
   8   5   4   74.69    7.10
   8   5   4   71.29   11.40
  -9  -5  -4    2.70    2.90
   9   5   4    3.70    2.70
   9   5   4    2.70    5.20
   9   5   4    2.20    5.70
  10   5   4   35.30    5.10
   9  -6  -4    5.80    3.20
   9  -6  -4    4.40    2.40
  -9   6   4    0.70    1.30
   8  -6  -4  211.98   16.10
  -8   6   4  187.38   15.60
  -8   6   4  203.88   18.90
  -7   6   4    5.20    4.50
  -7   6   4    1.30    3.20
  -7   6   4    3.80    8.80
   6  -6  -4  134.49   11.10
  -6   6   4  117.59   11.60
  -6   6   4  123.59   12.10
  -6   6   4  136.59   19.50
   5  -6  -4   12.40    3.80
  -5   6   4    6.40    9.90
  -5   6   4    1.60    3.70
   4  -6  -4    9.70    3.70
  -4   6   4    0.10    8.20
  -4   6   4    7.50    5.70
   3  -6  -4  263.07   21.30
   3  -6  -4  263.27   21.40
   3  -6  -4  251.57   20.30
  -3   6   4  278.47   22.60
  -3   6   4  272.47   20.00
   2  -6  -4   18.20    3.60
   2  -6  -4   18.10    3.20
   2  -6  -4   14.10    4.10
  -2   6   4   16.90    2.30
  -2   6   4   13.00    5.60
  -2   6   4   10.20    7.60
   1  -6  -4    6.70    3.10
   1  -6  -4    7.50    2.70
   1  -6  -4    6.00    2.60
  -1   6   4    4.40    5.00
   0  -6  -4  591.44   49.50
   0  -6  -4  659.83   50.09
   0   6   4  629.64   49.40
   0   6   4  713.23   49.50
   0   6   4  737.63   52.79
  -1  -6  -4   10.60    2.80
  -1  -6  -4    7.40    2.80
   1   6   4    1.40    5.50
   1   6   4   11.00    2.80
  -2  -6  -4  247.88   20.40
  -2  -6  -4  260.07   20.10
   2   6   4  238.88   25.50
   2   6   4  287.57   19.90
   3   6   4   27.00    3.10
   3   6   4   20.20    5.60
   3   6   4   20.60    7.20
  -4  -6  -4  143.39   11.40
   4   6   4  152.28   11.30
   4   6   4  132.59   16.90
   4   6   4  124.99   13.30
  -5  -6  -4   54.29    6.10
   5   6   4   67.39   13.30
   5   6   4   40.20    8.50
   5   6   4   57.09    5.80
  -6  -6  -4    1.10    3.60
   6   6   4    1.00    7.50
   6   6   4   -0.40    6.70
   6   6   4   -6.20    4.10
  -7  -6  -4   28.60    4.50
   7   6   4   28.60    8.40
   7   6   4   23.00    3.90
   7   6   4    6.80    8.70
  -8  -6  -4   70.69    6.80
   8   6   4   69.69   10.10
   8   6   4   53.79    7.10
   9   6   4    8.10    2.70
  10   6   4   33.40    3.50
   9  -7  -4   19.20    3.50
   8  -7  -4  153.88   11.90
  -8   7   4  139.79   11.50
   7  -7  -4   15.60    4.10
  -7   7   4    6.80    3.60
  -7   7   4    7.10    2.70
  -7   7   4    8.20    8.70
  -6   7   4   15.20   10.90
  -6   7   4   27.40    4.30
  -6   7   4   25.20    4.70
  -5   7   4    5.20    3.90
  -5   7   4    8.00    4.10
  -5   7   4    5.80    9.80
   4  -7  -4   47.10    6.20
  -4   7   4   52.89    5.20
  -4   7   4   43.20    8.10
   3  -7  -4    3.50    5.30
  -3   7   4    9.40    2.20
  -3   7   4   -1.10    6.40
  -3   7   4    6.80    4.60
   2  -7  -4    2.90    2.80
  -2   7   4    0.70    2.00
  -2   7   4    0.30    5.10
  -2   7   4   -0.30    8.10
   1  -7  -4   16.50    3.30
   1  -7  -4   13.30    3.70
  -1   7   4   20.00    2.90
  -1   7   4    3.80   10.10
  -1   7   4    7.70    5.50
   0  -7  -4  469.45   36.70
   0  -7  -4  449.95   35.90
   0   7   4  503.95   43.80
   0   7   4  509.75   39.60
   0   7   4  472.45   35.70
  -1  -7  -4   55.49    6.60
  -1  -7  -4   51.09    5.70
   1   7   4   58.39    5.50
   1   7   4   63.99   11.30
   1   7   4   61.39   15.80
  -2  -7  -4  186.88   15.90
   2   7   4  207.78   20.70
   2   7   4  221.78   27.40
   2   7   4  205.88   15.60
   3   7   4   15.60    2.80
   3   7   4    8.90    7.00
  -4  -7  -4  129.89   11.00
   4   7   4  135.49   10.70
   4   7   4  132.29   17.00
  -5  -7  -4   11.60    3.50
   5   7   4   -0.90    7.40
  -6  -7  -4    7.50    3.50
   6   7   4    7.10    3.30
   6   7   4   -0.30    7.10
  -7  -7  -4   26.30    5.00
   7   7   4   28.80    4.10
  -8  -7  -4   78.19    7.30
   8   7   4   81.09    7.20
   9   7   4    4.00    2.10
   8  -8  -4   18.40    2.80
  -8   8   4   11.50    1.70
   7  -8  -4    9.60    3.30
  -7   8   4    3.10    6.00
  -7   8   4    7.70    2.90
  -7   8   4    7.30    3.30
   6  -8  -4  153.98   12.50
  -6   8   4  156.68   13.50
  -6   8   4  154.48   18.80
  -6   8   4  148.09   12.60
   5  -8  -4    4.90    3.60
  -5   8   4   -0.90    9.60
  -5   8   4    5.00    5.20
   4  -8  -4  264.47   20.00
  -4   8   4  247.98   21.60
   3  -8  -4   60.49    6.90
  -3   8   4   63.69    9.70
   2  -8  -4   33.60    4.90
  -2   8   4   24.10    6.60
  -2   8   4   15.90    9.20
  -2   8   4   33.80    3.90
   1  -8  -4   60.29    6.40
  -1   8   4   64.29   10.80
  -1   8   4   36.30   12.50
   0  -8  -4   11.40    3.40
   0   8   4    4.30    6.10
   0   8   4    6.50   12.10
  -1  -8  -4  264.97   19.70
   1   8   4  221.98   30.20
   1   8   4  268.17   24.10
  -2  -8  -4  110.79    9.50
   2   8   4  111.19   24.00
   2   8   4  109.99   15.00
  -3  -8  -4   32.20    5.60
   3   8   4   27.70   14.90
   3   8   4   30.40    8.70
  -4  -8  -4  131.09   10.80
   4   8   4  128.29   10.50
   4   8   4  136.79   25.00
   4   8   4  107.19   15.60
   5   8   4    4.50    6.20
   5   8   4   12.20    3.20
   5   8   4    8.90   22.10
  -6  -8  -4   65.29    6.60
   6   8   4   56.49    6.30
  -7  -8  -4   67.89    6.70
   7   8   4   62.69    6.30
  -8  -8  -4    3.30    2.50
   8   8   4    3.40    2.50
   8   8   4    2.40   10.40
  -7   9   4   -0.30    1.30
   6  -9  -4   11.00    2.70
  -6   9   4    7.70    6.60
  -6   9   4    4.60    2.30
  -6   9   4    5.90    3.20
   5  -9  -4    4.10    2.90
  -5   9   4    1.40    3.00
  -5   9   4    0.90    2.60
  -5   9   4    0.30   10.90
   4  -9  -4  163.58   13.30
  -4   9   4  173.58   14.90
  -4   9   4  171.18   14.30
   3  -9  -4    3.70    4.50
  -3   9   4    0.20    4.40
  -3   9   4   -0.20    7.40
  -3   9   4    0.10    4.40
  -2   9   4  103.19   12.90
   1  -9  -4    2.60    3.50
  -1   9   4   -3.40    4.90
  -1   9   4    0.40    1.90
  -1   9   4    2.00    9.40
   0  -9  -4    6.00    3.40
   0   9   4    2.40    1.90
   0   9   4    1.80   11.00
   0   9   4    2.70    5.40
  -1  -9  -4  196.98   15.70
   1   9   4  205.28   19.40
  -2  -9  -4   32.40    4.90
   2   9   4   16.70   13.40
   2   9   4   33.30    4.30
   2   9   4   24.20    7.20
  -3  -9  -4    3.00    3.60
   3   9   4   -0.90    2.70
   3   9   4    4.20    6.50
   3   9   4    5.20   13.00
  -4  -9  -4   16.70    3.80
   4   9   4   15.80    3.30
   4   9   4    7.60   13.40
   4   9   4   10.90    4.70
  -5  -9  -4    2.00    3.40
   5   9   4    4.30    3.00
   5   9   4    1.50   13.10
  -6  -9  -4   26.30    3.70
   6   9   4    8.60   12.60
   6   9   4   21.30    3.40
  -7  -9  -4    2.10    2.40
   7   9   4   -2.30    9.80
  -5  10   4    4.10    1.90
  -5  10   4    1.70    2.40
  -5  10   4    3.00    6.00
  -4  10   4  137.19   16.30
  -4  10   4  166.08   13.00
  -4  10   4  145.49   13.00
  -3  10   4   57.39    6.50
  -3  10   4   59.49    7.20
  -2  10   4   48.90    5.70
  -2  10   4   57.19    7.60
   1 -10  -4    1.80    3.10
  -1  10   4   -0.60    2.80
  -1  10   4    0.00    1.80
  -1  10   4    1.20    4.10
  -1  10   4    0.00    7.00
   0 -10  -4    4.60    3.40
   0  10   4    2.50    8.50
   0  10   4    4.50    2.50
   0  10   4    1.80    4.50
   0  10   4    3.60    1.90
  -1 -10  -4  100.99    8.50
   1  10   4   95.39   10.70
   2  10   4    9.80    4.10
   2  10   4    7.40   11.00
  -3 -10  -4    2.60    3.20
   3  10   4    0.90    2.60
   3  10   4   -5.10   10.80
   3  10   4    3.20    1.90
  -4 -10  -4  130.99   10.90
   4  10   4  136.69   10.70
  -5 -10  -4   36.30    4.60
   5  10   4   38.30    4.40
  -6 -10  -4   64.29    5.80
   6  10   4   61.29    5.50
  -4  11   4   85.09    6.90
  -4  11   4   77.69    7.20
  -3  11   4    3.00    5.90
  -3  11   4    2.00    2.10
  -3  11   4    3.00    1.40
  -2  11   4   87.39    6.80
  -2  11   4   85.69    7.00
  -2  11   4   84.89    7.80
  -1  11   4    1.40    2.30
  -1  11   4    2.10    4.30
  -1 -11  -4   50.29    4.40
   1  11   4   36.40    4.80
  -2 -11  -4    3.70    2.80
   2  11   4   -0.10    7.00
   3  11   4   11.30    7.70
   2   9  -5    5.50    3.50
   1   9  -5   16.80    4.00
   0   9  -5    2.30    3.60
  -1   9  -5    1.60    4.40
  -2   9  -5    1.30    5.10
  -3   9  -5   12.80    5.50
   3   8  -5    2.70    5.40
   3   8  -5    4.90    4.00
   2   8  -5    4.50    7.00
   1   8  -5   12.60    4.40
   1   8  -5   14.30    7.40
   0   8  -5    1.50    3.90
   0   8  -5    1.10    6.10
  -1   8  -5    0.60    5.40
  -2   8  -5   40.50    9.90
  -3   8  -5    3.40    7.00
  -4   8  -5  130.49   15.10
  -4   8  -5  122.29    9.60
  -5   8  -5   19.70    2.20
  -5   8  -5   20.20    7.00
  -6   8  -5  156.78   11.90
   3   7  -5   -0.20   10.30
   3   7  -5    3.60    3.70
   2   7  -5   23.40   11.90
   1   7  -5    5.00   10.30
   1   7  -5    0.20    3.10
  -1   7  -5   33.40   11.40
  -2   7  -5    5.70    2.20
  -2   7  -5   -0.70    5.50
  -3   7  -5   22.10    2.50
  -3   7  -5    7.40    9.70
  -4   7  -5  197.08   16.40
  -4   7  -5  245.78   22.10
  -5   7  -5   11.60    1.70
  -5   7  -5   13.10    8.00
  -6   7  -5  241.78   18.30
  -7   7  -5   12.30    1.50
  -7   7  -5    5.50    4.60
  -7  -6   5    0.60    2.90
   5   6  -5    4.50    5.10
   5   6  -5    0.00    3.90
   4   6  -5    7.70    4.20
   4   6  -5   12.20   10.20
   3   6  -5    5.40    4.00
   3   6  -5    3.00   12.70
   2   6  -5   56.79    7.30
   2   6  -5   52.99    6.90
   1   6  -5    1.50   11.30
   1   6  -5    5.40    2.70
   0   6  -5    4.80    2.40
   0   6  -5    3.30    9.40
  -1   6  -5    2.60    2.00
  -1   6  -5    1.40    7.40
  -2   6  -5  300.47   21.90
  -2   6  -5  267.17   24.40
  -2   6  -5  288.87   21.50
  -3   6  -5  166.38   13.00
  -3   6  -5  181.78   16.70
  -3   6  -5  149.59   12.60
  -4   6  -5  346.97   28.90
  -4   6  -5  295.67   24.30
  -4   6  -5  331.87   24.60
  -5   6  -5    6.00    8.20
  -5   6  -5    3.80    3.20
  -5   6  -5    1.30    1.30
  -6   6  -5  637.94   46.90
  -6   6  -5  614.84   46.80
  -7   6  -5   14.30    2.00
  -7   6  -5   16.80    2.20
  -8  -5   5    1.90    2.80
  -7  -5   5    7.70    3.80
   6   5  -5   41.70    9.70
  -6  -5   5   55.09    6.70
   5   5  -5    2.20    4.70
   5   5  -5   -1.30    7.90
   4   5  -5  355.26   28.10
   3   5  -5    3.30   12.20
   3   5  -5   -1.10    3.50
   2   5  -5   54.19    6.90
   2   5  -5   59.99    6.50
   1   5  -5    1.10    2.20
   1   5  -5    3.80   10.50
   0   5  -5  173.38   13.50
   0   5  -5  169.88   13.90
  -1   5  -5   38.40    4.10
  -1   5  -5   34.30    3.30
  -2   5  -5   28.00    3.70
  -2   5  -5   33.00    8.20
  -2   5  -5   30.50    3.00
  -3   5  -5  601.74   48.40
  -3   5  -5  635.44   47.00
  -4   5  -5   90.99    7.30
  -4   5  -5   81.19   12.70
  -4   5  -5   98.39    7.70
  -5   5  -5   57.79   12.90
  -5   5  -5   77.89    6.20
  -5   5  -5   79.99    6.50
  -6   5  -5 1020.50   75.89
  -7   5  -5   17.40    2.30
  -7   5  -5   21.90    2.70
  -8   5  -5  265.97   20.00
  -8   5  -5  263.87   20.60
  -9   5  -5   12.10    1.50
  -9   5  -5    9.70    1.60
  -9  -4   5    5.20    2.80
  -8  -4   5   11.80    3.90
  -7  -4   5   14.50    4.50
   6   4  -5    8.60    6.40
   5   4  -5    5.10    4.60
  -5  -4   5    6.30    5.00
   4   4  -5   91.49    9.90
   3   4  -5   -1.90    2.90
   3   4  -5    0.00    3.70
   2   4  -5  332.27   25.10
   2   4  -5  317.67   25.20
  -2  -4   5  334.77   25.80
   1   4  -5   43.00    5.70
   1   4  -5   32.70    4.30
  -1  -4   5   38.50    6.20
   0   4  -5  309.77   22.50
   0   4  -5  293.27   22.60
   0  -4   5  281.77   22.80
  -1   4  -5   77.19    6.50
  -2   4  -5   -0.50    6.90
  -2   4  -5    9.80    1.80
  -3   4  -5   76.79   10.20
  -3   4  -5   83.69    6.40
  -3   4  -5   86.09    6.70
   3  -4   5   59.79   11.60
  -4   4  -5   86.59    7.00
  -4   4  -5   78.19    6.60
   4  -4   5   97.79   14.20
  -5   4  -5   89.99    6.90
  -5   4  -5   73.39    6.60
  -6   4  -5   24.50    3.00
  -6   4  -5   22.60    3.40
  -7   4  -5    2.30    8.20
  -7   4  -5   31.20    3.50
  -8   4  -5  215.48   16.40
  -8   4  -5  214.48   16.50
  -9   4  -5   21.70    2.60
  -9   4  -5   25.80    3.40
 -10   4  -5    6.80    1.60
 -10   4  -5   12.50    1.30
  -9  -3   5    3.60    3.50
  -8  -3   5   62.19    7.20
   6   3  -5    2.30    4.70
  -6  -3   5   -2.60    4.60
  -5  -3   5   35.00    5.70
   4   3  -5   49.00    7.30
  -4  -3   5   53.59    6.70
   3   3  -5    2.40    3.50
   3   3  -5   -0.50    2.50
  -3  -3   5    3.50    3.20
   2   3  -5  512.35   39.50
   2   3  -5  548.05   39.70
  -2  -3   5  516.45   39.90
   1   3  -5   89.59    7.90
   1   3  -5   90.79    7.60
  -1  -3   5   94.49    8.60
   1  -3   5   10.20    2.40
  -2   3  -5   42.10    4.00
   2  -3   5   53.59    8.50
   2  -3   5   44.00    5.20
  -3   3  -5  147.89   10.70
   3  -3   5  130.79   11.60
   3  -3   5  131.29   14.90
  -4   3  -5   24.60    2.70
  -4   3  -5   31.80    3.30
   4  -3   5   16.60    6.60
  -5   3  -5   13.80    2.10
  -5   3  -5   11.70    1.60
  -5   3  -5   -3.00    6.30
  -6   3  -5   45.40    4.70
  -6   3  -5   45.90    4.20
  -7   3  -5   19.70    2.70
  -7   3  -5   16.10    2.20
  -8   3  -5  260.17   21.00
  -8   3  -5  287.67   20.70
  -9   3  -5    4.70    2.10
  -9   3  -5    4.00    4.00
  -9   3  -5    3.00    1.40
 -10   3  -5   54.29    5.20
 -10   3  -5   67.59    5.00
 -10  -2   5   83.49    7.50
  -9  -2   5    6.70    4.00
  -7  -2   5   29.00    5.70
   6   2  -5   21.00    5.30
  -6  -2   5    9.90    4.90
   5   2  -5   -6.40    6.00
  -5  -2   5    2.00    3.80
   4   2  -5   11.80    3.70
  -4  -2   5   16.60    3.10
  -3  -2   5   42.80    5.20
  -2  -2   5  825.42   61.79
  -1  -2   5   26.70    3.90
   0   2  -5  595.34  131.49
   0   2  -5  466.45  147.29
   1  -2   5   26.70    4.00
   2  -2   5    9.10    2.40
   3  -2   5   66.39    8.10
  -4   2  -5    6.70    1.60
   4  -2   5    4.60    5.50
   4  -2   5   11.60    3.20
  -5   2  -5  190.58   14.10
  -5   2  -5  214.88   14.40
   5  -2   5  148.39   19.70
   5  -2   5  163.08   15.20
  -6   2  -5   74.29   11.90
  -7   2  -5    5.20    2.10
  -7   2  -5    4.40    1.50
  -7   2  -5    2.10    6.30
  -8   2  -5  178.08   13.60
  -8   2  -5  142.29   16.40
  -8   2  -5  188.48   13.20
   8  -2   5  172.48   13.30
  -9   2  -5    2.30    4.20
  -9   2  -5    2.30    2.00
  -9   2  -5    4.60    1.50
 -10   2  -5   86.79    8.90
 -10   2  -5  121.19    8.30
  -9  -1   5    1.70    4.20
  -7  -1   5   38.10    5.80
   6   1  -5   38.40    6.20
  -6  -1   5   38.90    6.60
   5   1  -5   54.89    7.70
  -5  -1   5   49.10    6.50
   4   1  -5   37.20    5.20
  -4  -1   5   49.10    5.50
   3   1  -5  182.28   18.60
  -3  -1   5  246.48   17.20
   2   1  -5  317.27  163.18
  -1  -1   5   47.60    4.70
   0   1  -5  715.13  147.69
   0   1  -5  556.74  133.19
   1  -1   5    1.50    2.00
   2  -1   5 1530.35  113.99
   3  -1   5  468.85   35.60
  -4   1  -5   62.09    5.40
  -4   1  -5   76.49    5.80
   4  -1   5   60.19    7.10
  -5   1  -5  128.69   10.50
  -5   1  -5  157.38   10.80
   5  -1   5  119.69   11.80
  -6   1  -5   33.80    3.90
  -6   1  -5   30.20    3.20
  -6   1  -5   33.70    8.50
   6  -1   5   30.20    4.50
   6  -1   5   27.50    4.20
  -7   1  -5   61.59    5.30
  -7   1  -5   59.99   10.10
  -7   1  -5   68.29    6.10
   7  -1   5   55.99    5.40
  -8   1  -5  200.08   15.20
  -8   1  -5  183.88   17.70
  -8   1  -5  192.38   14.60
   8  -1   5  187.48   14.70
  -9   1  -5   22.30    3.50
  -9   1  -5   26.50    3.30
  -9   1  -5   27.90    6.20
   9  -1   5   30.10    4.00
   9  -1   5   40.50    6.10
 -10   1  -5  216.18   16.60
  10  -1   5  224.68   18.80
 -11   1  -5    1.20    1.20
  -9   0   5    3.60    4.50
   8   0  -5  222.88   17.40
   7   0  -5    2.80    4.30
  -7   0   5    4.50    4.80
   6   0  -5   43.90    6.30
   6   0  -5   42.10    4.70
  -6   0   5   48.00    6.50
   5   0  -5    4.20    2.80
   5   0  -5    4.80    2.90
   5   0  -5   -1.70    3.60
   5   0  -5    3.80    1.90
  -5   0   5   -3.70    2.60
  -5   0   5   -0.70    3.40
   4   0  -5   41.90    5.20
   4   0  -5   37.40    5.70
   4   0  -5   25.70    6.40
  -4   0   5   34.10    5.80
  -4   0   5   43.60    5.30
   3   0  -5  154.88   12.50
  -3   0   5  147.29   12.20
  -2   0   5  256.17   19.70
  -1   0   5  233.98   18.00
   0   0  -5  524.55  125.19
   0   0  -5  748.13  169.08
   1   0   5    9.10    2.20
   2   0   5  785.52   58.79
   3   0   5   53.29    5.90
   4   0   5  110.09    9.80
  -5   0  -5   10.30    1.70
   5   0   5   12.20    3.50
   5   0   5   12.50    1.90
  -6   0  -5   -1.10    4.10
  -6   0  -5    5.40    2.30
  -6   0  -5    2.30    1.20
   6   0   5    2.70    3.00
   6   0   5    4.20    7.10
   6   0   5    3.80    3.90
  -7   0  -5  103.49    9.00
  -7   0  -5  134.09    9.80
   7   0   5  108.39    9.00
  -8   0  -5  161.68   13.30
  -8   0  -5  170.18   13.90
  -8   0  -5  188.28   16.90
   8   0   5  170.08   13.40
   8   0   5  175.48   15.40
  -9   0  -5    7.10    1.90
  -9   0  -5    5.60    3.90
   9   0   5   10.90    2.40
   9   0   5    8.60    7.70
 -10   0  -5   10.00    1.90
 -10   0  -5    6.90    2.20
  10   0   5   14.30    2.40
 -11   0  -5    0.20    1.10
  11   0   5    2.30    3.30
   9  -1  -5    9.80    2.60
   8  -1  -5  105.39   10.30
   8  -1  -5  143.79   12.00
  -8   1   5  131.79   11.60
   7  -1  -5   -0.50    4.20
   6  -1  -5  228.38   19.50
   6  -1  -5  234.18   18.10
  -6   1   5  250.87   18.80
   5  -1  -5   -2.40    3.20
   5  -1  -5    0.50    3.50
   5  -1  -5    2.60    1.90
   4  -1  -5   75.49    7.10
   4  -1  -5   60.29    6.10
   4  -1  -5   49.70    7.90
  -4   1   5   67.49    7.50
  -4   1   5   75.09    7.00
   3  -1  -5   -0.70    2.80
  -3   1   5   -1.10    2.00
   2  -1  -5   15.20    3.30
  -2   1   5   15.20    2.50
  -1   1   5    1.90    1.80
   0   1   5   70.59    6.30
   1   1   5    1.20    1.80
   2   1   5 1280.57   95.39
   3   1   5    6.60    2.50
   4   1   5  277.87   21.70
  -5  -1  -5    5.00    2.00
  -5  -1  -5    4.90    1.30
   5   1   5    5.40    1.40
   5   1   5    4.60    2.80
  -6  -1  -5   63.99    5.90
  -6  -1  -5   78.69    9.30
   6   1   5   67.89    8.00
   6   1   5   65.99    7.30
   7   1   5   32.20    3.70
  -8  -1  -5  101.89    9.10
  -8  -1  -5   85.39    8.20
   8   1   5  112.99    8.50
   8   1   5  100.39   10.90
  -9  -1  -5    0.80    2.60
  -9  -1  -5    0.90    1.80
   9   1   5    2.60    2.50
 -10  -1  -5   32.80    4.10
  10   1   5   39.00    4.10
  10   1   5   40.70    7.30
 -11  -1  -5    0.00    1.10
  11   1   5    3.20    3.50
   9  -2  -5   15.30    4.20
   8  -2  -5   22.30    5.30
   8  -2  -5   18.80    3.50
   7  -2  -5   10.10    3.90
   7  -2  -5    3.80    3.50
  -7   2   5    9.60    4.80
   6  -2  -5  467.05   33.60
   6  -2  -5  434.96   33.10
  -6   2   5  424.06   33.60
   5  -2  -5   26.60    3.80
   5  -2  -5   23.70    4.50
  -5   2   5   30.20    5.10
   4  -2  -5  395.56   33.00
  -4   2   5  462.55   33.10
  -3   2   5   19.10    3.30
   2  -2  -5    1.80    2.60
  -2   2   5    0.10    2.50
   1  -2  -5   23.30    4.40
  -1   2   5   24.50    3.70
  -1   2   5   24.40    3.40
   0   2   5  281.97   22.60
   0   2   5  304.07   22.30
   1   2   5   76.49    6.90
   2   2   5 1300.27   96.89
   3   2   5  166.08   13.50
   4   2   5  285.47   22.90
   4   2   5  325.87   23.70
  -5  -2  -5    1.20    1.60
   5   2   5    4.70    3.70
   5   2   5    4.40    3.00
   5   2   5    1.00    1.50
  -6  -2  -5    3.10    1.80
   6   2   5    0.60    1.80
   6   2   5    1.30    3.20
  -7  -2  -5   13.50    2.90
   7   2   5   14.80    5.20
   7   2   5   13.50    2.60
  -8  -2  -5  131.39   10.80
  -8  -2  -5  106.09   10.30
   8   2   5  134.49   12.40
   8   2   5  137.09   10.40
  -9  -2  -5   23.50    4.20
   9   2   5   31.60    4.20
 -10  -2  -5  105.39   10.10
  10   2   5  138.79   10.10
  10   2   5  144.29   11.90
 -11  -2  -5    0.30    1.00
  11   2   5    2.90    3.60
  10  -3  -5   -1.10    3.00
   9  -3  -5   14.60    2.90
   8  -3  -5   21.20    3.80
   7  -3  -5    9.60    4.40
   7  -3  -5    8.20    3.00
  -7   3   5    5.00    3.00
  -7   3   5    8.40    2.70
   6  -3  -5   50.29    6.30
  -6   3   5   58.49    6.80
   5  -3  -5   26.20    5.20
   5  -3  -5   34.40    4.80
  -5   3   5   31.90    5.60
  -5   3   5   35.40    5.40
   4  -3  -5  485.95   35.20
   4  -3  -5  455.35   34.30
  -4   3   5  434.16   35.20
  -4   3   5  451.45   34.70
   3  -3  -5   59.99    7.20
  -3   3   5   69.09    8.00
   2  -3  -5  112.89  161.38
   2  -3  -5 -152.48  162.88
   1  -3  -5    0.70    2.30
  -1   3   5    2.60    2.60
   0   3   5   32.00    5.40
   1   3   5  106.79    9.00
   2   3   5  748.83   56.19
   3   3   5   40.80    5.20
   4   3   5  580.64   41.50
   4   3   5  519.85   40.90
  -5  -3  -5   17.70    2.70
   5   3   5   14.10    2.20
   5   3   5   15.20    3.40
   5   3   5   20.00    4.50
  -6  -3  -5  295.37   21.90
   6   3   5  269.57   22.50
   6   3   5  287.57   21.50
   7   3   5  525.25   38.00
   7   3   5  490.15   38.90
  -8  -3  -5   15.30    3.20
   8   3   5   12.50    3.00
   8   3   5   22.40    5.90
  -9  -3  -5    4.20    2.40
   9   3   5   10.70    5.50
  10   3   5   33.10    3.80
  10   3   5   37.10    7.10
 -11  -3  -5   -0.60    0.90
  11   3   5    1.20    3.30
  11   3   5   -0.30    2.60
  10  -4  -5    3.00    2.80
   9  -4  -5    5.00    3.90
   8  -4  -5   13.50    3.80
   8  -4  -5   15.80    3.30
  -8   4   5    7.70    2.50
   7  -4  -5    9.80    4.50
  -7   4   5   -1.10    3.30
  -7   4   5    0.30    2.90
   6  -4  -5  594.24   45.00
  -6   4   5  604.44   45.90
  -5   4   5    9.10    4.40
  -5   4   5   11.40    3.60
   4  -4  -5  144.59   11.30
   4  -4  -5  137.49   12.50
  -4   4   5  142.69   13.50
  -4   4   5  138.99   11.90
   3  -4  -5    6.70    3.40
  -3   4   5    0.90    3.70
  -3   4   5   13.00    4.20
  -3   4   5    3.40    5.00
   2  -4  -5   67.29    7.40
  -2   4   5   77.39    8.50
   1  -4  -5   71.69    7.20
   0  -4  -5  193.58  169.18
   1   4   5  265.47   20.20
   2   4   5  386.56   28.00
   2   4   5  348.37   27.40
   3   4   5   30.70    4.60
   3   4   5   35.00    3.50
   4   4   5  229.68   16.90
   4   4   5  250.87   17.80
   4   4   5  189.88   18.10
  -5  -4  -5    4.00    2.70
  -5  -4  -5    4.50    1.80
   5   4   5    5.20    1.90
   5   4   5   -6.90    4.30
   5   4   5    0.30    3.30
  -6  -4  -5   66.79    6.50
   6   4   5   64.29    5.90
  -7  -4  -5   99.99    8.70
   7   4   5  103.49   10.90
   7   4   5  105.29    8.60
   8   4   5   14.90    2.90
   8   4   5   21.40    6.80
  -9  -4  -5    5.10    2.10
   9   4   5    7.90    5.80
   9   4   5   10.80    2.50
 -10  -4  -5   34.20    3.20
  10   4   5   32.60    6.30
   9  -5  -5   32.20    3.70
   8  -5  -5   15.70    4.10
   8  -5  -5   13.90    2.90
  -8   5   5   10.10    4.90
   7  -5  -5    2.30    4.60
  -7   5   5   -0.20    4.10
   6  -5  -5   75.09    8.10
  -6   5   5   78.09    8.80
   5  -5  -5    7.40    3.70
  -5   5   5    0.80    4.50
   4  -5  -5   56.19    6.20
  -4   5   5   54.89    9.10
   3  -5  -5    7.50    4.10
   3  -5  -5   10.70    3.30
  -3   5   5    5.60    1.80
  -3   5   5    5.00    5.10
   2  -5  -5  173.88   13.30
   2  -5  -5  149.59   12.80
  -2   5   5  150.38   11.80
  -2   5   5  147.29   13.10
   1  -5  -5   -0.40    2.50
   1  -5  -5    1.30    2.60
  -1   5   5   -1.20    5.50
  -1   5   5   -0.50    5.10
   0  -5  -5    1.20    2.50
   0   5   5   -0.70    4.70
  -1  -5  -5    9.60    2.50
   1   5   5    2.80    8.30
   1   5   5    4.10    1.90
   1   5   5   18.60    6.20
  -2  -5  -5  106.79    9.00
   2   5   5  121.99   13.50
   2   5   5  102.39   10.90
   2   5   5  117.89    8.90
  -3  -5  -5   79.89    7.80
   3   5   5   96.79    8.50
   3   5   5  105.39   12.20
   3   5   5   94.79    9.80
   3   5   5   93.39    7.50
  -4  -5  -5  356.16   28.70
   4   5   5  401.96   32.00
   4   5   5  409.26   28.60
   4   5   5  379.16   29.30
   4   5   5  362.56   29.60
  -5  -5  -5   26.70    3.90
   5   5   5   42.90    7.30
   5   5   5   28.20    3.90
   5   5   5   17.00    6.90
  -6  -5  -5  215.38   16.80
   6   5   5  196.48   16.60
   6   5   5  229.88   18.40
   6   5   5  220.48   21.20
  -7  -5  -5   10.30    2.20
  -7  -5  -5   18.90    4.10
   7   5   5   20.80    6.50
   7   5   5   11.80    2.90
   7   5   5   10.10    7.40
  -8  -5  -5    4.90    1.90
   8   5   5    8.40    2.80
   8   5   5    3.10    6.40
   9   5   5    9.20    2.50
   9   5   5    3.40    5.40
   9   5   5    8.70    5.50
  10   5   5   30.20    4.90
  10   5   5   23.80    3.10
   9  -6  -5   35.50    4.90
   8  -6  -5    7.50    3.60
  -8   6   5    3.30    2.10
   7  -6  -5   13.70    4.50
  -7   6   5    4.60    3.20
  -7   6   5    6.60    3.90
   6  -6  -5   65.59    8.10
  -6   6   5   31.60   11.20
  -6   6   5   42.40    6.40
  -6   6   5   53.39    7.40
  -5   6   5    8.70    9.10
   4  -6  -5   71.29    7.20
  -4   6   5   62.29   10.10
   3  -6  -5   27.60    5.20
  -3   6   5   25.40    6.80
  -3   6   5   37.00    3.60
   2  -6  -5  254.67   21.80
   2  -6  -5  311.27   22.80
  -2   6   5  310.67   25.40
  -2   6   5  278.77   21.50
   1  -6  -5   59.69    6.30
   1  -6  -5   62.19    6.60
  -1   6   5   59.89   10.90
  -1   6   5   61.49    5.20
   0  -6  -5    5.90    2.80
   0   6   5    4.90    2.10
   0   6   5    0.40    5.80
  -1  -6  -5   22.70    3.50
   1   6   5   20.80    2.80
   1   6   5   34.80    6.20
   1   6   5   14.90    6.60
  -2  -6  -5   26.20    4.30
   2   6   5   44.60    7.70
   2   6   5   20.00    7.50
   2   6   5   42.60   13.90
   2   6   5   30.50    3.80
  -3  -6  -5   59.09    6.10
   3   6   5   63.69   10.20
   3   6   5   52.89    8.80
   3   6   5   56.39    5.40
   4   6   5  189.68   21.50
   4   6   5  218.88   16.60
   4   6   5  232.98   18.80
  -5  -6  -5   51.49    6.00
   5   6   5   53.99    5.40
   5   6   5   43.60    9.80
   5   6   5   48.10    9.40
  -6  -6  -5  178.48   14.80
   6   6   5  195.48   14.60
   6   6   5  181.08   16.90
  -7  -6  -5   46.80    6.90
   7   6   5   51.89    9.20
   7   6   5   51.99    5.60
   8   6   5    2.40    6.50
   8   6   5    9.90    2.80
   8   6   5   13.40    6.40
   9   6   5    2.50    2.10
   9   6   5    1.10    3.70
  10   6   5    9.10    2.00
  -8   7   5    9.60    1.90
   7  -7  -5   -0.50    4.00
  -7   7   5    1.20    3.10
  -7   7   5    0.80    2.60
   6  -7  -5   21.50    4.30
  -6   7   5    9.90    4.00
  -6   7   5   13.20    4.20
   5  -7  -5   55.39    7.30
  -5   7   5   45.50    7.90
   4  -7  -5   62.49    6.80
  -4   7   5   58.59    5.60
  -4   7   5   50.89    9.50
   3  -7  -5   68.99    7.10
  -3   7   5   64.49   10.00
  -3   7   5   58.19    5.70
   2  -7  -5   18.20    3.90
  -2   7   5   14.70    2.30
  -2   7   5   12.80    6.50
   1  -7  -5   87.89    8.00
  -1   7   5   75.89   14.00
  -1   7   5   54.29   14.40
   0  -7  -5  148.89   11.30
   0   7   5  120.39   20.00
  -1  -7  -5  407.76   30.80
   1   7   5  396.36   34.70
   1   7   5  416.96   30.60
   2   7   5   57.19   11.20
   2   7   5   49.90   14.50
   2   7   5   53.09    5.50
  -3  -7  -5   25.80    4.90
   3   7   5   25.70    8.70
   3   7   5   21.50   15.30
   3   7   5   20.90    3.10
  -4  -7  -5  148.09   12.70
   4   7   5  121.39   18.50
   4   7   5  176.98   12.40
  -5  -7  -5   36.80    5.40
   5   7   5   32.90    4.40
   5   7   5   17.60   10.00
   6   7   5  130.89   10.60
  -7  -7  -5    0.60    3.60
   7   7   5    3.80    6.60
  -8  -7  -5  157.08   11.90
   8   7   5  142.99   11.70
   9   7   5    5.40    1.70
   7  -8  -5    5.60    3.20
  -7   8   5    0.00    1.90
  -7   8   5    3.60    2.50
   6  -8  -5    4.70    3.40
  -6   8   5    3.30    3.40
  -6   8   5    3.10    2.80
   5  -8  -5   -1.50    3.50
  -5   8   5    1.00    3.60
  -5   8   5   -1.00    3.80
   4  -8  -5   94.49    8.60
  -4   8   5   81.89   10.50
   3  -8  -5   56.79    6.30
  -3   8   5   48.40    4.80
  -3   8   5   38.30    7.50
   2  -8  -5  895.21   67.49
  -2   8   5  921.31   67.19
  -2   8   5  896.01   69.89
  -1   8   5   14.50    6.60
  -1   8   5    7.00    8.30
   0  -8  -5   58.29    5.80
   0   8   5   45.60    9.20
   0   8   5   33.30   11.70
  -1  -8  -5   32.20    5.00
   1   8   5   29.00    8.80
   1   8   5   39.10    4.50
  -2  -8  -5    2.50    3.30
   2   8   5   -1.10   11.80
   2   8   5   -0.20    7.10
  -3  -8  -5    6.80    3.30
   3   8   5    3.50    7.90
   3   8   5    1.90    2.60
   3   8   5   -1.30   11.80
  -4  -8  -5   25.90    4.00
   4   8   5   14.90   12.90
   4   8   5   18.80    3.20
   4   8   5    3.20    7.80
  -5  -8  -5    3.80    3.60
   5   8   5   13.50   16.20
   5   8   5    1.10    2.60
   5   8   5   -1.70    7.60
  -6  -8  -5  109.69    9.60
   6   8   5   88.19   20.00
   6   8   5  125.59    9.40
  -7  -8  -5   68.59    6.50
   7   8   5   55.39   15.20
   7   8   5   73.39    6.20
   8   8   5  106.09    8.40
   6  -9  -5    2.50    2.60
  -6   9   5    0.80    1.80
  -6   9   5    4.10    2.70
  -5   9   5    1.70    2.90
  -5   9   5   -0.10    2.70
   4  -9  -5   67.79    6.30
  -4   9   5   58.69   15.30
  -4   9   5   55.19    7.50
  -4   9   5   60.89    7.90
   3  -9  -5   91.99    8.00
  -3   9   5   66.59    9.70
  -2   9   5  136.79   14.40
  -2   9   5  140.79   10.80
  -1   9   5   -2.90    6.50
  -1   9   5   11.20    8.20
   0  -9  -5  141.39   14.00
   0   9   5  152.58   11.50
   0   9   5  139.29   15.90
   1   9   5   -0.20    7.20
   2   9   5    7.30   10.70
   2   9   5    6.10    7.20
   2   9   5   12.20    2.70
   3   9   5    3.90   11.30
   3   9   5    2.20    2.50
   3   9   5    4.70    6.60
  -4  -9  -5   46.40    5.10
   4   9   5   19.20   12.40
   4   9   5   30.70    7.80
   4   9   5   36.60    4.60
  -5  -9  -5    9.60    3.30
   5   9   5   -0.30    5.70
   5   9   5    5.40    2.50
   5   9   5   -0.10   10.50
  -6  -9  -5   50.49    5.40
   6   9   5   52.49    5.10
  -7  -9  -5    7.40    2.40
   7   9   5    3.20    7.80
   7   9   5    3.10    1.80
   5 -10  -5    1.20    2.00
  -5  10   5    0.90    1.60
  -5  10   5    0.30    2.10
   4 -10  -5   30.80    3.90
  -4  10   5   34.10    4.40
  -4  10   5   25.20    4.70
  -3  10   5    4.10    3.10
  -3  10   5    7.10    1.90
  -3  10   5    5.90    3.60
   2 -10  -5  273.47   22.00
  -2  10   5  266.57   22.60
  -2  10   5  294.37   21.60
  -2  10   5  320.17   23.80
   1 -10  -5   54.19    5.50
  -1  10   5   48.30    8.10
  -1  10   5   40.80    5.60
  -1  10   5   53.29    4.60
   0 -10  -5  105.29    8.30
   0  10   5   89.49    9.20
   0  10   5   96.09   11.20
  -1 -10  -5    7.60    3.50
   1  10   5    4.20    4.90
   1  10   5    3.00    7.60
  -2 -10  -5  122.69    9.90
   2  10   5  112.29   12.40
  -3 -10  -5    2.80    2.90
   3  10   5    2.70   13.60
   3  10   5    1.50    4.00
  -4 -10  -5    2.50    2.80
   4  10   5    1.00    8.30
   4  10   5    4.70    2.20
   4  10   5    3.20    2.60
  -5 -10  -5   43.20    4.50
   5  10   5   35.00    5.00
  -6 -10  -5   46.50    4.70
   6  10   5   55.29    4.40
  -3  11   5    2.90    2.00
  -3  11   5    2.00    1.50
  -2  11   5   13.60    3.00
   1 -11  -5    6.30    2.50
  -1  11   5    2.70    2.70
  -1  11   5    4.20    1.70
   0 -11  -5   87.39    7.40
   0  11   5   88.99    8.50
  -1 -11  -5   15.80    2.80
   1  11   5    9.40    3.10
  -2 -11  -5   22.20    3.50
   2  11   5   16.80    3.30
  -3 -11  -5    4.70    2.50
  -4 -11  -5    8.40    2.40
   3   8  -6    7.80    3.40
   3   7  -6    4.30    5.70
   3   7  -6    9.30    4.10
   2   7  -6   77.99    9.40
   2   7  -6  111.39    9.50
   1   7  -6    1.40    3.20
   1   7  -6    7.20    4.50
   0   7  -6  143.89   12.10
  -1   7  -6   16.00    3.20
  -2   7  -6    4.60    2.30
  -3   7  -6   76.39    6.60
  -3   7  -6   67.29    5.70
  -4   7  -6    6.30    1.30
  -4   7  -6    8.00    2.10
  -4   7  -6   11.40    5.50
  -5   7  -6    4.00    1.10
  -6   7  -6  324.47   24.30
  -7   7  -6    1.90    1.10
   5   6  -6   10.90    4.10
   4   6  -6    2.90    3.90
   4   6  -6    5.30    4.00
   3   6  -6   11.50    4.30
   2   6  -6   24.70    4.40
   1   6  -6   26.60    4.00
   0   6  -6   54.29    6.10
  -1   6  -6    0.60    2.30
  -1   6  -6    2.70    4.30
  -3   6  -6  172.08   14.00
  -3   6  -6  168.08   13.00
  -5   6  -6    8.70    2.20
  -5   6  -6    8.10    6.20
  -5   6  -6    4.90    1.40
  -6   6  -6  142.89   11.20
  -6   6  -6  148.09   12.50
  -7   6  -6   11.20    1.70
  -7   6  -6   11.50    1.90
  -8   6  -6  133.99   10.30
  -7  -5   6    3.30    3.00
   5   5  -6   10.30    4.50
   4   5  -6   -0.60    4.30
   3   5  -6   87.49    9.70
   3   5  -6  100.39    9.30
   2   5  -6   31.60    4.60
   2   5  -6   43.70    5.20
   1   5  -6    7.80    2.80
   0   5  -6  138.69   11.40
  -1   5  -6   -0.20    2.20
  -2   5  -6   14.10    2.60
  -2   5  -6   14.30    1.80
  -3   5  -6  291.37   22.00
  -3   5  -6  294.67   22.40
  -4   5  -6   13.10    6.20
  -4   5  -6   13.80    2.50
  -4   5  -6   10.30    1.70
  -5   5  -6   22.00    7.80
  -6   5  -6   38.20    3.80
  -6   5  -6   35.60    4.10
  -7   5  -6   64.59    5.60
  -7   5  -6   68.39    5.90
  -8   5  -6  191.88   14.40
  -8   5  -6  184.38   14.30
  -9   5  -6    2.90    1.10
  -9   5  -6    2.60    1.10
  -8  -4   6   26.00    4.30
  -7  -4   6    5.00    3.70
   6   4  -6   81.19    9.70
   5   4  -6    2.50    7.00
   4   4  -6  103.29    9.40
   4   4  -6   89.79   10.60
   3   4  -6    5.60    4.10
   3   4  -6    0.70    3.40
   2   4  -6    2.10    4.00
   2   4  -6    2.30    2.80
   1   4  -6    7.50    2.50
   1   4  -6   14.30    5.30
   0   4  -6  247.78   19.10
  -1   4  -6    3.70    1.90
  -1   4  -6   -0.70    1.20
  -2   4  -6   56.79    4.80
  -2   4  -6   58.09    5.50
  -3   4  -6   -1.10    1.80
  -4   4  -6  327.77   25.40
  -4   4  -6  343.57   25.20
  -5   4  -6    2.40    6.40
  -5   4  -6    7.40    2.10
  -5   4  -6    7.90    1.60
  -6   4  -6   18.90    2.60
  -6   4  -6   18.90    2.30
  -7   4  -6    6.10    1.90
  -7   4  -6    1.60    5.10
  -7   4  -6    3.20    1.60
  -8   4  -6  119.79    9.50
  -8   4  -6  122.59    9.70
  -9   4  -6    8.10    1.40
  -9   4  -6    8.10    1.70
  -9  -3   6    1.80    2.70
   6   3  -6  149.88   14.20
  -6  -3   6  149.88   13.10
   5   3  -6    1.50    4.70
  -5  -3   6    3.60    4.80
   4   3  -6  131.99   11.40
   4   3  -6  113.89    9.80
  -4  -3   6  104.99   10.50
  -3  -3   6   -0.40    3.70
   2   3  -6   -0.50    3.00
   2   3  -6    0.30    2.40
  -2  -3   6    0.70    3.00
   1   3  -6  323.77   25.30
   1   3  -6  339.47   25.20
   0   3  -6   45.80    5.90
   0   3  -6   49.10    4.80
   0  -3   6   45.80    5.70
  -1   3  -6    2.70    1.80
  -1   3  -6    3.30    1.20
   1  -3   6    8.40    2.30
  -2   3  -6  139.99   10.00
  -2   3  -6  130.49   10.30
   2  -3   6  126.19   13.60
   2  -3   6  119.09   11.00
  -3   3  -6    6.60    1.40
  -3   3  -6    8.50    1.80
   3  -3   6   12.30    6.10
  -4   3  -6  302.57   22.60
  -4   3  -6  296.87   22.70
  -5   3  -6    0.40    7.70
  -5   3  -6    2.90    1.30
  -5   3  -6    0.90    1.70
  -6   3  -6   11.40    1.90
  -6   3  -6    3.90    5.90
  -6   3  -6   16.30    2.30
  -7   3  -6   14.90    3.10
  -7   3  -6    7.00    5.20
  -8   3  -6   40.80    4.20
  -8   3  -6   35.60    3.80
  -9   3  -6    9.20    1.60
  -9   3  -6    8.50    2.00
 -10   3  -6  205.48   16.40
 -10   3  -6  228.68   16.30
  -9  -2   6   13.30    3.60
  -7  -2   6   20.30    5.40
   6   2  -6   46.70    7.00
  -6  -2   6   53.59    7.80
   5   2  -6   12.20    5.30
  -5  -2   6   25.00    4.80
   4   2  -6   70.49    8.50
  -4  -2   6   51.19    7.00
   3   2  -6   18.80    3.60
  -3  -2   6   30.70    4.80
  -3  -2   6   20.50    4.50
   2   2  -6    8.50    2.50
  -2  -2   6    5.70    2.30
   1   2  -6  112.69    9.20
  -1  -2   6  109.39    9.50
   0   2  -6  500.75   36.60
   0  -2   6  472.85   36.90
  -1   2  -6  110.89    8.90
   1  -2   6  112.19    9.60
  -2   2  -6  395.36   29.50
   2  -2   6  392.26   30.20
  -3   2  -6    4.90    1.20
  -3   2  -6    2.80    1.50
   3  -2   6    8.10    2.90
  -4   2  -6  931.81   71.89
  -4   2  -6 1003.60   72.09
  -5   2  -6   -2.60    5.80
  -5   2  -6   11.00    1.80
  -5   2  -6   11.30    2.20
  -6   2  -6  271.97   20.90
  -6   2  -6  275.27   20.70
  -7   2  -6   60.89    5.60
  -7   2  -6   63.69    5.20
  -7   2  -6   49.40    9.20
  -8   2  -6    1.20    2.30
  -8   2  -6    0.10    3.90
  -9   2  -6   22.50    3.00
  -9   2  -6   24.90    2.90
 -10   2  -6   84.89    6.20
 -10   2  -6   71.99    6.40
  -9  -1   6    2.30    3.80
  -7  -1   6   16.80    5.20
   6   1  -6  772.02   56.79
  -6  -1   6  718.23   55.99
   5   1  -6   12.10    5.00
  -5  -1   6   13.80    4.40
   4   1  -6   24.90    4.90
  -4  -1   6   34.30    4.90
   3   1  -6    8.80    3.00
  -3  -1   6    7.50    5.10
   2   1  -6  207.28   17.30
  -2  -1   6  236.98   17.50
   1   1  -6   31.50    4.60
  -1  -1   6   32.80    4.50
   0  -1   6   31.60    4.60
   1  -1   6  139.19   11.40
   2  -1   6  278.47   21.70
  -3   1  -6    5.90    1.20
  -3   1  -6    8.30    1.60
   3  -1   6    8.30    3.00
  -4   1  -6  857.61   56.39
  -4   1  -6  712.33   56.29
   4  -1   6  695.73   57.09
  -5   1  -6    4.30    1.30
  -5   1  -6    5.30    1.60
   5  -1   6    4.60    3.30
  -6   1  -6  100.29    7.90
  -6   1  -6  101.59    8.10
  -6   1  -6   94.49   10.90
  -7   1  -6   48.30    7.80
  -7   1  -6   45.30    4.40
  -7   1  -6   43.90    4.70
  -8   1  -6    0.50    4.80
  -8   1  -6   -0.20    1.60
  -9   1  -6   57.69    5.20
  -9   1  -6   59.19    5.60
 -10   1  -6   35.60    4.00
 -10   1  -6   43.30    3.70
  -9   0   6   11.50    5.10
  -8   0   6    5.80    5.00
   6   0  -6    7.00    5.00
  -6   0   6   12.20    4.60
   5   0  -6   -4.00    5.10
  -5   0   6    6.00    4.90
   4   0  -6   53.29    7.30
  -4   0   6   52.59    7.40
  -3   0   6   96.79    8.10
  -3   0   6   70.79   10.90
  -2   0   6  267.27   20.70
  -1   0   6    3.30    2.00
   0   0   6   21.90    3.90
  -1   0  -6    3.10  108.49
   2   0   6  303.67   23.50
   3   0   6   -1.70    2.50
  -4   0  -6   21.90    2.70
   4   0   6   39.80    5.60
  -5   0  -6   14.50    1.80
  -5   0  -6   10.20    2.00
   5   0   6   10.40    3.50
   5   0   6   16.80    5.40
  -6   0  -6   38.90    6.90
  -6   0  -6   37.00    4.40
   6   0   6   42.90    6.90
  -7   0  -6   12.10    2.10
  -7   0  -6   16.00    2.60
  -7   0  -6   11.20    5.20
   7   0   6   18.70    5.30
  -8   0  -6   32.40    4.20
  -8   0  -6   31.60    3.80
  -9   0  -6    1.60    1.70
  -9   0  -6   -0.30    1.90
   9   0   6    6.80    5.50
 -10   0  -6   49.30    4.20
 -10   0  -6   36.80    4.40
  10   0   6   53.79    7.40
  11   0   6    2.30    3.90
  -8   1   6    0.80    4.80
  -7   1   6    4.70    5.40
   6  -1  -6   83.09    8.30
  -6   1   6   89.09    9.30
   5  -1  -6    0.70    4.20
   5  -1  -6   -0.90    4.00
   4  -1  -6  243.68   18.20
   4  -1  -6  218.18   17.90
  -4   1   6  206.68   18.10
   3  -1  -6    2.20    3.40
   3  -1  -6    2.50    2.60
  -3   1   6    5.20    6.20
  -3   1   6    2.30    2.50
  -2   1   6  145.39   12.10
  -1   1   6  112.69   10.50
   0   1   6    3.90    2.20
   0   1   6    5.80    2.40
   1   1   6   60.99    6.10
   2   1   6  110.69   10.20
   3   1   6   -2.10    2.50
  -4  -1  -6  166.18   12.30
  -4  -1  -6  161.18   12.40
   4   1   6  146.99   13.40
  -5  -1  -6   -0.60    1.70
  -5  -1  -6    1.10    1.50
   5   1   6    3.80    4.90
   5   1   6   -2.50    3.10
  -6  -1  -6  170.58   12.40
  -6  -1  -6  153.98   12.20
   6   1   6  142.79   13.90
  -7  -1  -6   24.70    3.00
  -7  -1  -6   23.80    3.20
   7   1   6   30.00    5.90
  -8  -1  -6   46.90    5.20
  -8  -1  -6   54.69    5.40
   8   1   6   59.09    9.20
  -9  -1  -6    0.50    1.90
  -9  -1  -6    2.20    2.00
   9   1   6   -0.50    5.50
 -10  -1  -6   -0.50    1.50
  11   1   6   10.40    3.50
   8  -2  -6   27.40    5.20
  -8   2   6   42.60    5.70
   7  -2  -6    1.60    6.10
  -7   2   6    5.90    6.00
   6  -2  -6    5.30    4.30
  -6   2   6    2.40    4.50
   5  -2  -6   -0.20    3.80
   4  -2  -6  298.97   22.10
   4  -2  -6  271.37   21.30
   4  -2  -6  271.77   22.90
  -4   2   6  308.47   22.30
  -4   2   6  248.98   22.10
   3  -2  -6   18.50    4.20
   3  -2  -6   22.00    4.40
  -3   2   6   23.80    6.20
  -3   2   6   18.00    3.70
   2  -2  -6   14.50    3.90
  -2   2   6   12.20    3.20
  -1   2   6   13.40    2.80
  -1   2   6   12.40    3.10
   0   2   6  516.25   39.80
   0   2   6  534.55   39.60
   1   2   6   78.09    7.30
  -2  -2  -6   70.29  142.09
  -2  -2  -6  -83.29  123.19
   3   2   6   17.10    3.40
  -4  -2  -6  297.97   20.80
  -4  -2  -6  282.57   20.60
   4   2   6  230.68   21.50
   4   2   6  273.57   21.40
  -5  -2  -6    7.00    2.00
  -5  -2  -6    8.00    1.90
   5   2   6   10.90    4.60
   5   2   6    7.40    3.10
  -6  -2  -6   51.59    5.30
  -6  -2  -6   51.79    5.10
   6   2   6   54.09    4.80
   6   2   6   49.30    7.90
  -7  -2  -6   61.09    6.10
  -7  -2  -6   62.49    6.30
   7   2   6   74.89    9.20
  -8  -2  -6  399.06   31.90
  -8  -2  -6  399.06   32.10
   8   2   6  449.86   33.10
   8   2   6  444.06   31.80
  -9  -2  -6    5.90    2.00
  -9  -2  -6    4.50    2.00
   9   2   6   10.90    2.30
 -10  -2  -6    7.50    1.60
 -11  -2  -6   -0.10    0.90
  11   2   6    0.10    3.40
   9  -3  -6    7.60    3.50
   8  -3  -6   32.60    5.10
   7  -3  -6   31.20    4.20
   6  -3  -6    6.40    4.30
   6  -3  -6   11.00    4.50
  -6   3   6   12.10    4.60
  -6   3   6    9.10    3.00
   5  -3  -6    4.60    3.40
  -5   3   6    0.50    4.20
  -5   3   6    0.10    3.20
   4  -3  -6  177.98   16.10
   4  -3  -6  219.88   16.20
   4  -3  -6  189.98   15.10
  -4   3   6  205.48   16.10
  -4   3   6  174.78   16.70
   3  -3  -6   30.40    4.10
   3  -3  -6   29.40    4.90
  -3   3   6   25.90    5.40
  -3   3   6   45.60    6.70
  -3   3   6   18.70    5.80
   2  -3  -6  700.03   52.99
   2  -3  -6  747.13   53.79
  -2   3   6  649.34   53.69
  -2   3   6  748.33   53.89
  -1   3   6    1.20    2.90
   0   3   6  160.08   12.30
   0   3   6  138.39   12.90
   1   3   6   67.29    6.70
   2   3   6  139.09   11.90
  -3  -3  -6    3.80    1.90
   3   3   6    9.20    3.10
   3   3   6   14.40    4.80
  -4  -3  -6    5.80    2.20
   4   3   6    6.30    3.00
  -5  -3  -6  124.89    9.40
  -5  -3  -6  131.79   10.00
   5   3   6  106.79   10.60
   5   3   6  105.29   11.40
  -6  -3  -6  250.87   19.10
  -6  -3  -6  269.77   19.50
   6   3   6  237.88   19.00
   6   3   6  248.38   20.50
  -7  -3  -6  125.99   10.10
  -7  -3  -6  115.79   10.40
   7   3   6  125.19   12.30
   7   3   6  127.79   10.10
  -8  -3  -6  125.89   13.50
  -8  -3  -6  146.09   12.50
   8   3   6  184.28   12.30
   9   3   6   19.80    6.00
   9   3   6   13.50    2.50
 -10  -3  -6   32.50    3.20
   9  -4  -6   13.00    3.40
   8  -4  -6   17.40    3.90
   7  -4  -6   -2.40    3.30
  -7   4   6    0.70    2.40
  -7   4   6   -0.60    3.00
   6  -4  -6   15.00    4.00
  -6   4   6    9.30    3.60
   5  -4  -6   60.09    6.60
  -5   4   6   57.99    7.50
  -5   4   6   60.79    8.00
   4  -4  -6   90.79    7.90
  -4   4   6   92.29    9.50
  -4   4   6   79.09   10.30
   3  -4  -6   20.30    3.50
   3  -4  -6   15.60    4.40
  -3   4   6   18.60    6.20
  -3   4   6   21.90    5.30
   2  -4  -6  252.87   19.70
   2  -4  -6  233.28   18.80
  -2   4   6  225.88   20.30
  -2   4   6  279.47   22.50
  -2   4   6  242.88   20.00
   1  -4  -6    7.70    2.80
  -1   4   6    0.30    5.50
  -1   4   6    5.50    5.40
   0  -4  -6  738.33   58.69
   0   4   6  737.03   59.69
   0   4   6  904.81   62.29
  -1  -4  -6   88.89    7.40
  -1  -4  -6   91.29    7.70
   1   4   6   85.29   10.00
  -2  -4  -6  196.58   15.90
  -2  -4  -6  201.18   16.20
   2   4   6  200.08   17.40
   2   4   6  217.58   16.60
   2   4   6  229.78   19.20
  -3  -4  -6    2.90    3.30
   3   4   6   10.70    5.00
   3   4   6    1.50    4.60
   3   4   6   -1.30    2.60
  -4  -4  -6   29.40    3.90
  -4  -4  -6   15.40    3.40
   4   4   6   30.10    5.60
   4   4   6   24.80    3.40
  -5  -4  -6    7.60    1.60
  -5  -4  -6    6.90    2.80
   5   4   6   12.00    2.20
  -6  -4  -6  165.88   14.00
  -6  -4  -6  163.98   13.30
   6   4   6  180.78   13.30
   6   4   6  176.98   15.40
  -7  -4  -6   66.19    7.00
  -7  -4  -6   70.29    6.40
   7   4   6   82.29    6.60
   7   4   6   81.79    9.90
  -8  -4  -6   11.40    2.20
   8   4   6   26.40    7.80
   8   4   6   19.20    2.80
   9   4   6    1.10    5.10
   9   4   6   -2.10    4.90
   9   4   6    2.00    2.10
  10   4   6   25.90    5.00
   9  -5  -6    4.80    3.00
   8  -5  -6   84.89    7.70
   8  -5  -6   79.19    7.80
   7  -5  -6    1.20    4.20
  -7   5   6    0.70    2.80
  -7   5   6    0.60    3.40
  -6   5   6   16.30    4.50
   5  -5  -6   21.60    4.40
  -5   5   6   18.60    5.40
   4  -5  -6   14.60    3.70
  -4   5   6   16.10    4.60
  -4   5   6    9.20    5.50
   3  -5  -6    7.60    3.70
  -3   5   6    9.70    4.90
  -3   5   6    6.60    6.30
   2  -5  -6  199.18   15.90
   2  -5  -6  200.38   16.80
  -2   5   6  236.78   20.20
  -2   5   6  191.88   17.10
   1  -5  -6   -0.10    2.50
  -1   5   6    2.80    6.50
  -1   5   6    3.30    1.30
  -1   5   6    2.20    5.10
   0  -5  -6  420.56   31.70
   0   5   6  423.56   33.20
  -1  -5  -6   -3.60    2.40
   1   5   6    3.00    5.90
   1   5   6    0.50    1.60
   1   5   6    6.30    5.60
  -2  -5  -6  123.19   10.60
   2   5   6  150.38   12.90
   2   5   6  136.39   14.80
   2   5   6  126.99   10.30
  -3  -5  -6   13.90    2.90
   3   5   6   10.40    6.20
   3   5   6   25.80    5.50
   3   5   6    9.60    3.00
   3   5   6   11.50    2.80
  -4  -5  -6    1.70    2.80
  -4  -5  -6    1.30    2.40
   4   5   6    2.40    3.00
   4   5   6    2.00    5.20
   4   5   6   -5.30    5.00
   4   5   6   -1.60    1.90
  -5  -5  -6    2.30    2.90
   5   5   6    5.00    2.20
   5   5   6    1.40    6.30
   5   5   6   -5.40    6.60
  -6  -5  -6  156.28   12.10
   6   5   6  129.09   12.10
   6   5   6  152.28   13.90
   6   5   6  157.58   16.90
   7   5   6   -1.20    6.30
   7   5   6    4.60    6.00
   7   5   6    2.70    2.50
   8   5   6   47.70   10.10
   8   5   6   74.29    5.90
   8   5   6   51.39    9.10
   9   5   6    1.00    2.00
   9   5   6    1.40    5.10
   9   5   6    0.00    5.00
  10   5   6    1.20    3.10
  10   5   6   10.00    3.80
   8  -6  -6   62.19    5.70
   8  -6  -6   76.09    6.50
  -8   6   6   57.29    6.50
   7  -6  -6   12.70    4.40
  -7   6   6    8.30    3.40
  -7   6   6   10.00    3.20
  -6   6   6  121.79   11.10
  -6   6   6   98.09   10.80
   5  -6  -6   28.50    4.90
   4  -6  -6    8.40    3.90
  -4   6   6    4.40    5.50
   3  -6  -6    4.10    4.00
  -3   6   6   -0.70    5.90
  -2   6   6  178.18   18.50
   1  -6  -6    2.90    2.80
  -1   6   6    0.10    6.20
  -1   6   6    1.70    1.40
   0  -6  -6  308.37   22.10
   0   6   6  242.08   23.30
   0   6   6  320.77   26.30
  -1  -6  -6   28.60    4.50
   1   6   6   29.00    7.70
   1   6   6   34.90    3.70
  -2  -6  -6   81.69    7.30
   2   6   6   84.59   10.50
   2   6   6   81.49    6.90
   2   6   6   73.49   13.00
   3   6   6   -3.40    7.40
   3   6   6    4.70    2.10
  -4  -6  -6   71.79    6.40
   4   6   6   72.69   10.00
   4   6   6   61.89    5.90
   4   6   6   47.40   10.10
  -5  -6  -6   30.80    4.90
   5   6   6   28.70    6.90
   5   6   6   27.10    3.90
   5   6   6   24.70    9.00
  -6  -6  -6   88.79    8.10
   6   6   6   75.59   12.70
   6   6   6   93.99   11.20
   6   6   6   87.59    7.50
   7   6   6   20.40    2.90
   7   6   6   18.60    8.70
   7   6   6    8.00    8.10
   8   6   6   85.49   10.20
   8   6   6   72.29   11.90
   8   6   6   91.29    7.20
   9   6   6    1.50    4.10
   9   6   6    2.30    1.60
   8  -7  -6  151.78   11.10
  -8   7   6  128.39   10.60
  -7   7   6    6.50    2.60
  -7   7   6    0.70    2.60
   6  -7  -6  206.28   15.60
  -6   7   6  189.68   16.30
  -6   7   6  185.98   16.10
  -5   7   6    0.40    5.30
   4  -7  -6   32.90    5.50
  -4   7   6   23.80    6.40
   3  -7  -6    7.20    4.40
  -3   7   6    3.10    5.90
   2  -7  -6    7.80    4.00
  -2   7   6    7.50    2.00
  -2   7   6    6.40    6.50
   1  -7  -6   82.09    7.40
  -1   7   6   70.59   12.30
  -1   7   6   81.99    6.60
   0  -7  -6   93.49    8.30
   0   7   6   75.89   13.30
  -1  -7  -6   55.99    5.60
   1   7   6   38.70    9.20
  -2  -7  -6   84.79    7.30
   2   7   6   76.49    6.80
   2   7   6   63.89   13.40
  -3  -7  -6    7.70    3.30
   3   7   6    6.00    7.60
   3   7   6    6.80   11.10
  -4  -7  -6  114.79    9.80
   4   7   6  118.89   19.80
   4   7   6  126.29    9.50
   4   7   6   80.19   16.40
  -5  -7  -6  139.39   11.00
   5   7   6   98.99   17.70
   5   7   6  128.69   14.00
   5   7   6  133.59   10.70
   5   7   6  151.38   20.10
   6   7   6   -4.10    7.70
   6   7   6    0.20    2.30
  -7  -7  -6   14.50    3.50
   7   7   6    4.80    7.10
   7   7   6    9.70    2.40
   8   7   6   17.40    5.40
   8   7   6   27.20    3.60
   7  -8  -6    4.30    2.90
  -7   8   6    4.10    1.70
  -7   8   6    1.30    2.00
  -6   8   6   50.79    7.40
  -6   8   6   41.10    6.60
   5  -8  -6    2.60    3.50
  -5   8   6   -1.80    3.70
  -5   8   6    0.70    3.50
   4  -8  -6   28.60    5.10
  -4   8   6   29.60    6.00
  -3   8   6   24.40    6.90
   2  -8  -6   24.00    4.70
  -2   8   6   19.60    3.10
  -2   8   6    9.80    5.60
   1  -8  -6  348.47   25.80
  -1   8   6  334.97   25.40
  -1   8   6  331.07   29.40
   0  -8  -6   84.89    8.00
   0   8   6   68.19   12.50
  -1  -8  -6    9.80    3.50
   1   8   6    1.10   10.20
   1   8   6    1.40    6.90
  -2  -8  -6   50.19    5.70
   2   8   6   33.60   11.30
   2   8   6   40.00    9.80
   2   8   6   53.99    4.90
  -3  -8  -6   17.00    3.70
   3   8   6    3.00   10.80
   3   8   6   11.10    8.70
   3   8   6   14.40    2.60
   4   8   6   44.70    4.70
   4   8   6   28.00    9.60
  -5  -8  -6   51.79    5.50
   5   8   6   26.70   12.10
   5   8   6   44.80    5.40
  -6  -8  -6    0.50    3.10
   6   8   6   -1.00   15.70
   6   8   6   -1.60    5.90
   6   8   6    2.30    2.20
   7   8   6   10.70    8.40
   7   8   6    5.20    4.70
   8   8   6   23.80    2.80
   6  -9  -6   44.40    4.60
  -6   9   6   31.20    4.00
  -6   9   6   38.40    4.80
   5  -9  -6   43.60    5.10
  -5   9   6   44.60    5.60
  -5   9   6   42.60    5.60
   4  -9  -6   51.79    5.60
  -4   9   6   51.99    7.10
  -4   9   6   41.60    5.70
   3  -9  -6    5.50    3.50
  -3   9   6    0.90    4.40
   2  -9  -6    2.90    3.80
  -2   9   6    0.30    1.80
  -2   9   6   -2.30    4.60
   0  -9  -6   33.70    5.00
   0   9   6   28.00    7.80
  -1  -9  -6    5.90    4.50
   1   9   6    4.50    6.70
   2   9   6  141.59   17.70
  -3  -9  -6   43.10    5.20
   3   9   6   38.40    4.70
   3   9   6   26.30    8.40
  -4  -9  -6  123.79   10.00
   4   9   6   95.89   14.50
   4   9   6  128.59    9.60
  -5  -9  -6   29.40    4.20
   5   9   6   25.50    3.30
   5   9   6   10.70    6.90
  -7  -9  -6    3.80    1.90
   7   9   6    0.70    1.30
   4 -10  -6   56.89    5.40
  -4  10   6   56.69    6.00
  -4  10   6   57.59    5.70
   3 -10  -6    6.50    2.60
  -3  10   6    4.50    3.00
  -3  10   6    5.30    3.80
   2 -10  -6   61.19    6.20
  -2  10   6   68.79    8.00
  -2  10   6   52.09    7.10
   1 -10  -6    2.90    3.30
  -1  10   6   -1.30    4.30
  -1  10   6    1.20    1.60
   0 -10  -6    6.10    3.20
   0  10   6    6.90    4.90
  -1 -10  -6   56.59    5.60
   1  10   6   53.99    9.00
  -2 -10  -6  121.09    9.80
   2  10   6  111.09   12.90
  -3 -10  -6   21.70    3.40
  -4 -10  -6   43.50    5.20
   4  10   6   27.60    5.40
  -5 -10  -6    5.40    2.30
   2 -11  -6   15.60    2.80
  -2  11   6   15.80    2.90
  -2  11   6   14.50    2.80
   1 -11  -6   40.10    4.40
  -1  11   6   38.70    4.50
  -1  11   6   42.40    5.50
   0 -11  -6    6.50    2.60
   0  11   6    2.60    3.00
  -1 -11  -6    3.20    2.30
   1  11   6   -0.50    2.80
  -2 -11  -6   21.90    3.20
   2  11   6   14.70    3.30
  -3 -11  -6    2.80    1.80
   3   7  -7    3.70    3.50
   3   7  -7   -0.50    2.80
   2   7  -7    4.40    3.30
   2   7  -7   11.80    5.10
   1   7  -7   73.09    7.70
   0   7  -7  112.49   10.40
  -1   7  -7    5.60    3.20
  -2   7  -7  268.17   20.60
  -3   7  -7    4.70    2.00
  -4   7  -7  154.98   12.10
  -5   7  -7    1.40    1.00
   4   6  -7   23.90    4.50
   3   6  -7    4.60    3.80
   3   6  -7   -1.70    3.60
   2   6  -7   81.19    8.50
   1   6  -7  120.09   10.60
   1   6  -7  106.29   10.10
   0   6  -7   41.10    5.60
  -1   6  -7  173.08   13.90
  -2   6  -7   49.30    5.40
  -3   6  -7    7.90    1.50
  -3   6  -7    6.20    2.30
  -4   6  -7  123.19    9.90
  -4   6  -7  118.29    9.40
  -5   6  -7   22.00    3.90
  -5   6  -7   21.00    2.80
  -6   6  -7  245.88   19.00
  -6   6  -7  255.67   18.90
  -7   6  -7   10.20    1.50
   5   5  -7   -2.10    3.70
   4   5  -7  202.78   17.00
   3   5  -7    5.10    4.20
   2   5  -7   67.19    8.60
   1   5  -7   27.90    4.20
   0   5  -7    0.10    2.60
  -1   5  -7   49.50    5.60
  -2   5  -7   47.80    4.20
  -2   5  -7   38.50    5.10
  -3   5  -7   94.69    8.30
  -4   5  -7   30.20    4.40
  -5   5  -7   12.80    2.40
  -5   5  -7   14.20    1.90
  -6   5  -7  236.38   18.10
  -6   5  -7  242.18   18.30
  -7   5  -7    0.00    1.50
  -7   5  -7    2.90    1.60
  -8   5  -7   21.70    2.60
  -8   5  -7   20.80    3.20
  -7  -4   7    0.60    2.80
   6   4  -7   34.60    5.50
   5   4  -7    4.40    4.50
  -5  -4   7   10.70    4.60
   4   4  -7  230.98   20.00
   4   4  -7  249.08   18.80
   3   4  -7    5.20    4.00
   3   4  -7    8.80    4.10
   2   4  -7  131.49   11.70
   2   4  -7  137.89   11.90
   1   4  -7    0.80    2.70
   0   4  -7   10.30    2.80
  -1   4  -7    3.40    1.50
  -1   4  -7   -0.50    2.30
  -2   4  -7   15.80    2.90
  -2   4  -7   13.80    2.00
  -3   4  -7   -0.30    1.30
  -3   4  -7    0.30    2.10
  -4   4  -7  393.06   29.30
  -4   4  -7  387.36   29.50
  -6   4  -7  451.65   33.40
  -6   4  -7  440.96   33.50
  -7   4  -7    0.50    1.80
  -7   4  -7   -1.50    1.40
  -8   4  -7   87.49    7.30
  -8   4  -7   94.29    7.40
  -9   4  -7    3.20    1.20
  -9   4  -7    4.90    1.60
  -8  -3   7    0.40    2.80
   6   3  -7   -2.30    4.50
  -6  -3   7    2.00    4.50
   5   3  -7    3.80    4.90
   4   3  -7  257.67   19.60
   4   3  -7  253.07   20.80
  -4  -3   7  244.18   20.10
   3   3  -7    4.30    3.60
   3   3  -7    3.60    3.30
   2   3  -7  179.08   13.90
   2   3  -7  165.58   14.30
   1   3  -7   32.20    4.60
   1   3  -7   17.90    3.30
   0   3  -7    1.40    4.20
  -1   3  -7   58.59    7.60
  -1   3  -7   58.89    5.20
  -2   3  -7   -1.00    1.30
  -2   3  -7    0.50    2.00
  -3   3  -7   90.49    7.20
  -3   3  -7   88.89    7.70
  -4   3  -7  533.05   41.50
  -4   3  -7  573.74   41.30
  -5   3  -7    1.30    1.40
  -5   3  -7    1.50    1.90
  -6   3  -7  366.76   27.50
  -6   3  -7  359.56   27.40
  -7   3  -7    6.60    1.70
  -7   3  -7    4.50    2.00
  -8   3  -7   54.09    5.00
  -8   3  -7   54.49    4.90
  -9   3  -7    4.90    1.30
  -9   3  -7    0.40    1.50
  -8  -2   7   18.80    4.00
  -7  -2   7    4.70    4.50
   6   2  -7    8.60    5.30
   5   2  -7   21.70    5.90
  -5  -2   7   28.20    5.20
   4   2  -7   98.29   10.50
   4   2  -7  101.19    8.70
  -4  -2   7   88.59    9.50
   3   2  -7   25.60    4.30
   3   2  -7   24.40    4.10
   2   2  -7  234.28   18.50
   1   2  -7   18.60    3.80
   1   2  -7   14.10    2.70
  -1  -2   7   15.40    3.30
   0   2  -7  249.78   18.30
   0  -2   7  223.28   18.90
  -1   2  -7    9.60    2.20
  -1   2  -7   11.50    1.80
   1  -2   7    6.30    2.80
  -2   2  -7   22.40    3.30
  -2   2  -7   20.50    2.30
   2  -2   7   19.30    3.70
  -3   2  -7   28.50    3.20
  -3   2  -7   29.10    3.50
  -4   2  -7  109.29    8.80
  -4   2  -7  114.39    9.00
  -5   2  -7   56.49    5.20
  -5   2  -7   55.19    5.00
  -6   2  -7  306.37   23.90
  -6   2  -7  325.77   24.00
  -7   2  -7    6.30    1.80
  -7   2  -7    4.30    2.00
  -8   2  -7   53.59    5.00
  -9   2  -7    4.90    1.50
  -9   2  -7    1.10    2.90
 -10   2  -7   19.70    2.20
 -10   2  -7   18.40    2.30
  -9  -1   7    2.50    3.00
  -7  -1   7    9.60    4.80
  -6  -1   7   30.70    7.60
   5   1  -7   34.40    6.40
  -5  -1   7   38.30    7.10
   4   1  -7   40.70    6.00
  -4  -1   7   46.40    6.80
   3   1  -7    0.90    3.20
  -3  -1   7    5.40    4.40
   2   1  -7  416.76   30.40
  -2  -1   7  422.46   30.60
  -2  -1   7  353.86   30.90
   1   1  -7   -0.80    2.00
  -1  -1   7    5.00    5.00
  -1  -1   7   -0.60    2.60
   0   1  -7   12.60    2.10
   0  -1   7    9.80    3.20
  -1   1  -7   77.39    6.70
   1  -1   7   77.59    7.60
  -2   1  -7   18.60    2.10
  -2   1  -7   17.10    2.40
   2  -1   7   13.20    4.20
  -3   1  -7    2.50    1.60
  -3   1  -7    3.60    1.30
   3  -1   7    1.50    3.00
  -4   1  -7   25.60    3.10
  -4   1  -7   27.40    3.30
  -5   1  -7    5.90    1.50
  -5   1  -7    5.10    1.80
  -6   1  -7  161.48   13.40
  -6   1  -7  183.58   13.50
  -7   1  -7   33.10    3.70
  -7   1  -7   29.60    3.90
  -8   1  -7   13.90    2.20
  -8   1  -7   15.90    2.50
  -9   1  -7    9.10    1.80
  -9   1  -7    9.70    2.00
 -10   1  -7   12.90    2.20
 -10   1  -7   11.80    1.70
  -9   0   7    2.50    3.30
  -8   0   7  152.98   13.20
  -7   0   7    9.40    5.20
   6   0  -7   10.50    5.40
  -6   0   7    9.20    4.80
   5   0  -7   77.99   10.10
  -5   0   7   80.29    8.90
   4   0  -7    0.30    4.30
  -4   0   7    0.60    4.70
   3   0  -7  213.58   16.30
  -3   0   7  186.18   16.80
   2   0  -7  117.89    9.40
  -2   0   7  111.49   11.10
  -2   0   7   89.59   11.00
   1   0  -7   -1.10    1.90
  -1   0   7    4.20    6.00
  -1   0   7   -0.70    2.30
  -1   0   7   -5.90    2.70
   0   0  -7  287.97   23.60
   0   0  -7  336.17   23.60
   0   0   7  317.27   24.10
   0   0   7  302.77   24.10
  -1   0  -7   17.50    2.30
  -1   0  -7   19.80    3.00
   1   0   7   18.20    3.30
  -2   0  -7  249.78   17.30
  -2   0  -7  219.18   16.90
   2   0   7  195.08   17.70
  -3   0  -7   32.80    3.60
  -3   0  -7   35.80    3.50
  -4   0  -7  101.39    7.60
  -4   0  -7   85.89    7.50
   4   0   7   86.89    9.90
  -5   0  -7   96.49    7.90
  -6   0  -7   86.39    7.50
  -6   0  -7   93.99    7.60
  -7   0  -7   14.80    2.40
  -7   0  -7   14.10    2.30
   7   0   7   22.40    6.10
  -8   0  -7  295.07   22.20
  -8   0  -7  291.37   22.10
   8   0   7  287.47   23.90
  -9   0  -7   -0.30    1.70
  -9   0  -7   -0.20    1.80
 -10   0  -7   57.49    4.90
 -10   0  -7   52.39    4.70
  -8   1   7  193.78   15.90
  -7   1   7   37.20    6.40
  -6   1   7   49.80    7.80
   5  -1  -7   13.30    5.10
  -5   1   7   26.10    5.30
   4  -1  -7    1.70    4.20
  -4   1   7    5.70    7.00
   3  -1  -7  171.28   14.00
  -3   1   7  162.18   14.90
   2  -1  -7  114.39    9.50
  -2   1   7  103.89   11.40
   1  -1  -7    5.20    2.10
   1  -1  -7    5.00    2.10
  -1   1   7   11.70    5.70
  -1   1   7    9.30    2.90
  -1   1   7    3.80    2.80
   0  -1  -7  744.53   53.09
   0   1   7  674.33   53.39
  -1  -1  -7   77.79    6.60
   1   1   7   74.69    7.70
   2   1   7  296.37   23.20
  -3  -1  -7    2.20    1.50
   3   1   7   10.20    5.50
   3   1   7    6.30    3.10
  -4  -1  -7   14.60    2.10
  -4  -1  -7   14.70    2.10
   4   1   7   19.60    5.60
  -5  -1  -7   -1.70    1.60
  -5  -1  -7   -1.10    1.50
   5   1   7   10.50    5.30
  -6  -1  -7   29.10    3.50
  -6  -1  -7   23.90    3.10
   6   1   7   39.20    6.70
  -7  -1  -7    1.10    1.70
  -7  -1  -7    2.80    2.00
   7   1   7    2.60    5.90
  -8  -1  -7  506.05   39.90
  -8  -1  -7  518.95   40.70
   8   1   7  572.14   41.90
  -9  -1  -7    2.20    1.70
  -9  -1  -7    0.80    1.80
   9   1   7    8.00    5.60
 -10  -1  -7  125.69   10.10
  10   1   7  138.99   11.80
  -8   2   7   60.79    7.60
  -7   2   7   10.60    5.60
  -6   2   7   33.30    5.90
   5  -2  -7    0.80    4.10
  -5   2   7    4.90    4.80
   4  -2  -7    7.40    4.10
  -4   2   7   15.00    5.70
   3  -2  -7   36.30    5.00
   3  -2  -7   34.60    4.90
  -3   2   7   52.59    8.40
   2  -2  -7    5.00    2.50
  -2   2   7    9.90    5.50
  -2   2   7    0.60    2.60
   1  -2  -7   -0.40    1.90
  -1   2   7    1.90    2.70
  -1   2   7   -0.10    3.20
   0  -2  -7  535.15   38.50
   0   2   7  549.54   38.90
   0   2   7  431.76   39.80
   0   2   7  527.45   39.00
  -1  -2  -7   22.20    2.80
   1   2   7   21.10    3.80
   1   2   7   32.60    7.20
  -2  -2  -7  555.54   42.00
   2   2   7  583.44   42.60
   2   2   7  487.05   43.00
   2   2   7  616.84   44.10
  -3  -2  -7    1.00    1.20
  -3  -2  -7    2.50    1.70
   3   2   7    0.60    2.80
  -4  -2  -7   55.79    5.70
  -4  -2  -7   64.79    5.30
   4   2   7   68.19    8.90
   4   2   7   54.19    7.10
  -5  -2  -7  262.67   18.80
  -5  -2  -7  248.68   18.50
   5   2   7  217.38   20.20
  -6  -2  -7    5.60    2.30
  -6  -2  -7    3.50    1.70
   6   2   7   11.10    6.00
  -7  -2  -7   58.69    5.50
  -7  -2  -7   62.89    6.20
   7   2   7   73.99   10.00
  -8  -2  -7  126.39   10.50
  -8  -2  -7  132.29   10.30
  -9  -2  -7    3.40    1.70
  -9  -2  -7    2.60    1.90
   9   2   7   12.10    5.60
 -10  -2  -7  116.39    9.70
  10   2   7  140.99   11.60
   7  -3  -7    0.80    3.70
  -7   3   7    1.30    5.00
   6  -3  -7   12.10    5.40
  -6   3   7   11.80    5.50
   5  -3  -7    8.60    4.10
  -5   3   7   13.00    5.10
   4  -3  -7   21.40    4.20
   4  -3  -7   24.20    4.30
  -4   3   7   24.90    6.10
   3  -3  -7   10.50    3.30
  -3   3   7    3.10    5.00
  -3   3   7    9.10    5.40
  -2   3   7   17.60    7.30
  -2   3   7   20.40    3.40
  -2   3   7   15.80    4.00
   1  -3  -7  189.78   16.10
  -1   3   7  201.18   18.40
  -1   3   7  231.88   20.00
  -1   3   7  215.98   17.30
   0  -3  -7  523.05   43.40
   0  -3  -7  528.95   43.20
   0   3   7  593.84   44.20
   0   3   7  574.74   47.00
   0   3   7  637.84   43.90
   0   3   7  620.34   46.60
  -1  -3  -7  180.58   13.70
  -1  -3  -7  145.89   13.40
   1   3   7  196.38   14.40
   1   3   7  188.58   17.60
  -2  -3  -7  357.36   26.90
   2   3   7  373.26   27.40
   2   3   7  306.57   28.20
   2   3   7  382.16   29.50
  -3  -3  -7   -1.50    2.00
  -3  -3  -7    0.00    1.40
   3   3   7   -6.10    5.50
   3   3   7   -3.70    3.40
  -4  -3  -7   36.20    4.80
   4   3   7   42.50    6.90
  -5  -3  -7  408.36   30.60
  -6  -3  -7   35.80    4.00
  -6  -3  -7   37.90    4.30
   6   3   7   44.80    7.20
  -7  -3  -7   10.20    2.00
  -7  -3  -7   10.70    2.70
   7   3   7   16.00    6.30
  -8  -3  -7  136.59   11.00
  -8  -3  -7  133.09   11.30
   8   3   7  156.98   13.70
   9   3   7    7.40    5.40
 -10  -3  -7   79.19    7.20
  10   3   7   90.09    9.30
  10   3   7  110.09    9.20
   8  -4  -7    8.80    3.70
   7  -4  -7    5.40    3.80
   6  -4  -7   35.50    6.00
  -6   4   7   44.70    7.00
   5  -4  -7   17.90    4.20
  -5   4   7   17.90    5.20
   4  -4  -7   49.70    6.30
  -4   4   7   40.60    8.30
  -4   4   7   57.29    8.80
  -3   4   7   78.99   10.70
   2  -4  -7    3.80    3.40
  -2   4   7    1.40    6.20
  -2   4   7    1.50    5.40
   1  -4  -7   80.79    7.30
  -1   4   7   62.59   10.00
  -1   4   7   82.09   12.40
   0  -4  -7  164.58   13.50
   0   4   7  210.58   18.30
   0   4   7  152.88   16.20
  -1  -4  -7  202.78   17.60
  -1  -4  -7  210.98   17.90
   1   4   7  256.77   18.40
   1   4   7  236.38   19.80
   1   4   7  259.27   22.00
  -2  -4  -7  346.37   26.90
  -2  -4  -7  326.67   26.50
   2   4   7  384.66   27.40
   2   4   7  368.76   29.90
   2   4   7  342.07   28.20
  -3  -4  -7    5.20    2.50
   3   4   7    1.70    3.00
   3   4   7    9.40    5.70
   3   4   7    0.90    5.00
  -4  -4  -7  123.49   10.20
   4   4   7  113.49   12.60
   4   4   7  111.99   13.00
  -5  -4  -7    0.50    1.20
  -5  -4  -7    2.70    2.80
   5   4   7    3.80    5.70
  -6  -4  -7   19.60    3.50
  -6  -4  -7   19.30    2.80
   6   4   7   31.60    6.50
  -7  -4  -7   62.69    5.50
  -7  -4  -7   67.49    6.40
  -8  -4  -7   25.20    3.20
   8   4   7   30.20    7.00
   8   4   7   38.70    6.60
   9   4   7   17.80    5.40
  10   4   7   28.20    5.80
   8  -5  -7   21.60    3.70
   7  -5  -7   29.80    4.70
   6  -5  -7   91.49    8.40
  -6   5   7   74.79    8.30
   5  -5  -7    5.00    4.20
  -5   5   7    6.30    4.40
   4  -5  -7   53.19    6.40
  -4   5   7   48.00    9.00
  -4   5   7   48.50    8.30
   3  -5  -7  116.99   11.20
  -3   5   7  144.69   14.90
  -3   5   7  136.69   13.00
  -2   5   7   -3.60    6.10
   1  -5  -7   50.49    5.80
  -1   5   7   55.09    7.80
  -1   5   7   38.10    9.10
   0  -5  -7   38.40    4.70
   0   5   7   27.10    8.50
   0   5   7   43.90    7.50
  -1  -5  -7   95.89    8.40
   1   5   7   90.69   13.60
   1   5   7   93.79   11.30
  -2  -5  -7   62.39    6.30
   2   5   7   71.69   12.10
   2   5   7   75.29    9.60
  -3  -5  -7   16.00    3.40
  -3  -5  -7   17.90    3.60
   3   5   7    6.90    6.30
  -4  -5  -7  145.99   12.90
  -4  -5  -7  150.88   12.30
   4   5   7  169.88   14.40
   4   5   7  149.69   16.40
  -5  -5  -7   17.30    3.60
   5   5   7   24.30    6.60
   6   5   7   20.40    7.30
   6   5   7   30.50    3.70
   6   5   7   45.00    7.10
   8   5   7   23.10    5.90
   8   5   7   -1.20    5.70
   9   5   7    7.90    4.70
   9   5   7    1.10    4.60
   8  -6  -7    4.70    2.70
   7  -6  -7   40.50    6.20
  -7   6   7   26.80    3.60
  -7   6   7   28.50    3.90
   6  -6  -7   98.99    8.30
  -6   6   7   72.09    9.10
  -6   6   7   80.59    8.70
   5  -6  -7   19.80    5.00
  -5   6   7   15.00    5.60
   4  -6  -7   13.10    4.10
  -4   6   7    8.30    5.80
   3  -6  -7   36.50    5.60
  -3   6   7   25.10    7.20
   2  -6  -7   50.09    6.10
  -2   6   7   47.20    8.40
  -2   6   7   39.20    8.80
   1  -6  -7  140.99   11.50
  -1   6   7  134.79   13.50
  -1   6   7  146.29   16.70
   0  -6  -7    6.40    3.00
   0   6   7   11.40    6.70
   0   6   7    6.70    6.40
  -1  -6  -7   20.30    3.90
   1   6   7   16.90    7.40
   1   6   7    7.10    7.30
  -2  -6  -7   31.50    4.80
   2   6   7   42.60    7.80
   2   6   7   28.90    8.00
  -3  -6  -7   12.50    3.40
   3   6   7    9.70    7.60
   3   6   7    9.90    2.20
   3   6   7   12.00    6.60
  -4  -6  -7  232.18   18.20
   4   6   7  232.78   23.10
   4   6   7  239.78   20.20
  -5  -6  -7   -0.60    3.40
   5   6   7    4.10    6.30
   5   6   7   -2.30    2.00
   5   6   7    0.10    7.10
   6   6   7  211.78   22.40
   6   6   7  231.18   17.50
   6   6   7  242.08   19.60
   7   6   7   15.20    2.40
   7   6   7    6.00    6.80
   7   6   7   13.90    6.10
   8   6   7   -0.70    7.30
   8   6   7    4.60    5.20
   9   6   7   18.90    4.70
   9   6   7   33.10    5.70
   7  -7  -7    6.70    3.00
  -7   7   7    1.60    1.90
   6  -7  -7   87.49    7.80
  -6   7   7   75.29    8.40
   5  -7  -7   14.60    4.00
  -5   7   7    9.90    4.40
   4  -7  -7  404.66   33.50
  -4   7   7  469.45   36.70
   3  -7  -7    4.50    4.10
  -3   7   7    3.20    5.80
   2  -7  -7   36.80    5.90
  -2   7   7   32.40    8.20
   1  -7  -7   47.40    5.80
  -1   7   7   32.80    8.50
   0  -7  -7   11.10    3.30
   0   7   7    5.60    7.10
  -1  -7  -7    6.30    3.70
   1   7   7    1.50    7.00
   1   7   7   -5.40    6.10
  -2  -7  -7    5.60    3.30
   2   7   7    2.60    6.80
  -3  -7  -7    5.30    3.30
   3   7   7   -2.50    6.80
   3   7   7    1.30    2.00
   3   7   7   -4.80    6.80
  -4  -7  -7  291.57   22.10
   4   7   7  272.77   27.00
   4   7   7  285.97   21.80
   4   7   7  300.97   24.10
  -5  -7  -7  131.29   10.20
   5   7   7   97.39   16.10
   5   7   7  110.19   16.70
   5   7   7  108.49    9.30
  -6  -7  -7   61.39    6.20
   6   7   7   48.50   10.30
   6   7   7   60.59    9.70
   6   7   7   58.79    5.30
   7   7   7    3.80    5.60
   7   7   7    1.10    1.90
   7   7   7   -1.20    6.10
   8   7   7    1.30    4.20
   6  -8  -7   57.59    5.80
  -6   8   7   50.09    5.70
   5  -8  -7   26.70    4.00
  -5   8   7   15.90    3.90
  -5   8   7   18.40    4.20
   4  -8  -7   37.20    5.30
  -4   8   7   28.80    5.90
   3  -8  -7    7.10    4.00
  -3   8   7    4.90    5.20
   2  -8  -7  331.07   24.20
  -2   8   7  292.77   26.80
  -1   8   7   53.69   10.70
   0  -8  -7   17.10    3.70
   0   8   7   13.40    7.20
  -1  -8  -7   30.30    5.30
   1   8   7   16.90    8.20
  -2  -8  -7   60.09    7.10
   2   8   7   38.90    9.70
  -3  -8  -7   31.60    4.80
   3   8   7   22.30    8.40
   3   8   7   34.80    3.90
  -4  -8  -7  126.89    9.90
   4   8   7   92.89   15.40
  -5  -8  -7    7.20    3.20
   5   8   7   -2.40    7.00
   5   8   7    3.70    1.80
  -6  -8  -7   16.90    3.20
   6   8   7    6.30    6.50
   6   8   7   18.40    2.60
   7   8   7    3.90    1.30
   7   8   7    2.00    4.30
   5  -9  -7    2.50    2.60
  -5   9   7   -1.00    2.20
  -5   9   7    0.70    2.30
  -4   9   7  114.29   10.90
   3  -9  -7   21.50    3.80
  -3   9   7   18.60    4.90
   2  -9  -7   99.49    8.70
  -2   9   7   89.59   10.90
   1  -9  -7   16.20    4.10
  -1   9   7    2.50    5.30
   0  -9  -7   32.90    4.90
   0   9   7   23.30    7.00
  -1  -9  -7    0.70    2.90
   1   9   7   -2.60    5.90
  -2  -9  -7    2.70    3.50
   2   9   7    1.60    5.80
  -3  -9  -7    8.60    3.30
   3   9   7    2.90    6.70
  -4  -9  -7   65.39    5.80
   4   9   7   40.50    9.10
   5   9   7   -1.90    5.10
   6   9   7    2.00    3.80
   4 -10  -7    5.10    2.20
  -4  10   7    4.30    2.00
  -4  10   7    2.10    2.00
   3 -10  -7    5.70    2.50
  -3  10   7    0.60    2.60
  -3  10   7    3.40    2.60
   2 -10  -7   53.09    5.50
  -2  10   7   55.49    7.00
   1 -10  -7    7.40    5.40
  -1  10   7    3.80    4.20
   0 -10  -7    9.40    3.30
   0  10   7   -0.20    4.10
  -1 -10  -7    5.40    3.00
   1  10   7    2.60    4.60
  -2 -10  -7    3.00    2.50
   2  10   7    2.00    4.90
  -3 -10  -7   29.80    4.20
   3  10   7   17.70    5.50
  -4 -10  -7   20.40    3.10
  -5 -10  -7    9.30    2.20
   5  10   7    3.80    2.30
   1 -11  -7    6.20    2.10
  -1  11   7    3.10    1.60
  -1  11   7    3.20    2.30
   0 -11  -7   45.80    4.60
   0  11   7   44.90    5.50
  -1 -11  -7    7.80    2.30
   1  11   7    2.60    2.80
  -2 -11  -7    6.40    2.10
   2  11   7    4.00    2.50
   2   7  -8    9.30    2.60
   1   7  -8   -1.30    3.90
   0   7  -8  121.39   10.20
  -1   7  -8    2.80    2.30
  -2   7  -8    2.20    3.20
   4   6  -8   10.50    2.70
   4   6  -8    6.00    2.90
   3   6  -8   -0.50    2.90
   3   6  -8   -1.00    3.00
   2   6  -8   84.99    8.80
   2   6  -8   94.99    8.60
   1   6  -8    2.80    3.10
   0   6  -8    7.90    2.90
  -1   6  -8  111.99    9.60
  -2   6  -8    0.80    2.10
  -3   6  -8   31.20    4.30
  -4   6  -8    1.20    1.10
  -4   6  -8    3.10    1.90
  -5   6  -8   22.80    3.00
  -5   6  -8   22.80    2.50
  -6   6  -8  121.49    9.10
  -6   6  -8  116.69    9.20
   5   5  -8    0.30    3.10
   4   5  -8    3.80    5.60
   3   5  -8    0.60    3.80
   2   5  -8   84.29    8.00
   2   5  -8   74.59    8.40
   1   5  -8    3.30    3.10
   0   5  -8  193.98   15.60
  -1   5  -8   82.89    7.70
  -3   5  -8    2.50    1.50
  -3   5  -8    4.00    2.40
  -4   5  -8    9.30    2.20
  -5   5  -8    6.60    1.50
  -5   5  -8    7.80    2.00
  -6   5  -8  111.79    8.90
  -6   5  -8  115.39    9.10
  -7   5  -8   19.10    2.40
  -7   5  -8   15.70    1.90
   5   4  -8    3.70    2.90
   5   4  -8    2.20    3.90
   4   4  -8    3.80    4.20
   4   4  -8    5.30    3.20
   3   4  -8    2.00    4.00
   2   4  -8    9.60    3.80
   2   4  -8   14.40    4.00
   1   4  -8   -1.30    3.00
   1   4  -8   -1.50    6.70
   0   4  -8  183.58   14.80
  -1   4  -8   -1.10    1.30
  -1   4  -8   -1.70    2.50
  -2   4  -8   35.90    4.70
  -2   4  -8   48.00    5.20
  -3   4  -8    1.10    1.60
  -3   4  -8    2.00    3.20
  -4   4  -8   24.30    3.10
  -5   4  -8    4.50    1.60
  -5   4  -8    5.00    2.10
  -6   4  -8   48.70    4.50
  -6   4  -8   46.40    4.70
  -7   4  -8    2.10    1.50
  -7   4  -8    0.90    1.70
  -8   4  -8  306.77   22.80
  -8   4  -8  301.57   22.90
  -7  -3   8    3.50    2.70
   6   3  -8   14.40    4.50
   5   3  -8    1.10    4.40
  -5  -3   8   -1.70    4.10
   4   3  -8    6.90    4.90
   4   3  -8   16.50    4.80
  -4  -3   8   22.20    5.10
   3   3  -8   73.39   10.40
   3   3  -8   81.39    9.40
   2   3  -8   91.79    9.00
   2   3  -8   89.99    9.00
   1   3  -8    5.20    3.10
   1   3  -8   12.00    4.30
   0   3  -8  145.39   12.00
  -1   3  -8    2.40    2.60
  -1   3  -8    2.60    1.90
  -2   3  -8  186.78   14.70
  -2   3  -8  194.78   15.20
  -3   3  -8    3.00    2.30
  -3   3  -8   -1.00    1.50
  -4   3  -8  200.18   15.40
  -4   3  -8  194.38   15.10
  -5   3  -8   -0.10    1.50
  -5   3  -8    3.30    2.10
  -6   3  -8   10.00    2.20
  -6   3  -8    9.80    1.90
  -7   3  -8    2.00    1.70
  -7   3  -8    2.40    1.80
  -8   3  -8   15.60    2.20
  -8   3  -8   14.20    2.00
   6   2  -8   60.19    8.80
  -6  -2   8   80.49    7.90
   5   2  -8    1.90    4.70
  -5  -2   8    4.30    5.20
   4   2  -8   44.30    6.40
   4   2  -8   68.89    9.50
   3   2  -8   38.90    5.60
   3   2  -8   43.00    5.00
  -3  -2   8   43.60    6.80
   2   2  -8    6.40    3.40
   1   2  -8    3.70    4.00
   1   2  -8    1.60    2.70
   0   2  -8   10.50    2.70
  -1   2  -8    1.40    2.20
  -1   2  -8    1.60    2.20
  -2   2  -8  114.59    9.40
  -2   2  -8  120.29    9.80
  -3   2  -8    1.50    1.60
  -3   2  -8    0.10    2.10
  -4   2  -8  168.68   13.60
  -4   2  -8  178.38   13.40
  -5   2  -8   67.39    6.20
  -5   2  -8   73.39    6.10
  -6   2  -8    5.50    1.90
  -6   2  -8    5.30    2.00
  -7   2  -8    0.80    1.80
  -7   2  -8    0.40    1.80
  -8   2  -8   11.90    2.00
  -8   2  -8   13.20    2.10
  -9   2  -8   14.60    2.30
  -9   2  -8   12.10    1.80
  -7  -1   8    5.60    5.10
   6   1  -8  190.38   17.90
  -6  -1   8  222.58   17.20
   5   1  -8    6.60    3.50
   5   1  -8    4.50    5.00
  -5  -1   8   12.50    5.20
   4   1  -8   40.10    6.40
  -4  -1   8   45.70    7.10
   3   1  -8    2.40    3.90
  -3  -1   8    6.80    4.70
   2   1  -8    3.40    3.10
  -2  -1   8    6.40    5.40
   1   1  -8   50.79    5.80
   1   1  -8   61.59    6.40
  -1  -1   8   70.59    8.30
   0   1  -8   36.90    5.00
   0   1  -8   40.40    4.50
  -1   1  -8   20.60    2.70
  -1   1  -8   21.50    3.10
  -2   1  -8   35.20    4.00
  -3   1  -8   -0.30    2.00
  -3   1  -8   -1.20    1.60
  -4   1  -8  314.47   23.40
  -4   1  -8  302.47   23.40
  -5   1  -8   35.40    3.90
  -5   1  -8   29.50    3.90
  -6   1  -8   52.59    5.00
  -6   1  -8   55.59    5.20
  -7   1  -8    8.50    2.00
  -7   1  -8   13.90    2.20
  -8   1  -8   33.00    3.50
  -8   1  -8   23.00    2.90
  -9   1  -8   -0.70    1.40
  -9   1  -8    2.00    1.50
  -7   0   8   11.30    4.50
   6   0  -8  208.18   19.30
  -6   0   8  243.28   18.60
   5   0  -8   20.00    7.30
   4   0  -8   38.90    6.30
  -4   0   8   42.50    7.50
   3   0  -8    1.00    3.90
  -3   0   8   12.40    5.40
   2   0  -8    0.60    3.50
  -2   0   8   -8.20    8.00
   1   0  -8    5.30    2.60
   1   0  -8    1.10    2.10
  -1   0   8   11.40    5.40
   0   0  -8    8.60    2.40
   0   0  -8   12.70    2.60
  -1   0  -8   99.59    8.10
  -1   0  -8   91.89    8.20
  -2   0  -8  456.25   34.70
  -2   0  -8  422.56   34.70
   2   0   8  513.65   37.30
  -3   0  -8    0.40    1.70
  -3   0  -8    0.80    2.70
  -4   0  -8  530.05   39.00
  -4   0  -8  511.45   39.00
  -5   0  -8    2.80    1.80
  -5   0  -8    2.80    1.70
  -6   0  -8   71.99    6.20
  -6   0  -8   68.89    6.30
  -7   0  -8   11.60    2.70
  -7   0  -8   10.00    2.60
  -8   0  -8    7.40    1.90
  -8   0  -8    6.50    2.10
  -9   0  -8    0.00    1.50
  -9   0  -8   -0.20    1.40
  -7   1   8   14.30    5.00
  -6   1   8  120.39   11.40
   5  -1  -8    3.40    4.70
  -5   1   8    5.10    4.80
   4  -1  -8   69.69    9.00
  -4   1   8   60.79    9.20
   3  -1  -8   50.59    7.70
  -3   1   8   61.49    9.30
   2  -1  -8  161.48   12.80
  -2   1   8  140.69   14.40
   1  -1  -8    0.90    2.30
   1  -1  -8    2.20    2.20
  -1   1   8    0.20    5.90
   0  -1  -8    4.90    2.20
   0  -1  -8    7.40    2.30
   0   1   8   16.50    6.90
   0   1   8    2.30    3.40
  -1  -1  -8  224.78   16.70
  -1  -1  -8  199.78   16.60
   1   1   8  208.58   19.80
   1   1   8  220.78   17.70
   1   1   8  225.68   20.20
  -2  -1  -8  334.57   26.50
  -2  -1  -8  372.16   26.60
   2   1   8  360.96   29.20
   2   1   8  336.97   28.80
  -3  -1  -8    0.40    1.60
  -3  -1  -8   -1.60    1.70
   3   1   8    3.80    6.70
  -4  -1  -8   73.19    6.40
  -4  -1  -8   69.89    6.00
   4   1   8   66.49   11.10
  -5  -1  -8   78.29    7.10
  -5  -1  -8   79.19    6.70
   5   1   8   86.79   11.20
  -6  -1  -8  209.88   15.50
  -6  -1  -8  209.58   15.80
   6   1   8  182.08   18.10
  -7  -1  -8   13.00    2.50
  -8  -1  -8   21.20    2.90
  -8  -1  -8   21.50    3.20
   8   1   8   30.90    6.70
  -9  -1  -8    4.20    1.70
  -9  -1  -8    3.60    1.50
   9   1   8   12.30    5.20
 -10  -1  -8   25.10    2.50
  10   1   8   30.30    5.20
  -7   2   8   20.80    5.40
  -6   2   8   50.09    7.90
   5  -2  -8   14.20    4.80
  -5   2   8    4.00    5.00
   4  -2  -8  342.77   28.40
  -4   2   8  377.86   28.60
   3  -2  -8   10.80    4.50
  -3   2   8   19.30    6.40
   2  -2  -8   60.69    6.80
  -2   2   8   60.59   12.90
   1  -2  -8   10.50    2.70
  -1   2   8   22.90    6.80
  -1   2   8    6.00    3.50
   0  -2  -8   10.70    2.30
   0  -2  -8    9.90    2.60
   0   2   8   16.60    6.50
   0   2   8   15.20    3.70
   0   2   8   24.00    7.50
   0   2   8   17.20    3.80
  -1  -2  -8   36.00    4.50
  -1  -2  -8   30.00    3.90
   1   2   8   29.30    7.70
   1   2   8   49.40    8.30
   1   2   8   38.60    5.80
  -2  -2  -8   24.40    3.50
  -2  -2  -8   28.20    3.20
   2   2   8   38.00    7.70
   2   2   8   31.70    6.70
  -3  -2  -8   55.39    5.40
  -3  -2  -8   50.49    4.90
   3   2   8   64.29   10.90
   3   2   8   62.29    9.90
  -4  -2  -8  130.89    9.40
  -4  -2  -8  100.49    9.00
  -5  -2  -8   90.19    7.20
  -5  -2  -8   94.19    7.70
   5   2   8   69.59   11.10
  -6  -2  -8   12.50    2.10
  -6  -2  -8   13.70    2.80
   6   2   8   24.20    6.80
  -7  -2  -8   -1.70    2.10
  -7  -2  -8   -0.60    1.80
   7   2   8    5.20    8.40
  -8  -2  -8   55.49    5.50
  -8  -2  -8   57.09    5.10
   8   2   8   55.39    9.50
  -9  -2  -8    3.50    1.60
  -9  -2  -8    1.60    1.40
   9   2   8    7.80    5.30
 -10  -2  -8   10.80    1.50
  10   2   8   21.70    5.00
  10   2   8   11.00    3.70
  -7   3   8   -0.60    4.60
  -6   3   8   16.70    5.30
  -5   3   8    3.40    5.80
   4  -3  -8   37.90    5.30
   3  -3  -8    2.30    3.60
  -3   3   8   -1.00    6.40
  -3   3   8    1.00    6.10
  -2   3   8  422.56   36.20
  -2   3   8  471.95   35.50
  -1   3   8    1.10    6.50
  -1   3   8   10.50    6.70
  -1   3   8    5.00    3.60
   0  -3  -8   55.99    6.00
   0   3   8   66.69    6.90
   0   3   8   71.29   11.10
   0   3   8   47.00    9.30
  -1  -3  -8   -1.20    2.20
   1   3   8   -0.10    6.90
   1   3   8    2.20    6.50
  -2  -3  -8   85.69    7.50
  -2  -3  -8   96.29    8.00
   2   3   8   84.99   11.90
   2   3   8  101.59   12.80
  -3  -3  -8   37.00    4.00
  -3  -3  -8   43.10    5.70
   3   3   8   47.40    9.50
   3   3   8   60.09   10.50
  -4  -3  -8   15.20    2.50
  -4  -3  -8   18.60    3.10
   4   3   8   17.00    6.60
   4   3   8   18.80    6.30
  -5  -3  -8  168.78   12.90
  -5  -3  -8  152.78   12.20
   5   3   8  155.28   15.10
  -6  -3  -8   10.70    2.70
  -6  -3  -8    7.40    1.80
   6   3   8   14.30    6.50
  -7  -3  -8   -0.70    2.20
  -7  -3  -8   -0.80    1.50
  -8  -3  -8   59.49    5.70
  -8  -3  -8   57.69    5.10
   8   3   8   65.59    9.40
  -9  -3  -8   20.10    2.30
   9   3   8   15.90    5.10
   6  -4  -8    1.70    4.00
  -6   4   8    5.30    4.70
  -6   4   8   -0.10    4.40
   5  -4  -8   10.30    4.50
  -5   4   8    4.20    3.20
  -5   4   8   12.00    5.60
   4  -4  -8   77.99    7.80
  -4   4   8   83.59   10.40
  -4   4   8   61.69    8.50
   3  -4  -8    7.30    3.90
  -3   4   8   11.60    6.30
  -3   4   8    2.20    4.80
   2  -4  -8  222.08   17.20
  -2   4   8  207.68   20.90
  -2   4   8  231.28   19.30
  -1   4   8  105.49   14.10
  -1   4   8   71.59   13.10
   0  -4  -8   95.29    9.00
   0   4   8  112.59   14.60
   0   4   8  117.39   15.40
  -1  -4  -8   43.50    5.70
   1   4   8   59.29   11.70
   1   4   8   65.89   10.40
   2   4   8   -2.10    5.90
  -3  -4  -8   -0.10    2.50
   3   4   8   18.20    6.90
   3   4   8    2.00    5.60
  -4  -4  -8   52.29    6.30
   4   4   8   57.99    8.60
   4   4   8   55.29   10.40
  -5  -4  -8    4.20    3.00
   5   4   8    7.30    5.90
   5   4   8   15.60    6.60
  -6  -4  -8  451.55   33.70
  -6  -4  -8  479.25   33.20
   6   4   8  430.56   34.60
   6   4   8  397.06   35.70
  -7  -4  -8    3.70    1.40
  -7  -4  -8    1.10    2.40
   7   4   8    8.60    6.20
   7   4   8   -1.40    5.30
   8   4   8   30.30    6.30
   8   4   8   13.80    5.50
   9   4   8   -1.10    4.10
   9   4   8    2.40    4.40
   6  -5  -8    8.40    4.00
  -6   5   8    2.30    2.30
  -6   5   8    1.40    6.80
   5  -5  -8    5.10    3.90
  -5   5   8    0.00    3.10
   4  -5  -8   58.79    6.90
  -4   5   8   57.19    9.30
  -4   5   8   36.30    8.40
   3  -5  -8    0.90    3.90
  -3   5   8   -1.50    5.60
  -3   5   8   -4.80    5.90
   2  -5  -8  237.48   18.80
  -2   5   8  233.08   20.80
  -2   5   8  254.97   23.10
   1  -5  -8   83.49    8.30
  -1   5   8   92.69   11.50
  -1   5   8   79.99   13.50
   0  -5  -8  165.88   12.90
   0   5   8  137.69   18.20
   0   5   8  160.48   18.00
  -1  -5  -8   53.49    5.90
   1   5   8   42.20    9.20
  -2  -5  -8   34.00    4.60
   2   5   8   31.50    8.50
   2   5   8   48.80    8.00
   3   5   8   26.20    7.00
   3   5   8   23.60    7.70
  -4  -5  -8   48.40    5.30
   4   5   8   54.79    8.10
   4   5   8   36.50    7.90
  -5  -5  -8    5.80    3.10
   5   5   8    5.90    6.40
   5   5   8    6.60    6.30
   6   5   8  284.97   26.40
   6   5   8  317.97   24.80
   7   5   8    4.80    6.10
   7   5   8   10.00    5.80
   8   5   8   56.89    8.20
   8   5   8   40.80    8.70
   9   5   8   -0.40    4.00
   9   5   8    0.20    3.80
   7  -6  -8   25.00    3.80
   6  -6  -8    7.60    3.80
  -6   6   8   -0.30    2.50
  -6   6   8    4.00    3.30
   5  -6  -8    3.80    3.60
  -5   6   8    1.50    3.40
  -4   6   8    5.20    4.90
   3  -6  -8   13.80    4.00
  -3   6   8    6.80    6.00
  -3   6   8    2.80    6.20
   2  -6  -8   83.29    8.10
  -2   6   8   68.39   12.80
  -2   6   8   76.09   10.40
   1  -6  -8    5.00    4.20
  -1   6   8    0.60    5.80
  -1   6   8    1.30    6.80
   0  -6  -8  159.88   12.50
   0   6   8  149.09   18.00
   0   6   8  147.79   15.00
  -1  -6  -8    0.30    3.30
   1   6   8   -7.70    6.30
   1   6   8    3.10    7.00
  -2  -6  -8   21.50    3.90
   2   6   8   22.90    7.30
   2   6   8    6.40    6.90
  -3  -6  -8   21.80    4.10
   3   6   8   22.20    7.20
   4   6   8   15.30    6.70
   4   6   8    5.40    7.20
   5   6   8   49.00    8.80
   5   6   8   29.80    8.40
   6   6   8  159.48   14.30
   6   6   8  138.49   16.60
   7   6   8    0.00    5.80
   7   6   8    7.30    5.50
   8   6   8   83.29   10.90
   8   6   8  109.99    9.90
   6  -7  -8    6.90    3.30
  -6   7   8    2.00    2.30
  -6   7   8    9.90    2.70
   5  -7  -8    8.70    3.40
  -5   7   8    5.50    4.10
   4  -7  -8   86.69    8.40
  -4   7   8   92.59   10.10
   3  -7  -8  108.19    9.80
  -3   7   8   88.99   11.90
  -2   7   8  109.39   13.50
   1  -7  -8   79.89    7.80
  -1   7   8   61.99   12.30
   0  -7  -8  148.79   11.50
   0   7   8  116.79   16.30
   0   7   8  139.99   13.70
  -1  -7  -8   16.60    3.60
   1   7   8    4.10    7.20
   1   7   8   12.90    6.30
  -2  -7  -8   21.30    4.10
   2   7   8   33.30    7.10
   2   7   8   13.30    7.50
   3   7   8  132.99   16.60
   4   7   8    6.40    7.30
   5   7   8    3.10    6.20
   5   7   8   -1.20    6.40
   6   7   8   69.69    9.20
   6   7   8   52.79    9.40
   7   7   8    4.30    5.10
   7   7   8    1.40    5.00
   8   7   8   17.60    4.40
   6  -8  -8   43.50    5.00
   5  -8  -8   44.30    4.80
  -5   8   8   28.10    4.40
  -5   8   8   41.30    4.90
   4  -8  -8   13.50    3.50
  -4   8   8    5.60    3.70
   3  -8  -8   50.29    5.80
  -3   8   8   49.50    8.30
   2  -8  -8   19.50    4.10
  -2   8   8   11.30    5.40
   1  -8  -8   31.40    4.70
  -1   8   8   17.80    6.50
   0   8   8  136.59   18.20
   1   8   8    9.10   10.20
  -2  -8  -8  148.89   11.50
   2   8   8  125.79   16.30
  -3  -8  -8   27.70    5.00
   3   8   8   21.50    7.40
   4   8   8    3.60    6.90
  -5  -8  -8    8.10    3.20
   5   8   8    5.50    6.30
   6   8   8    0.00    5.10
   7   8   8    2.00    3.80
   4  -9  -8    8.00    2.70
  -4   9   8    4.00    2.60
  -4   9   8    4.00    2.50
   3  -9  -8   -2.70    3.40
  -3   9   8   -0.90    3.30
   2  -9  -8    9.10    3.30
  -2   9   8    7.00    4.60
   1  -9  -8   34.00    5.00
  -1   9   8   30.00    6.10
   0  -9  -8   14.60    3.80
   0   9   8    9.00    5.60
  -1  -9  -8   20.30    3.50
   1   9   8    8.40    5.80
  -2  -9  -8   71.09    6.40
   2   9   8   59.89   10.50
  -3  -9  -8   15.10    2.90
   3   9   8   11.00    6.00
   4   9   8   15.20    6.10
  -5  -9  -8    1.00    2.10
   5   9   8    1.80    4.50
   6   9   8    8.10    3.30
   3 -10  -8    3.30    2.20
  -3  10   8    4.40    2.20
  -3  10   8    1.80    1.90
   2 -10  -8    2.90    2.30
  -2  10   8    0.50    2.50
   1 -10  -8    3.70    2.60
  -1  10   8    2.90    3.40
   0 -10  -8   19.70    3.10
   0  10   8    9.00    4.10
   1  10   8    2.60    3.90
  -2 -10  -8  143.39   10.90
   2  10   8  131.99   13.10
  -3 -10  -8   30.30    3.50
   3  10   8   21.60    5.10
  -4 -10  -8   35.10    3.70
   2   6  -9    5.70    2.70
   1   6  -9   17.70    3.40
   0   6  -9   49.30    5.60
  -1   6  -9   45.80    5.00
  -2   6  -9   38.10    4.30
  -3   6  -9   -0.50    1.60
  -4   6  -9   13.50    2.00
   4   5  -9    8.10    3.00
   3   5  -9    2.70    3.30
   3   5  -9    8.40    2.80
   2   5  -9    1.30    3.40
   1   5  -9   25.50    4.00
   0   5  -9   37.20    5.20
  -1   5  -9   11.20    2.80
  -2   5  -9  462.85   34.90
  -3   5  -9    5.10    2.20
  -4   5  -9   41.10    3.90
  -4   5  -9   30.30    3.40
  -5   5  -9    0.80    1.20
  -5   5  -9   -0.30    1.50
  -6   5  -9   59.89    4.90
   5   4  -9    0.20    3.00
   4   4  -9   50.49    6.70
   4   4  -9   51.09    5.40
   3   4  -9    0.60    2.90
   3   4  -9   -0.10    3.80
   2   4  -9   -0.40    3.50
   2   4  -9    4.70    3.40
   1   4  -9    3.40    3.20
   0   4  -9    1.40    2.90
  -1   4  -9   -1.70    2.50
  -2   4  -9  124.19   10.30
  -3   4  -9    5.60    2.40
  -4   4  -9   54.69    4.90
  -4   4  -9   52.29    5.30
  -5   4  -9    1.80    2.50
  -5   4  -9    0.50    1.80
  -6   4  -9   28.00    2.90
  -6   4  -9   18.50    3.00
  -7   4  -9    1.00    1.30
  -7   4  -9    0.20    1.30
   5   3  -9    3.00    3.70
   4   3  -9   58.59    8.00
   3   3  -9    4.70    3.30
   3   3  -9   -1.60    3.90
   2   3  -9   49.70    6.40
   2   3  -9   55.09    7.10
   1   3  -9    4.70    3.30
   0   3  -9    1.50    3.00
  -1   3  -9   29.20    5.00
  -2   3  -9    8.50    2.90
  -3   3  -9   12.90    2.90
  -3   3  -9    5.10    2.00
  -4   3  -9  144.49   11.80
  -4   3  -9  155.48   12.10
  -5   3  -9    1.00    2.00
  -5   3  -9    0.60    1.60
  -6   3  -9   48.00    4.60
  -7   3  -9    3.40    1.60
  -7   3  -9   -0.30    1.50
  -6  -2   9   28.80    5.10
   5   2  -9    5.80    2.80
   5   2  -9    1.10    4.10
   4   2  -9  111.99   10.60
  -4  -2   9  147.29   11.50
   3   2  -9    3.60    5.20
  -3  -2   9   11.80    4.30
   1   2  -9    9.90    3.40
   0   2  -9    0.10    1.40
   0   2  -9    1.90    2.80
  -1   2  -9   18.40    2.90
  -1   2  -9   20.80    3.40
  -2   2  -9    4.80    2.60
  -2   2  -9    5.10    2.10
  -3   2  -9    2.00    2.50
  -3   2  -9    3.00    2.00
  -4   2  -9  200.68   16.10
  -4   2  -9  218.08   16.30
  -5   2  -9   12.70    2.20
  -5   2  -9   14.30    2.50
  -6   2  -9   53.99    5.00
  -6   2  -9   49.00    4.90
  -7   2  -9   -1.50    1.70
  -7   2  -9   -0.50    1.80
  -8   2  -9    3.20    1.60
  -8   2  -9    5.50    1.60
  -6  -1   9    8.80    6.40
   5   1  -9   40.70    6.30
  -5  -1   9   52.69    7.00
   4   1  -9   39.70    5.50
   4   1  -9   36.00    6.20
  -4  -1   9   45.30    7.10
  -3  -1   9   -0.60    5.40
   2   1  -9  148.89   12.40
  -2  -1   9  135.39   12.90
  -1  -1   9   17.40    5.40
   0   1  -9   59.99    6.30
   0   1  -9   57.59    6.00
  -1   1  -9    5.20    2.20
  -1   1  -9    5.10    2.70
  -2   1  -9   21.40    3.30
  -2   1  -9   20.10    2.90
  -3   1  -9   41.10    5.00
  -3   1  -9   49.40    4.80
  -4   1  -9  250.37   19.20
  -4   1  -9  248.98   19.20
  -5   1  -9   40.60    4.40
  -5   1  -9   42.00    4.60
  -6   1  -9  556.74   41.40
  -6   1  -9  549.95   41.50
  -7   1  -9   -1.10    1.70
  -7   1  -9   -0.30    1.60
  -8   1  -9   43.00    3.90
  -8   1  -9   36.00    4.10
  -7   0   9   14.40    3.90
  -6   0   9    3.70    4.60
   5   0  -9    2.00    4.40
  -5   0   9    3.50    4.50
   4   0  -9   27.10    6.90
   3   0  -9    0.10    4.20
  -3   0   9    1.90    5.10
   2   0  -9  151.58   13.10
  -2   0   9  153.38   14.20
   1   0  -9    1.60    2.90
  -1   0   9    5.50    5.70
   0   0  -9   17.90    3.20
   0   0  -9   26.70    3.50
   0   0   9   32.80    6.80
  -1   0  -9    4.80    2.40
  -1   0  -9    3.20    2.30
  -2   0  -9   38.60    4.60
  -2   0  -9   38.70    4.90
  -3   0  -9    1.90    2.00
  -3   0  -9    0.90    2.10
   3   0   9    1.70    5.50
  -4   0  -9   59.29    5.60
  -4   0  -9   56.89    5.70
  -5   0  -9    5.10    1.90
  -5   0  -9    3.20    2.00
  -6   0  -9  303.97   22.50
  -6   0  -9  290.47   22.80
  -7   0  -9    0.80    1.70
  -7   0  -9    1.20    2.00
  -8   0  -9   82.79    7.50
  -8   0  -9   90.99    7.30
  -9   0  -9   22.00    2.70
  -9   0  -9   23.80    2.50
   9   0   9   19.80    4.60
  -7   1   9    3.50    3.80
  -6   1   9    1.70    4.50
   5  -1  -9    4.00    4.20
  -5   1   9    1.70    4.80
   4  -1  -9    5.10    4.50
  -4   1   9   16.00    7.50
  -3   1   9   40.10    7.00
   2  -1  -9   82.79    8.70
  -2   1   9   87.49   10.80
   1  -1  -9    9.10    3.00
  -1   1   9   14.10    6.60
   0  -1  -9  102.09    8.70
   0  -1  -9   87.59    8.60
   0   1   9  115.49   12.90
  -1  -1  -9   26.70    4.30
  -1  -1  -9   28.90    3.60
   1   1   9   39.90    8.60
  -2  -1  -9   14.40    2.70
  -2  -1  -9   15.30    2.60
   2   1   9    9.70    7.00
   2   1   9   20.40    8.00
  -3  -1  -9   35.10    4.40
  -3  -1  -9   32.60    4.10
   3   1   9   42.70    8.60
   3   1   9   28.80    7.10
  -4  -1  -9    9.10    2.40
  -4  -1  -9    9.10    2.10
   4   1   9    8.40    5.90
  -5  -1  -9  106.69    8.50
  -5  -1  -9  103.29    8.90
   5   1   9  107.09   13.00
  -6  -1  -9   22.80    3.20
   6   1   9   29.10    7.30
  -7  -1  -9   -0.30    1.60
  -7  -1  -9   -0.40    2.00
   7   1   9    2.50    5.60
  -8  -1  -9  154.08   12.20
   8   1   9  152.28   14.40
  -9  -1  -9    2.60    1.10
  -9  -1  -9    0.80    1.30
   9   1   9    2.00    3.90
  -7   2   9    3.10    3.80
  -6   2   9    4.20    4.50
  -5   2   9    1.20    4.70
   4  -2  -9   10.10    4.80
   3  -2  -9  134.29   12.90
  -3   2   9  147.69   14.10
   2  -2  -9  148.29   12.90
  -2   2   9  151.98   14.70
   1  -2  -9   25.90    3.80
   0  -2  -9  148.79   11.40
   0  -2  -9  125.69   11.10
   0   2   9  126.29   15.40
   0   2   9  150.98   15.30
  -1  -2  -9   25.30    3.40
  -1  -2  -9   26.40    3.90
  -2  -2  -9    0.80    2.00
  -2  -2  -9    4.00    2.30
   2   2   9   14.80    7.90
   2   2   9    0.40    6.60
  -3  -2  -9  273.57   21.70
  -3  -2  -9  309.37   22.00
   3   2   9  287.87   25.10
   3   2   9  271.57   24.50
  -4  -2  -9    3.40    2.30
  -4  -2  -9    2.20    1.80
   4   2   9    1.00    5.90
   4   2   9   18.90    7.30
  -5  -2  -9    2.60    2.30
  -5  -2  -9    2.10    1.60
   5   2   9   10.40    6.90
   5   2   9   -2.40    5.70
  -6  -2  -9   53.09    6.20
  -6  -2  -9   69.29    6.60
  -7  -2  -9    0.20    1.50
  -7  -2  -9    3.10    2.10
   7   2   9    0.00    5.80
  -8  -2  -9  159.48   12.80
  -8  -2  -9  164.88   13.10
   8   2   9  175.48   16.00
   8   2   9  178.18   15.70
  -9  -2  -9    0.10    1.10
  -9  -2  -9    0.00    1.40
   9   2   9    1.10    4.30
   9   2   9    1.00    3.90
  -7   3   9    2.00    3.50
  -6   3   9   21.70    4.90
  -5   3   9   17.90    5.20
  -4   3   9   11.00    6.40
  -3   3   9   23.10    6.70
  -2   3   9   64.39    9.10
  -1   3   9   15.60    6.90
  -1   3   9    3.50    5.80
   0   3   9  178.48   17.60
   0   3   9  169.18   18.10
  -1  -3  -9    1.30    2.50
  -1  -3  -9    2.90    2.30
   1   3   9    5.10    6.50
   1   3   9    5.40    8.20
  -2  -3  -9  209.08   18.90
  -2  -3  -9  262.07   19.40
   2   3   9  264.67   22.20
   2   3   9  277.87   23.60
  -3  -3  -9   61.99    6.10
  -3  -3  -9   74.29    6.90
   3   3   9   81.79   10.20
   3   3   9   70.49   11.90
  -4  -3  -9   45.10    5.40
  -4  -3  -9   41.60    4.40
   4   3   9   40.00    7.90
   4   3   9   60.99    8.80
  -5  -3  -9   62.29    6.10
  -5  -3  -9   53.09    5.10
   5   3   9   57.19   10.50
   5   3   9   61.39   10.10
  -6  -3  -9    1.70    1.40
  -6  -3  -9    1.20    2.70
  -7  -3  -9   -1.60    1.30
  -7  -3  -9    0.00    2.20
   7   3   9    1.80    6.10
   7   3   9    1.50    5.40
  -8  -3  -9   67.09    5.30
  -8  -3  -9   62.79    5.80
   8   3   9   66.69    9.20
   9   3   9   11.50    4.50
   9   3   9    2.10    3.80
  -5   4   9    2.10    4.70
  -3   4   9    0.50    6.10
  -2   4   9   28.30    7.20
  -2   4   9   13.70    6.50
  -1   4   9   13.20    6.80
  -1   4   9    3.50    6.60
   0   4   9   67.99   13.10
   0   4   9   84.79   12.00
   1   4   9    2.60    6.90
   1   4   9    5.20    7.90
  -2  -4  -9  128.79   11.20
   2   4   9  141.19   14.60
   2   4   9  129.79   16.10
  -3  -4  -9    1.70    2.80
   3   4   9   -3.70    6.10
   3   4   9    6.20    7.20
  -4  -4  -9    9.40    2.90
   4   4   9   20.60    7.20
   4   4   9   11.30    6.50
  -5  -4  -9   -1.40    4.20
   5   4   9    1.60    8.00
  -6  -4  -9    1.70    2.40
   6   4   9    4.10    5.80
   6   4   9    7.70    6.40
  -7  -4  -9   36.30    4.70
   7   4   9   32.40    6.80
   7   4   9   55.19    8.70
   8   4   9   24.20    5.60
   9   4   9   14.20    4.30
   4  -5  -9   46.50    6.00
  -4   5   9   55.39    7.90
  -4   5   9   36.90    6.40
   3  -5  -9   32.60    5.90
  -3   5   9   35.70    6.60
  -3   5   9   16.90    7.10
  -2   5   9   16.20    6.40
  -2   5   9    3.60    6.00
  -1   5   9   11.70    6.50
  -1   5   9    6.00    6.80
   0   5   9   81.39   12.10
   0   5   9  102.09   14.10
   1   5   9    7.10    6.70
   1   5   9    5.20    7.10
   2   5   9   78.89   11.80
   2   5   9   74.49   12.80
   3   5   9   19.70    7.20
   3   5   9    5.30    6.90
   4   5   9   85.59   12.50
   4   5   9   77.49   12.30
   5   5   9    0.40    7.40
   6   5   9    2.30    5.50
   6   5   9    7.80    6.10
   7   5   9   24.40    6.10
   8   5   9   21.70    4.90
   8   5   9    1.60    4.60
  -5   6   9    1.50    2.30
   4  -6  -9    3.70    3.60
  -4   6   9    4.00    3.60
   3  -6  -9   17.30    4.20
  -3   6   9   10.40    5.20
  -3   6   9   18.00    5.40
   2  -6  -9    7.00    4.50
  -2   6   9    2.90    7.30
  -2   6   9    1.60    6.60
  -1   6   9    1.90   10.70
   0  -6  -9   29.40    4.70
   0   6   9   15.60    7.80
   0   6   9   22.80    6.90
   1   6   9   11.00    6.60
   1   6   9    3.20    6.60
   2   6   9  110.69   12.60
   2   6   9   80.99   13.40
   3   6   9   26.60    7.80
   4   6   9    7.70    9.90
   5   6   9    2.50    5.90
   5   6   9    1.00    6.20
   6   6   9    8.80    5.60
   6   6   9    3.20    6.00
   7   6   9   13.00    5.80
   7   6   9   15.10    5.30
   8   6   9    8.80    4.00
   8   6   9    1.40    3.60
   5  -7  -9    8.50    3.30
  -5   7   9    2.50    2.30
  -5   7   9    4.70    2.90
   4  -7  -9  242.88   18.40
  -4   7   9  233.88   19.20
   3  -7  -9    1.70    3.50
  -3   7   9   -1.00    4.10
   2  -7  -9   11.90    3.60
  -2   7   9    6.70    5.30
   1  -7  -9    5.80    3.80
  -1   7   9   -0.20    5.60
   0   7   9   49.20    9.00
   0   7   9   10.40    7.70
  -2  -7  -9   29.30    4.80
   2   7   9   33.50    7.10
   2   7   9   21.30    7.00
   3   7   9   14.70    7.00
   4   7   9   35.70    7.20
   5   7   9    1.60    5.40
   5   7   9    1.50    5.50
   6   7   9   14.50    5.80
   7   7   9    4.30    4.10
   7   7   9    4.80    4.00
   5  -8  -9   12.60    3.40
  -5   8   9    5.10    1.80
  -4   8   9    9.40    2.90
  -3   8   9    5.00    3.70
   2  -8  -9   13.70    3.30
  -2   8   9   13.30    4.80
   1  -8  -9   48.70    5.70
  -1   8   9   52.29    8.70
   0  -8  -9   22.20    4.10
   0   8   9   16.80    6.40
  -1  -8  -9    4.00    3.50
   1   8   9   -0.90    5.30
  -2  -8  -9   46.90    5.20
   2   8   9   27.30    7.60
   3   8   9    4.20    6.10
   4   8   9   75.29   10.80
   5   8   9   -0.30    4.70
   6   8   9    3.10    4.10
   3  -9  -9   11.70    2.50
  -3   9   9    7.30    2.70
   2  -9  -9   17.40    2.90
  -2   9   9   12.40    3.70
   1  -9  -9    2.60    2.80
  -1   9   9    2.60    3.70
   0   9   9    2.10    4.10
   1   9   9    8.60    4.90
  -2  -9  -9   32.30    4.30
   2   9   9   20.40    6.90
  -3  -9  -9   14.80    2.80
   3   9   9    5.60    4.70
   4   9   9   62.19    8.40
   5   9   9    1.60    3.40
   1 -10  -9    3.50    2.10
  -1  10   9    1.80    2.40
   0 -10  -9    1.50    2.00
   0  10   9    0.30    2.60
  -1 -10  -9    4.70    2.20
   1  10   9    3.10    3.00
  -2 -10  -9    3.10    2.00
   2  10   9    2.80    3.00
   1   5 -10    2.20    2.70
   0   5 -10    4.80    2.60
  -1   5 -10   -1.40    2.10
  -2   5 -10   16.00    2.50
  -3   5 -10    2.00    1.60
   3   4 -10    2.40    3.10
   2   4 -10   20.20    4.00
   1   4 -10    0.40    3.60
   0   4 -10  127.09   10.80
  -1   4 -10    4.50    2.60
  -2   4 -10   51.79    5.30
  -3   4 -10   22.70    3.60
  -4   4 -10    0.70    1.70
  -4   4 -10   -0.90    1.20
  -5   4 -10    1.10    1.40
  -5   4 -10    2.00    1.90
   4   3 -10    0.10    3.20
   3   3 -10   -2.70    3.60
   2   3 -10    4.40    3.60
   1   3 -10    0.20    3.10
   0   3 -10  120.79   10.50
  -1   3 -10    3.80    2.70
  -2   3 -10   45.20    5.40
  -2   3 -10   62.49    5.90
  -3   3 -10   43.10    4.60
  -3   3 -10   35.80    4.50
  -4   3 -10   -0.40    1.60
  -4   3 -10    0.60    2.00
  -5   3 -10    0.30    1.70
  -5   3 -10   -1.40    1.40
  -6   3 -10   23.70    2.90
  -6   3 -10   24.70    2.90
   5   2 -10    1.40    3.20
  -5  -2  10    6.90    3.20
   4   2 -10   -0.90    3.60
   3   2 -10   -0.10    4.00
   2   2 -10   34.60    4.20
   2   2 -10   25.40    4.70
   1   2 -10    5.20    3.30
   0   2 -10  132.49   11.30
  -1   2 -10    0.50    1.90
  -1   2 -10    1.00    2.70
  -2   2 -10  128.29   10.50
  -2   2 -10  124.09   10.30
  -3   2 -10   49.60    4.90
  -3   2 -10   47.90    5.20
  -4   2 -10   27.70    3.70
  -4   2 -10   27.90    3.90
  -5   2 -10    5.40    2.00
  -5   2 -10    3.30    1.80
  -6   2 -10   33.10    3.80
  -6   2 -10   36.60    3.80
  -7   2 -10    0.80    1.40
  -7   2 -10    0.50    1.40
  -6  -1  10   36.50    5.00
   5   1 -10    4.90    3.70
  -5  -1  10   21.00    4.10
   4   1 -10   -0.50    3.90
   3   1 -10   87.29    8.90
  -3  -1  10   64.99    8.10
   2   1 -10    8.40    3.90
   0   1 -10  262.87   20.50
  -1   1 -10   -2.50    3.80
  -1   1 -10    2.20    2.60
  -2   1 -10  137.89   12.90
  -2   1 -10  137.39   11.40
  -3   1 -10   -1.10    1.90
  -4   1 -10   10.50    2.50
  -4   1 -10   10.30    2.20
  -5   1 -10   17.00    2.60
  -5   1 -10   21.50    3.30
  -6   1 -10    0.90    1.90
  -6   1 -10    1.80    1.70
   6  -1  10   -1.00    4.10
  -7   1 -10    1.40    1.50
  -7   1 -10    2.30    1.70
   7  -1  10    1.70    3.70
  -6   0  10   91.09    8.20
   5   0 -10   -1.10    3.60
  -5   0  10   11.10    5.60
   4   0 -10   12.10    4.40
   4   0 -10   11.20    3.10
  -4   0  10   22.90    4.80
   3   0 -10   -0.50    4.10
  -3   0  10    0.60    4.40
   2   0 -10    2.00    5.00
  -2   0  10    9.90    5.50
  -1   0  10   29.80    6.70
   0   0 -10   57.89    6.30
  -1   0 -10    0.30    2.50
  -1   0 -10    3.70    2.40
   1   0  10   18.80    8.80
  -2   0 -10   15.50    2.80
  -2   0 -10    7.50    2.60
  -3   0 -10   27.00    3.90
  -3   0 -10   20.90    3.00
  -4   0 -10   67.59    6.00
  -4   0 -10   55.59    6.60
   4   0  10   60.79    9.70
  -5   0 -10    6.20    2.10
  -5   0 -10    4.40    2.20
   5   0  10   11.90    5.50
  -6   0 -10    1.80    2.00
  -6   0 -10    0.00    1.70
   6   0  10   -2.60    6.00
  -7   0 -10   29.20    3.10
  -7   0 -10   24.50    2.90
   7   0  10   21.10    5.40
  -8   0 -10   50.09    4.00
  -8   0 -10   40.60    4.20
   8   0  10   40.40    6.60
  -6   1  10  172.98   14.00
  -5   1  10    4.90    4.30
   4  -1 -10    5.40    4.00
  -4   1  10    9.00    4.60
   3  -1 -10    0.10    4.10
  -3   1  10   -5.00    5.10
   2  -1 -10   -0.90    4.00
  -2   1  10    0.50    5.80
   1  -1 -10    0.60    3.30
  -1   1  10    4.60    6.80
   0  -1 -10    0.40    2.70
   0   1  10    7.30    6.50
  -1  -1 -10    4.20    2.40
  -1  -1 -10    2.90    2.50
   1   1  10    8.10    6.90
  -2  -1 -10  112.29    9.80
  -2  -1 -10  119.59    9.90
   2   1  10  124.59   14.20
  -3  -1 -10   65.49    6.50
  -3  -1 -10   67.89    6.50
   3   1  10   67.99   11.30
  -4  -1 -10   23.70    3.10
  -4  -1 -10   21.10    3.00
   4   1  10   21.40    6.90
  -5  -1 -10    2.40    2.10
  -5  -1 -10    3.50    1.90
   5   1  10    2.50    5.60
  -6  -1 -10    1.40    2.00
  -6  -1 -10    2.90    1.70
   6   1  10    3.70    5.30
  -7  -1 -10   34.80    3.40
  -7  -1 -10   28.30    3.50
   7   1  10   28.00    6.20
  -8  -1 -10   16.30    2.20
  -8  -1 -10   19.70    2.30
   8   1  10   14.40    4.90
  -6   2  10   32.90    4.90
  -5   2  10   15.60    4.70
   4  -2 -10  141.89   15.40
  -4   2  10  180.08   14.30
   3  -2 -10    1.60    3.60
  -3   2  10    4.30    5.60
  -2   2  10   10.00    7.00
   1  -2 -10   -0.60    3.10
  -1   2  10    0.00    6.50
   0  -2 -10   28.80    3.80
  -1  -2 -10   17.60    3.20
   1   2  10   20.00    7.30
  -2  -2 -10   30.10    4.10
  -2  -2 -10   31.80    3.90
   2   2  10   27.60    7.90
  -3  -2 -10   39.90    5.00
  -3  -2 -10   34.20    5.00
   3   2  10   46.00   10.50
   3   2  10   42.10    9.30
  -4  -2 -10  108.59    9.20
   4   2  10  100.59   16.40
   4   2  10  105.79   14.40
  -5  -2 -10    2.60    2.40
   5   2  10    5.60    6.60
   5   2  10    2.10    5.60
  -6  -2 -10    8.40    2.40
  -6  -2 -10   10.60    1.90
   6   2  10   19.20    6.30
   6   2  10    9.30    5.70
  -7  -2 -10   35.70    4.80
  -7  -2 -10   42.00    3.80
   7   2  10   32.00    7.40
   7   2  10   48.00    8.50
  -8  -2 -10    3.90    1.60
  -8  -2 -10    5.30    1.20
   8   2  10   10.80    4.60
   8   2  10    7.20    4.60
  -6   3  10   44.50    6.20
  -5   3  10    9.50    4.50
  -4   3  10   75.59    9.10
  -3   3  10   23.70    6.30
  -2   3  10   28.00    7.10
  -1   3  10   21.00    7.10
   0   3  10    9.20    7.30
   0   3  10    8.50    6.50
   1   3  10    9.90    7.70
   1   3  10    5.80    6.80
  -2  -3 -10   97.89    9.20
  -2  -3 -10  121.89    9.80
   2   3  10  138.29   15.00
  -3  -3 -10  115.59    9.40
  -3  -3 -10  101.39    8.80
   3   3  10  118.59   16.20
   3   3  10  111.79   18.90
  -4  -3 -10  639.84   49.30
  -4  -3 -10  690.03   49.70
   4   3  10  654.63   53.09
  -5  -3 -10    6.20    1.80
  -5  -3 -10    3.90    2.30
   5   3  10    4.00    6.60
   5   3  10    0.70    5.70
  -6  -3 -10   14.60    2.70
  -6  -3 -10   18.00    2.60
   6   3  10   16.70    6.20
   6   3  10   25.60    6.50
  -7  -3 -10    3.60    1.90
   7   3  10    4.10    6.80
   7   3  10    6.30    5.70
   8   3  10    2.80    4.30
   8   3  10    5.30    4.50
  -4   4  10  142.09   12.80
  -3   4  10   20.70    6.00
  -2   4  10   30.30    6.10
  -1   4  10    2.80    7.20
   0   4  10   34.20    7.90
   0   4  10   -4.10   10.40
   1   4  10    8.60    7.20
   1   4  10    6.90    7.40
   2   4  10   40.00   10.70
  -3  -4 -10   -1.30    2.40
   3   4  10    1.40    7.80
   3   4  10    1.40    6.50
  -4  -4 -10  120.29   10.10
   4   4  10  113.59   14.20
  -5  -4 -10    7.00    2.60
   5   4  10    5.50    6.20
   5   4  10   21.80    6.70
  -6  -4 -10  141.09   11.50
   6   4  10  132.49   14.70
   6   4  10  151.98   13.90
   7   4  10    1.00    4.80
   7   4  10    8.40    5.30
   8   4  10    9.00    4.40
   8   4  10    2.60    4.20
  -4   5  10   64.09    7.50
  -3   5  10    0.80    5.00
  -3   5  10    1.50    3.30
  -2   5  10   53.09    8.20
  -1   5  10    5.00    6.10
   0   5  10   -2.70    6.10
   1   5  10    0.20    6.60
   1   5  10   -2.00    6.60
   2   5  10   28.80    7.30
   2   5  10   12.90    7.50
   3   5  10    6.70    6.50
   4   5  10   53.29    9.80
   4   5  10   34.40    7.70
   5   5  10   14.10    6.30
   5   5  10    5.80    5.90
   6   5  10  190.58   15.80
   6   5  10  163.88   16.70
   7   5  10    1.70    4.80
   7   5  10    6.60    4.90
  -5   6  10   24.70    3.20
  -4   6  10   74.39    7.40
  -3   6  10   61.39    7.10
  -2   6  10   66.59    8.70
  -1   6  10   19.90    5.70
  -1   6  10   10.30    6.00
   0   6  10   33.80    6.30
   0   6  10   10.00    6.60
   1   6  10   53.69    9.40
   1   6  10   34.40    8.10
   2   6  10    6.40    6.10
   2   6  10   13.00    6.30
   3   6  10   32.90    7.80
   3   6  10   49.99    7.40
   5   6  10    2.30    5.20
   5   6  10    8.20    5.50
   6   6  10   49.90    7.40
   6   6  10   30.60    6.30
   7   6  10    2.00    3.70
   7   6  10    6.90    4.10
  -4   7  10    3.10    1.70
  -3   7  10    3.90    3.00
  -2   7  10   44.60    7.10
  -1   7  10    5.30    4.70
   0   7  10  141.79   16.00
   0   7  10  191.58   14.50
   1   7  10    3.00    5.30
   1   7  10    1.40    4.90
   2   7  10    8.90    5.10
   2   7  10   -2.00    5.50
   3   7  10   12.30    6.20
   3   7  10   27.50    5.50
   4   7  10    3.70    5.00
   4   7  10   -2.20    5.10
   5   7  10    0.70    4.50
   5   7  10    1.40    4.30
   6   7  10   22.30    4.90
  -3   8  10   -0.50    2.20
  -2   8  10    2.40    3.10
  -1   8  10   16.90    4.20
   0   8  10   42.90    7.90
   1   8  10    2.90    4.90
   2   8  10    2.40    6.30
   3   8  10    1.40    4.20
   4   8  10    6.20    4.40
   5   8  10    5.50    4.10
  -1   9  10    9.50    3.00
   0   9  10   79.19    8.00
   1   9  10   12.20    3.60
   2   9  10   11.30    3.90
   3   9  10    1.30    3.10
   0   4 -11    1.40    2.30
  -1   4 -11   -1.30    1.90
  -2   4 -11  110.99    8.90
   2   3 -11    0.00    2.90
   1   3 -11    2.20    2.90
   0   3 -11   13.80    3.00
  -1   3 -11    2.60    2.30
  -2   3 -11  109.49    9.00
  -3   3 -11    5.70    1.90
  -4   3 -11   19.10    2.30
   3   2 -11    3.40    3.10
   2   2 -11   11.10    3.70
   1   2 -11    2.50    5.10
   0   2 -11    8.20    2.90
  -1   2 -11    0.20    2.40
  -2   2 -11   91.99    7.90
  -3   2 -11    7.10    1.80
  -3   2 -11    8.40    2.50
  -4   2 -11  156.18   12.30
  -4   2 -11  162.48   12.40
  -5   2 -11   -0.30    1.40
  -5   2 -11    2.50    1.50
   4   1 -11    6.00    3.00
   3   1 -11    4.10    3.30
   2   1 -11    7.10    5.40
   1   1 -11   -2.10    3.00
   0   1 -11   22.30    3.60
  -1   1 -11   -1.80    2.40
  -2   1 -11    6.60    2.50
  -2   1 -11    7.40    2.10
  -3   1 -11   -0.10    1.90
  -3   1 -11    2.40    1.90
  -4   1 -11   10.20    2.20
  -5   1 -11    1.70    1.60
  -5   1 -11    2.00    1.70
  -6   1 -11   76.29    6.00
  -6   1 -11   70.49    6.20
   4   0 -11    3.50    3.00
  -4   0  11   11.50    3.60
   3   0 -11   -0.60    3.50
   3   0 -11    0.40    3.30
  -3   0  11    3.10    3.90
   2   0 -11   90.39    8.90
  -2   0  11   90.19   10.70
   1   0 -11    6.50    3.30
  -1   0  11   15.20    4.60
   0   0 -11    5.10    2.90
  -1   0 -11    0.30    2.40
  -2   0 -11    4.60    2.40
  -2   0 -11    2.20    2.20
  -3   0 -11   26.70    3.70
  -3   0 -11   20.80    3.00
  -4   0 -11    3.20    2.00
  -4   0 -11    4.30    2.00
  -5   0 -11   -1.80    1.80
  -5   0 -11    0.40    1.60
  -6   0 -11  115.99    8.90
  -6   0 -11  110.59    9.10
  -7   0 -11   25.50    3.10
  -7   0 -11   27.60    3.20
   5  -1 -11    1.30    1.80
  -5   1  11    1.60    3.50
  -4   1  11   42.30    6.30
   3  -1 -11    1.30    3.20
  -3   1  11    7.90    4.40
   2  -1 -11  130.19   12.00
  -2   1  11  145.59   12.80
   1  -1 -11    9.00    3.40
  -1   1  11   10.40    5.60
   0  -1 -11   25.00    3.80
   0   1  11   44.40    8.20
  -1  -1 -11   46.90    5.30
   1   1  11   55.09    9.30
  -2  -1 -11   -1.40    2.20
  -2  -1 -11    0.50    2.20
   2   1  11    7.40    5.70
  -3  -1 -11    3.30    2.30
  -3  -1 -11    6.10    2.10
  -4  -1 -11   34.20    3.90
  -4  -1 -11   33.90    4.40
   4   1  11   32.10    6.50
  -5  -1 -11    1.50    1.70
  -5  -1 -11    1.10    2.00
   5   1  11    5.20    4.60
  -6  -1 -11   73.79    6.70
  -6  -1 -11   82.89    6.30
   6   1  11   72.69    8.80
  -7  -1 -11   -0.40    1.00
  -7  -1 -11    1.00    1.50
   7   1  11   -2.70    3.30
  -5   2  11   50.29    6.00
  -4   2  11   29.90    4.90
  -3   2  11    6.50    4.60
   2  -2 -11   66.29    7.80
  -2   2  11   92.29   10.00
  -1   2  11   15.50    6.20
   0  -2 -11  124.79   10.80
   0   2  11  130.59   13.40
  -1  -2 -11  138.59   11.80
   1   2  11  157.98   14.80
  -2  -2 -11   22.30    3.10
  -2  -2 -11   19.90    3.20
   2   2  11   35.70    7.00
  -3  -2 -11    1.40    2.20
  -3  -2 -11    1.00    1.90
   3   2  11    3.60    5.40
   3   2  11   10.90    6.30
  -4  -2 -11    7.20    2.50
  -4  -2 -11   11.50    2.20
   4   2  11   18.70    6.40
   4   2  11    9.40    6.40
  -5  -2 -11    2.10    1.50
  -5  -2 -11   -1.40    1.90
   5   2  11    0.40    5.10
  -6  -2 -11   24.80    2.70
  -6  -2 -11   22.60    2.80
   6   2  11   17.20    5.60
   6   2  11   35.00    5.70
  -7  -2 -11    2.70    1.60
   7   2  11    1.70    5.10
  -5   3  11    1.70    3.20
  -4   3  11   44.20    6.30
  -3   3  11   10.90    4.90
  -2   3  11   50.89    8.40
  -1   3  11   10.10    6.00
   0   3  11   13.00    6.40
   1   3  11    4.60    5.60
   1   3  11    7.60    6.60
   2   3  11   12.80    6.80
   2   3  11    3.30    5.90
  -3  -3 -11   36.50    4.80
   3   3  11   51.99    7.70
   3   3  11   31.30    7.10
  -4  -3 -11    0.10    2.20
   4   3  11    8.10    6.40
   4   3  11    1.90    5.30
  -5  -3 -11    4.40    2.30
   5   3  11    6.10    6.30
   5   3  11    4.10    5.90
  -6  -3 -11   40.50    4.40
   6   3  11   43.50    8.10
   7   3  11   18.40    4.70
   7   3  11   12.80    4.60
  -5   4  11   13.70    3.20
  -4   4  11   15.40    4.00
  -3   4  11    1.90    4.40
  -2   4  11   64.69    8.80
  -1   4  11    0.60    5.50
   0   4  11   -0.20    5.50
   0   4  11   16.00    6.20
   1   4  11    9.90    6.40
   1   4  11    4.90    6.00
   2   4  11  100.69   11.80
   2   4  11   86.29   12.00
   3   4  11    3.10    5.80
   3   4  11    5.20    6.20
   4   4  11    3.10    5.40
   4   4  11   -4.00    5.90
   5   4  11    3.60    6.90
   5   4  11    4.00    5.20
   6   4  11   18.00    5.40
   7   4  11   24.10    4.90
  -3   5  11   13.60    4.20
  -2   5  11   17.00    4.90
  -1   5  11    5.30    5.20
  -1   5  11    1.10    3.60
   0   5  11   20.30    5.90
   0   5  11   15.00    5.90
   1   5  11    9.60    5.90
   1   5  11   19.90    5.90
   2   5  11   14.50    6.20
   3   5  11    9.40    5.90
   3   5  11   23.20    6.00
   4   5  11    5.40    5.50
   4   5  11    3.10    5.20
   5   5  11   45.20    7.10
   6   5  11    9.60    4.70
   6   5  11    4.60    4.20
  -2   6  11    2.60    3.00
  -2   6  11   13.40    3.90
  -1   6  11    1.40    4.50
  -1   6  11   -0.30    3.30
   0   6  11   16.10    5.20
   1   6  11    5.70    5.30
   1   6  11   13.00    5.00
   2   6  11   52.49    9.80
   2   6  11   93.39    9.30
   3   6  11    3.30    6.30
   3   6  11   10.50    4.80
   4   6  11    3.20    4.80
   4   6  11   18.20    5.60
   5   6  11   20.50    4.70
   6   6  11    0.50    3.90
  -2   7  11    4.50    2.20
  -1   7  11    1.80    3.00
   0   7  11   65.09    7.80
   1   7  11   13.20    4.70
   2   7  11   99.79   11.80
   2   7  11  138.09   10.80
   3   7  11    8.70    3.90
   3   7  11   -0.10    4.00
   4   7  11    2.30    3.50
   4   7  11    2.40    3.90
   5   7  11    4.10    3.30
  -1   8  11    6.30    2.40
   0   8  11   39.70    5.20
   1   8  11    3.60    3.00
   2   8  11   35.60    5.90
   3   8  11    0.60    3.00
   0   2 -12   35.00    4.40
  -1   2 -12    7.40    2.10
  -2   2 -12    3.40    1.70
   2   1 -12    2.30    2.50
   1   1 -12    5.30    2.70
   0   1 -12   35.00    4.50
  -1   1 -12    0.80    2.00
  -2   1 -12    7.70    2.00
  -4   1 -12    3.40    1.50
  -4   1 -12    0.80    1.30
   2   0 -12    9.70    4.20
   1   0 -12   -0.60    2.70
   0   0 -12  201.78   15.80
  -1   0 -12   25.00    3.80
  -2   0 -12    5.60    2.10
  -3   0 -12    3.70    1.70
  -4   0 -12   -0.10    1.40
  -4   0 -12    1.40    1.40
  -5   0 -12    0.30    1.20
  -5   0 -12    0.40    1.30
  -3   1  12    2.10    3.10
  -2   1  12   49.50    5.80
   1  -1 -12   12.00    3.00
   0  -1 -12   68.09    6.80
   0   1  12   79.69    8.10
  -1  -1 -12    3.30    2.20
  -2  -1 -12   45.80    4.60
  -3  -1 -12    2.80    1.60
  -4  -1 -12    1.90    1.40
  -4  -1 -12    1.50    1.70
  -5  -1 -12    1.30    1.10
  -5  -1 -12   -0.30    1.50
  -3   2  12   11.60    3.50
  -2   2  12    5.30    3.60
  -1   2  12    3.80    4.20
   0   2  12  145.49   14.30
   1   2  12  127.19   12.80
   2   2  12  210.28   17.30
   3   2  12    5.80    4.30
  -3   3  12   27.60    4.00
  -2   3  12    2.50    3.90
  -1   3  12   18.50    4.80
   3   3  12   11.40    4.80
   4   3  12  183.88   13.80
   4   3  12  137.39   13.70
   5   3  12    6.00    3.60
   5   3  12    1.30    3.20
  -3   4  12   18.20    3.40
  -2   4  12    3.20    3.60
  -1   4  12    2.10    4.20
   2   4  12   14.50    4.50
   3   4  12    5.00    4.30
   3   4  12   10.10    4.70
   4   4  12   94.69   11.30
   4   4  12  133.99   10.70
   5   4  12   29.30    4.60
  -2   5  12   24.80    4.60
  -1   5  12    7.30    3.80
   0   5  12    4.80    4.30
   1   5  12    6.40    3.20
   1   5  12   22.40    4.60
   2   5  12   48.20    7.10
   3   5  12   11.50    4.40
   3   5  12   11.70    4.00
   4   5  12   35.10    6.20
  -1   6  12    9.50    3.00
   0   6  12    1.60    3.30
   0   6  12   -0.50    3.00
   1   6  12    4.10    3.60
   1   6  12   -0.40    2.50
   2   6  12   24.50    4.10
   2   6  12   17.10    4.80
   3   6  12    9.40    3.60
   3   6  12    1.60    4.40
   4   6  12   19.80    4.10
   1   2  13   12.10    3.10
   0   3  13   46.40    5.90
   1   3  13   10.70    3.30
   2   3  13    3.20    5.30
   0   0   0    0.00    0.00

_computing_structure_solution     'SHELXT 2018/2 (Sheldrick, 2018)'
;
_shelx_hkl_checksum                20870
_olex2_submission_special_instructions  'No special instructions were received'
